# Supplementary material for: Photocatalytic redox-neutral hydroxyalkylation of N-heteroaromatics with aldehydes
Source: PubMed Central journal article supplement — Chem Sci. 2020 Oct 12;11(44):12206–11. doi: 10.1039/d0sc04114a (PMC8163015; doi:10.1039/d0sc04114a), 2020-10-12
Supplement: SC-011-D0SC04114A-s001.pdf [file SC-011-D0SC04114A-s001.pdf]

*Supplementary Information*

Photocatalytic Redox-Neutral Minisci Hydroxyalkylation of N-Heteroaromatics with Aldehydes

Hiromu Fuse,<sup>a</sup> Hiroyasu Nakao,<sup>a</sup> Yutaka Saga,<sup>b</sup> Arisa Fukatsu,<sup>c</sup> Mio Kondo,<sup>b</sup> Shigeyuki Masaoka,<sup>b</sup>  
Harunobu Mitsunuma,<sup>\*,a</sup> and Motomu Kanai<sup>\*,a</sup>

<sup>a</sup> Graduate School of Pharmaceutical Sciences, The University of Tokyo, Tokyo 113-0033, Japan

<sup>b</sup> Department of Applied Chemistry, Graduate School of Engineering, Osaka University, Osaka 565-0871, Japan

<sup>c</sup> Department of Life and Coordination-Complex Molecular Science, Institute for Molecular Science (IMS), 5-1 Higashiyama, Myodaiji, Okazaki, Aichi 444-8787, Japan

Contents

1. General Method
2. General Procedure for C–H hydroxyalkylation of *N*-heteroaromatics
3. Procedure for Deuterium Labeling Experiments (for Aldehyde)
4. Procedure for Deuterium Labeling Experiments (for TFA)
5. Quantum yield analysis
6. Emission Spectroscopy and Stern-Volmer Analysis
7. Synthesis of Substrates
8. Characterization of Target Compounds
9. References
10. NMR Charts

## 1. General Method

$^1\text{H}$  NMR spectra were recorded on JEOL ECX500 (500 MHz for  $^1\text{H}$  NMR and 125.65 MHz for  $^{13}\text{C}$  NMR), and JEOL ECS400 (400 MHz for  $^1\text{H}$  NMR, 100 MHz for  $^{13}\text{C}$  NMR and 370 MHz for  $^{19}\text{F}$  NMR) spectrometer. For  $^1\text{H}$  NMR and  $^{13}\text{C}$  NMR, chemical shifts were reported in the scale relative to  $\text{CHCl}_3$  ( $\delta = 7.24$  for  $^1\text{H}$  NMR) or  $\text{CDCl}_3$  ( $\delta = 77.0$  for  $^{13}\text{C}$  NMR), used as an internal reference. For  $^{19}\text{F}$  NMR, chemical shifts were reported relative to hexafluorobenzene ( $\delta = -164.90$  ppm) as an external reference. Electrospray ionization (ESI)-mass spectra were measured on a JEOL JMS-T100LC AccuTOF spectrometer for HRMS. Infrared (IR) spectra were recorded on a JASCO FT/IR 410 Fourier transform infrared spectrophotometer. Column chromatographies were performed with silica gel Merck 60 (230-400 mesh ASTM), Biotage Isolera One and Biotage SNAP Ultra, or Yamazen Smart Flash and Universal Column Premium. All non-commercially available compounds were prepared and characterized as described in Section 6 of this SI. Other reagents were purchased from Aldrich, Tokyo Chemical Industry Co., Ltd. (TCI), Kanto Chemical Co., Inc., and Wako Pure Chemical Industries, Ltd., and were used as received. A Valore VBP-L24-C2 with 38W LED lamp (VBL-SE150-BBB(430)) was used as the blue LED light source. Emission Spectroscopy and Stern-Volmer Analysis (section 6) were conducted at ambient temperature, 20  $^\circ\text{C}$ , under an Ar atmosphere. Emission spectra were recorded on a SHIMADZU RF-5300PC with a conventional quartz cuvette (path length,  $l = 1$  cm). UV-Vis absorption spectra were recorded on a Shimadzu UV-3600 UV-Vis-NIR spectrophotometer.

## 2. General Procedure for C–H hydroxyalkylation of *N*-heteroaromatics

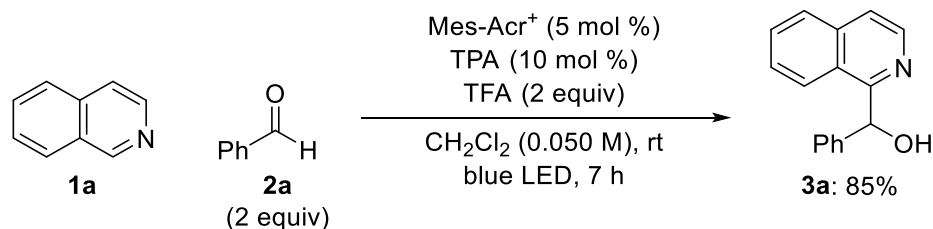

Isoquinoline (**1a**) (12.9 mg, 0.10 mmol), benzaldehyde (**2a**) (20.4  $\mu\text{L}$ , 0.20 mmol), Mes-Acr<sup>+</sup> (2.0 mg, 0.005 mmol), TPA (3.6 mg, 0.010 mmol), and TFA (15.3  $\mu\text{L}$ , 0.20 mmol) were dissolved in degassed  $\text{CH}_2\text{Cl}_2$  (2.0 mL) in a screw-capped vial under argon atmosphere. The vial was subjected to blue LED irradiation for 7 hours under temperature control (ca. 27–29  $^\circ\text{C}$ ). Then, the reaction mixture was passed through a pad of alumina eluting with  $\text{CH}_2\text{Cl}_2$  and EtOAc. The crude material was purified by a  $\text{SiO}_2$  flash column chromatography with EtOAc and *n*-hexane to afford **3a** (20.0 mg, 0.085 mmol) in 85% yield as white solids.

## 3. Procedure for Deuterium Labeling Experiments (for Aldehyde)

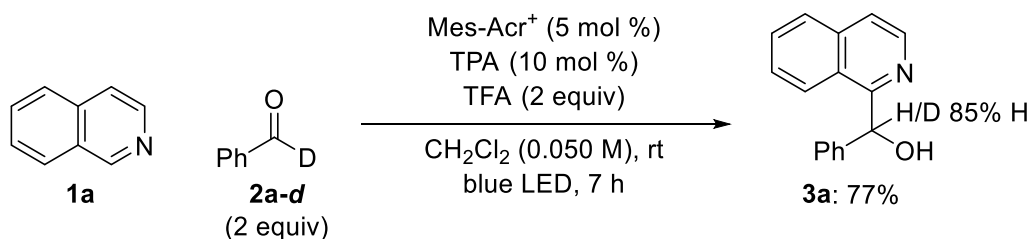

Isoquinoline (**1a**) (12.9 mg, 0.10 mmol), benzaldehyde- $\alpha$ -d (**2a-d**) (20.3  $\mu\text{L}$ , 0.20 mmol), Mes-Acr<sup>+</sup> (2.0 mg, 0.005 mmol), TPA (3.6 mg, 0.010 mmol), and TFA (15.3  $\mu\text{L}$ , 0.20 mmol) were dissolved in degassed  $\text{CH}_2\text{Cl}_2$  (2.0 mL)

in a screw-capped vial under argon atmosphere. The vial was subjected to blue LED irradiation for 7 hours under temperature control (ca. 27–29 °C). Then, the reaction mixture was passed through a pad of alumina eluting with CH<sub>2</sub>Cl<sub>2</sub> and EtOAc. Then, the solvent was removed under reduced pressure, and 1,1,2,2-tetrachloroethane was added to the crude mixture as an internal standard. Yield of **3a** was determined to be 77% based on the <sup>1</sup>H NMR analysis. The incorporation ratio of benzylic proton was determined by the relative integration value of the H (see the NMR chart below).

#### 4. Procedure for Deuterium Labeling Experiments (for TFA)

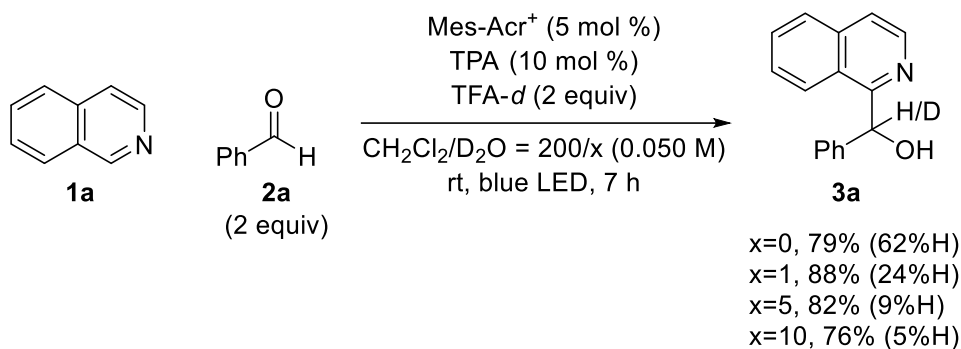

Isoquinoline (**1a**) (12.9 mg, 0.10 mmol), benzaldehyde (**2a**) (20.4 μL, 0.20 mmol), Mes-Acr<sup>+</sup> (2.0 mg, 0.005 mmol), TPA (3.6 mg, 0.010 mmol), and TFA-*d* (15.3 μL, 0.20 mmol) were dissolved in degassed CH<sub>2</sub>Cl<sub>2</sub> (2.0 mL) in a screw-capped vial under argon atmosphere. D<sub>2</sub>O (10 μL, 50 μL, 100 μL, (*x*=1, 5, 10, respectively)) was added and argon was flashed to the reaction mixture. The vial was subjected to blue LED irradiation for 7 hours under temperature control (ca. 27–29 °C). Then, the reaction mixture was passed through a pad of alumina eluting with CH<sub>2</sub>Cl<sub>2</sub> and EtOAc. Then, the solvent was removed under reduced pressure, and 1,1,2,2-tetrachloroethane was added to the crude mixture as an internal standard. Yield of **3a** was determined to be 79%, 88%, 82%, 76% (*x*=0, 1, 5, 10 respectively) based on the <sup>1</sup>H NMR analysis. The incorporation ratio of benzylic proton was determined by the relative integration value of the H (see the NMR chart below).

Benzaldehyde- $\alpha$ - $d$  as an aldehyde

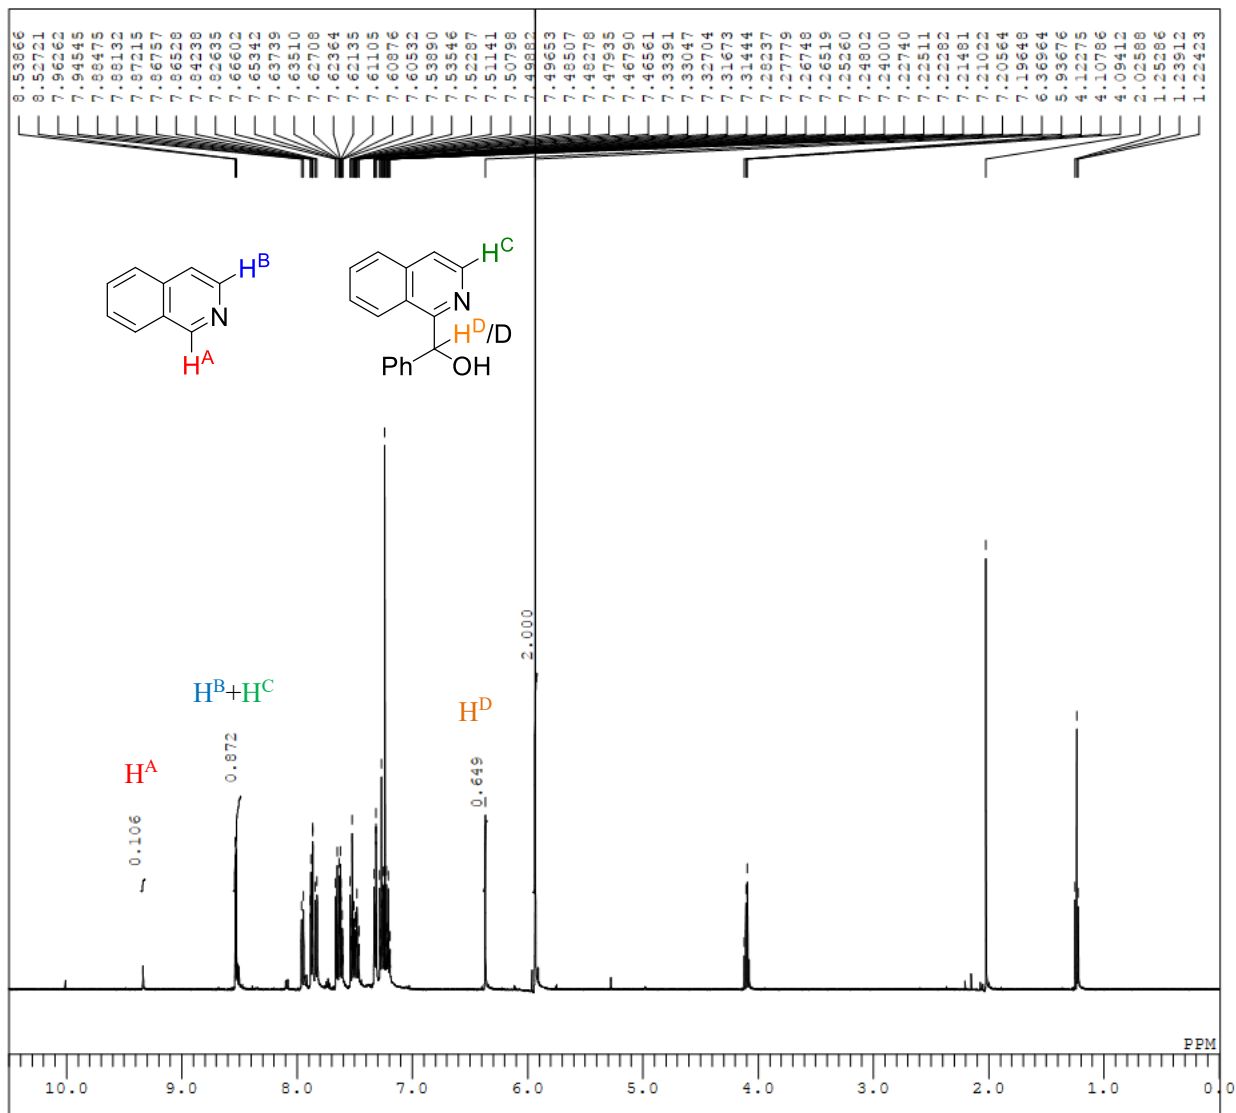

TFA-*d* as a proton source

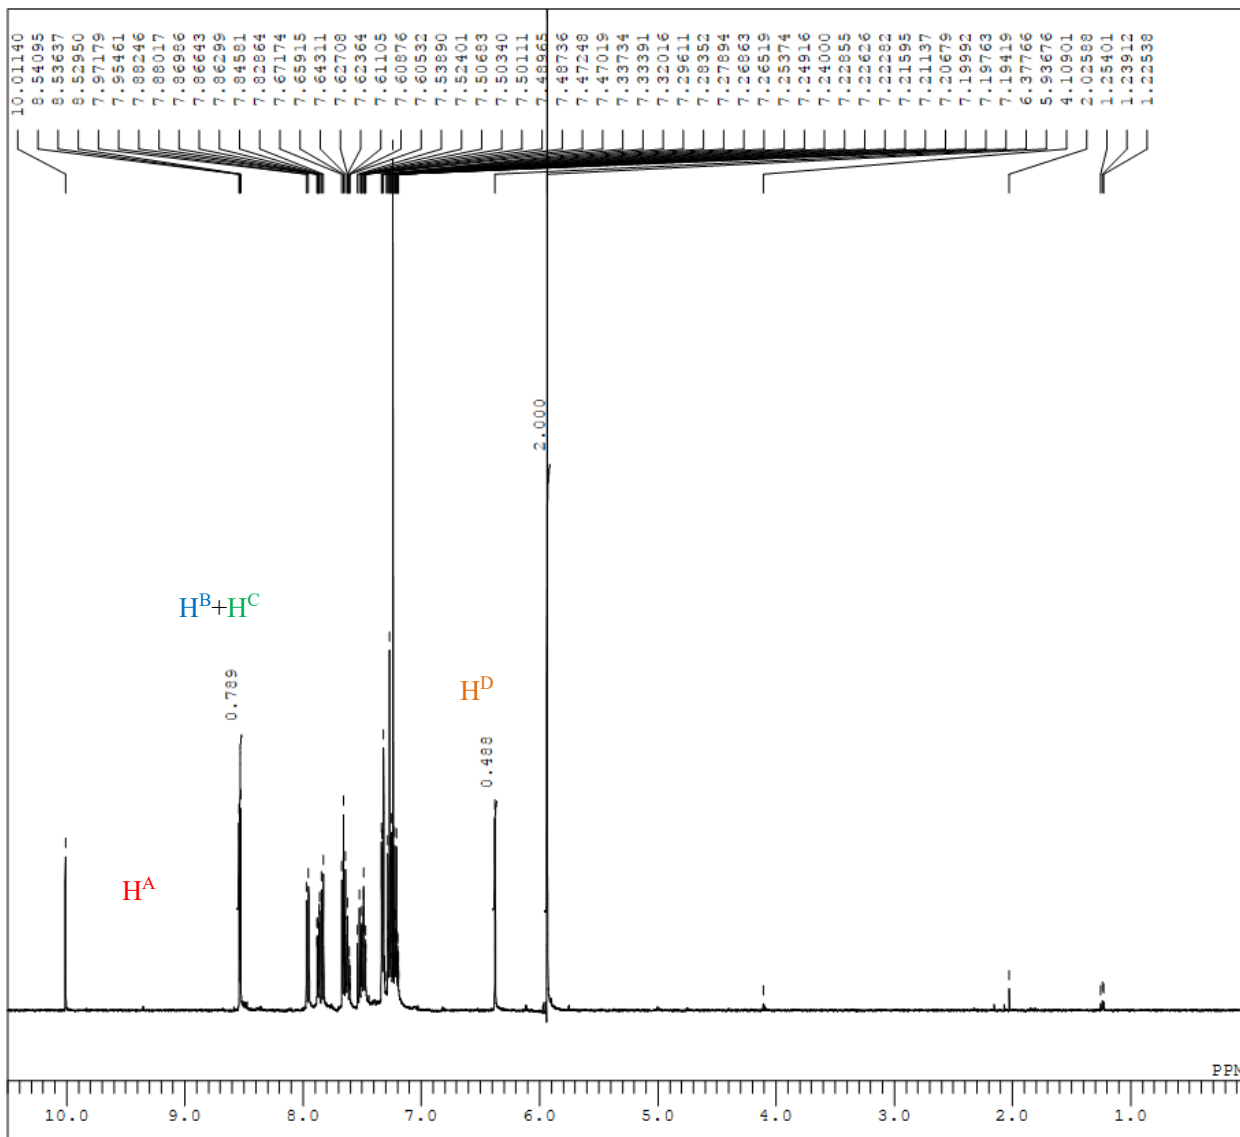

TFA-*d* and D<sub>2</sub>O (10 μL) as a proton source

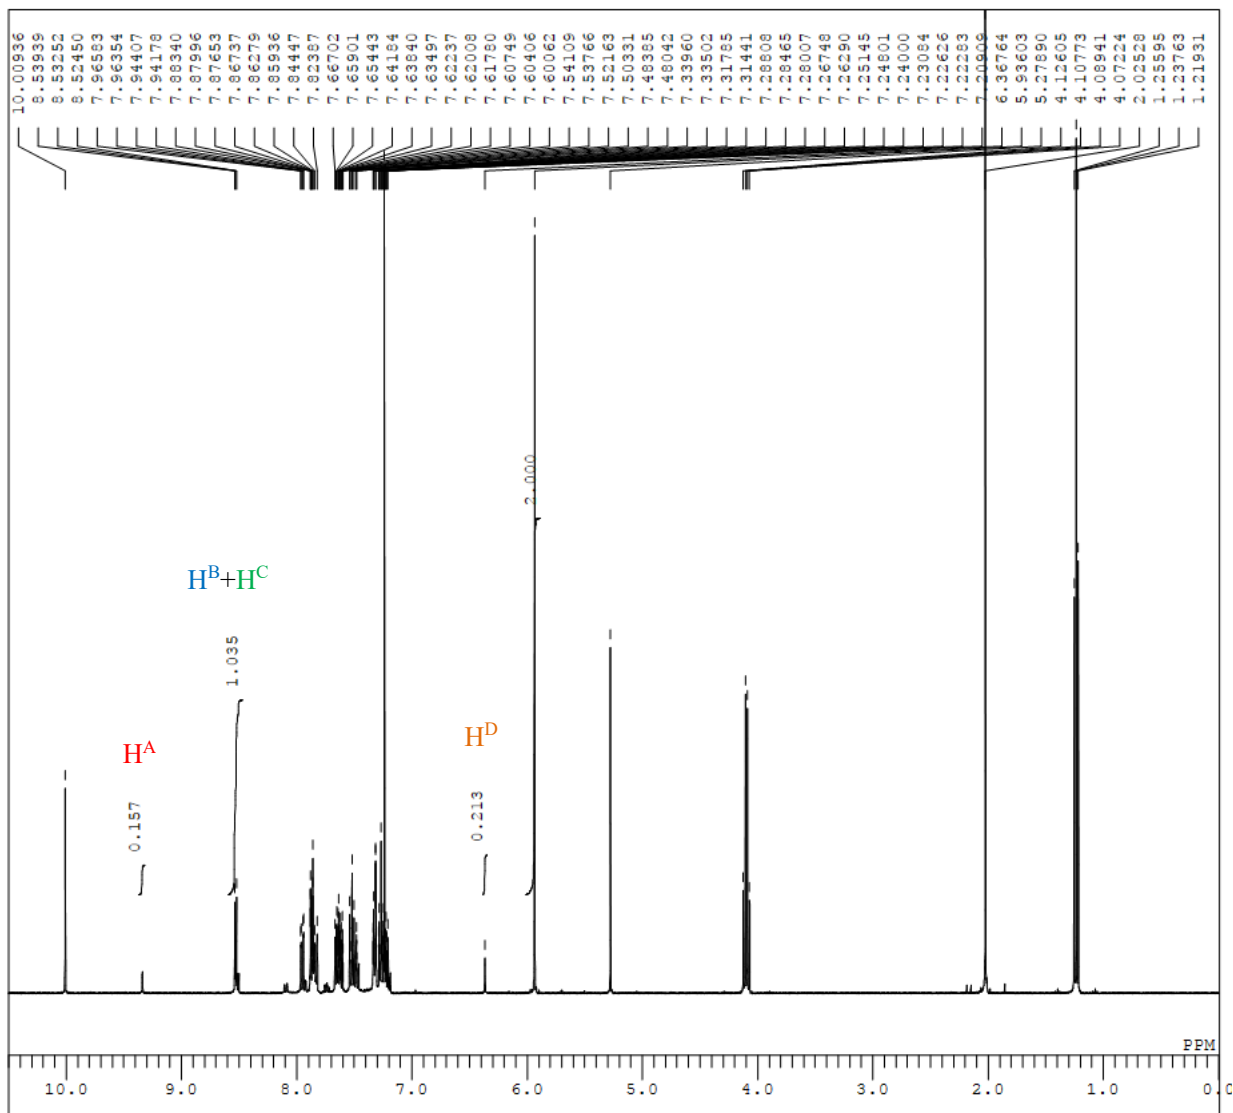

TFA-*d* and D<sub>2</sub>O (50 μL) as a proton source

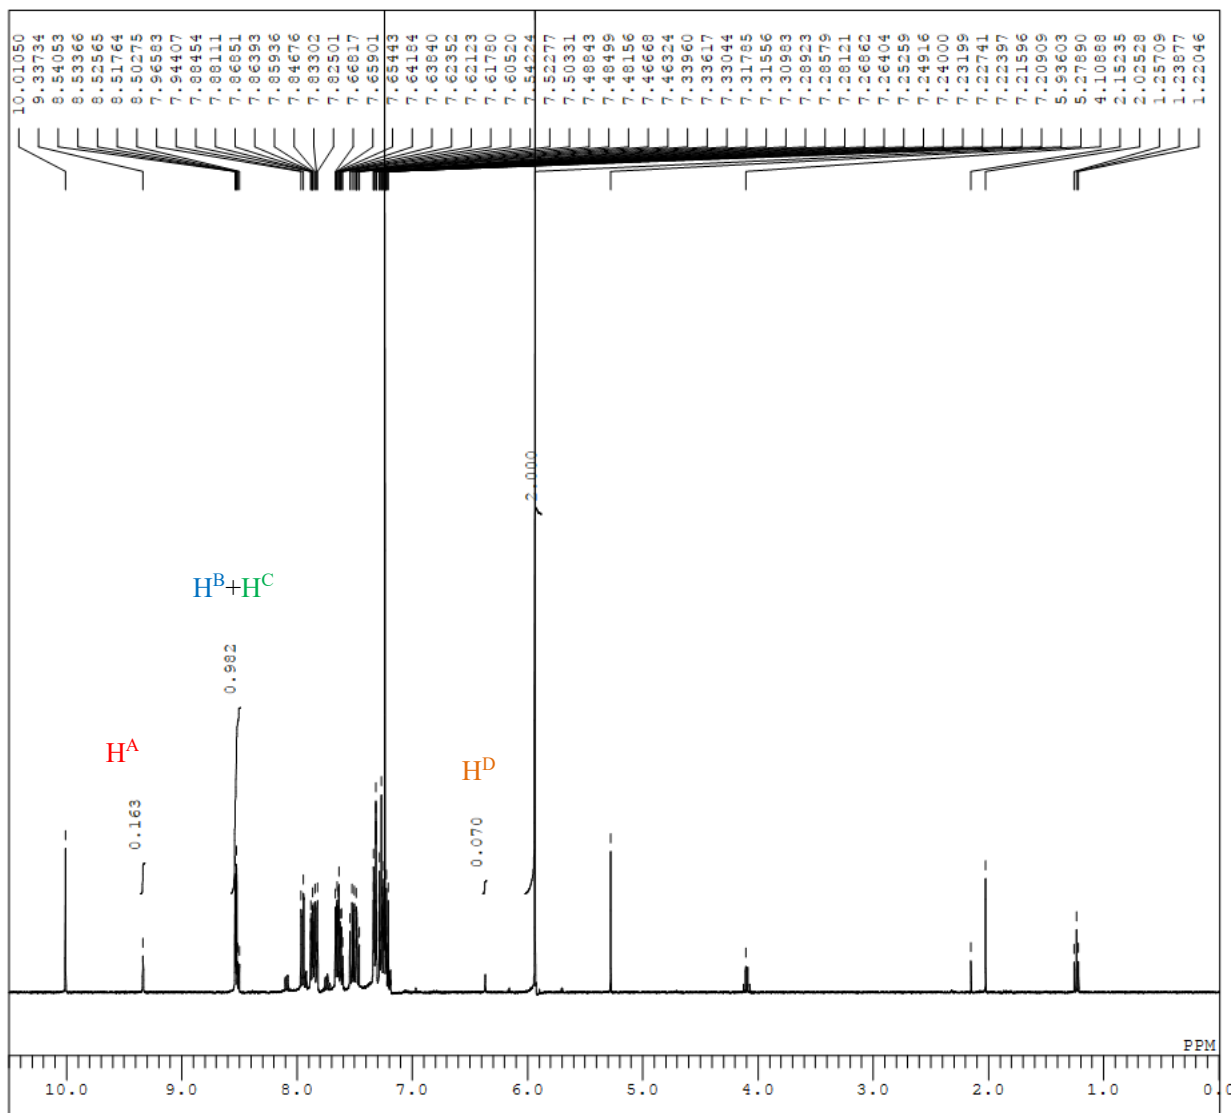

TFA-*d* and D<sub>2</sub>O (100 μL) as a proton source

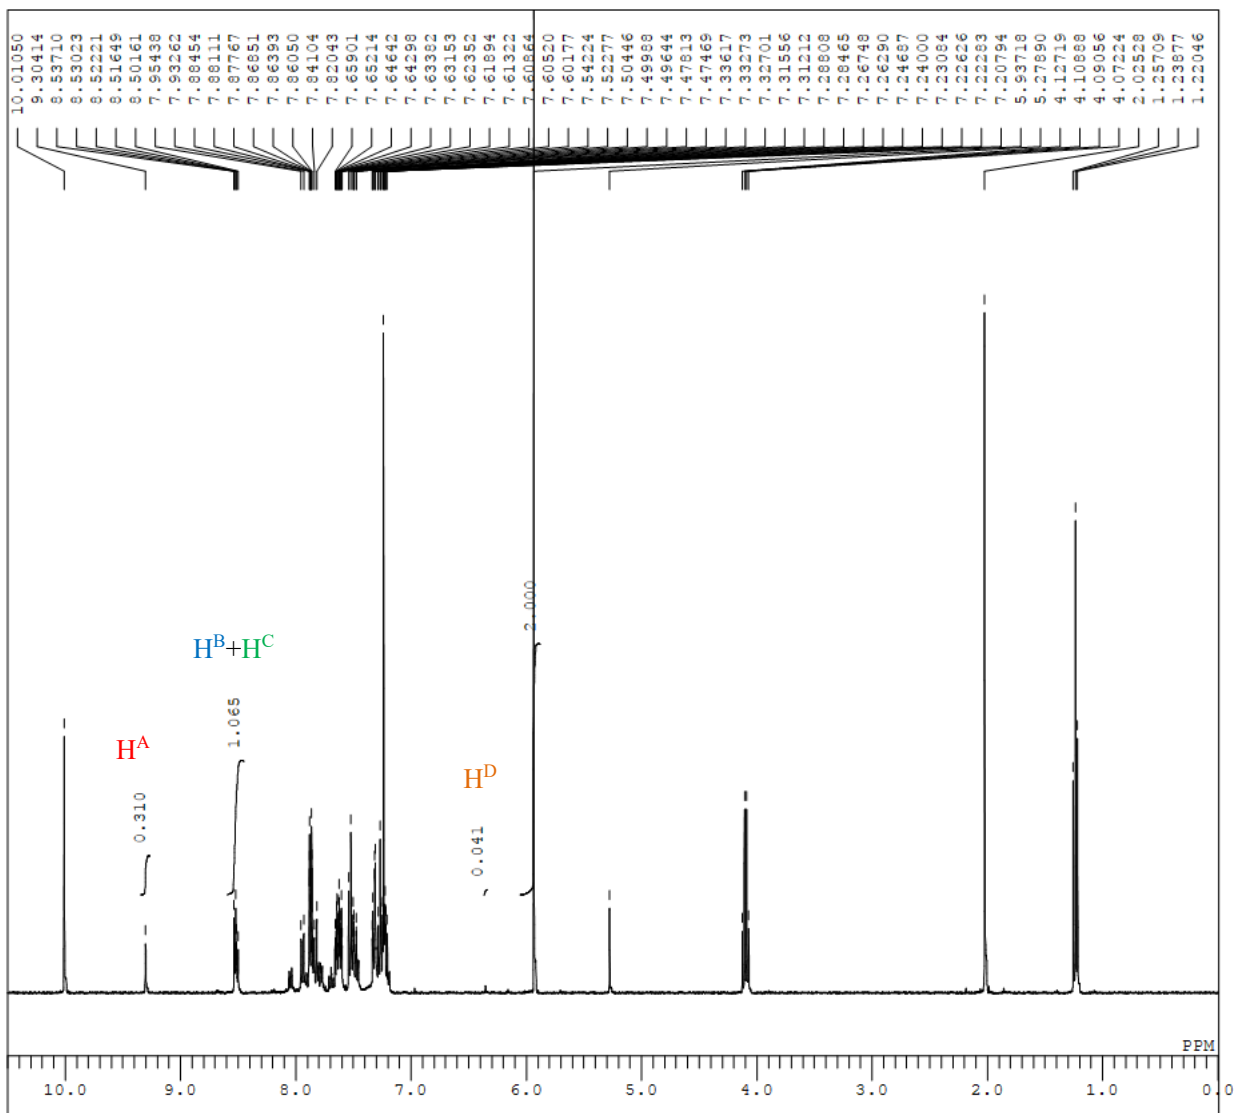



## 5. Quantum yield analysis

According to the procedure of Shang and Fu (*Science*, **2019**, 363, 1429.) and Yoon (*Chem. Sci.* **2015**, 6, 5426.), the quantum yield of the reaction was measured by chemical actinometry using potassium ferrioxalate.

### (5-A) UV-vis Absorption Spectroscopy

The absorbance of Mes-Acr<sup>+</sup> was measured at the reaction concentration ( $2.5 \times 10^{-3}$  M). The absorbance at 430 nm is >3 indicating the fraction of light ( $f_R$ ) absorbed is >0.999.

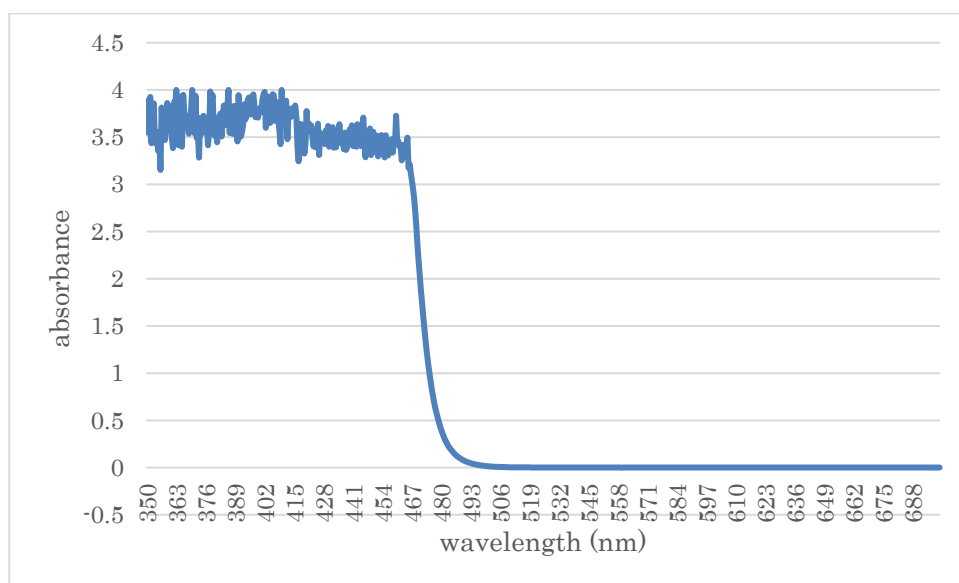

### (5-B) photon flux

The actinometer solution was prepared by dissolving 0.737 g of potassium ferrioxalate trihydrate in 10 mL H<sub>2</sub>SO<sub>4</sub> (0.05 M) and stored in the dark. The buffer solution was prepared by dissolving 2.5 g of sodium acetate and 0.5 mL of H<sub>2</sub>SO<sub>4</sub> (95%) in 50 mL of distilled water.

To a screw-capped vial, 1 mL of the actinometer solution was added. After 430 nm blue LED irradiation for 60 sec, 50  $\mu$ L of this solution was added to a 5 mL volumetric flask containing 15 mg of 1,10-phenanthroline in 3 mL of the buffer solution. Then, the flask was filled with distilled H<sub>2</sub>O. The absorbance at 510 nm of this solution was measured by UV-vis absorption spectroscopy. This procedure is repeated for the non-irradiated sample. According to Lambert-Beer law, the conversion to Fe<sup>2+</sup> was determined using the equation described below where  $v_1$  is the volume of the irradiated sample (1 mL),  $v_2$  is the volume of the solution taken from irradiated samples for determination about Fe<sup>2+</sup> (0.050 mL),  $v_3$  is the volume of the solution after complexation with 1,10-phenanthroline (5 mL),  $\Delta A(510 \text{ nm})$  is the difference about the absorbance between irradiated and non-irradiated samples (2.802),  $l$  is the optical path-length (1 cm), and  $\epsilon(510 \text{ nm})$  is molar extinction coefficient of [Fe(phen)<sub>3</sub>]<sup>2+</sup> (11100 L mol<sup>-1</sup> cm<sup>-1</sup>).

$$\text{Fe}^{2+} = \frac{v_1 \cdot v_3 \cdot \Delta A(510 \text{ nm})}{10^3 \cdot v_2 \cdot l \cdot \epsilon(510 \text{ nm})}$$

The photon flux ( $\Phi_q$ ) was determined using the equation described below where  $\Phi(430 \text{ nm})$  is the quantum yield for the ferrioxalate actinometer at 430 nm (1.01),  $t$  is irradiation time (60 sec),  $f$  is the fraction of absorbed light ( $f$

$= 1 - 10^{-A(430 \text{ nm})} > 0.999$  where  $A(430 \text{ nm})$  was observed as 3.057). The photon flux ( $\Phi_q$ ) was determined as  $4.17 \times 10^{-7}$  einstein  $\text{sec}^{-1}$ .

$$\Phi_q = \frac{\text{Fe}^{2+}}{\Phi(430 \text{ nm}) \cdot t \cdot f}$$

### (5-C) reaction quantum yield

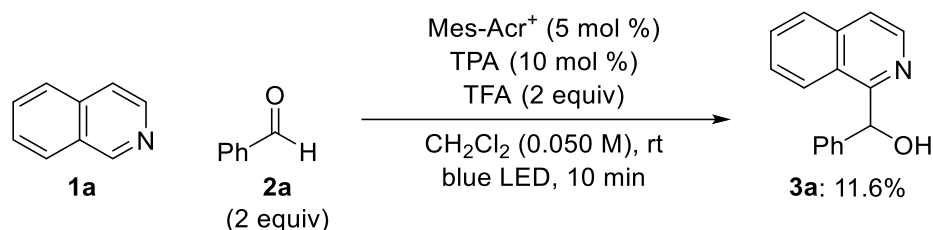

Isoquinoline (**1a**) (12.9 mg, 0.10 mmol), benzaldehyde (**2a**) (20.4  $\mu\text{L}$ , 0.20 mmol), Mes-Acr<sup>+</sup> (2.0 mg, 0.005 mmol), TPA (3.6 mg, 0.010 mmol), and TFA (15.3  $\mu\text{L}$ , 0.20 mmol) were dissolved in degassed  $\text{CH}_2\text{Cl}_2$  (2.0 mL) in a screw-capped vial under argon atmosphere. The vial was subjected to 430 nm blue LED irradiation for 10 minutes under temperature control (ca. 27–29 °C). Then, the reaction mixture was passed through a pad of alumina eluting with  $\text{CH}_2\text{Cl}_2$  and EtOAc. Then, the solvent was removed under reduced pressure, and 1,1,2,2-tetrachloroethane was added to the crude mixture as an internal standard. Yield of **3a** was determined to be 11.6% ( $1.16 \times 10^{-5}$  mol) based on the  $^1\text{H}$  NMR analysis.

The reaction quantum yield ( $\Phi_R$ ) was determined using the equation described below where the photon flux ( $\Phi_q$ ) is  $4.17 \times 10^{-7}$  (einsteins  $\text{sec}^{-1}$ ) (determined by actinometry),  $n$  (*product*) is the yield of the product ( $1.16 \times 10^{-5}$  mol),  $t$  is the reaction time (600 sec) and the fraction of incident light absorbed by the photocatalyst ( $f_R$ ) is  $>0.999$ . The reaction quantum yield ( $\Phi_R$ ) was determined as 0.046, which suggests the closed catalytic cycle.

$$\Phi_R = \frac{n(\text{product})}{\Phi_q \cdot t \cdot f_R}$$

## 6. Emission Spectroscopy and Stern-Volmer Analysis

Emission spectra of deaerated 1,2-dichloroethane (DCE) solutions of Mes-Acr<sup>+</sup> (0.05 mM) in the presence of organocatalyst TPA (0.25-1.0 mM) were measured with the excitation wavelength of 430 nm (Figure S1). Note that UV-Vis absorption spectra measured before and after the measurement of emission spectroscopy were identical in all cases, suggesting that no degradation of Mes-Acr<sup>+</sup> occurred during the measurements. In the presence of TPA, the decrease in emission intensity was observed.

We also conducted Stern-Volmer analysis of the obtained emission spectra according to the following equation:

$$I^0/I = 1 + K_{SV}[Q] = 1 + k_q I^0 [Q]$$

where  $I^0$  and  $I$  are the fluorescence intensity in the absence and presence of the quencher (Q),  $K_{SV}$  is the Stern-Volmer constant,  $k_q$  is the bimolecular quenching constant, and  $[Q]$  is the concentration of the quencher.  $K_{SV}$  was estimated from the slope of a plot of  $I^0/I$  against  $[Q]$  (Figure S2). The decay of the emission intensity depended on the concentration of quencher TPA, and we observed the significant Stern-Volmer constant of 0.14 along with quencher rate constant  $k_q$  of 0.028 (Figure S2).

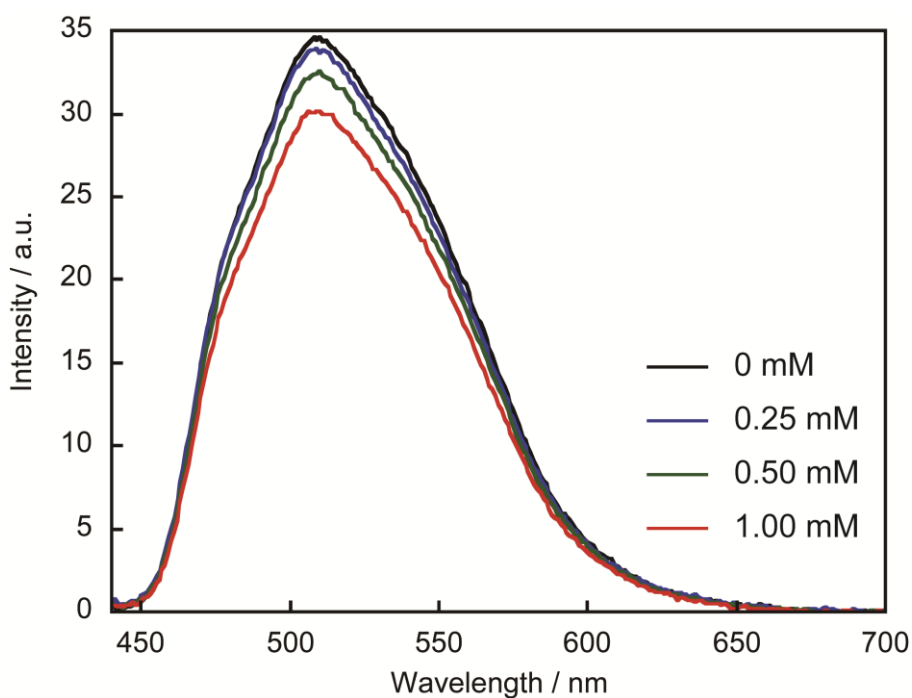

Figure S1. The emission spectra of photoredox catalyst Mes-Acr<sup>+</sup> (0.05 mM) in DCE in the presence of organocatalyst TPA (0, 0.25, 0.50, and 1.00 mM) at the excitation wavelength of 430 nm.

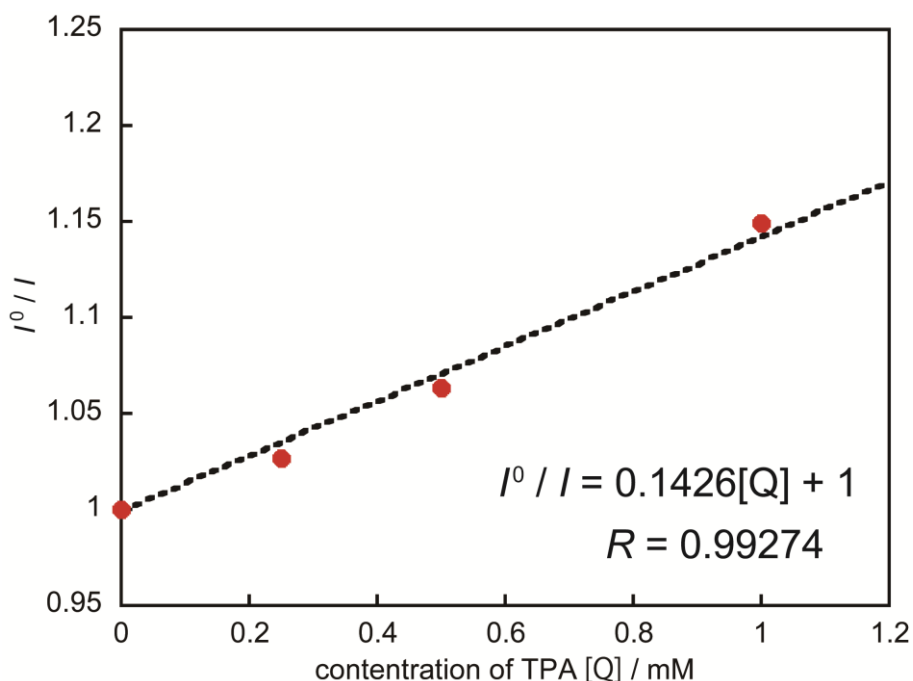

Figure S2. A Stern-Volmer plot of Mes-Acr<sup>+</sup> (0.05 mM) in DCE in the presence of the quencher (Q), organocatalyst TPA. The Stern-Volmer quenching constant,  $K_{SV}$ , was determined from the slope of the linear fitting function, where the bimolecular quenching constant,  $k_q$ , is equal to  $K_{SV}/I^0$ .

In addition, Glorius and co-workers already reported that there was no reaction between 4-fluorobenzaldehyde and the excited state of Mes-Acr<sup>+</sup> by Stern-Volmer analysis (*J. Am. Chem. Soc.* **2017**, *139*, 13652.). Therefore, the thiyl radical (RS<sup>•</sup>) was assumed to be generated from the organocatalyst TPA through a single electron oxidation by the excited state of Mes-Acr<sup>+</sup>.

## 7. Syntheses of Substrates

Compounds **1af**<sup>1</sup> and **2i–2l**<sup>2</sup> were prepared as reported previously.

### (7-A) Synthesis of **1r**

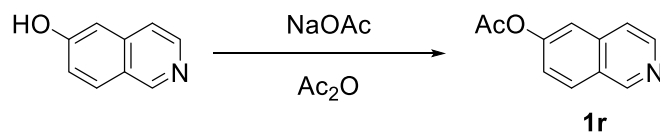

A solution of isoquinolin-6-ol (290 mg, 2 mmol) and sodium acetate (15 mg, 0.18 mmol) in acetic anhydride (1.21 mL, 2.9 mmol) was stirred at room temperature. After 17 hours of stirring, the reaction was quenched with water. The water phase was extracted with CH<sub>2</sub>Cl<sub>2</sub> three times. The combined organic layer was dried over Na<sub>2</sub>SO<sub>4</sub>, filtered, and concentrated under reduced pressure. The crude material was purified by a SiO<sub>2</sub> flash column chromatography with EtOAc/*n*-hexane (1/3 to 3/1, v/v) to afford **1r** (186 mg, 0.99 mmol) in 50% yield as white solid.

### isoquinolin-6-yl acetate (**1r**)

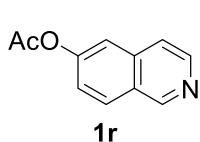

<sup>1</sup>H NMR (CDCl<sub>3</sub>): δ = 9.23 (1H, s), 8.50 (1H, d,  $J = 5.7$  Hz), 7.99 (1H, d,  $J = 8.6$  Hz), 7.62 (1H, d,  $J = 5.7$  Hz), 7.55 (1H, d,  $J = 2.3$  Hz), 7.34 (1H, d,  $J = 8.6, 2.3$  Hz), 2.35 (3H, s);

$^{13}\text{C}$  NMR ( $\text{CDCl}_3$ ):  $\delta = 169.05, 151.88, 151.82, 143.12, 136.68, 129.55, 126.58, 122.89, 120.45, 117.32, 21.17$ .; HRMS (ESI):  $m/z$  calcd for  $\text{C}_{11}\text{H}_9\text{NO}_2\text{Na}$   $[\text{M}+\text{Na}]^+$  210.0525. Found 210.0526; IR (neat): 2931, 1755, 1372, 1208, 822  $\text{cm}^{-1}$ .

### (7-B) Synthesis of **1ac**

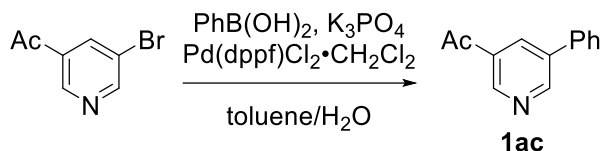

A solution of 1-(5-bromopyridin-3-yl)ethan-1-one (400 mg, 2 mmol),  $\text{PhB(OH)}_2$  (488 mg, 4 mmol) and  $\text{Pd(dppf)Cl}_2\cdot\text{CH}_2\text{Cl}_2$  (49.0 mg, 0.06 mmol) in toluene (36 mL) was heated at 100 °C. To the mixture, a solution of  $\text{K}_3\text{PO}_4$  (1.70 g, 8 mmol) in  $\text{H}_2\text{O}$  (4 ml) was added. The reaction mixture was stirred at 100 °C for 14 hours. After cooled to room temperature, the reaction was quenched with 1 M HCl aqueous solution. The water phase was extracted with  $\text{CH}_2\text{Cl}_2$  three times. The combined organic layer was dried over  $\text{Na}_2\text{SO}_4$ , filtered, and concentrated under reduced pressure. The crude material was purified by a  $\text{SiO}_2$  flash column chromatography with  $\text{EtOAc}/n$ -hexane (1/9 to 1/2, v/v) to afford **1ac** (322 mg, 1.63 mmol) in 82% yield as pale brown solid.

### 1-(5-phenylpyridin-3-yl)ethan-1-one (**1ac**)

$^1\text{H}$  NMR ( $\text{CDCl}_3$ ):  $\delta = 9.10$  (1H, d,  $J = 2.0$  Hz), 8.99 (1H, d,  $J = 2.3$  Hz), 8.39 (1H, dd,  $J = 2.3, 2.0$  Hz), 7.62-7.57 (2H, m), 7.52-7.45 (2H, m), 7.45-7.39 (1H, m), 2.67 (3H, s);  $^{13}\text{C}$  NMR ( $\text{CDCl}_3$ ):  $\delta = 196.71, 151.94, 148.45, 136.77, 136.65, 133.53, 132.17, 129.21, 128.62, 127.18, 26.89$ .; HRMS (ESI):  $m/z$  calcd for  $\text{C}_{13}\text{H}_{11}\text{NONa}$   $[\text{M}+\text{Na}]^+$  220.0733. Found 220.0744; IR (neat): 1690, 1434, 1239, 763  $\text{cm}^{-1}$ .

### (7-C) Synthesis of **2ag**

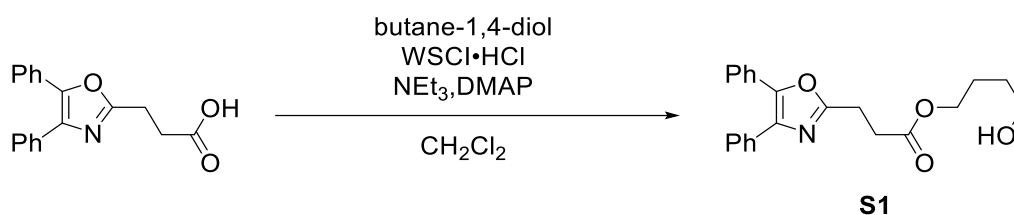

To a solution of butane-1,4-diol (2.39 mL, 27 mmol),  $\text{WSCI}\cdot\text{HCl}$  (3.45 g, 18 mmol), oxaprozin (2.64 g, 9.0 mmol), and DMAP (222 mg, 1.8 mmol) in  $\text{CH}_2\text{Cl}_2$  (30 mL),  $\text{NEt}_3$  (3.78 mL, 27 mmol) was added. After 19 hours of stirring at room temperature, 1 M HCl aqueous solution was added and the water phase was extracted with  $\text{CH}_2\text{Cl}_2$  three times. The combined organic layer was washed by saturated  $\text{NaHCO}_3$  aqueous solution, dried over  $\text{Na}_2\text{SO}_4$ , filtered, and concentrated under reduced pressure. The crude material was purified by a  $\text{SiO}_2$  flash column chromatography with  $\text{EtOAc}/n$ -hexane (1/19 to 3/2, v/v) as an eluent twice to afford **S1** (2.51 g, 6.87 mmol) in 76% yield as white solid.

### 4-hydroxybutyl 3-(4,5-diphenyloxazol-2-yl)propanoate (**S1**)

$^1\text{H}$  NMR ( $\text{CDCl}_3$ ):  $\delta = 7.66$ -7.50 (4H, m), 7.38-7.25 (6H, m), 4.13 (2H, t,  $J = 6.6$  Hz).  
**S1**

Hz), 3.56 (2H, t,  $J = 6.3$  Hz), 3.16 (2H, t,  $J = 7.4$  Hz), 2.89 (2H, t,  $J = 7.4$  Hz), 2.09 (1H, s), 1.74-1.61 (2H, m), 1.61-1.46 (2H, m);  $^{13}\text{C}$  NMR ( $\text{CDCl}_3$ ):  $\delta = 171.95, 161.74, 145.34, 134.93, 132.23, 128.77, 128.55, 128.47, 128.40, 128.02, 127.80, 126.34, 64.59, 62.00, 31.04, 28.95, 24.98, 23.44$ .; HRMS (ESI):  $m/z$  calcd for  $\text{C}_{22}\text{H}_{23}\text{NO}_4\text{Na}$   $[\text{M}+\text{Na}]^+$  388.1519. Found 388.1508; IR (Neat): 3395, 2945, 1734, 1571, 1445, 1177, 765  $\text{cm}^{-1}$

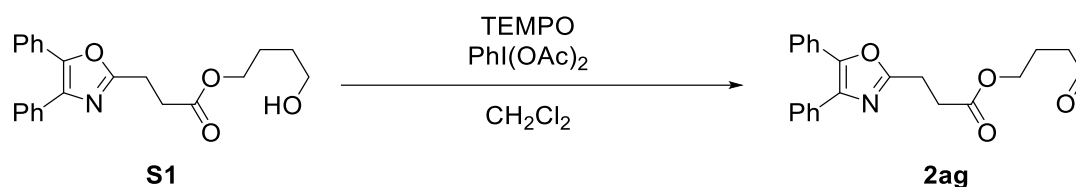

To a solution of **S1** (731 mg, 2.0 mmol) and TEMPO (32 mg, 0.20 mmol) in  $\text{CH}_2\text{Cl}_2$  (2.0 mL),  $\text{PhI}(\text{OAc})_2$  (708 mg, 2.2 mmol) was added. After 5 hours of stirring, the reaction was quenched with saturated  $\text{Na}_2\text{S}_2\text{O}_3$  aqueous solution. The water phase was extracted with  $\text{CH}_2\text{Cl}_2$  three times. The combined organic layer was washed by saturated  $\text{NaHCO}_3$  aqueous solution and brine, dried over  $\text{Na}_2\text{SO}_4$ , filtered, and concentrated under reduced pressure. The crude material was purified by a  $\text{SiO}_2$  flash column chromatography with  $\text{EtOAc}/n$ -hexane (1/19 to 2/3, v/v) to afford **2ag** (549 mg, 1.51 mmol) in 76% yield as colorless oil.

#### 4-oxobutyl 3-(4,5-diphenyloxazol-2-yl)propanoate (**2ag**)

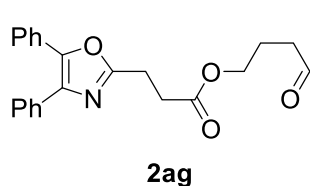

$^1\text{H}$  NMR ( $\text{CDCl}_3$ ):  $\delta = 9.66$  (1H, s), 7.67-7.48 (4H, m), 7.39-7.25 (6H, m), 4.15 (2H, t,  $J = 6.3$  Hz), 3.17 (2H, t,  $J = 7.3$  Hz), 2.89 (2H, t,  $J = 7.3$  Hz), 2.49 (2H, dt,  $J = 7.2, 1.1$  Hz), 1.95 (2H, dt,  $J = 7.2, 6.3$  Hz);  $^{13}\text{C}$  NMR ( $\text{CDCl}_3$ ):  $\delta = 201.10, 171.89, 161.69, 145.44, 135.01, 132.30, 128.86, 128.64, 128.55, 128.50, 128.10, 127.85, 126.44, 63.69, 40.37, 31.00, 23.45, 21.23$ .; HRMS (ESI):  $m/z$  calcd for  $\text{C}_{22}\text{H}_{21}\text{NO}_4\text{Na}$   $[\text{M}+\text{Na}]^+$  386.1363. Found 386.1354; IR (Neat): 2960, 1735, 1571, 1444, 1168, 765  $\text{cm}^{-1}$

#### (7-D) Synthesis of **2ah**

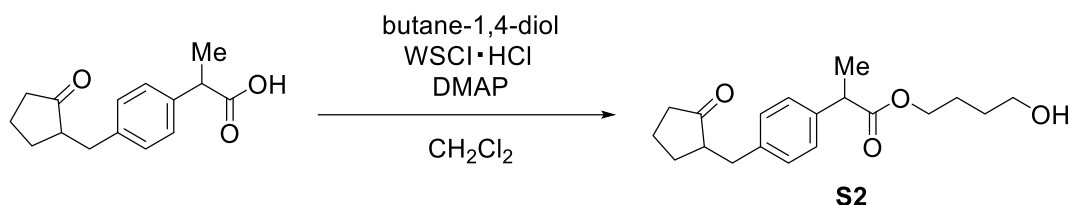

To a solution of butane-1,4-diol (542  $\mu\text{L}$ , 6.09 mmol),  $\text{WSCI}\cdot\text{HCl}$  (467 mg, 2.44 mmol), and DMAP (24.8 mg, 0.23 mmol) in  $\text{CH}_2\text{Cl}_2$  (6 mL), loxoprofen was added (500 mg, 2.03 mmol). After overnight of stirring at room temperature, 1 M  $\text{HCl}$  aqueous solution was added and the water phase was extracted with  $\text{CH}_2\text{Cl}_2$  three times. The combined organic layers were washed with saturated  $\text{NaHCO}_3$  aqueous solution, dried over  $\text{Na}_2\text{SO}_4$ , filtered, and concentrated under reduced pressure. The crude material was purified by a  $\text{SiO}_2$  flash column chromatography ( $\text{EtOAc}/n$ -hexane = 1/3, v/v) to afford **S2** (555 mg, 1.74 mmol) in 86% yield as colorless oil.

#### 4-hydroxybutyl 2-(4-((2-oxocyclopentyl)methyl)phenyl)propanoate (**S2**)

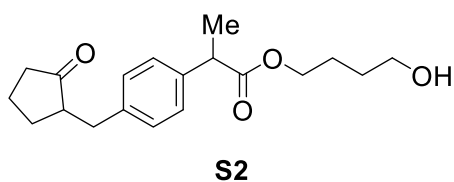

**S2**

$^1\text{H NMR}$  ( $\text{CDCl}_3$ ):  $\delta$  = 7.18 (2H, d,  $J$  = 8.0 Hz), 7.08 (2H, d,  $J$  = 8.0 Hz), 4.05 (2H, t,  $J$  = 6.6 Hz), 3.65 (1H, q,  $J$  = 7.3 Hz), 3.56 (2H, t,  $J$  = 6.4 Hz), 3.07 (1H, dd,  $J$  = 14.0, 4.4 Hz), 2.56-2.41 (1H, m), 2.37-2.21 (2H, m), 2.12-2.00 (2H, m), 1.98-1.86 (1H, m), 1.79-1.59 (4H, m), 1.57-1.40 (5H, m);  $^{13}\text{C NMR}$  ( $\text{CDCl}_3$ ):  $\delta$  = 220.21, 174.58, 160.79,

140.30, 138.72, 138.33, 136.42, 130.30, 128.99, 127.57, 127.44, 127.38, 124.62, 123.92, 120.57, 77.26, 76.74, 68.92, 64.50, 50.93, 45.10, 45.07, 38.13, 35.26, 35.20, 35.13, 29.16, 24.68, 20.48, 18.43, 18.35.; HRMS (ESI):  $m/z$  calcd for  $\text{C}_{19}\text{H}_{26}\text{O}_4\text{Na}$   $[\text{M}+\text{Na}]^+$  341.1723. Found 341.1709; IR (Neat): 3449, 2938, 1732, 1512, 1453, 1203, 1164, 860  $\text{cm}^{-1}$

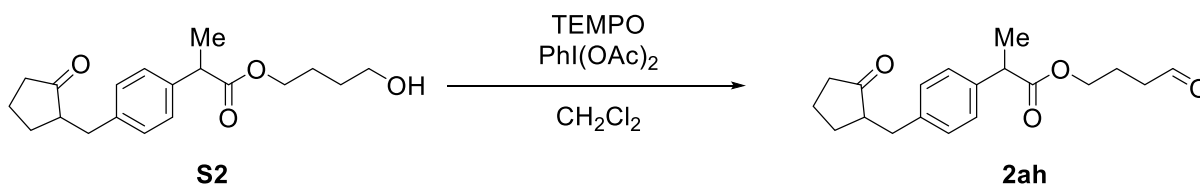

**S2**

**2ah**

To a solution of **S2** (352 mg, 1.1 mmol) and TEMPO (17.3 mg, 0.11 mmol) in  $\text{CH}_2\text{Cl}_2$  (1.0 mL),  $\text{PhI}(\text{OAc})_2$  (392 mg, 1.22 mmol) was added. After 19 hours of stirring, the reaction was quenched with saturated  $\text{Na}_2\text{S}_2\text{O}_3$  aqueous solution. The water phase was extracted with  $\text{CH}_2\text{Cl}_2$  three times. The combined organic layer was washed by saturated  $\text{NaHCO}_3$  aqueous solution and brine, dried over  $\text{Na}_2\text{SO}_4$ , filtered, and concentrated under reduced pressure. The crude material was purified by a  $\text{SiO}_2$  flash column chromatography ( $\text{EtOAc}/n\text{-hexane}$  = 1/3, v/v) to afford **2ah** (157 mg, 0.98 mmol) in 45% yield as colorless oil.

#### 4-oxobutyl 2-(4-((2-oxocyclopentyl)methyl)phenyl)propanoate (**2ah**)

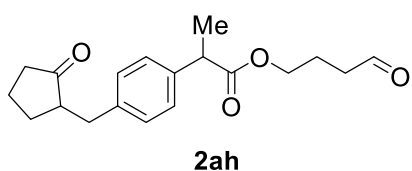

**2ah**

$^1\text{H NMR}$  ( $\text{CDCl}_3$ ):  $\delta$  = 9.67-9.60 (1H, m), 7.17 (2H, d,  $J$  = 8.0 Hz), 7.09 (2H, d,  $J$  = 8.0 Hz), 4.13-3.88 (2H, m), 3.71-3.56 (1H, m), 3.09 (1H, dd,  $J$  = 14.0, 4.3 Hz), 2.54-2.39 (1H, m), 2.38-2.20 (4H, m), 2.16-1.96 (2H, m), 1.96-1.78 (3H, m), 1.77-1.57 (1H, m), 1.56-1.35 (4H, m);  $^{13}\text{C NMR}$

( $\text{CDCl}_3$ ):  $\delta$  = 220.15, 201.12, 174.41, 138.86, 138.18, 129.04, 127.40, 77.32, 77.68, 63.49, 50.88, 44.98, 40.19, 38.09, 35.08, 29.13, 21.16, 20.44, 18.23.; HRMS (ESI):  $m/z$  calcd for  $\text{C}_{19}\text{H}_{24}\text{O}_4\text{Na}$   $[\text{M}+\text{Na}]^+$  339.1567. Found 339.1563; IR (Neat): 2964, 2726, 1733, 1512, 1162, 860  $\text{cm}^{-1}$

#### (7-E) Synthesis of **2ai**

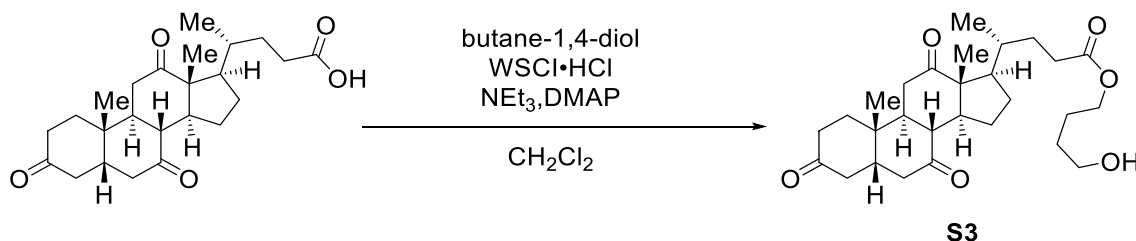

**S3**

To a solution of butane-1,4-diol (2.39 mL, 27 mmol),  $\text{WSCI}\cdot\text{HCl}$  (3.45 g, 18 mmol), dehydrocholic acid (3.63 g,

9.0 mmol), and DMAP (222 mg, 1.8 mmol) in CH<sub>2</sub>Cl<sub>2</sub> (30 mL), NEt<sub>3</sub> (3.78 mL, 27 mmol) was added. After 16 hours of stirring at room temperature, 1 M HCl aqueous solution was added and the water phase was extracted with CH<sub>2</sub>Cl<sub>2</sub> three times. The combined organic layer was washed by saturated NaHCO<sub>3</sub> aqueous solution, dried over Na<sub>2</sub>SO<sub>4</sub>, filtered, and concentrated under reduced pressure. The crude material was purified by a SiO<sub>2</sub> flash column chromatography with EtOAc/*n*-hexane (1/9 to 1/0, v/v) as an eluent twice to afford **S3** (984 mg, 2.07 mmol) in 23% yield as white solid.

#### 4-hydroxybutyl

#### (*R*)-4-((5*S*,8*R*,9*S*,10*S*,13*R*,14*S*,17*R*)-10,13-dimethyl-3,7,12-trioxohexadecahydro-1*H*-cyclopenta[*a*]phenanthren-17-yl)pentanoate (**S3**)

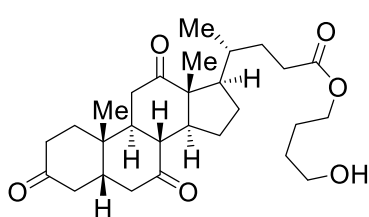

**S3**

<sup>1</sup>H NMR (CDCl<sub>3</sub>): δ = 4.06 (2H, t, *J* = 6.6 Hz), 3.63 (2H, t, *J* = 6.3 Hz), 2.94-2.72 (3H, m), 2.42-1.49 (22H, m), 1.42-1.14 (7H, m), 1.03 (3H, s), 0.80 (3H, d, *J* = 6.9 Hz); <sup>13</sup>C NMR (CDCl<sub>3</sub>): δ = 212.00, 209.10, 208.71, 174.12, 64.04, 62.25, 56.82, 51.68, 48.91, 46.76, 45.54, 45.46, 44.90, 42.71, 38.56, 36.40, 35.94, 35.40, 35.18, 31.41, 30.35, 29.08, 29.08, 27.52, 25.05, 21.83, 18.57, 11.78.; HRMS (ESI): *m/z* calcd for C<sub>28</sub>H<sub>42</sub>O<sub>6</sub>Na [M+Na]<sup>+</sup> 497.2874.

Found 497.2866; IR (Neat): 3398, 2958, 1720, 1706, 1173, 734 cm<sup>-1</sup>

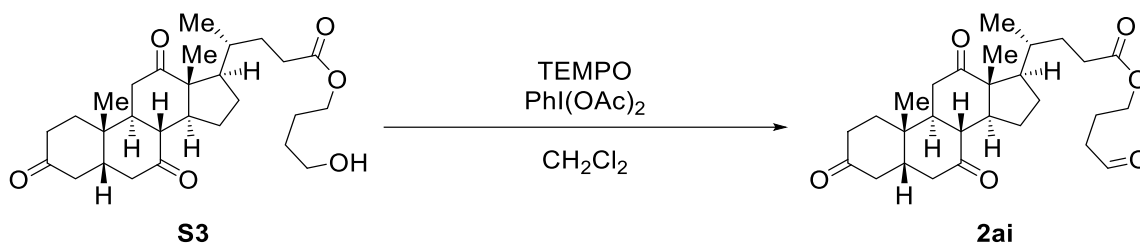

**S3**

**2ai**

To a solution of **S3** (474 mg, 1.0 mmol) and TEMPO (32 mg, 0.10 mmol) in CH<sub>2</sub>Cl<sub>2</sub> (1.0 mL), PhI(OAc)<sub>2</sub> (354 mg, 1.1 mmol) was added. After 14 hours of stirring, the reaction was quenched with saturated Na<sub>2</sub>S<sub>2</sub>O<sub>3</sub> aqueous solution. The water phase was extracted with CH<sub>2</sub>Cl<sub>2</sub> three times. The combined organic layer was washed by saturated NaHCO<sub>3</sub> aqueous solution and brine, dried over Na<sub>2</sub>SO<sub>4</sub>, filtered, and concentrated under reduced pressure. The crude material was purified by a SiO<sub>2</sub> flash column chromatography with EtOAc/*n*-hexane (1/10 to 2/1, v/v) to afford **2ai** (254 mg, 0.54 mmol) in 54% yield as white solid.

#### 4-oxobutyl

#### (*R*)-4-((5*S*,8*R*,9*S*,10*S*,13*R*,14*S*,17*R*)-10,13-dimethyl-3,7,12-trioxohexadecahydro-1*H*-cyclopenta[*a*]phenanthren-17-yl)pentanoate (**2ai**)

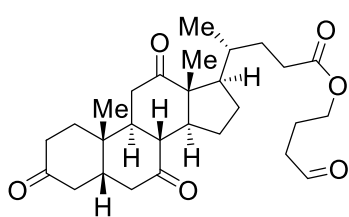

**2ai**

<sup>1</sup>H NMR (CDCl<sub>3</sub>): δ = 9.76 (1H, s), 4.07 (2H, t, *J* = 6.3 Hz), 2.96-2.72 (3H, m), 2.56-2.46 (2H, m), 2.41-1.70 (18H, m), 1.64-1.52 (1H, m), 1.42-1.15 (7H, m), 1.04 (3H, s), 0.82 (3H, d, *J* = 6.3 Hz); <sup>13</sup>C NMR (CDCl<sub>3</sub>): δ = 211.92, 209.04, 208.69, 201.18, 173.94, 63.19, 56.85, 51.70, 48.95, 46.80, 45.56, 45.49, 44.94, 42.75, 40.46, 38.60, 36.45, 35.98, 35.44, 35.23, 31.33, 30.34, 27.58, 25.09, 21.87, 21.32, 18.59, 11.81.; HRMS (ESI): *m/z* calcd for C<sub>28</sub>H<sub>40</sub>O<sub>6</sub>Na [M+Na]<sup>+</sup>



495.2717. Found 495.2713; IR (Neat): 2961, 1708, 1387, 1172, 913, 744  $\text{cm}^{-1}$

#### (7-F) Synthesis of 2aj

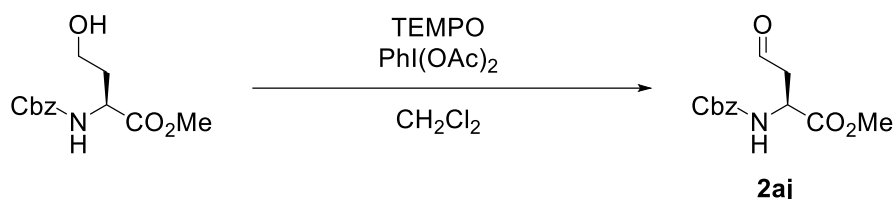

To a solution of *N*-(Benzyloxycarbonyl)-homoserine methyl ester<sup>3</sup> (401 mg, 1.5 mmol) and TEMPO (23 mg, 0.15 mmol) in  $\text{CH}_2\text{Cl}_2$  (1.5 mL),  $\text{PhI}(\text{OAc})_2$  (531 mg, 1.65 mmol) was added. After 1.5 hours of stirring, the reaction was quenched with saturated  $\text{Na}_2\text{S}_2\text{O}_3$  aqueous solution. The water phase was extracted with  $\text{CH}_2\text{Cl}_2$  three times. The combined organic layer was washed by saturated  $\text{NaHCO}_3$  aqueous solution and brine, dried over  $\text{Na}_2\text{SO}_4$ , filtered, and concentrated under reduced pressure. The crude material was purified by a  $\text{SiO}_2$  flash column chromatography with  $\text{EtOAc}/n$ -hexane (1/19 to 1/1, v/v) twice to afford **2aj** (150 mg, 0.57 mmol) in 38% yield as colorless oil.

#### methyl (*S*)-2-(((benzyloxy)carbonyl)amino)-4-oxobutanoate (**2aj**)

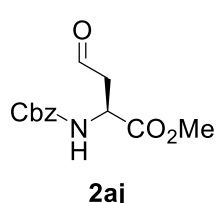

NMR spectra of the obtained product were consistent with the reported one.<sup>4</sup>

$^1\text{H}$  NMR ( $\text{CDCl}_3$ ):  $\delta$  = 9.76 (1H, s), 7.39-7.26 (5H, m), 5.64 (1H, t,  $J$  = 7.4 Hz), 5.10 (2H, s), 4.68-4.54 (1H, m), 3.73 (3H, s), 3.22-2.93 (2H, m);  $^{13}\text{C}$  NMR ( $\text{CDCl}_3$ ):  $\delta$  = 199.17, 171.08, 155.88, 136.00, 128.55, 128.27, 128.11, 67.19, 52.89, 49.00, 45.83.

#### (7-G) Synthesis of 2ak

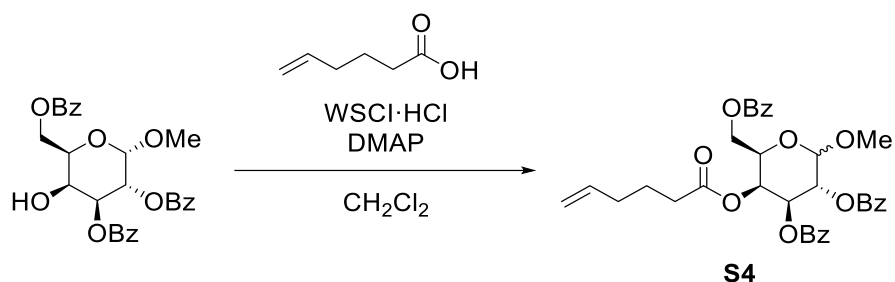

To a solution of hex-5-enoic acid (153  $\mu\text{L}$ , 1.29 mmol),  $\text{WSCI}\cdot\text{HCl}$  (248 mg, 1.29 mmol), and DMAP (22.4 mg, 0.18 mmol) in  $\text{CH}_2\text{Cl}_2$  (6 mL), protected sugar (500 mg 1.08 mmol) was added. After overnight of stirring at room temperature, 1 M HCl aqueous solution was added and the water phase was extracted with  $\text{CH}_2\text{Cl}_2$  three times. The combined organic layers were washed with saturated  $\text{NaHCO}_3$  aqueous solution, dried over  $\text{Na}_2\text{SO}_4$ , filtered, and concentrated under reduced pressure. The crude material was purified by a  $\text{SiO}_2$  flash column chromatography ( $\text{EtOAc}/n$ -hexane = 1/3, v/v) to afford **S4** (599 mg, 1.07 mmol) in 99% yield as colorless oil.

**(3R,4S,5S,6R)-6-((benzyloxy)methyl)-5-(hex-5-enoyloxy)-2-methoxytetrahydro-2H-pyran-3,4-diyl dibenzoate (S4)**

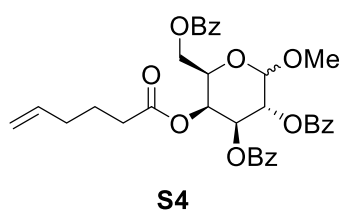

$^1\text{H NMR}$  ( $\text{CDCl}_3$ ):  $\delta$  = 8.08-7.95 (4H, m), 7.92-7.83 (2H, m), 7.60-7.26 (9H, m), 5.84-5.79 (2H, m), 5.76-5.64 (1H, m), 5.62-5.46 (1H, m), 5.24-5.15 (1H, m), 5.03-4.83 (2H, m), 4.57-4.45 (2H, m), 4.37-4.23 (1H, m), 3.44 (3H, m), 2.51-2.36 (2H, m), 2.08-1.87 (2H, m), 1.73-1.61 (2H, m);  $^{13}\text{C NMR}$  ( $\text{CDCl}_3$ ):  $\delta$  = 172.52, 166.02, 166.00, 165.47, 137.34, 133.35, 133.24, 133.21, 129.83, 129.67, 129.58,

129.46, 129.22, 129.18, 128.46, 128.40, 128.34, 115.53, 97.55, 77.26, 76.74, 68.99, 68.30, 66.55, 66.23, 55.63, 33.23, 32.88, 23.97.; HRMS (ESI):  $m/z$  calcd for  $\text{C}_{34}\text{H}_{34}\text{O}_{10}\text{Na}$   $[\text{M}+\text{Na}]^+$  625.2044. Found 625.2017; IR (Neat): 3069, 2937, 1734, 1601, 1278, 1110, 1070, 1050, 1028, 711  $\text{cm}^{-1}$

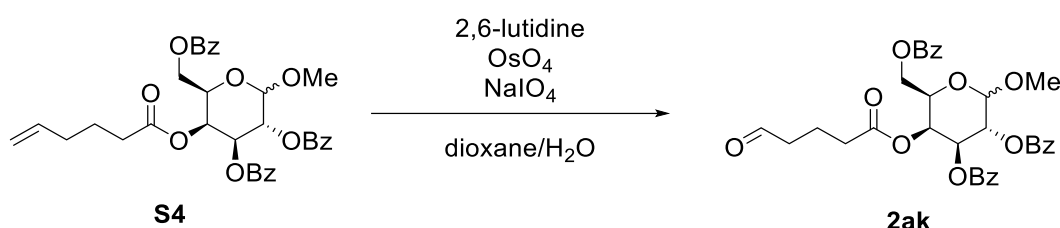

To a solution of **S4** (143 mg, 0.25 mmol) in 3:1 dioxane/ $\text{H}_2\text{O}$  (1.2 mL), 2,6-lutidine (58.9  $\mu\text{L}$ , 0.51 mmol),  $\text{OsO}_4$  (2.5 % wt. % in tert-butanol, 59.0  $\mu\text{L}$ , 0.02 mmol) and  $\text{NaIO}_4$  (217 mg, 1.02 mmol) were added. After overnight of stirring at room temperature, the reaction mixture was extracted with  $\text{CH}_2\text{Cl}_2$  three times. The combined organic layer was washed with brine and dried over  $\text{Na}_2\text{SO}_4$ , filtered, and concentrated under reduced pressure. The crude material was purified by a  $\text{SiO}_2$  flash column chromatography (EtOAc/*n*-hexane = 1/3, v/v) to afford **2ak** (103 mg, 0.18 mmol) in 72% yield as a colorless oil.

**(3R,4S,5S,6R)-6-((benzyloxy)methyl)-2-methoxy-5-((5-oxopentanoil)oxy)tetrahydro-2H-pyran-3,4-diyl dibenzoate (2ak)**

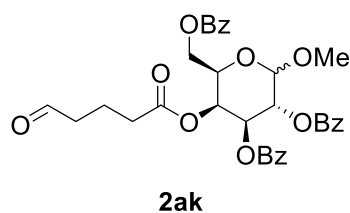

$^1\text{H NMR}$  ( $\text{CDCl}_3$ ):  $\delta$  = 9.61 (1H, s), 8.12-7.93 (4H, m), 7.86 (2H, d,  $J$  = 8.2 Hz), 7.62-7.29 (9H, m), 5.86-5.75 (2H, m), 5.66-5.51 (1H, m), 5.19 (1H, d,  $J$  = 3.7 Hz), 4.57-4.41 (2H, m), 4.39-4.27 (1H, m), 3.45 (3H, s), 2.48 (2H, t,  $J$  = 8.0 Hz), 2.37 (2H, t,  $J$  = 7.6 Hz), 1.95-1.79 (2H, m);  $^{13}\text{C NMR}$  ( $\text{CDCl}_3$ ):  $\delta$  = 201.12, 171.96, 166.00, 165.44, 133.39, 133.31, 133.29, 129.83, 129.66, 129.53, 129.40,

129.19, 128.48, 128.41, 97.57, 77.26, 76.74, 68.80, 68.46, 68.40, 66.21, 55.68, 42.59, 32.75, 17.12.; HRMS (ESI):  $m/z$  calcd for  $\text{C}_{33}\text{H}_{32}\text{O}_{11}\text{Na}$   $[\text{M}+\text{Na}]^+$  627.1837. Found 627.1819; IR (Neat): 3504, 2938, 2724, 1724, 1451, 1271, 1110, 1070, 1049, 1029, 711  $\text{cm}^{-1}$

## 8. Characterization of Target Compounds

### isoquinolin-1-yl(phenyl)methanol (3a)

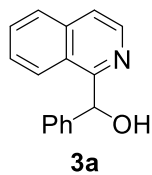

NMR spectra of the obtained product were consistent with the reported one.<sup>5</sup>

20.0 mg, 85% yield; white solid; <sup>1</sup>H NMR (CDCl<sub>3</sub>): δ = 8.50 (1H, d, *J* = 6.0 Hz), 7.91 (1H, d, *J* = 8.2 Hz), 7.80 (1H, d, *J* = 8.2 Hz), 7.65-7.55 (2H, m), 7.50-7.39 (1H, m), 7.34-7.11 (5H, m), 6.33 (1H, s); <sup>13</sup>C NMR (CDCl<sub>3</sub>): δ = 159.12, 143.21, 139.82, 136.57, 130.33, 128.71, 127.86, 127.63, 127.50, 127.38, 125.15, 124.80, 121.13, 72.52.

### (4-fluorophenyl)(isoquinolin-1-yl)methanol (3b)

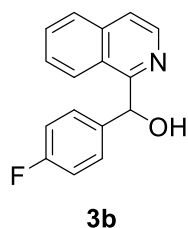

19.7 mg, 78% yield; white solid; <sup>1</sup>H NMR (CDCl<sub>3</sub>): 8.52 (1H, d, *J* = 5.5 Hz), 7.95-7.78 (2H, m), 7.69-7.60 (2H, m), 7.52-7.43 (1H, m), 7.34-7.21 (2H, m), 7.03-6.98 (2H, m), 6.46-6.05 (2H, m); <sup>13</sup>C NMR (CDCl<sub>3</sub>): δ = 162.28 (d, *J* = 250.8 Hz), 158.82, 139.97, 139.24 (d, *J* = 2.9 Hz), 136.58, 130.34, 129.36 (d, *J* = 8.6 Hz), 127.53, 127.46, 125.03, 124.59, 121.22, 115.58 (d, *J* = 21.9 Hz), 71.75.; <sup>19</sup>F NMR (CDCl<sub>3</sub>): δ = -113.87.; HRMS (ESI): *m/z* calcd for C<sub>16</sub>H<sub>12</sub>FNONa [M+Na]<sup>+</sup> 276.0795. Found 276.0807; IR (Neat): 3378, 2925, 1506, 1071, 747 cm<sup>-1</sup>.

### (4-chlorophenyl)(isoquinolin-1-yl)methanol (3c)

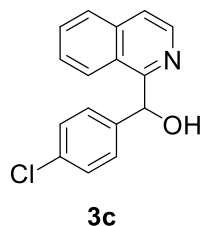

18.9 mg, 70% yield; white solid; <sup>1</sup>H NMR (CDCl<sub>3</sub>): δ = 8.52 (1H, d, *J* = 4.8 Hz), 7.93-7.75 (2H, m), 7.69-7.58 (2H, m), 7.54-7.43 (1H, m), 7.29-7.17 (4H, m), 6.47-5.93 (2H, m); <sup>13</sup>C NMR (CDCl<sub>3</sub>): δ = 158.62, 141.80, 139.98, 136.61, 133.69, 130.41, 129.02, 128.89, 127.61, 127.50, 125.04, 124.53, 121.30, 71.77.; HRMS (ESI): *m/z* calcd for C<sub>16</sub>H<sub>12</sub>ClNONa [M+Na]<sup>+</sup> 292.0500. Found 292.0510; IR (Neat): 3357, 2925, 1490, 1090, 747 cm<sup>-1</sup>.

### (4-bromophenyl)(isoquinolin-1-yl)methanol (3d)

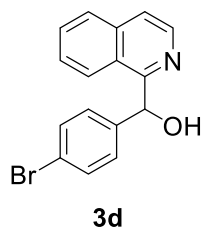

21.7 mg, 69% yield; white solid; <sup>1</sup>H NMR (CDCl<sub>3</sub>): δ = 8.52 (1H, d, *J* = 5.2 Hz), 7.91-7.80 (2H, m), 7.69-7.61 (2H, m), 7.52-7.45 (1H, m), 7.42-7.36 (2H, m), 7.21-7.17 (2H, m), 6.31 (1H, s); <sup>13</sup>C NMR (CDCl<sub>3</sub>): δ = 158.56, 142.26, 139.90, 136.63, 131.84, 130.47, 129.35, 127.66, 127.51, 125.03, 124.55, 121.89, 121.33, 71.83.; HRMS (ESI): *m/z* calcd for C<sub>16</sub>H<sub>12</sub>BrNONa [M+Na]<sup>+</sup> 335.9994. Found 336.0010; IR (Neat): 3357, 2921, 1486, 1071, 746 cm<sup>-1</sup>.

### isoquinolin-1-yl(4-methoxyphenyl)methanol (3e)

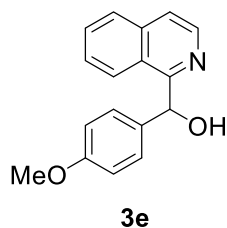

22.0 mg, 83% yield; white solid; <sup>1</sup>H NMR (CDCl<sub>3</sub>): δ = 8.51 (1H, d, *J* = 6.0 Hz), 7.92 (1H, d, *J* = 8.2 Hz), 7.82 (1H, d, *J* = 8.7 Hz), 7.66-7.57 (2H, m), 7.51-7.42 (1H, m), 7.29-7.16 (2H, m), 6.86-6.74 (2H, m), 6.31 (1H, s), 3.72 (3H, s); <sup>13</sup>C NMR (CDCl<sub>3</sub>): δ = 159.33, 159.14, 139.89, 136.53, 135.70, 130.22, 128.86, 127.40, 127.35, 125.12, 124.85, 121.00, 114.06, 71.99, 55.19.; HRMS (ESI): *m/z* calcd for C<sub>17</sub>H<sub>15</sub>NO<sub>2</sub>Na [M+Na]<sup>+</sup> 288.0995. Found 288.1002; IR (Neat): 3344, 3003, 1509, 1024, 1000, 742 cm<sup>-1</sup>.

### isoquinolin-1-yl(3-(trifluoromethyl)phenyl)methanol (**3f**)

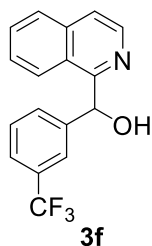

18.6 mg, 61% yield; white solid;  $^1\text{H NMR}$  ( $\text{CDCl}_3$ ):  $\delta$  = 8.54 (1H, d,  $J$  = 6.0 Hz), 7.95-7.81 (2H, m), 7.71-7.60 (3H, m), 7.55-7.44 (3H, m), 7.42-7.31 (1H, m), 6.65-5.92 (2H, m);  $^{13}\text{C NMR}$  ( $\text{CDCl}_3$ ):  $\delta$  = 158.22, 141.18, 140.06, 136.66, 131.00 (q,  $J$  = 31.6 Hz), 130.87, 130.49, 129.16, 127.74, 127.57, 125.01, 124.75 (q,  $J$  = 4.0 Hz), 124.45 (q,  $J$  = 4.0 Hz), 124.31, 123.93 (q,  $J$  = 270.6 Hz), 121.46, 71.90.;  $^{19}\text{F NMR}$  ( $\text{CDCl}_3$ ):  $\delta$  = -62.13.; HRMS (ESI):  $m/z$  calcd for  $\text{C}_{17}\text{H}_{12}\text{F}_3\text{NONa}$   $[\text{M}+\text{Na}]^+$  326.0763. Found 326.0759; IR (Neat): 3371, 2927, 1329, 1123, 704  $\text{cm}^{-1}$ .

### isoquinolin-1-yl(*o*-tolyl)methanol (**3g**)

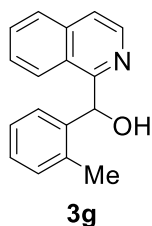

NMR spectra of the obtained product were consistent with the reported one.<sup>6</sup>

20.8 mg, 83% yield; white solid;  $^1\text{H NMR}$  ( $\text{CDCl}_3$ ):  $\delta$  = 8.55 (1H, d,  $J$  = 5.7 Hz), 7.84 (1H, d,  $J$  = 8.0 Hz), 7.67 (1H, d,  $J$  = 5.7 Hz), 7.64-7.58 (2H, m), 7.44-7.37 (1H, m), 7.22 (1H, d,  $J$  = 7.4 Hz), 7.15-7.09 (1H, m), 6.97-6.91 (1H, m), 6.62 (1H, d,  $J$  = 7.4 Hz), 6.53 (1H, s), 6.19 (1H, brs), 2.63 (3H, s);  $^{13}\text{C NMR}$  ( $\text{CDCl}_3$ ):  $\delta$  = 159.42, 141.31, 139.78, 136.60, 136.44, 130.99, 130.26, 127.94, 127.84, 127.47, 127.36, 126.29, 125.32, 124.77, 121.02, 69.88, 19.46.

### 1-(isoquinolin-1-yl)propan-1-ol (**3h**)

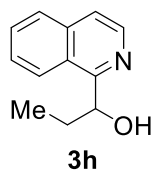

NMR spectra of the obtained product were consistent with the reported one.<sup>7</sup>

13.6 mg, 73% yield; pale yellow oil;  $^1\text{H NMR}$  ( $\text{CDCl}_3$ ):  $\delta$  = 8.43 (1H, d,  $J$  = 5.7 Hz), 8.03 (1H, d,  $J$  = 8.6 Hz), 7.85 (1H, d,  $J$  = 8.6 Hz), 7.72-7.66 (1H, m), 7.63-7.54 (2H, m), 5.41 (1H, dd,  $J$  = 7.4, 3.4 Hz), 5.12 (1H, brs), 2.12-1.98 (1H, m), 1.76-1.62 (1H, m), 0.99 (3H, t,  $J$  = 7.4 Hz);  $^{13}\text{C NMR}$  ( $\text{CDCl}_3$ ):  $\delta$  = 161.24, 140.21, 136.42, 130.25, 127.52, 127.28, 124.84, 124.18, 120.42, 70.61, 31.98, 9.70.

### 5-hydroxy-5-(isoquinolin-1-yl)pentyl benzoate (**3i**)

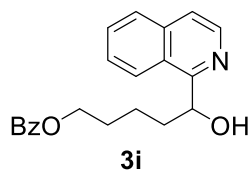

28.7 mg, 86% yield; pale yellow oil;  $^1\text{H NMR}$  ( $\text{CDCl}_3$ ):  $\delta$  = 8.38 (1H, d,  $J$  = 5.5 Hz), 8.04-7.89 (3H, m), 7.80 (1H, d,  $J$  = 8.7 Hz), 7.69-7.60 (1H, m), 7.59-7.40 (3H, m), 7.40-7.29 (2H, m), 5.56-5.35 (1H, m), 5.14 (1H, brs), 4.40-4.13 (2H, m), 2.14-1.91 (1H, m), 1.90-1.43 (5H, m);  $^{13}\text{C NMR}$  ( $\text{CDCl}_3$ ):  $\delta$  = 166.60, 161.18, 139.79, 136.50, 132.78,

130.57, 130.36, 129.51, 128.27, 127.59, 127.57, 124.67, 124.12, 120.67, 69.42, 64.82, 38.65, 28.60, 22.12.; HRMS (ESI):  $m/z$  calcd for  $\text{C}_{21}\text{H}_{21}\text{NO}_3\text{Na}$   $[\text{M}+\text{Na}]^+$  358.1414. Found 358.1398; IR (Neat): 3403, 2950, 1715, 1118, 713  $\text{cm}^{-1}$ .

### 2-(6-hydroxy-6-(isoquinolin-1-yl)hexyl)isoindoline-1,3-dione (**3j**)

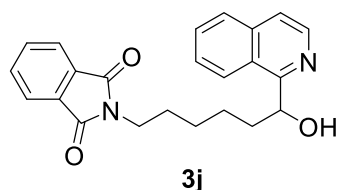

31.7 mg, 85% yield; white solid;  $^1\text{H NMR}$  ( $\text{CDCl}_3$ ):  $\delta$  = 8.40 (1H, d,  $J$  = 6.0 Hz), 8.00 (1H, d,  $J$  = 8.2 Hz), 7.86-7.74 (3H, m), 7.74-7.52 (5H, m), 5.54-5.34 (1H, m), 5.12 (1H, brs), 3.63 (2H, t,  $J$  = 7.3 Hz), 2.05-1.82 (1H, m), 1.74-1.16 (7H, m);  $^{13}\text{C NMR}$  ( $\text{CDCl}_3$ ):  $\delta$  = 168.39, 161.30, 140.03, 136.42, 133.80, 132.11, 130.36, 127.52, 127.42, 124.68, 124.12, 123.10, 120.49, 69.47, 39.00, 37.96, 28.55, 26.83,

25.18.; HRMS (ESI):  $m/z$  calcd for  $C_{23}H_{22}N_2O_3Na$   $[M+Na]^+$  397.1523. Found 397.1524; IR (Neat): 3462, 2939, 1770, 1710, 1056, 751  $cm^{-1}$ .

### 11-hydroxy-11-(isoquinolin-1-yl)undecan-2-one (3k)

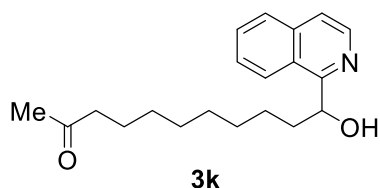

25.7 mg, 82% yield; white solid;  $^1H$  NMR ( $CDCl_3$ ):  $\delta$  = 8.42 (1H, d,  $J$  = 5.7 Hz), 8.00 (1H, d,  $J$  = 8.0 Hz), 7.84 (1H, d,  $J$  = 8.0 Hz), 7.71-7.65 (1H, m), 7.64-7.53 (2H, m), 5.43 (1H, d,  $J$  = 7.7, 2.6 Hz), 5.10 (1H, brs), 2.37 (2H, t,  $J$  = 7.4 Hz), 2.10 (3H, s), 1.99-1.88 (1H, m), 1.69-1.37 (5H, m), 1.38-1.14 (8H, m);  $^{13}C$  NMR ( $CDCl_3$ ):  $\delta$  = 209.38, 161.49, 140.26, 136.39, 130.22, 127.51,

127.28, 124.73, 124.09, 120.37, 69.60, 43.75, 39.27, 29.82, 29.47, 29.35, 29.26, 29.09, 25.55, 23.78.; HRMS (ESI):  $m/z$  calcd for  $C_{20}H_{27}NO_2Na$   $[M+Na]^+$  336.1934. Found 336.1931; IR (Neat): 3402, 2928, 2853, 1714, 1075, 749  $cm^{-1}$

### 8-chloro-1-(isoquinolin-1-yl)octan-1-ol (3l)

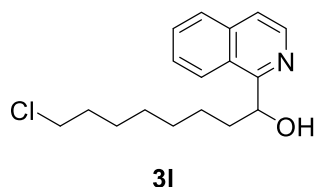

15.9 mg, 54% yield; colorless oil;  $^1H$  NMR ( $CDCl_3$ ):  $\delta$  = 8.43 (1H, d,  $J$  = 6.0 Hz), 8.06-7.97 (1H, m), 7.86 (1H, d,  $J$  = 8.2 Hz), 7.74-7.66 (1H, m), 7.66-7.54 (2H, m), 5.52-5.39 (1H, m), 5.13 (1H, brs), 3.49 (2H, t,  $J$  = 6.9 Hz), 2.02-1.86 (1H, m), 1.82-1.16 (11H, m);  $^{13}C$  NMR ( $CDCl_3$ ):  $\delta$  = 161.46, 140.10, 136.45, 130.36, 127.56, 127.38, 124.73, 124.12, 120.48, 69.58, 45.14, 39.19, 32.56, 29.36, 28.79, 26.77,

25.48.; HRMS (ESI):  $m/z$  calcd for  $C_{17}H_{22}ClNO$   $[M+Na]^+$  314.1282. Found 314.1269; IR (Neat): 3393, 2932, 1506, 1068, 747  $cm^{-1}$

### (5-bromoisoquinolin-1-yl)(phenyl)methanol (3m)

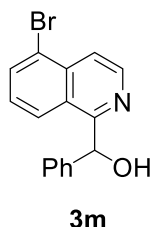

27.4 mg, 87% yield; white solid;  $^1H$  NMR ( $CDCl_3$ ):  $\delta$  = 8.60 (1H, d,  $J$  = 6.4 Hz), 8.00 (1H, d,  $J$  = 6.0 Hz), 7.94-7.81 (2H, m), 7.36-7.11 (6H, m), 6.32 (1H, s);  $^{13}C$  NMR ( $CDCl_3$ ):  $\delta$  = 159.67, 142.85, 141.01, 135.81, 134.23, 128.82, 128.05, 127.92, 127.58, 126.29, 124.57, 122.46, 120.20, 72.59.; HRMS (ESI):  $m/z$  calcd for  $C_{16}H_{12}BrNONa$   $[M+Na]^+$  335.9994. Found 335.9992; IR (Neat): 3364, 2927, 1489, 1067, 750  $cm^{-1}$

### (6-bromoisoquinolin-1-yl)(phenyl)methanol (3n)

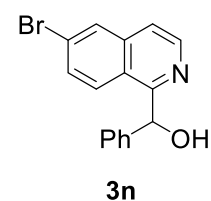

29.9 mg, 95% yield; white solid;  $^1H$  NMR ( $CDCl_3$ ):  $\delta$  = 8.52 (1H, d,  $J$  = 5.7 Hz), 7.97 (1H, d,  $J$  = 1.7 Hz), 7.77 (1H, d,  $J$  = 9.2 Hz), 7.55-7.45 (2H, m), 7.29-7.15 (5H, m), 6.28 (1H, s);  $^{13}C$  NMR ( $CDCl_3$ ):  $\delta$  = 159.51, 142.84, 140.79, 137.76, 131.12, 129.54, 128.81, 128.06, 127.56, 126.57, 125.37, 123.58, 120.11, 72.59.; HRMS (ESI):  $m/z$  calcd for  $C_{16}H_{12}BrNONa$   $[M+Na]^+$  335.9994. Found 335.9983; IR (Neat): 3363, 2925, 1490, 1063, 758  $cm^{-1}$

### (7-bromoisoquinolin-1-yl)(phenyl)methanol (3o)

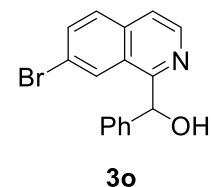

23.1 mg, 74% yield; white solid;  $^1H$  NMR ( $CDCl_3$ ):  $\delta$  = 8.55 (1H, d,  $J$  = 6.0 Hz), 8.10 (1H, s), 7.70 (1H, s), 7.61 (1H, d,  $J$  = 5.5 Hz), 7.40-7.15 (5H, m), 6.27 (1H, s), 6.09 (1H, brs);  $^{13}C$  NMR ( $CDCl_3$ ):  $\delta$  = 158.42, 142.73, 140.41, 135.02, 133.90, 129.05, 128.86, 128.10, 127.52,

127.23, 126.15, 121.36, 120.82, 72.52.; HRMS (ESI):  $m/z$  calcd for  $C_{16}H_{12}BrNONa$   $[M+Na]^+$  335.9994. Found 335.9988; IR (Neat): 3365, 2924, 1492, 1066, 757  $cm^{-1}$

#### (4-bromoisoquinolin-1-yl)(phenyl)methanol (3p)

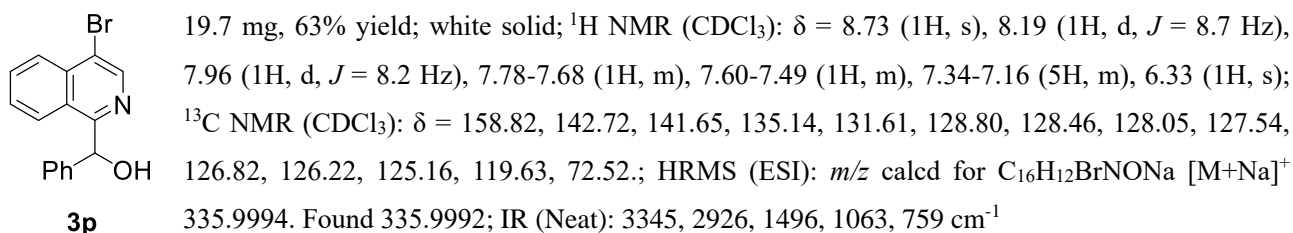

#### *N*-(1-(hydroxy(phenyl)methyl)isoquinolin-5-yl)acetamide (3q)

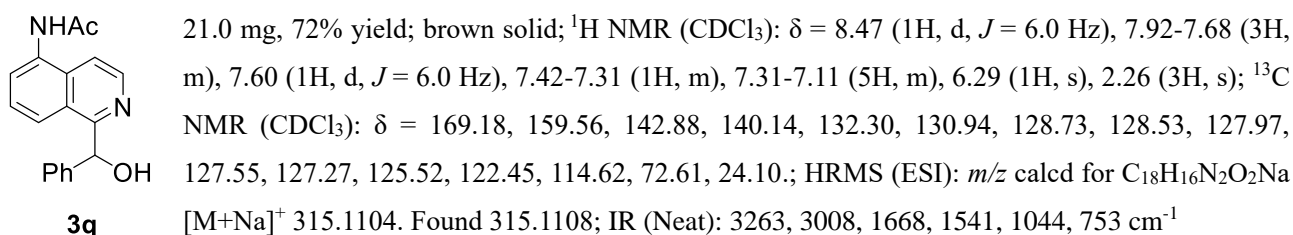

#### 1-(hydroxy(phenyl)methyl)isoquinolin-6-yl acetate (3r)

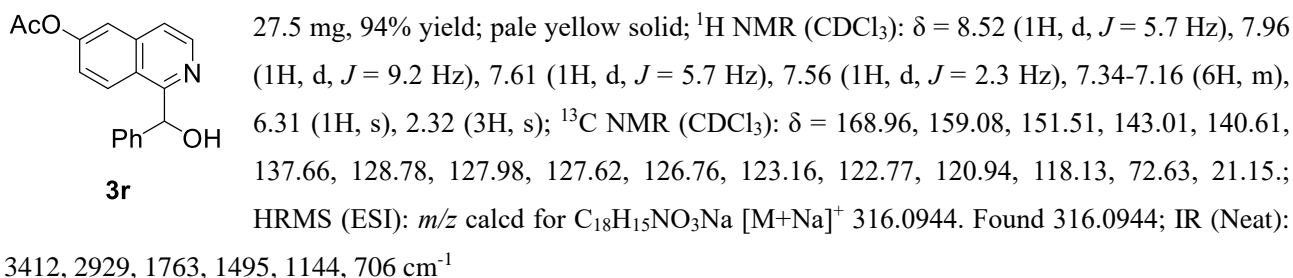

#### 1-(4-methylquinolin-2-yl)propan-1-ol (3s)

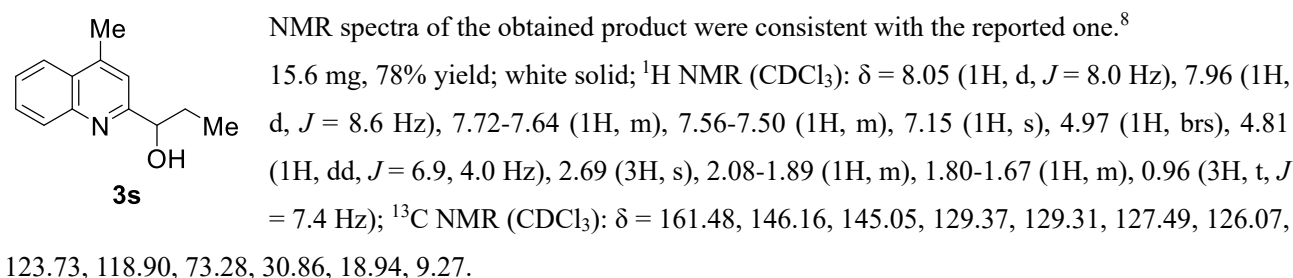

#### 1-(2-methylquinolin-4-yl)propan-1-ol (3t)

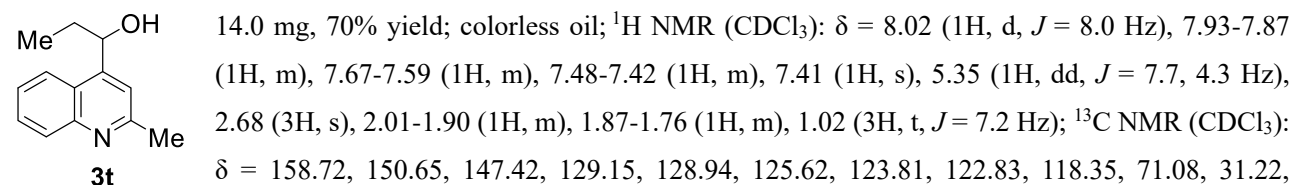

25.10, 10.27; HRMS (ESI):  $m/z$  calcd for  $C_{13}H_{15}NONa$   $[M+Na]^+$  224.1046. Found 224.1056; IR (Neat): 3363, 2965, 1602, 1508, 1093, 759  $cm^{-1}$

### methyl 4-(1-hydroxypropyl)-2-methylquinoline-6-carboxylate (**3u**)

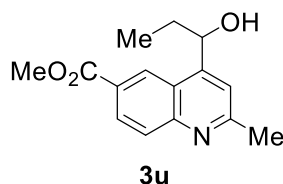

16.5 mg, 64% yield; pale brown solid;  $^1H$  NMR ( $CDCl_3$ ):  $\delta$  = 8.62 (1H, d,  $J$  = 1.9 Hz), 8.19 (1H, dd,  $J$  = 9.1, 1.9 Hz), 8.03 (1H, d,  $J$  = 9.1 Hz), 7.49 (1H, s), 5.41 (1H, dd,  $J$  = 7.7, 4.3 Hz), 3.96 (3H, s), 2.71 (3H, s), 2.02-1.88 (1H, m), 1.88-1.74 (1H, m), 1.02 (3H, t,  $J$  = 7.4 Hz);  $^{13}C$  NMR ( $CD_3OD$ ):  $\delta$  = 167.93, 162.93, 155.11, 150.25, 129.91, 129.33, 128.47, 127.59, 124.72, 120.93, 71.82, 53.01, 32.55, 24.95, 10.57.; HRMS

(ESI):  $m/z$  calcd for  $C_{15}H_{17}NO_3Na$   $[M+Na]^+$  282.1101. Found 282.1114; IR (Neat): 3214, 2963, 1718, 1458, 1276, 1103, 761  $cm^{-1}$

### 1-(6-fluoro-2-methylquinolin-4-yl)propan-1-ol (**3v**)

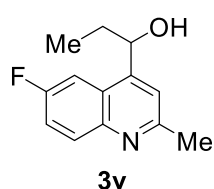

NMR spectra of the obtained product were consistent with the reported one.<sup>9</sup>

15.7 mg, 72% yield; yellow oil;  $^1H$  NMR ( $CDCl_3$ ):  $\delta$  = 8.00 (1H, dd,  $J$  = 9.5, 4.0 Hz), 7.55 (1H, dd,  $J$  = 9.5, 4.0 Hz), 7.43-7.39 (2H, m), 5.23-5.21 (1H, m), 2.70 (3H, s), 2.18 (1H, brs) 1.98-1.91 (1H, m), 1.84-1.78 (1H, m), 1.03 (3H, t,  $J$  = 7.4 Hz).;  $^{13}C$  NMR ( $CDCl_3$ ):  $\delta$  = 158.80 (d,  $J$  = 244.4 Hz), 158.13 (d,  $J$  = 2.4 Hz), 149.52, 149.48, 144.98, 131.57 (d,  $J$  = 9.1 Hz), 124.45 (d,  $J$  = 9.1 Hz), 119.54 (d,  $J$  = 23.3 Hz), 106.86 (d,  $J$  = 23.3 Hz), 71.53, 30.98, 25.17, 10.21.;  $^{19}F$

NMR ( $CDCl_3$ ):  $\delta$  = -113.64.

### 1-(6-bromo-2-methylquinolin-4-yl)propan-1-ol (**3w**)

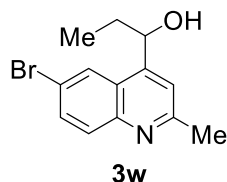

NMR spectra of the obtained product were consistent with the reported one.<sup>9</sup>

13.8 mg, 49% yield; colorless oil;  $^1H$  NMR ( $CDCl_3$ ):  $\delta$  = 8.09 (1H, s), 7.88 (1H, d,  $J$  = 9.0 Hz), 7.71 (1H, dd,  $J$  = 9.0, 1.3 Hz), 7.43 (1H, s), 5.26 (1H, br), 2.70 (3H, s) 2.12 (1H, brs), 1.96-1.92 (1H, m), 1.87-1.79 (1H, m), 1.03 (3H, t,  $J$  = 7.4 Hz).;  $^{13}C$  NMR ( $CDCl_3$ ):  $\delta$  = 159.34, 149.19, 146.47, 132.40, 130.94, 125.40, 125.08, 119.56, 119.25, 71.28, 31.10,

25.32, 10.17.

### 1-(7-bromo-4-chloroquinolin-2-yl)propan-1-ol (**3x**)

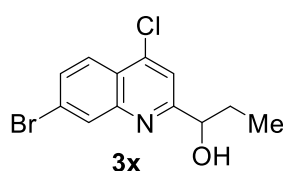

16.5 mg, 58% yield; pale colorless oil;  $^1H$  NMR ( $CDCl_3$ ):  $\delta$  = 8.26 (1H, d,  $J$  = 1.7 Hz), 8.05 (1H, d,  $J$  = 9.1 Hz), 7.69 (1H, dd,  $J$  = 1.7, 9.1 Hz), 7.45 (1H, s), 4.83-4.80 (1H, m), 4.38 (1H, d,  $J$  = 5.2 Hz), 2.02-1.93 (1H, m), 1.78-1.69 (1H, m), 0.95 (3H, t,  $J$  = 7.4 Hz);  $^{13}C$  NMR ( $CDCl_3$ ):  $\delta$  = 163.61, 147.85, 143.33, 131.44, 130.84, 125.52, 125.11, 124.36, 118.83, 73.62, 30.80, 9.22.; HRMS (ESI):  $m/z$  calcd for  $C_{12}H_{11}BrClINONa$

$[M+Na]^+$  321.9605. Found 321.9594; IR (Neat): 3390, 2965, 1603, 1487, 1276, 1112, 709  $cm^{-1}$

### 1-(8-methoxy-2-methylquinolin-4-yl)propan-1-ol (**3y**)

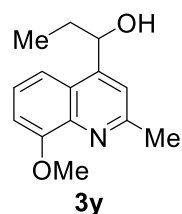

9.7 mg, 42% yield; brown oil;  $^1H$  NMR ( $CDCl_3$ ):  $\delta$  = 7.48-7.46 (2H, m), 7.39 (1H, dd,  $J$  = 8.2, 7.7 Hz), 7.02 (1H, d,  $J$  = 8.0 Hz), 5.35 (1H, dd,  $J$  = 8.4, 5.5 Hz), 4.05 (3H, s), 2.78 (3H, s),

2.02-1.93 (1H, m), 1.96-1.74 (1H, m), 1.02 (3H,  $J = 7.6$  Hz);  $^{13}\text{C}$  NMR ( $\text{CDCl}_3$ ):  $\delta = 157.11, 150.64, 148.31, 139.57, 130.49, 129.33, 128.76, 127.51, 126.08, 122.77, 115.25, 71.52, 31.12, 10.01$ .; HRMS (ESI):  $m/z$  calcd for  $\text{C}_{14}\text{H}_{17}\text{NO}_2$   $[\text{M}+\text{H}]^+$  232.1332. Found 232.1328; IR (Neat): 3373, 2931, 1725, 1261, 1094, 709  $\text{cm}^{-1}$

### 1-(2-phenylquinolin-4-yl)propan-1-ol (3z)

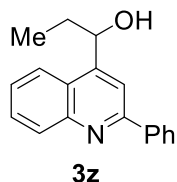

19.8 mg, 75% yield; yellow oil;  $^1\text{H}$  NMR ( $\text{CDCl}_3$ ):  $\delta = 8.18$  (1H, d,  $J = 8.3$  Hz), 8.12 (2H, d,  $J = 7.4$  Hz), 7.97 (1H, s), 7.93 (1H, d,  $J = 8.3$  Hz), 7.69 (1H, dd,  $J = 7.7, 6.9$  Hz), 7.50-7.42 (4H, m), 5.39 (1H, dd,  $J = 7.4, 4.6$  Hz), 2.34 (1H, brs), 2.04-1.96 (1H, m), 1.90-1.82 (1H, m), 1.05 (3H, t,  $J = 5.7$  Hz);  $^{13}\text{C}$  NMR ( $\text{CDCl}_3$ ):  $\delta = 157.11, 150.64, 148.31, 139.57, 130.49, 129.33, 129.21, 128.76, 127.51, 126.08, 124.48, 122.77, 115.25, 71.52, 31.12, 10.01$ .; HRMS (ESI):  $m/z$  calcd for  $\text{C}_{18}\text{H}_{18}\text{NO}$   $[\text{M}+\text{H}]^+$  264.1383. Found 264.1380; IR (Neat): 3392, 2963, 1596, 1081, 769  $\text{cm}^{-1}$

### 1-(6-(1-hydroxypropyl)pyridin-3-yl)ethan-1-one (3aa)

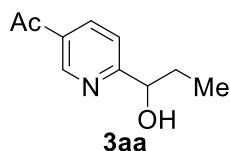

10.1 mg, 56% yield; colorless oil;  $^1\text{H}$  NMR ( $\text{CDCl}_3$ ):  $\delta = 9.07$  (1H, d,  $J = 1.8$  Hz), 8.22 (1H, dd,  $J = 8.4, 1.8$  Hz), 7.38 (1H, d,  $J = 8.4$  Hz), 4.75 (1H, dd,  $J = 7.3, 4.6$  Hz), 3.62 (1H, brs), 2.62 (3H, s), 1.97-1.81 (1H, m), 1.79-1.63 (1H, m), 0.93 (3H, t,  $J = 7.6$  Hz);  $^{13}\text{C}$  NMR ( $\text{CDCl}_3$ ):  $\delta = 196.26, 166.52, 148.56, 136.33, 131.26, 120.41, 73.91, 31.17, 26.74, 9.30$ .; HRMS (ESI):  $m/z$  calcd for  $\text{C}_{10}\text{H}_{12}\text{NO}_2\text{Na}$   $[\text{M}+\text{Na}]^+$  202.0838. Found 202.0848; IR (Neat): 3393, 2967, 1686 1595, 1113, 858  $\text{cm}^{-1}$

### 1-(5-bromo-6-(1-hydroxypropyl)pyridin-3-yl)ethan-1-one (3ab)

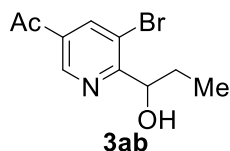

14.7 mg, 57% yield; pale yellow oil;  $^1\text{H}$  NMR ( $\text{CDCl}_3$ ):  $\delta = 9.00$  (1H, d,  $J = 1.7$  Hz), 8.36 (1H, d,  $J = 1.7$  Hz), 5.00-4.91 (1H, m), 4.06 (1H, d,  $J = 8.6$  Hz), 2.62 (3H, s), 1.97-1.86 (1H, m), 1.63-1.51 (1H, m), 0.99 (3H, t,  $J = 7.4$  Hz);  $^{13}\text{C}$  NMR ( $\text{CDCl}_3$ ):  $\delta = 194.90, 164.45, 146.76, 140.13, 132.53, 119.18, 72.79, 29.91, 26.81, 9.63$ .; HRMS (ESI):  $m/z$  calcd for  $\text{C}_{10}\text{H}_{13}\text{BrNO}_2\text{Na}$   $[\text{M}+\text{Na}]^+$  279.9944. Found 279.9949; IR (Neat): 3451, 2966, 1693 1583, 1112, 854  $\text{cm}^{-1}$

### 1-(6-(1-hydroxypropyl)-5-phenylpyridin-3-yl)ethan-1-one (3ac)

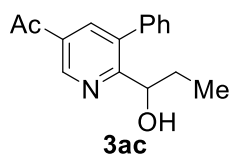

13.1 mg, 51% yield; pale yellow oil;  $^1\text{H}$  NMR ( $\text{CDCl}_3$ ):  $\delta = 9.09$  (1H, d,  $J = 2.0$  Hz), 8.06 (1H, d,  $J = 2.0$  Hz), 7.48-7.40 (3H, m), 7.32-7.26 (2H, m), 4.94-4.82 (1H, m), 4.20 (1H, d,  $J = 8.6$  Hz), 2.64 (3H, s), 1.58-1.49 (1H, m), 1.41-1.30 (1H, m), 0.71 (3H, t,  $J = 7.4$  Hz);  $^{13}\text{C}$  NMR ( $\text{CDCl}_3$ ):  $\delta = 196.35, 163.69, 147.31, 137.45, 137.38, 135.51, 131.04, 128.81, 128.79, 128.32, 71.15, 30.52, 26.83, 9.40$ .; HRMS (ESI):  $m/z$  calcd for  $\text{C}_{16}\text{H}_{17}\text{NO}_2\text{Na}$   $[\text{M}+\text{Na}]^+$  278.1151. Found 278.1155; IR (Neat): 3421, 2965, 1688, 1591, 1235, 704  $\text{cm}^{-1}$

### methyl 6-(1-hydroxypropyl)nicotinate (3ad)

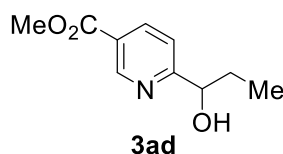

14.5 mg, 74% yield (inseparable mixture of regioisomers ( $\text{C}_6:\text{C}_2+\text{C}_4=3.9:1$ )); pale brown oil; Only the NMR spectrum of the major regioisomer is described.  $^1\text{H}$  NMR ( $\text{CDCl}_3$ ):  $\delta = 9.12$  (1H, d,  $J = 1.9$  Hz), 8.27 (1H, dd,  $J = 8.4, 1.9$  Hz), 7.35 (1H, d,  $J =$



8.4 Hz), 5.41 (1H, dd,  $J = 7.2, 4.3$  Hz), 3.93 (3H, s), 1.97-1.78 (1H, m), 1.79-1.65 (1H, m), 0.93 (3H, t,  $J = 7.4$  Hz);  $^{13}\text{C}$  NMR ( $\text{CDCl}_3$ ):  $\delta = 166.36, 165.52, 149.42, 137.86, 124.87, 120.09, 73.90, 52.42, 31.20, 9.30$ .; HRMS (ESI):  $m/z$  calcd for  $\text{C}_{10}\text{H}_{13}\text{NO}_3\text{Na}$   $[\text{M}+\text{Na}]^+$  218.0788. Found 218.0792; IR (Neat): 3393, 2965, 1731, 1600, 1121, 766  $\text{cm}^{-1}$

**(4S)-4-ethyl-4-hydroxy-11-(1-hydroxypropyl)-1,12-dihydro-14H-pyrano[3',4':6,7]indolizino[1,2-b]quinoline-3,14(4H)-dione (3ae)**

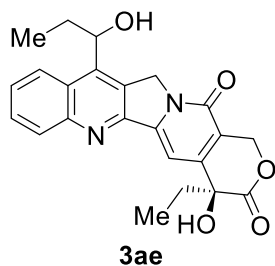

17.2 mg, 42% yield (inseparable mixture of diastereomers (A:B=1:1)); yellow solid;  $^1\text{H}$  NMR ( $\text{DMSO}-d_6$ ):  $\delta = 8.35-8.21$  (1H, m, A+B), 8.20-8.10 (1H, m, A+B), 7.90-7.76 (1H, m, A+B), 7.73-7.60 (1H, m, A+B), 7.33 (1H, s, A+B), 6.52 (1H, s, A), 5.92 (1H, s, B), 5.64-5.52 (1H, m, A+B), 5.51-5.29 (4H, m, A+B), 3.41-3.19 (1H, m, A+B), 1.97-1.56 (4H, m, A+B), 0.99 (3H, t,  $J = 7.2$  Hz, A+B), 0.93-0.78 (3H, m, A+B);  $^{13}\text{C}$  NMR ( $\text{DMSO}-d_6$ ):  $\delta = 172.53, 172.47, 156.80, 152.68, 152.65, 149.95, 148.32, 148.30, 147.21, 145.29, 129.90, 129.84, 127.45, 126.33, 125.14, 124.46, 124.40, 118.94, 96.42, 72.40, 72.31, 69.77, 69.72, 65.27, 51.20, 51.17, 30.24, 30.16, 30.10, 10.18, 10.16, 7.79, 7.74$ .; HRMS (ESI):  $m/z$  calcd for  $\text{C}_{23}\text{H}_{22}\text{N}_2\text{O}_5\text{Na}$   $[\text{M}+\text{Na}]^+$  429.1421. Found 429.1434; IR (Neat): 3420, 2962, 2852, 1748, 1654, 1260, 1026, 799  $\text{cm}^{-1}$

**(4-((1-(1-hydroxypropyl)isoquinolin-5-yl)sulfonyl)-1,4-diazepan-1-yl)(phenyl)methanone (3af)**

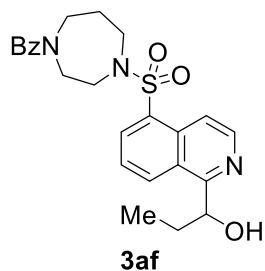

44.9 mg, 99% yield; brown oil;  $^1\text{H}$  NMR ( $\text{CD}_3\text{OD}$ ):  $\delta = 8.78$  (1H, dd,  $J = 16.6, 8.6$  Hz), 8.58 (1H, dd,  $J = 14.9, 6.3$  Hz), 8.50-8.26 (2H, m), 7.87-7.71 (1H, m), 7.49-7.18 (5H, m), 5.49-5.34 (1H, m), 3.92-3.70 (2H, m), 3.68-3.40 (6H, m), 2.08-1.62 (4H, m), 1.02-0.92 (3H, m);  $^{13}\text{C}$  NMR ( $\text{CDCl}_3$ ):  $\delta = 171.76, 171.65, 162.43, 142.23, 135.91, 135.06, 132.96, 132.87, 132.25, 129.86, 129.68, 128.54, 126.45, 126.28, 125.87, 125.60, 117.01, 70.91, 51.76, 50.55, 48.58, 48.31, 48.19, 47.96, 46.59, 44.92, 32.25, 29.74, 27.58, 9.74$ .; HRMS (ESI):  $m/z$  calcd for  $\text{C}_{24}\text{H}_{27}\text{N}_3\text{O}_4\text{SNa}$   $[\text{M}+\text{Na}]^+$  476.1614. Found 476.1619; IR (Neat): 3393, 2965, 1626, 1422, 1327, 1150, 731  $\text{cm}^{-1}$

**4-hydroxy-4-(isoquinolin-1-yl)butyl 3-(4,5-diphenyloxazol-2-yl)propanoate (3ag)**

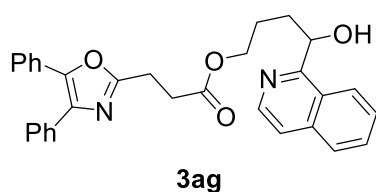

36.5 mg, 74% yield; colorless oil;  $^1\text{H}$  NMR ( $\text{CDCl}_3$ ):  $\delta = 8.41$  (1H, d,  $J = 5.7$  Hz), 7.98 (1H, d,  $J = 8.6$  Hz), 7.84 (1H, d,  $J = 8.0$  Hz), 7.71-7.63 (1H, m), 7.63-7.49 (6H, m), 7.36-7.25 (6H, m), 5.53-5.38 (1H, m), 5.16 (1H, brs), 4.26-4.05 (2H, m), 3.13 (2H, t,  $J = 7.6$  Hz), 2.85 (2H, t,  $J = 7.6$  Hz), 2.16-1.52 (4H, m);  $^{13}\text{C}$  NMR ( $\text{CDCl}_3$ ):  $\delta = 171.97, 161.69, 160.76, 145.35, 140.30, 136.42, 135.07, 132.41, 130.30, 128.93, 128.58, 128.49, 128.39, 127.99, 127.84, 127.55, 127.43, 126.41, 124.65, 123.91, 120.58, 68.89, 64.61, 35.21, 31.09, 24.59, 23.49$ .; HRMS (ESI):  $m/z$  calcd for  $\text{C}_{31}\text{H}_{28}\text{N}_2\text{O}_4\text{Na}$   $[\text{M}+\text{Na}]^+$  515.1941. Found 515.1926; IR (Neat): 3419, 2923, 1733, 1504, 1175, 764  $\text{cm}^{-1}$

#### 4-hydroxy-4-(isoquinolin-1-yl)butyl 2-(4-((2-oxocyclopentyl)methyl)phenyl)propanoate (**3ah**)

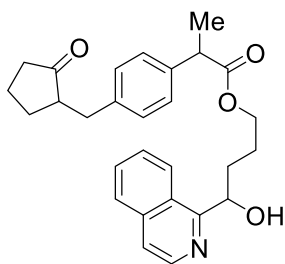

**3ah**

24.9 mg, 56% yield; yellow oil;  $^1\text{H NMR}$  ( $\text{CDCl}_3$ ):  $\delta$  = 8.42 (1H, d,  $J$  = 6.3 Hz), 7.94 (1H, d,  $J$  = 8.6 Hz), 7.87 (1H, d,  $J$  = 8.6 Hz), 7.72-7.67 (1H, m), 7.63-7.50 (2H, m), 7.13 (2H, d,  $J$  = 6.9 Hz), 7.05-6.95 (2H, m), 5.45-5.36 (1H, m), 4.23-3.94 (2H, m), 3.70-3.47 (1H, m), 3.13-2.89 (1H, m), 2.48-2.34 (1H, m), 2.35-2.17 (2H, m), 2.08-1.80 (5H, m), 1.44-1.36 (3H, m);  $^{13}\text{C NMR}$  ( $\text{CDCl}_3$ ):  $\delta$  = 220.21, 174.59, 160.79, 140.30, 138.72, 138.33, 136.42, 130.30, 128.99, 127.57, 127.45, 127.38, 124.63, 123.92, 120.57, 77.26, 76.74, 68.92, 64.50, 50.93, 45.10, 45.07, 38.13, 35.26, 35.20,

35.13, 29.16, 24.68, 20.48, 18.43, 18.35.; HRMS (ESI):  $m/z$  calcd for  $\text{C}_{28}\text{H}_{31}\text{NO}_4\text{Na}$   $[\text{M}+\text{Na}]^+$  468.2145. Found 468.2130; IR (Neat): 3436, 2960, 1731, 1512, 1337, 1163, 749  $\text{cm}^{-1}$

#### 4-hydroxy-4-(isoquinolin-1-yl)butyl

#### (4*R*)-4-(((5*S*,8*R*,9*S*,10*S*,13*R*,14*S*,17*R*)-10,13-dimethyl-3,7,12-trioxohexadecahydro-1*H*-cyclopenta[*a*]phenanthren-17-yl)pentanoate (**3ai**)

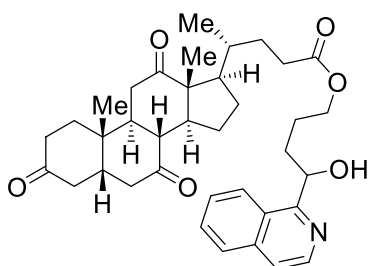

**3ai**

40.4 mg, 67% yield; pale yellow solid;  $^1\text{H NMR}$  ( $\text{CDCl}_3$ ):  $\delta$  = 8.43 (1H, d,  $J$  = 5.7 Hz), 8.02 (1H, d,  $J$  = 8.0 Hz), 7.91-7.81 (1H, m), 7.75-7.68 (1H, m), 7.66-7.56 (2H, m), 5.55-5.40 (1H, m), 5.20 (1H, brs), 4.17-4.01 (2H, m), 2.94-2.73 (3H, m), 2.39-1.51 (21H, m), 1.44-1.11 (7H, m), 1.02-0.98 (3H, m), 0.85-0.71 (3H, m);  $^{13}\text{C NMR}$  ( $\text{CDCl}_3$ ):  $\delta$  = 211.94, 211.92, 209.05, 208.71,

174.03, 174.00, 161.06, 161.04, 139.15, 136.67, 131.00, 127.81, 127.68, 127.65, 124.62, 124.25, 120.96, 68.92, 63.96, 56.82, 51.69, 48.92, 46.77, 45.57, 45.49, 44.92, 42.73, 38.57, 36.42, 35.95, 35.39, 35.23, 35.20, 31.45, 31.43, 30.39, 27.55, 27.52, 25.05, 25.04, 24.74, 21.85, 18.57, 11.77, 11.75.; HRMS (ESI):  $m/z$  calcd for  $\text{C}_{37}\text{H}_{47}\text{NO}_6\text{Na}$   $[\text{M}+\text{Na}]^+$  624.3296. Found 624.3272; IR (Neat): 3398, 2960, 1710, 1383, 1173, 913, 732  $\text{cm}^{-1}$

#### benzyl ((3*S*)-5-(isoquinolin-1-yl)-2-oxotetrahydrofuran-3-yl)carbamate (**3aj'**)

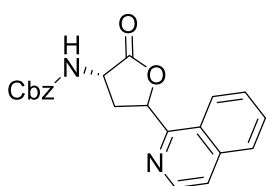

**3aj'**

Due to instability of **3aj** for  $\text{SiO}_2$ , **3aj** was isolated as the lactone (**3aj'**). The procedure is as follows. Isoquinoline (**1a**) (12.9 mg, 0.10 mmol), methyl (*S*)-2-(((benzyloxy)carbonyl)amino)-4-oxobutanoate (**2aj**) (31.8 mg, 0.12 mmol), Mes-Acr<sup>+</sup> (2.0 mg, 0.005 mmol), TPA (3.6 mg, 0.010 mmol), and TFA (15.3  $\mu\text{L}$ , 0.20 mmol) were dissolved in degassed  $\text{CH}_2\text{Cl}_2$  (2.0 mL) in a screw-capped vial under argon atmosphere. The vial was subjected to blue LED irradiation for 3 hours under

temperature control (ca. 27–29  $^\circ\text{C}$ ). Then, the reaction mixture was passed through a pad of alumina eluting with  $\text{CH}_2\text{Cl}_2$  and EtOAc. Then, the solvent was removed under reduced pressure. To a solution of the residue in  $\text{CH}_2\text{Cl}_2$  (2.0 mL),  $\text{SiO}_2$  (1.0 g) was added. After 4 hours of stirring, the solvent was removed under reduced pressure. The crude material was purified by a  $\text{SiO}_2$  flash column chromatography with EtOAc and *n*-hexane to afford **3aj'** (18.4 mg, 0.051 mmol) in 51% yield (dr=1.1/1) as white solid.

major isomer:  $^1\text{H NMR}$  ( $\text{CDCl}_3$ ):  $\delta$  = 8.48 (1H, d,  $J$  = 5.7 Hz), 8.17 (1H, d,  $J$  = 8.0 Hz), 7.86 (1H, d,  $J$  = 8.0 Hz), 7.74-7.68 (1H, m), 7.67-7.61 (2H, m), 7.42-7.27 (5H, m), 6.46 (1H, d,  $J$  = 8.6 Hz), 5.33 (1H, brs), 5.13 (2H, s), 5.01-4.86 (1H, m), 3.51-3.36 (1H, m), 2.80-2.64 (1H, m);  $^{13}\text{C NMR}$  ( $\text{CDCl}_3$ ):  $\delta$  = 175.24, 155.93, 154.95, 141.62, 136.57, 135.97, 130.41, 128.58, 128.31, 128.25, 128.02, 127.59, 126.23, 124.05, 121.84, 75.23, 67.35, 50.33,

33.23.; HRMS (ESI):  $m/z$  calcd for  $C_{21}H_{18}N_2O_4Na$   $[M+Na]^+$  385.1159. Found 385.1164; IR (Neat): 3334, 1784, 1716, 1523, 1261, 829  $cm^{-1}$

minor isomer:  $^1H$  NMR ( $CDCl_3$ ):  $\delta$  = 8.51 (1H, d,  $J$  = 5.2 Hz), 8.24 (1H, d,  $J$  = 8.6 Hz), 7.87 (1H, d,  $J$  = 8.0 Hz), 7.77-7.59 (3H, m), 7.41-7.26 (5H, m), 6.27 (1H, t,  $J$  = 7.4 Hz), 5.78 (1H, d,  $J$  = 6.9 Hz), 5.24-5.04 (2H, m), 4.94-4.80 (1H, m), 3.22-2.92 (2H, m);  $^{13}C$  NMR ( $CDCl_3$ ):  $\delta$  = 174.17, 156.07, 153.83, 141.51, 136.62, 136.01, 130.55, 128.56, 128.27, 128.16, 128.16, 127.51, 126.98, 124.32, 122.27, 75.91, 67.34, 51.04, 33.54.; HRMS (ESI):  $m/z$  calcd for  $C_{21}H_{18}N_2O_4Na$   $[M+Na]^+$  385.1159. Found 385.1160; IR (Neat): 3288, 1780, 1685, 1541, 1338, 913  $cm^{-1}$

**(3*R*,4*S*,5*S*,6*R*)-6-((benzoyloxy)methyl)-5-((5-hydroxy-5-(isoquinolin-1-yl)pentanoyl)oxy)-2-methoxytetrahydro-2*H*-pyran-3,4-diyl dibenzoate (3ak)**

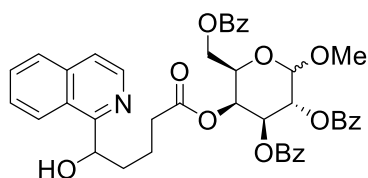

**3ak**

The reaction was conducted at 0.035 mmol scale. 19.0 mg, 79% yield (inseparable mixture of diastereomers (A:B=1.1:1)); colorless oil;  $^1H$  NMR ( $CDCl_3$ ):  $\delta$  = 8.40 (1H, d,  $J$  = 5.7 Hz, A), 8.33 (1H, d,  $J$  = 5.7 Hz, B), 8.05-7.80 (7H, m, A+B), 7.71 (1H, d,  $J$  = 8.6 Hz, A+B), 7.69-7.62 (1H, m, A+B), 7.60-7.48 (4H, m, A+B), 7.44-7.30 (5H, m, A+B), 7.29-7.21 (1H, m, A+B)

7.10-7.04 (1H, m, A+B), 5.85-5.73 (2H, m, A+B), 5.64-5.49 (1H, m, A+B), 5.44-5.32 (1H, m, A+B), 5.26-5.18 (1H, m, A+B), 5.11 (1H, brs, A+B), 4.55-4.43 (2H, m), 4.36-4.23 (1H, m, A+B), 3.42 (3H, m, A+B), 2.58-2.44 (2H, m, A+B), 2.06-1.71 (3H, m, A+B), 1.70-1.45 (1H, m, A+B);  $^{13}C$  NMR ( $CDCl_3$ ):  $\delta$  = 172.42, 165.99, 165.46, 160.89, 160.75, 140.31, 136.39, 133.32, 133.20, 132.97, 130.26, 129.85, 129.69, 129.67, 129.59, 129.51, 129.44, 129.23, 128.45, 128.43, 128.41, 128.29, 128.10, 127.43, 124.68, 124.02, 123.96, 120.50, 120.43, 97.54, 97.51, 77.32, 77.20, 76.68, 69.21, 69.11, 68.33, 68.27, 66.59, 66.54, 62.28, 55.64, 53.40, 38.23, 38.14, 33.76, 21.22, 21.03.; HRMS (ESI):  $m/z$  calcd for  $C_{42}H_{39}NO_{11}Na$   $[M+Na]^+$  756.2415. Found 756.2379; IR (Neat): 3421, 2933, 1725, 1451, 1270, 1070, 710  $cm^{-1}$

## 9. References

1. Hu, X.; Li, G.-X.; He, G.; Chen, G. *Org. Chem. Front.* **2019**, *6*, 3205-3209.
2. Fuse, H.; Mitsunuma, H.; Kanai, M. *J. Am. Chem. Soc.* **2020**, *142*, 4493-4499.
3. Lang, C. S.; Wong, S. H.; Chow, S.; Challinor, V. L.; Yong, K. W.; Fletcher, M. T.; Arthur, D. M.; Ng, J. C.; De Voss, J. J. *Org. Biomol. Chem.* **2016**, *14*, 6826-6832.
4. Ottersbach, P. A.; Schmitz, J.; Schnakenburg, G.; Gütschow, M. *Org. Lett.* **2013**, *15*, 448-451.
5. Bieszczad, B.; Perego, L. A.; Melchiorre, P. *Angew. Chem., Int. Ed.* **2019**, *58*, 16878-16883.
6. Wang, B.; Zhou, H.; Lu, G.; Liu, Q.; Jiang, X. *Org. Lett.* **2017**, *19*, 2094-2097.
7. Niu, L.; Jiamei Liu, J.; Liang, X.-A.; Wang, S.; Lei, A. *Nat. Commun.* **2019**, *10*, 467.
8. Zhao, H.; Li, Z.; Jin, J. *New J. Chem.* **2019**, *43*, 12533-12537.
9. Wang, S.; Xing, S.; Zhang, Y.; Fan, Y.; Zhao, H.; Wang, J.; Zhang, S.; Wang, W. *RSC Adv.*, **2019**, *9*, 41847-41850.

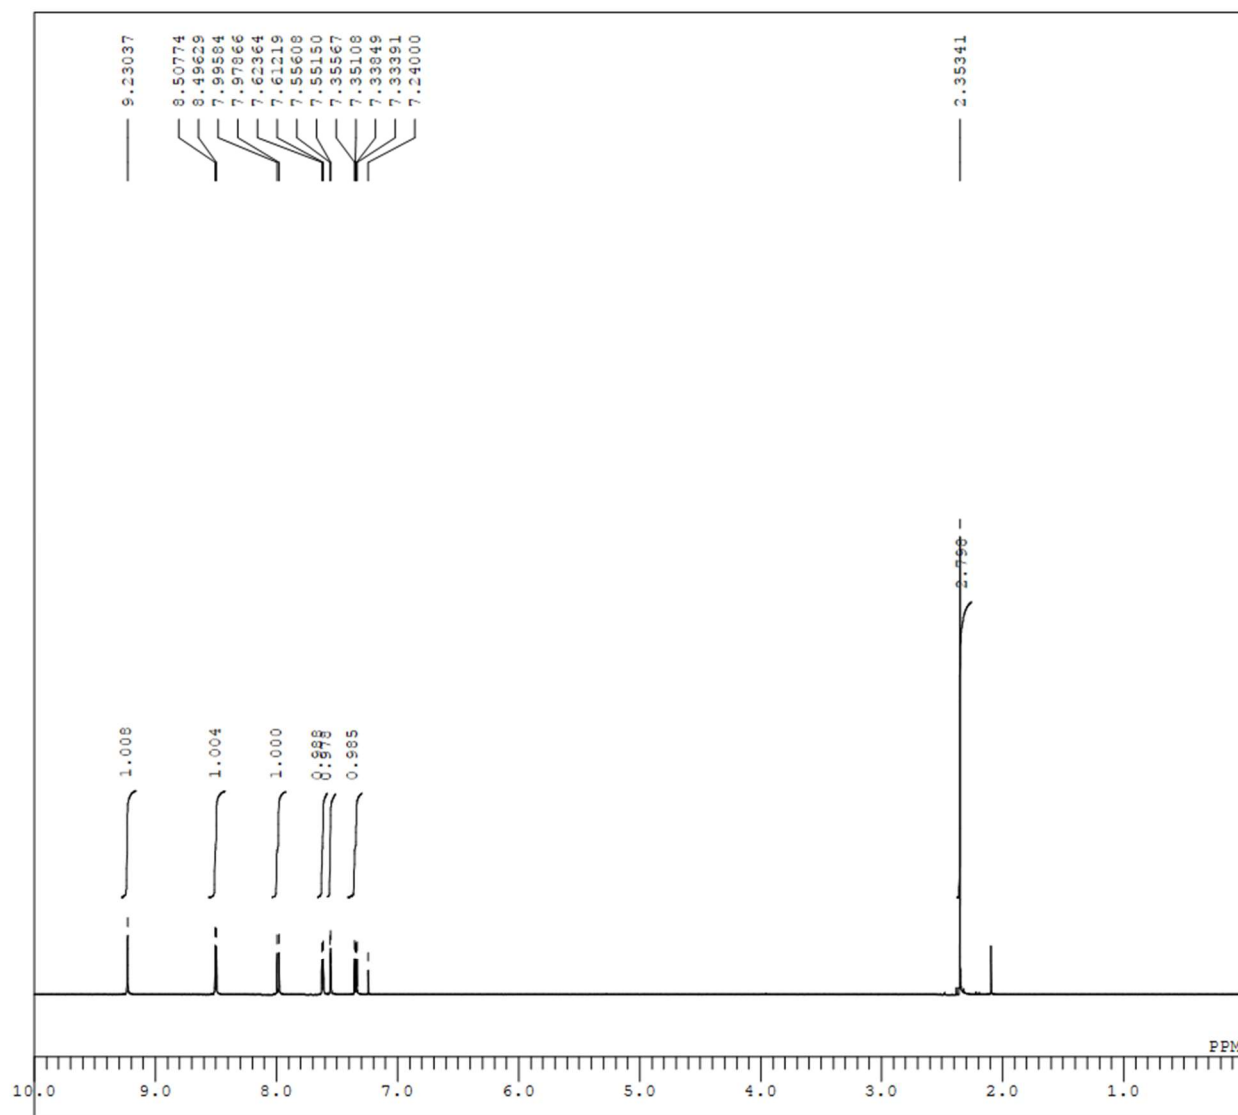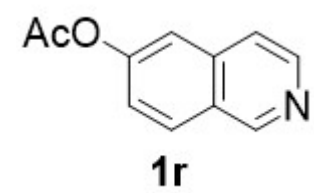

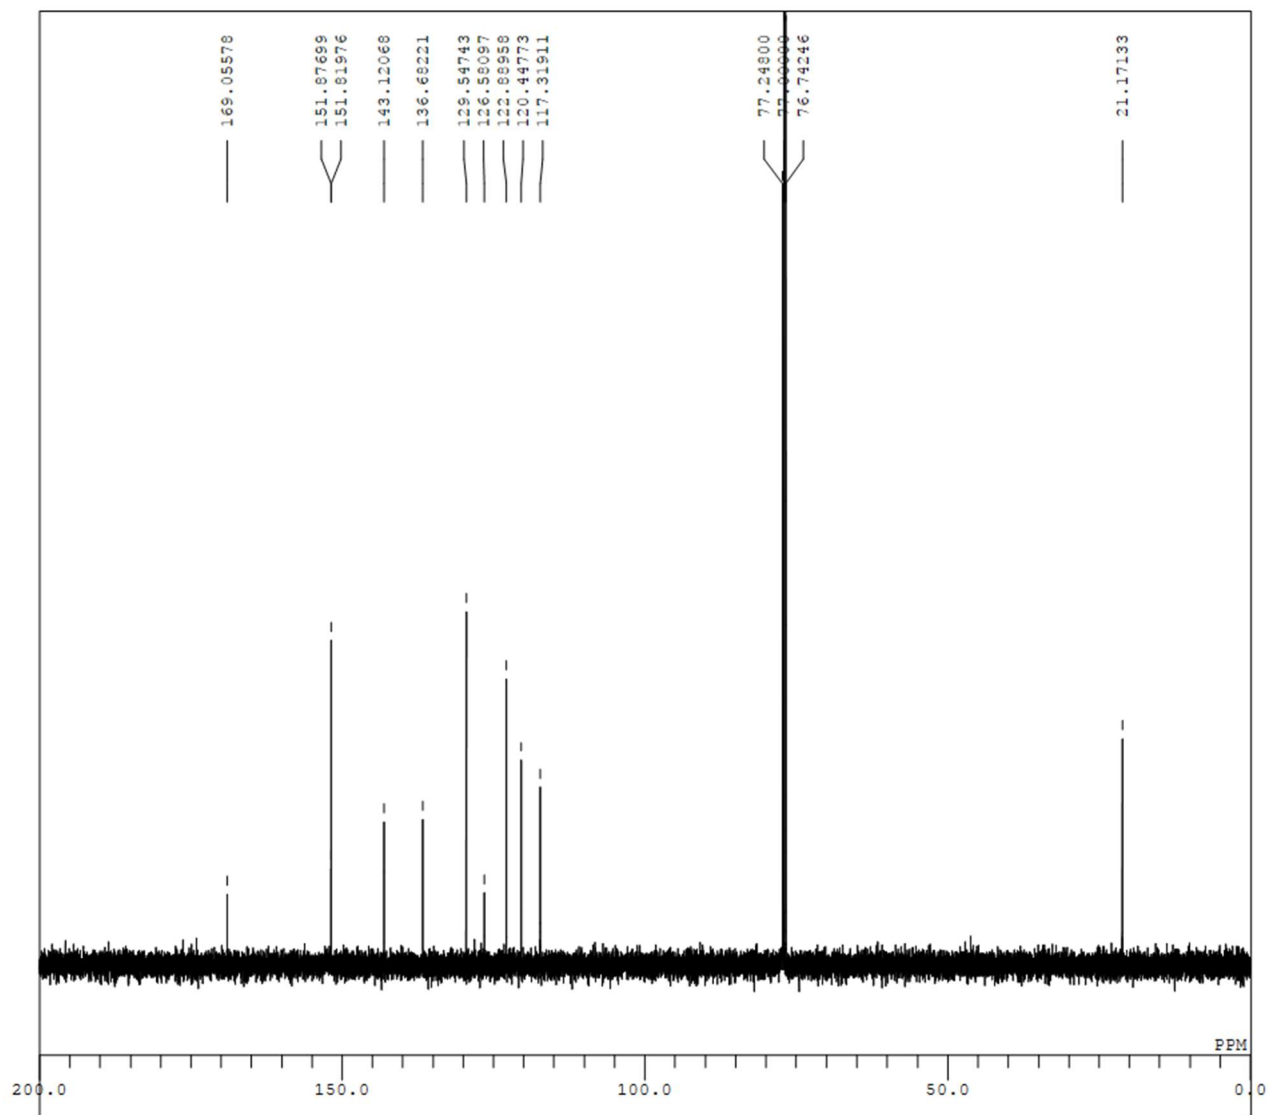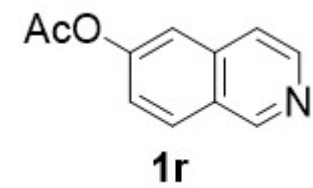

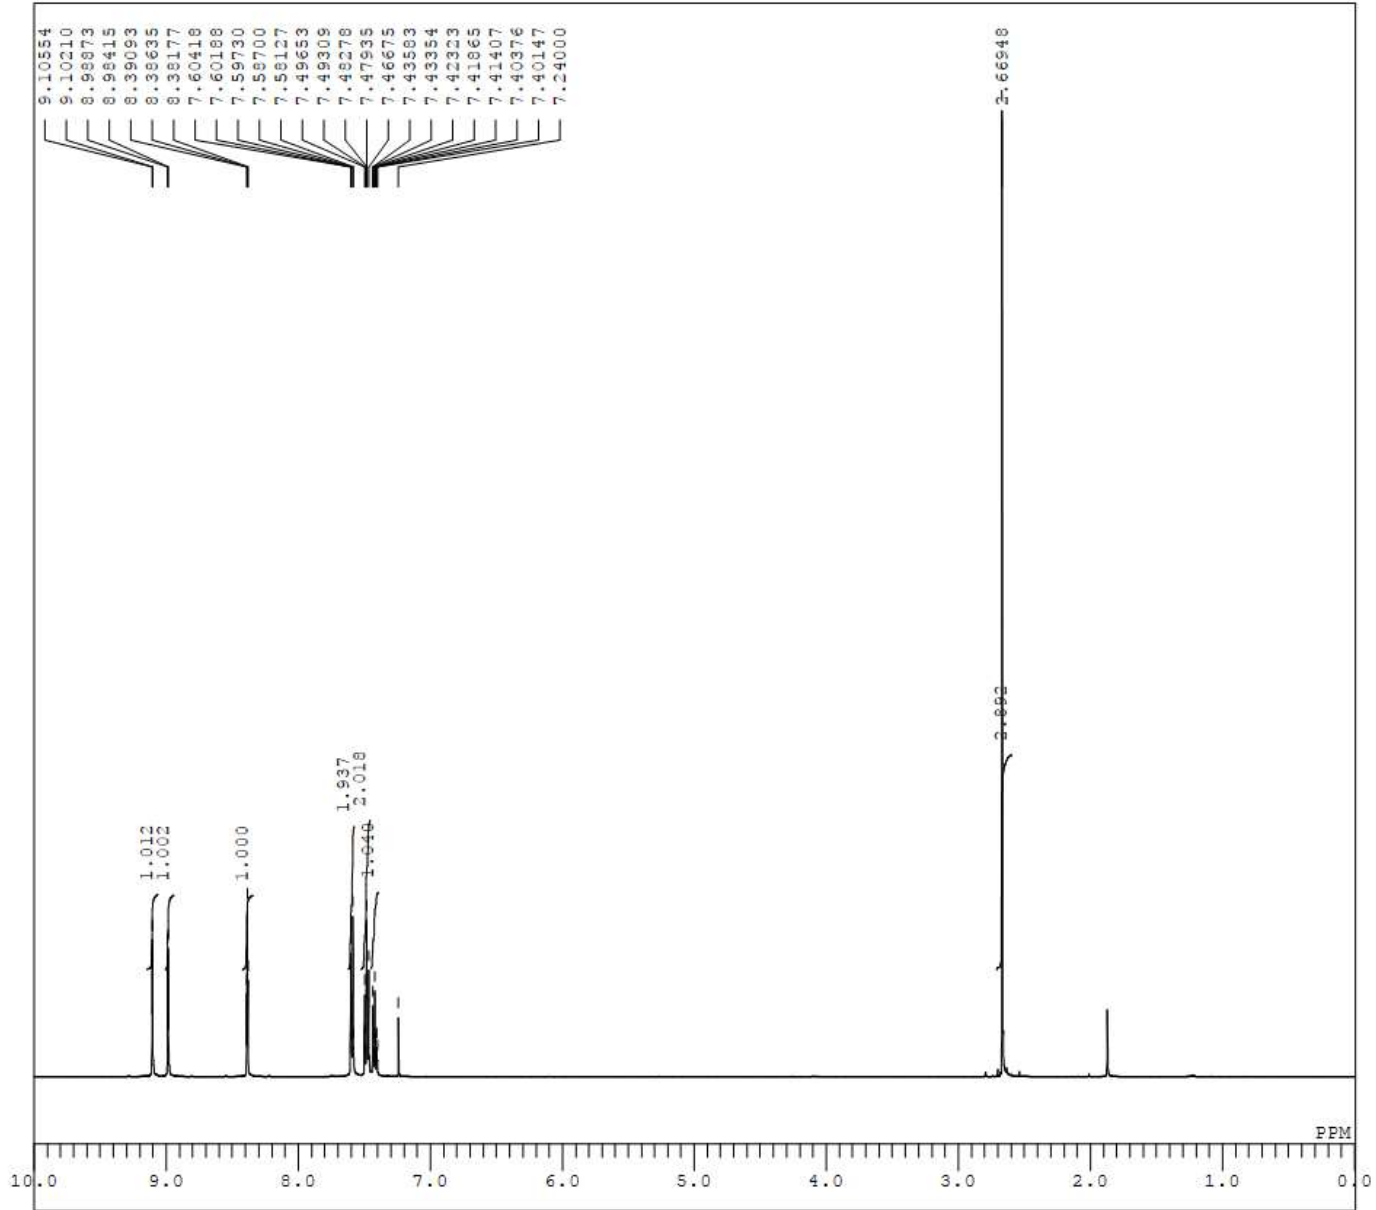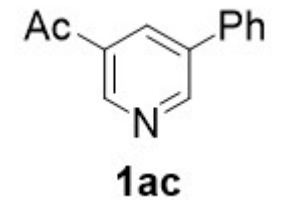

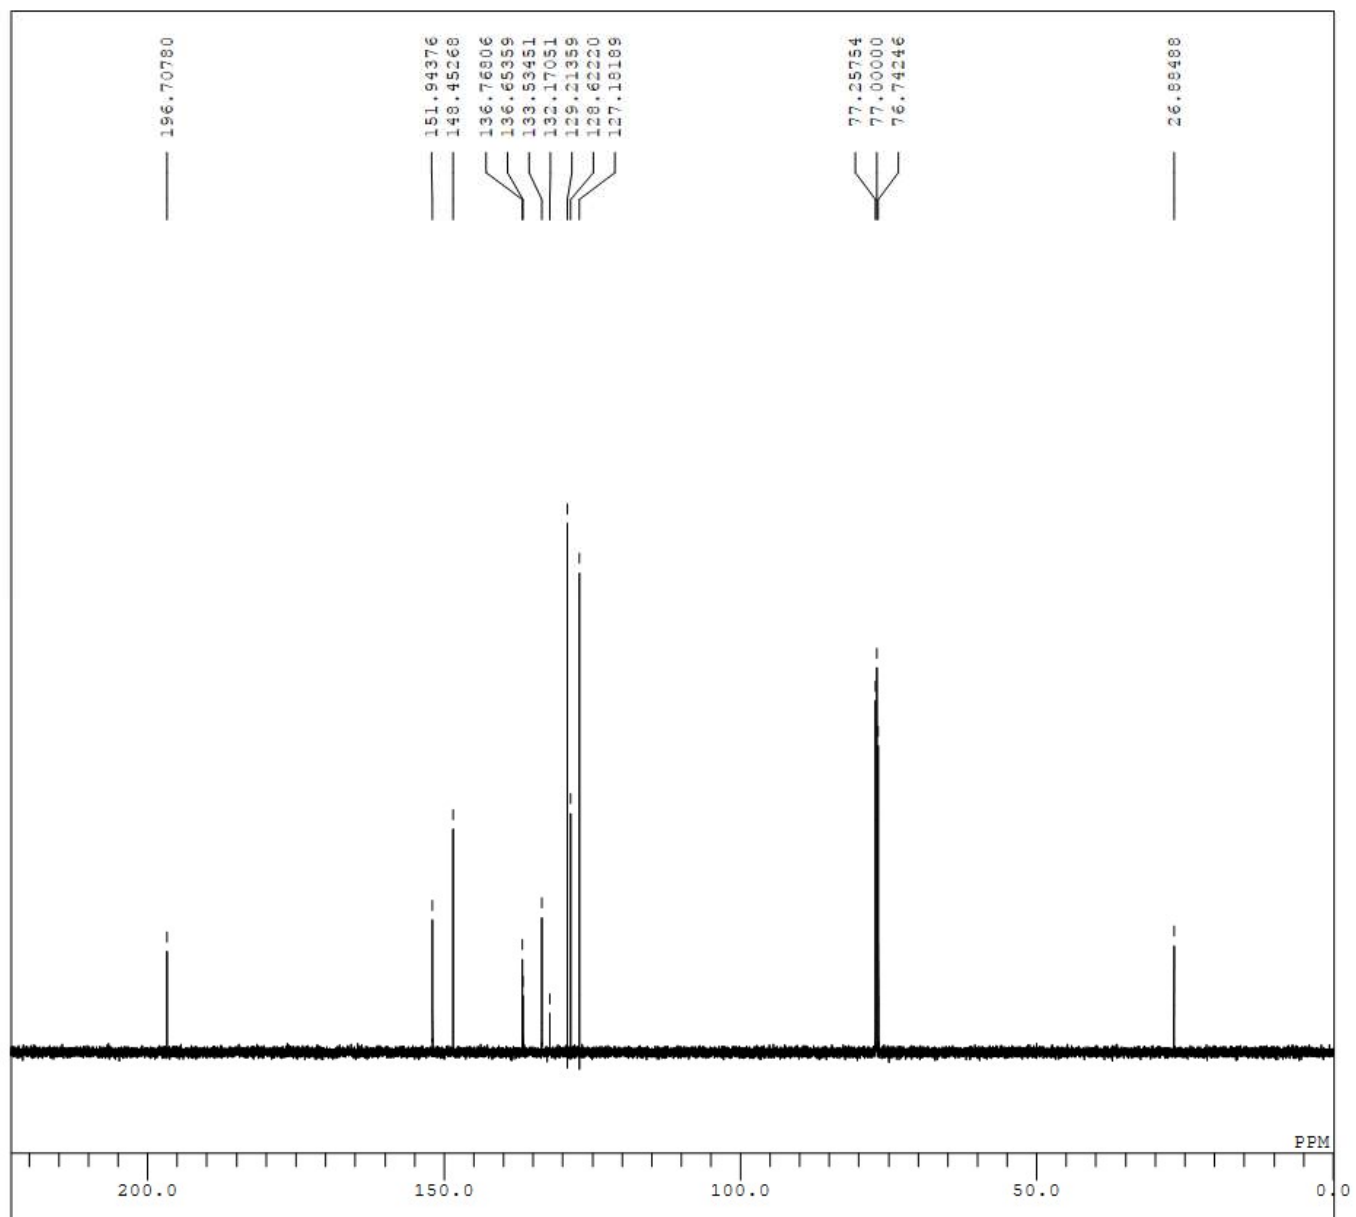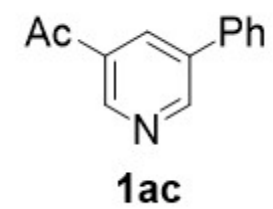

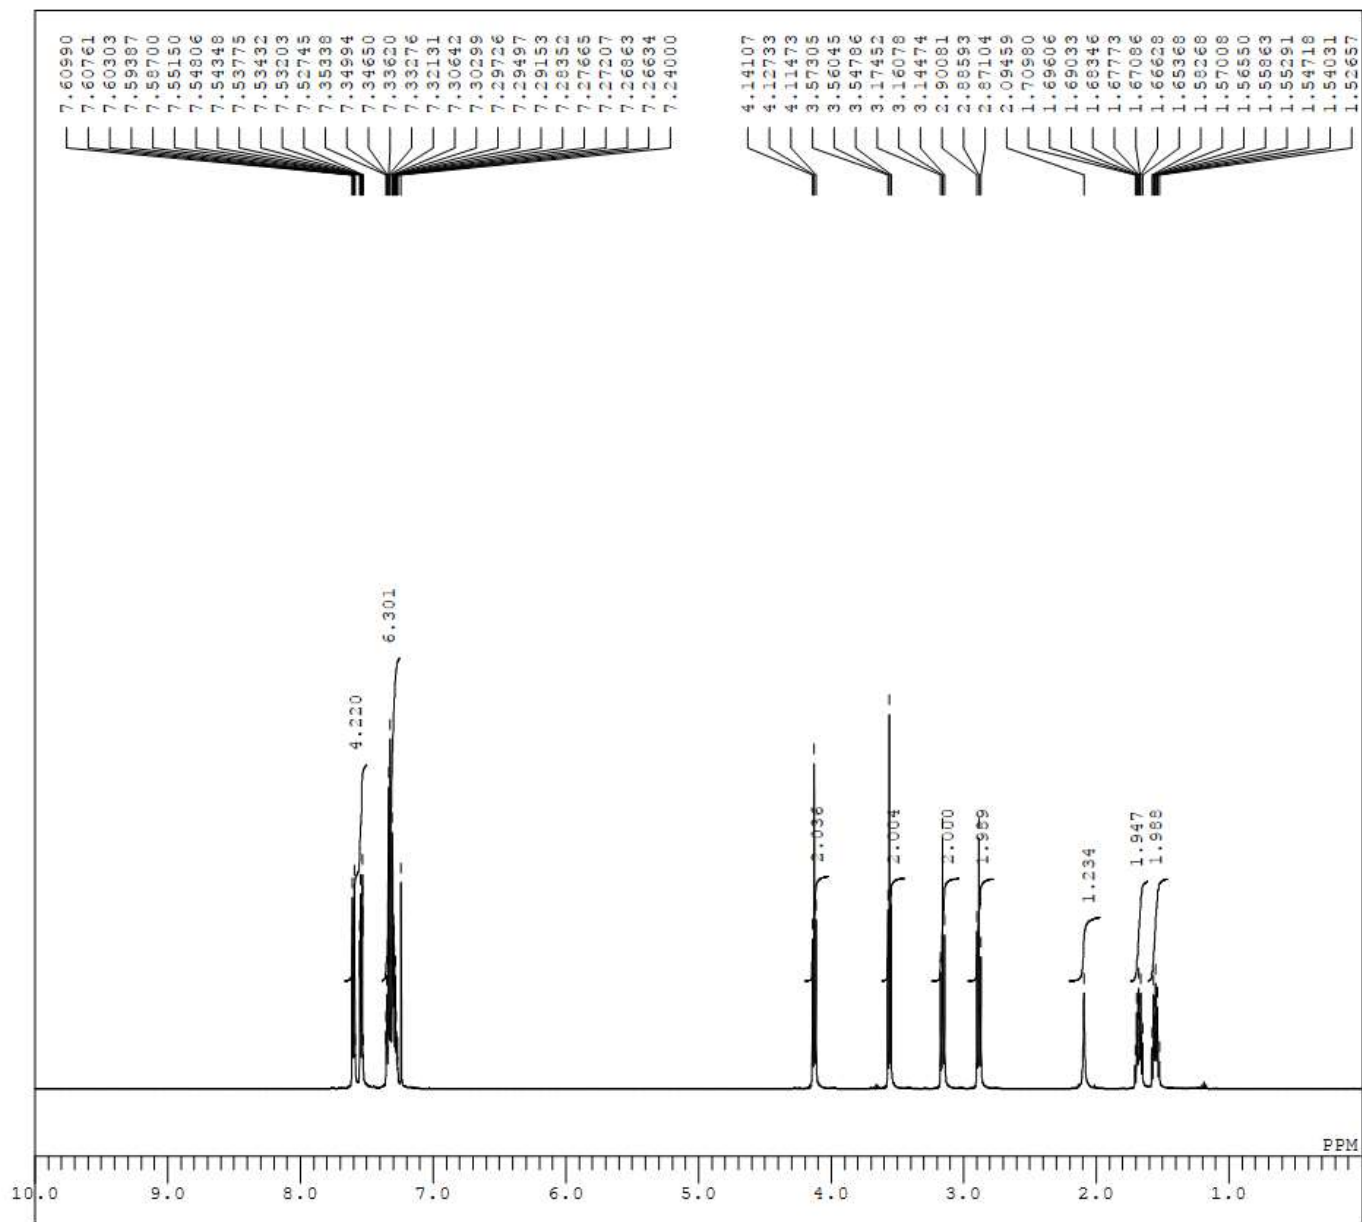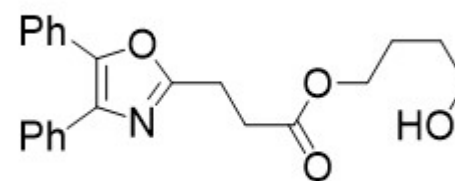

**S1**



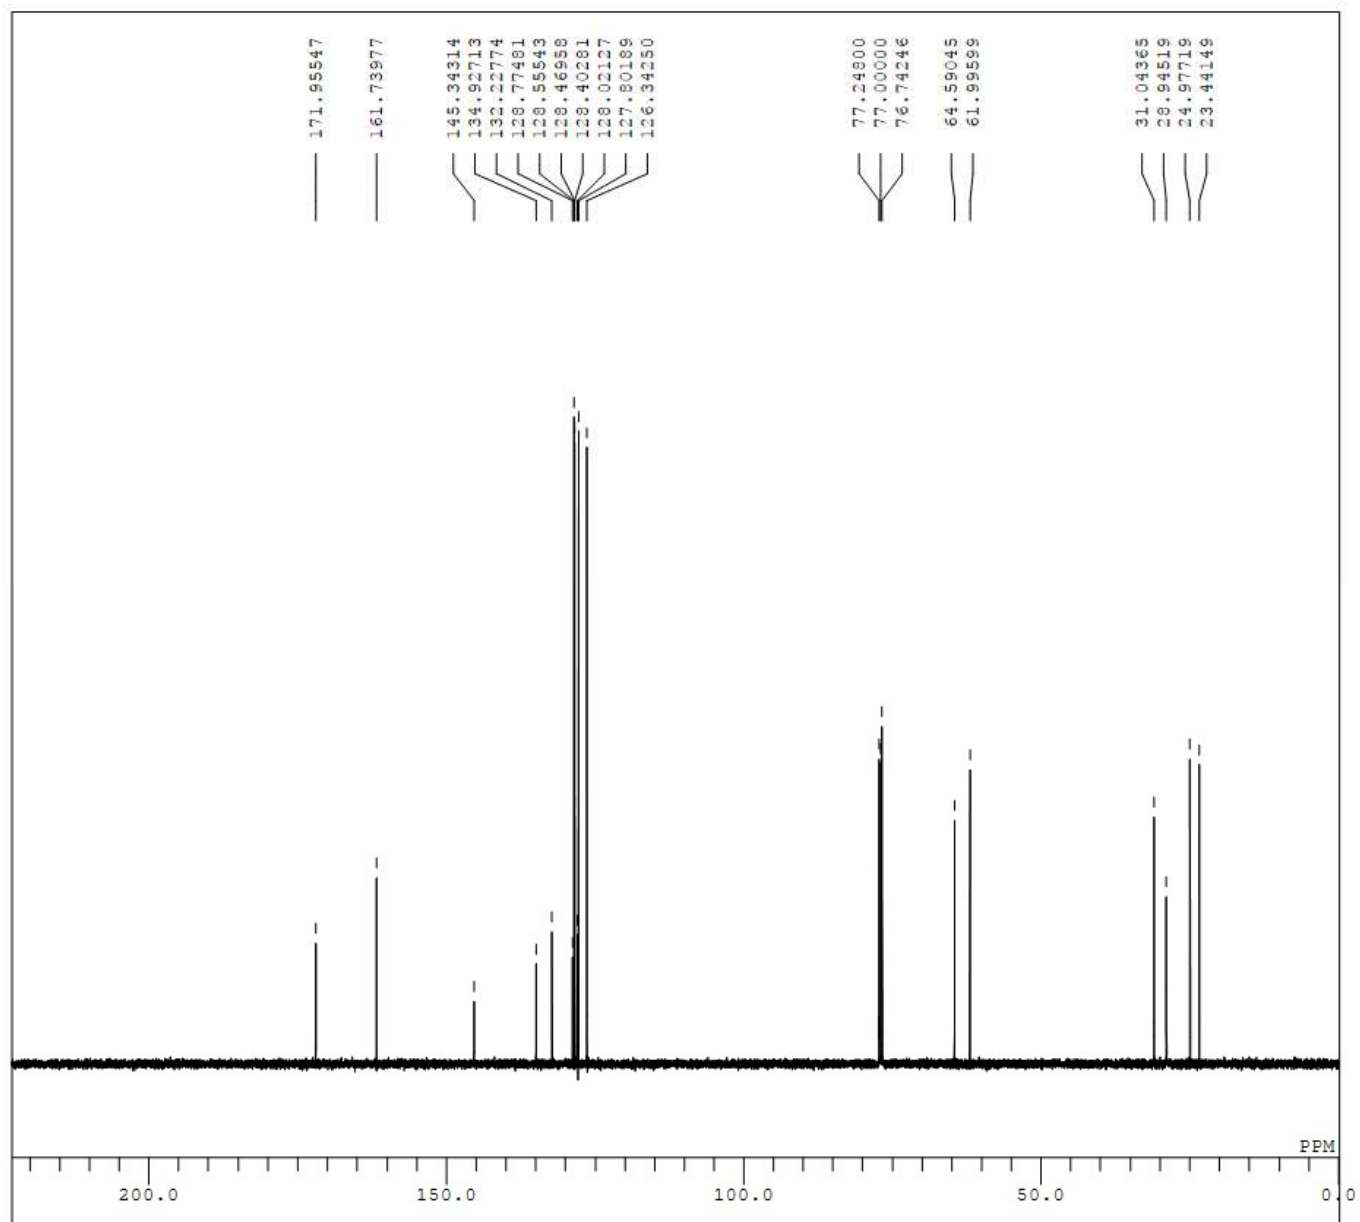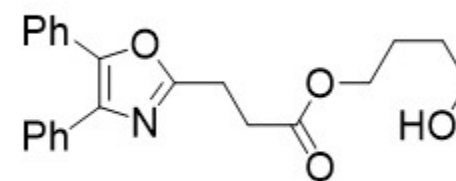

**S1**

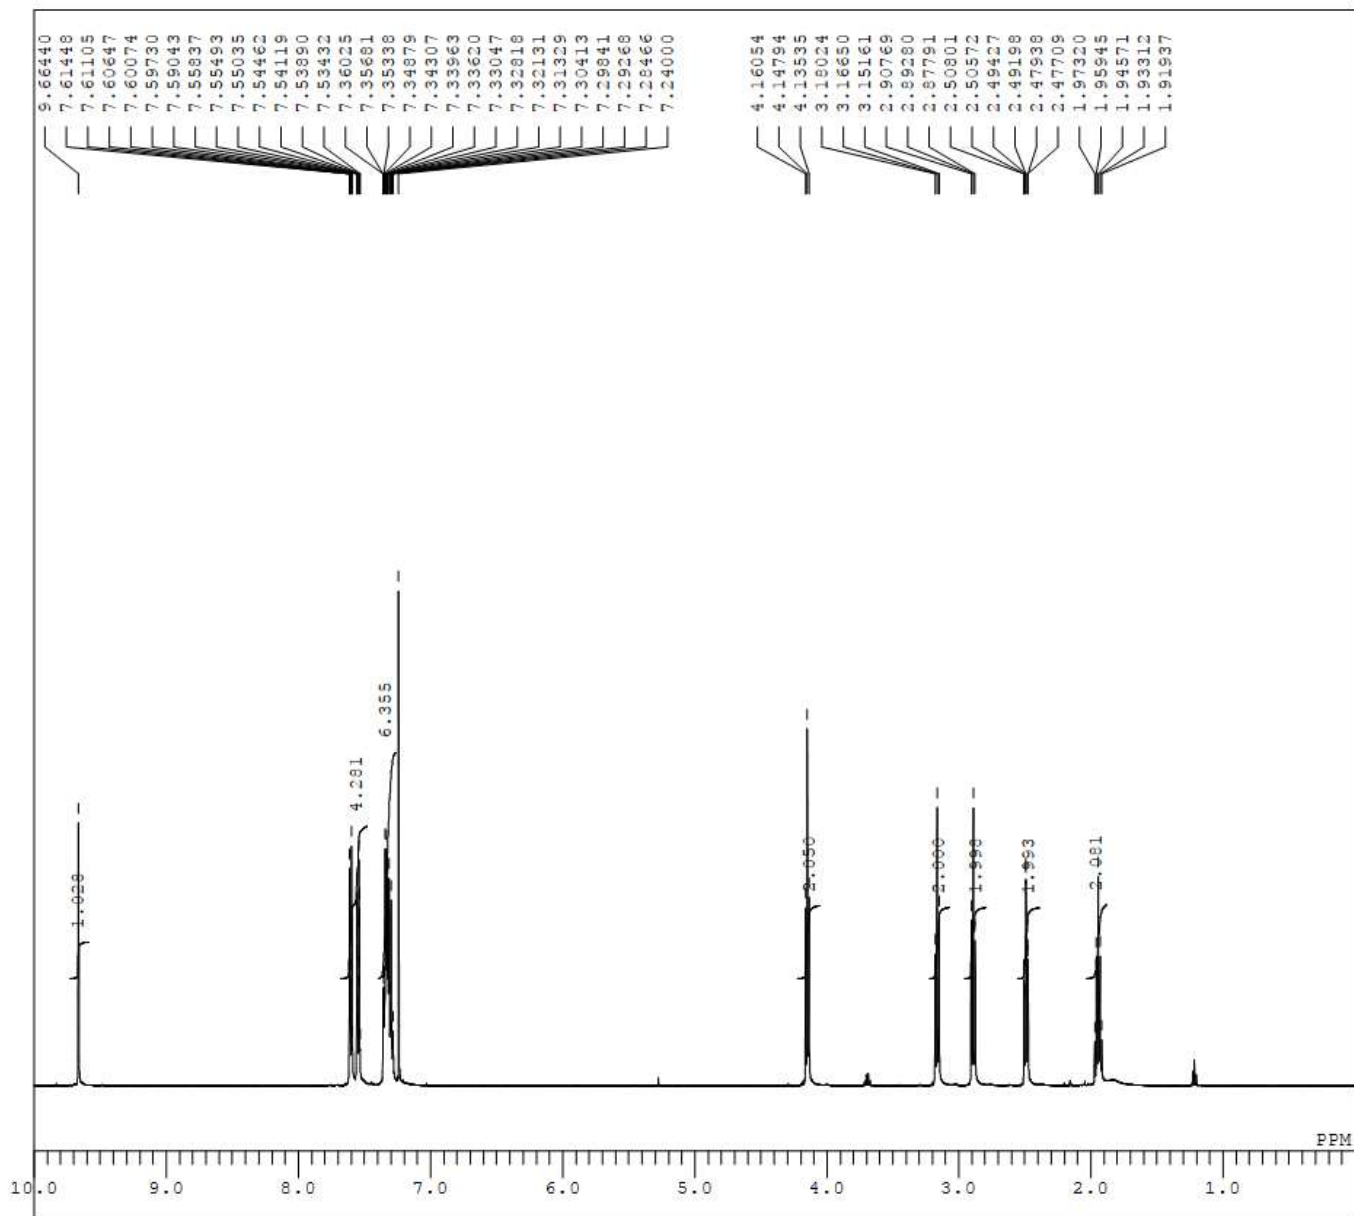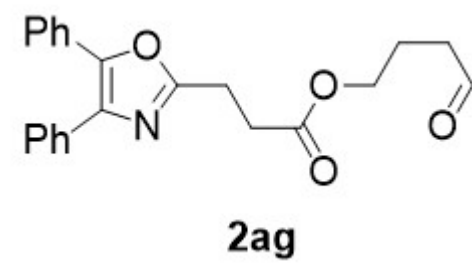

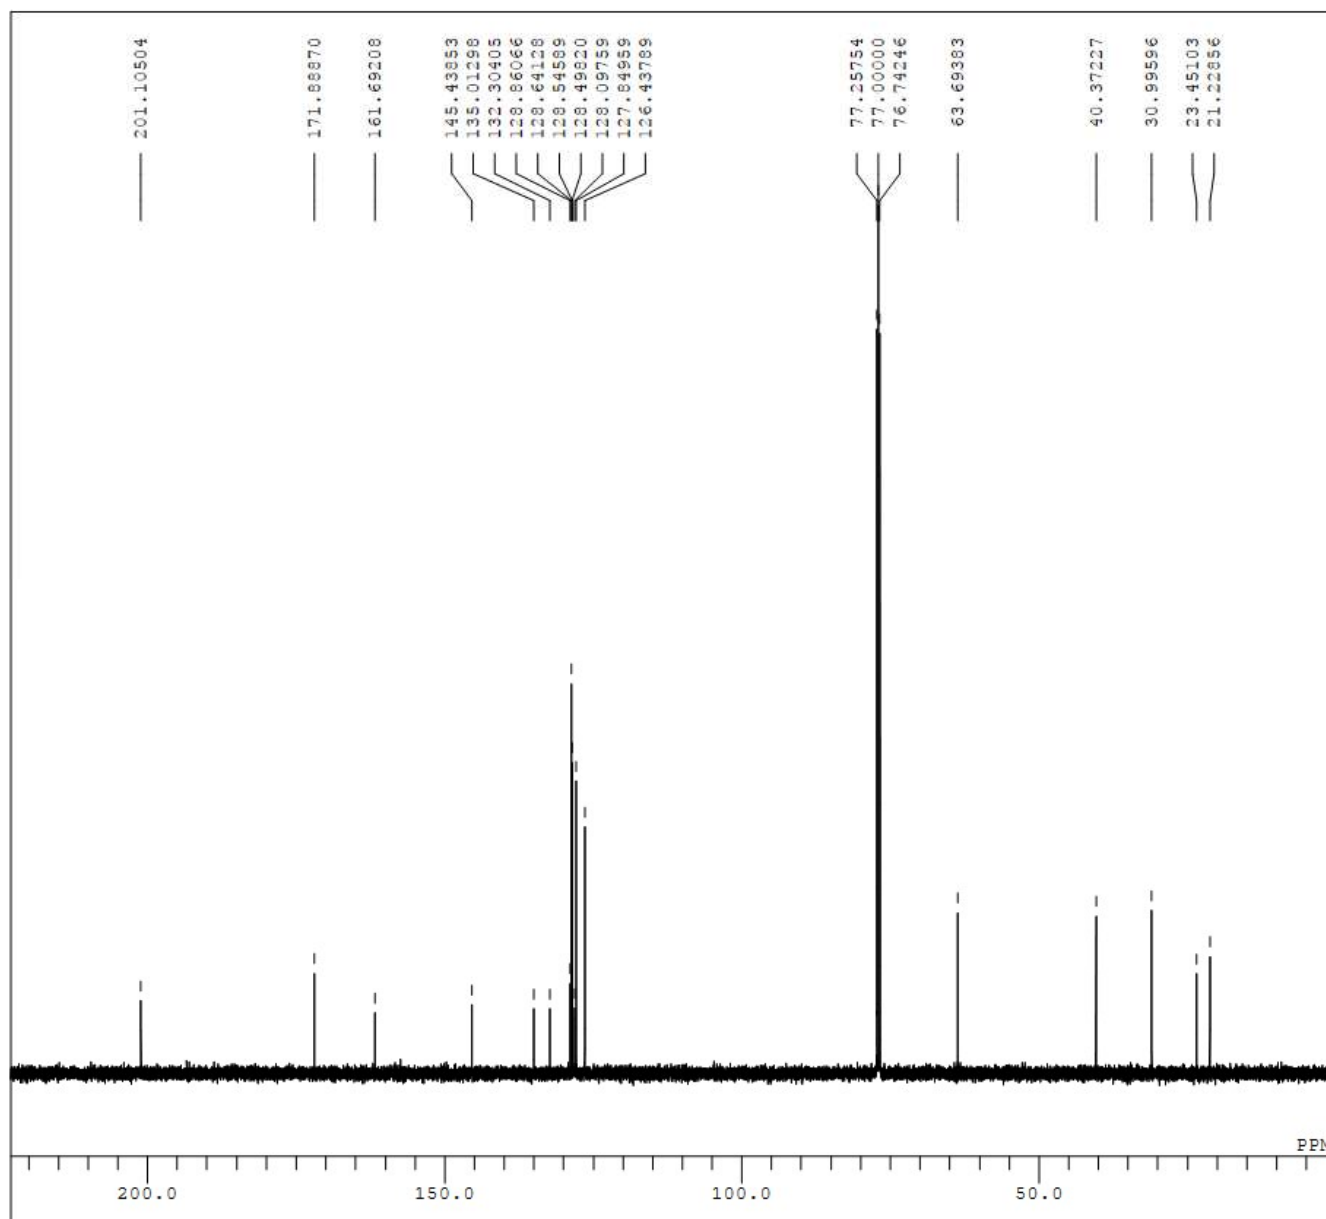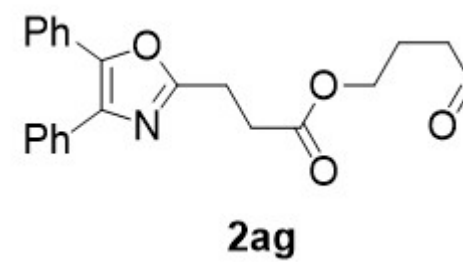

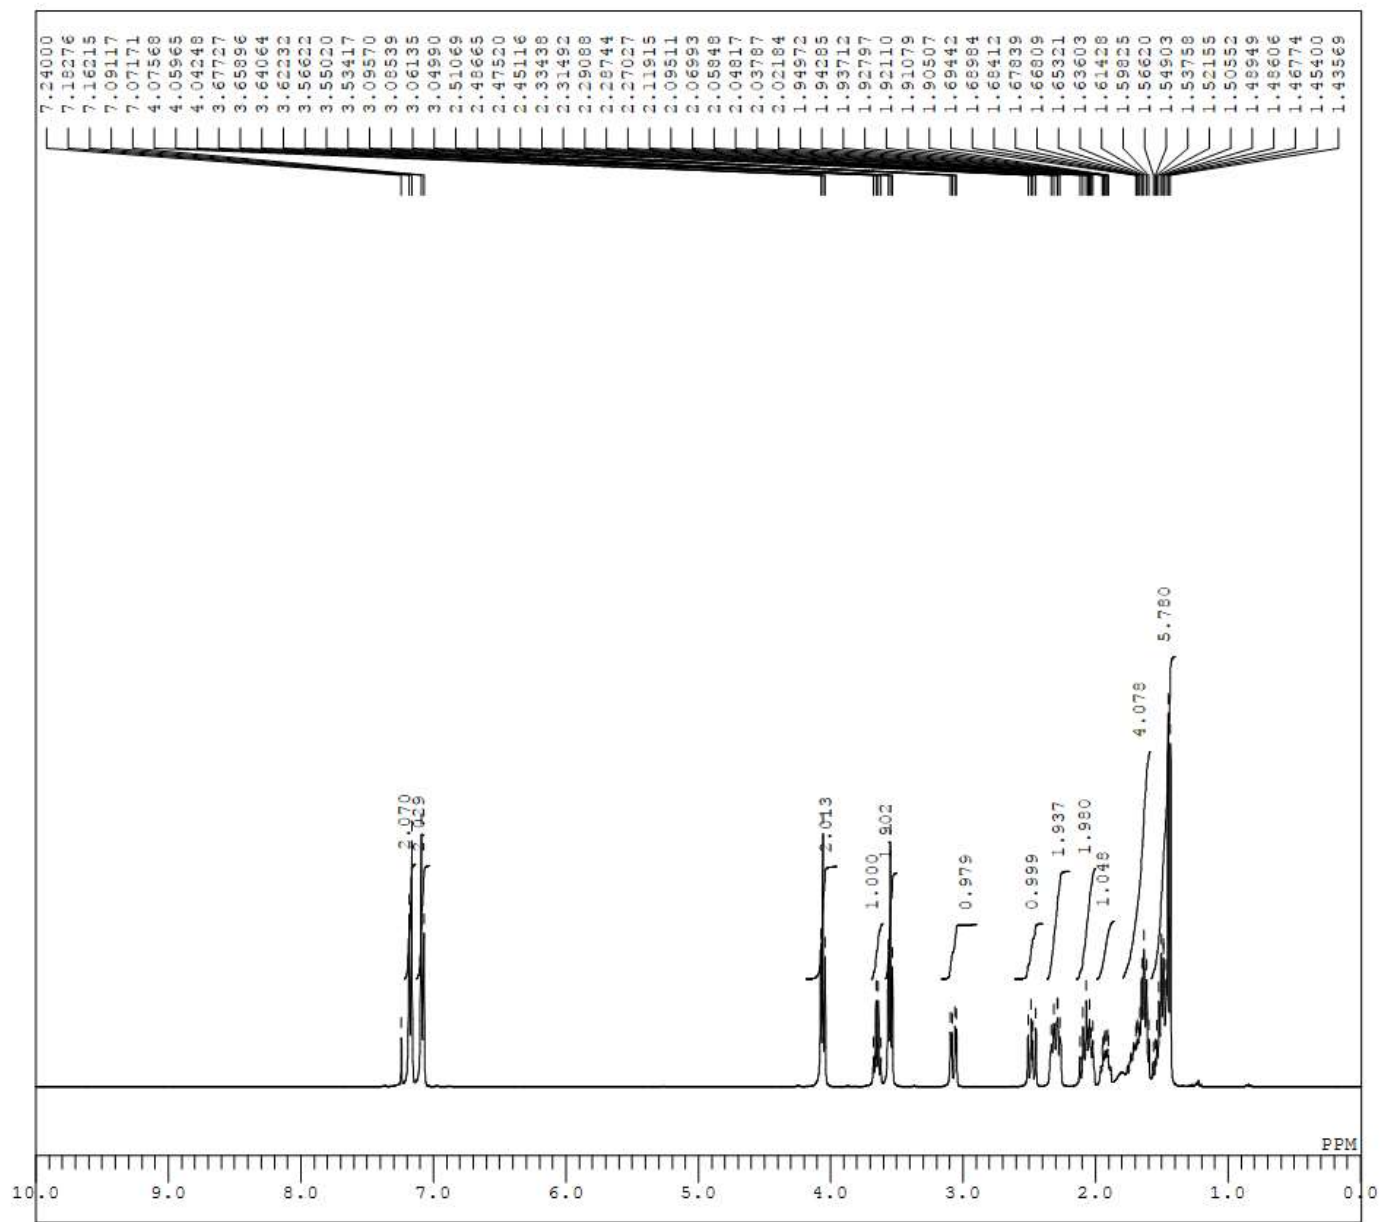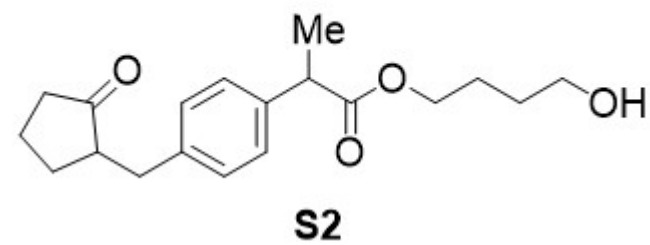

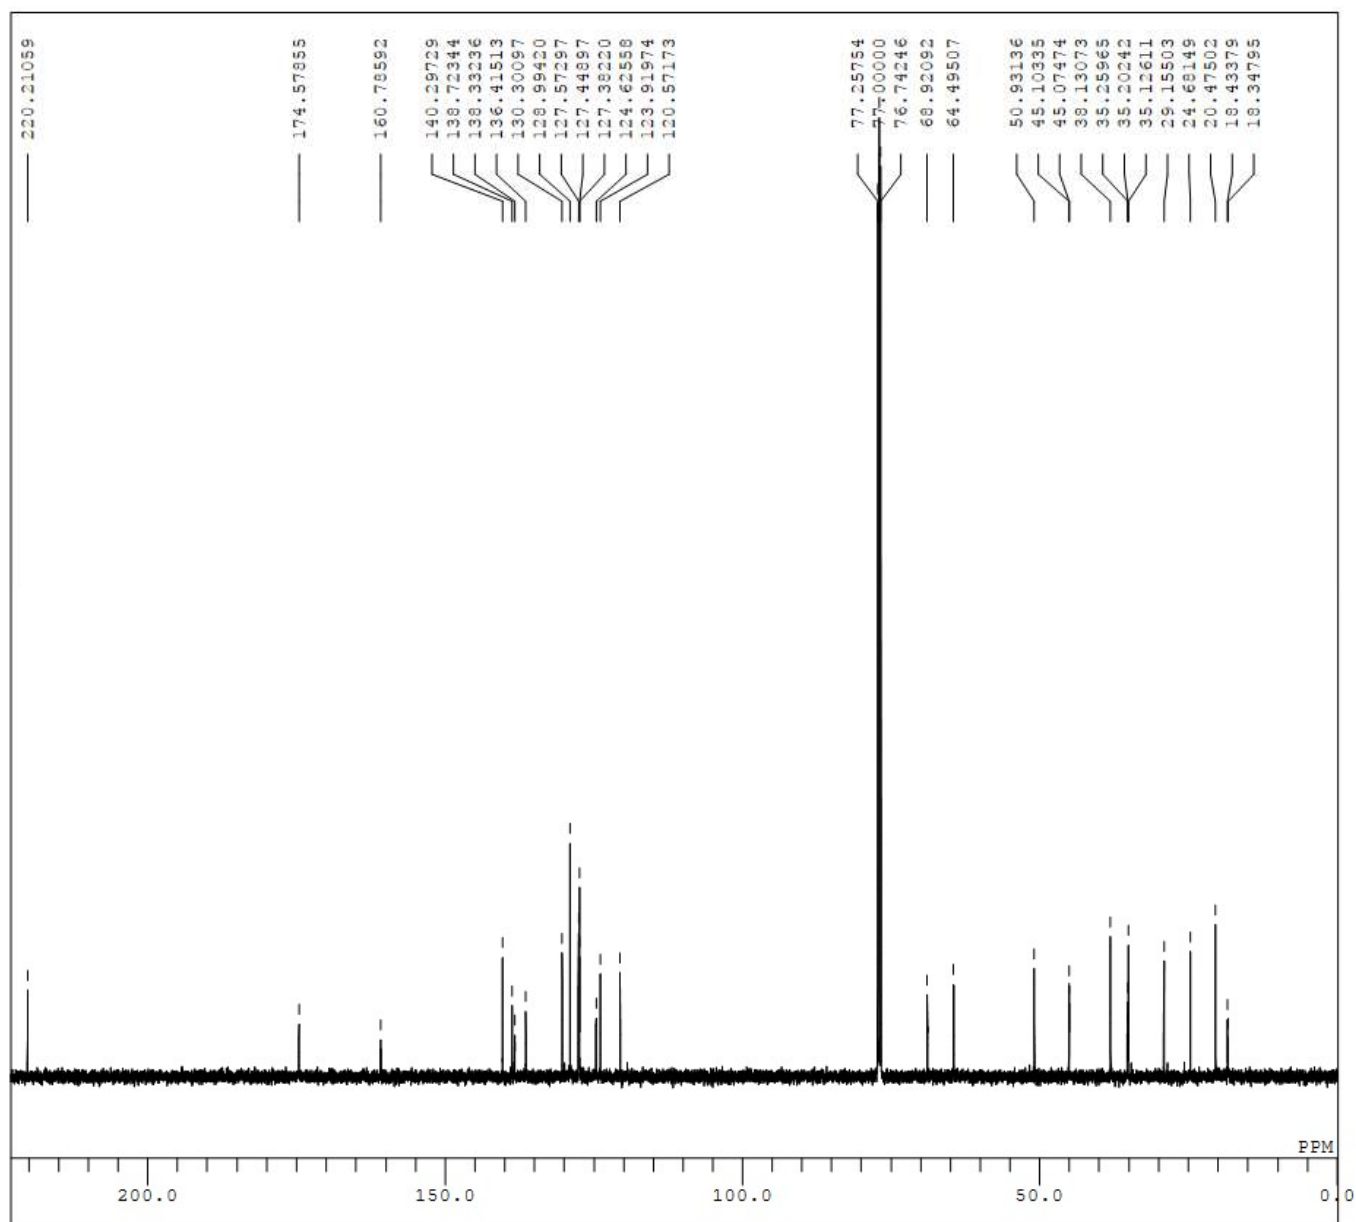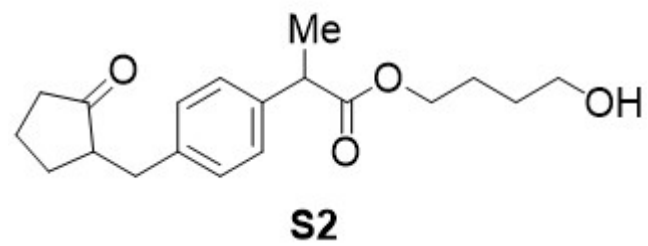

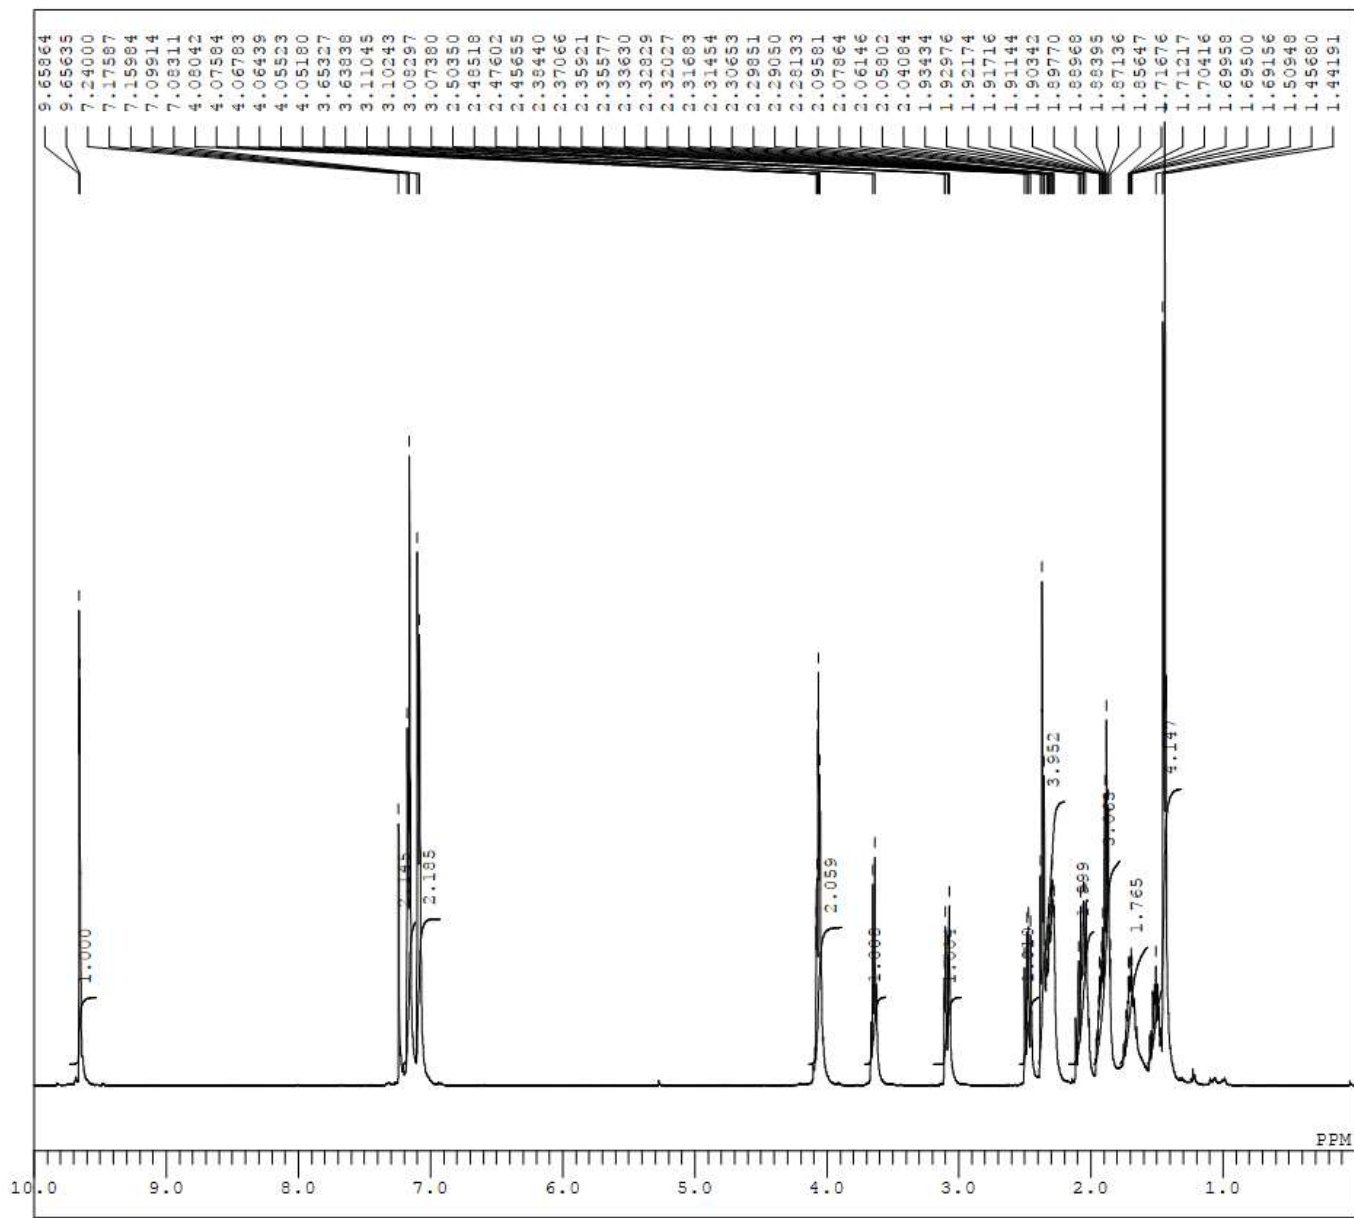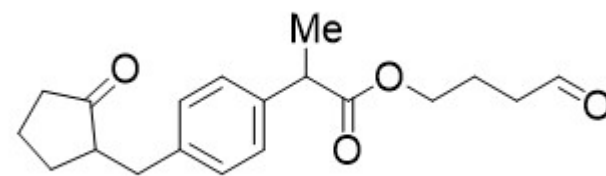

**2ah**

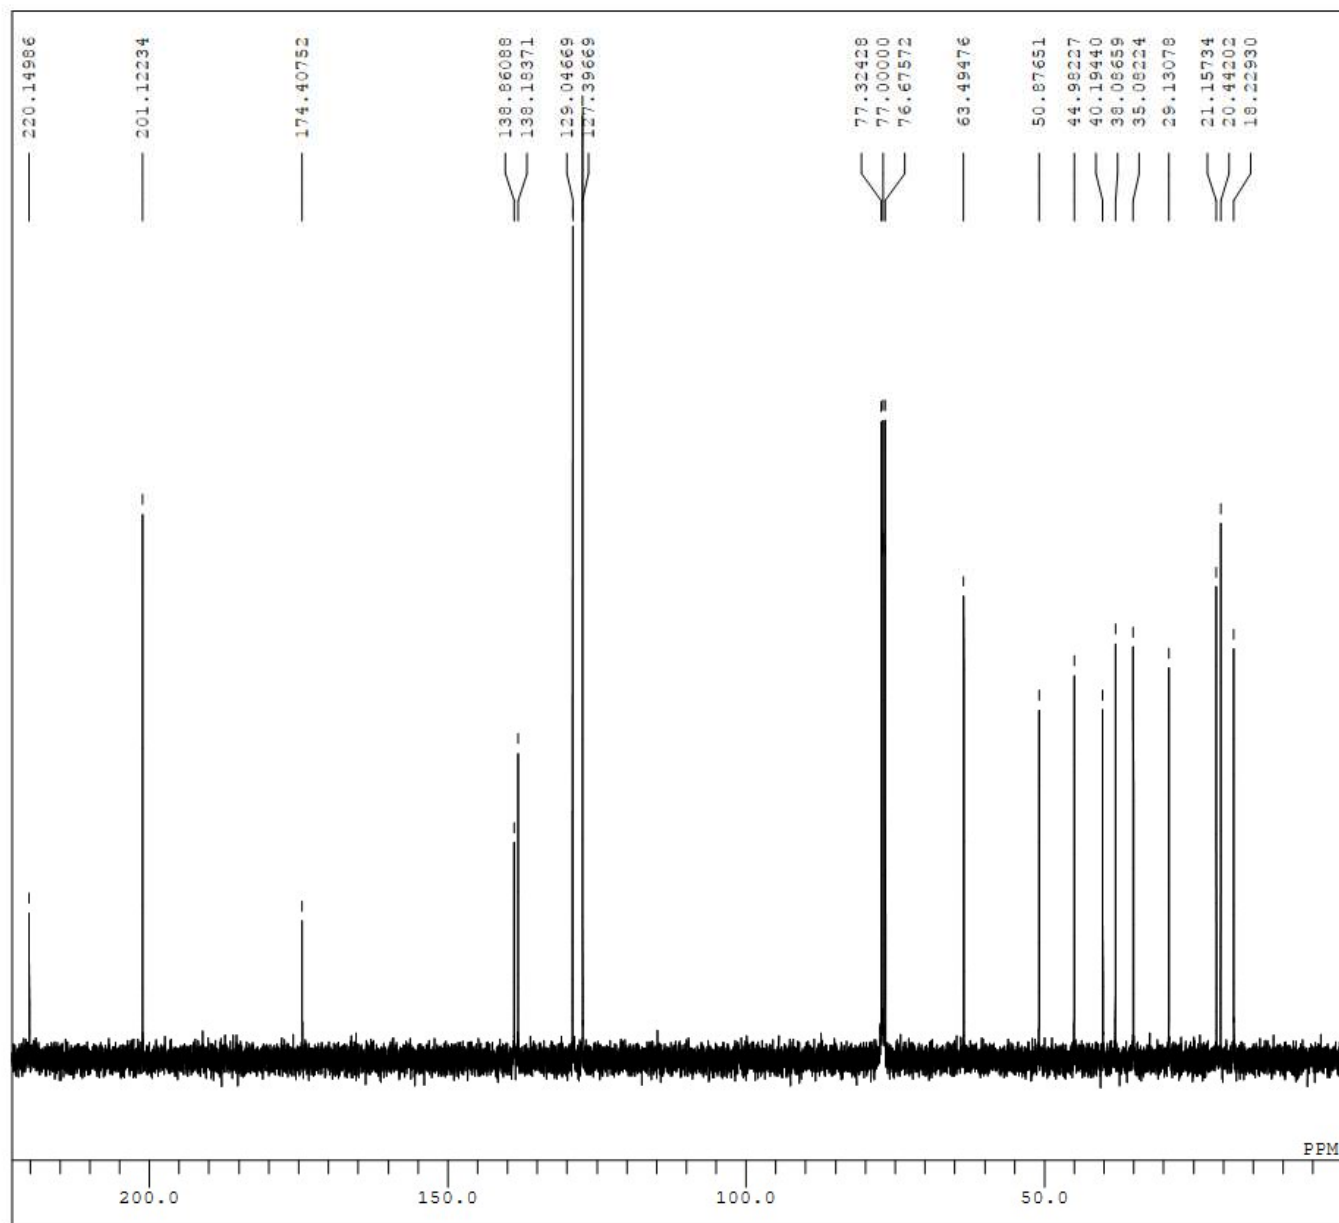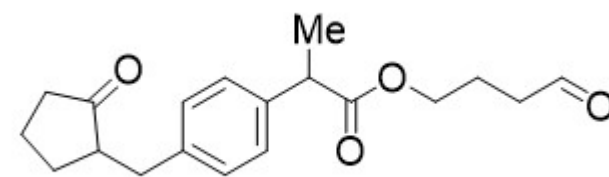

**2ah**

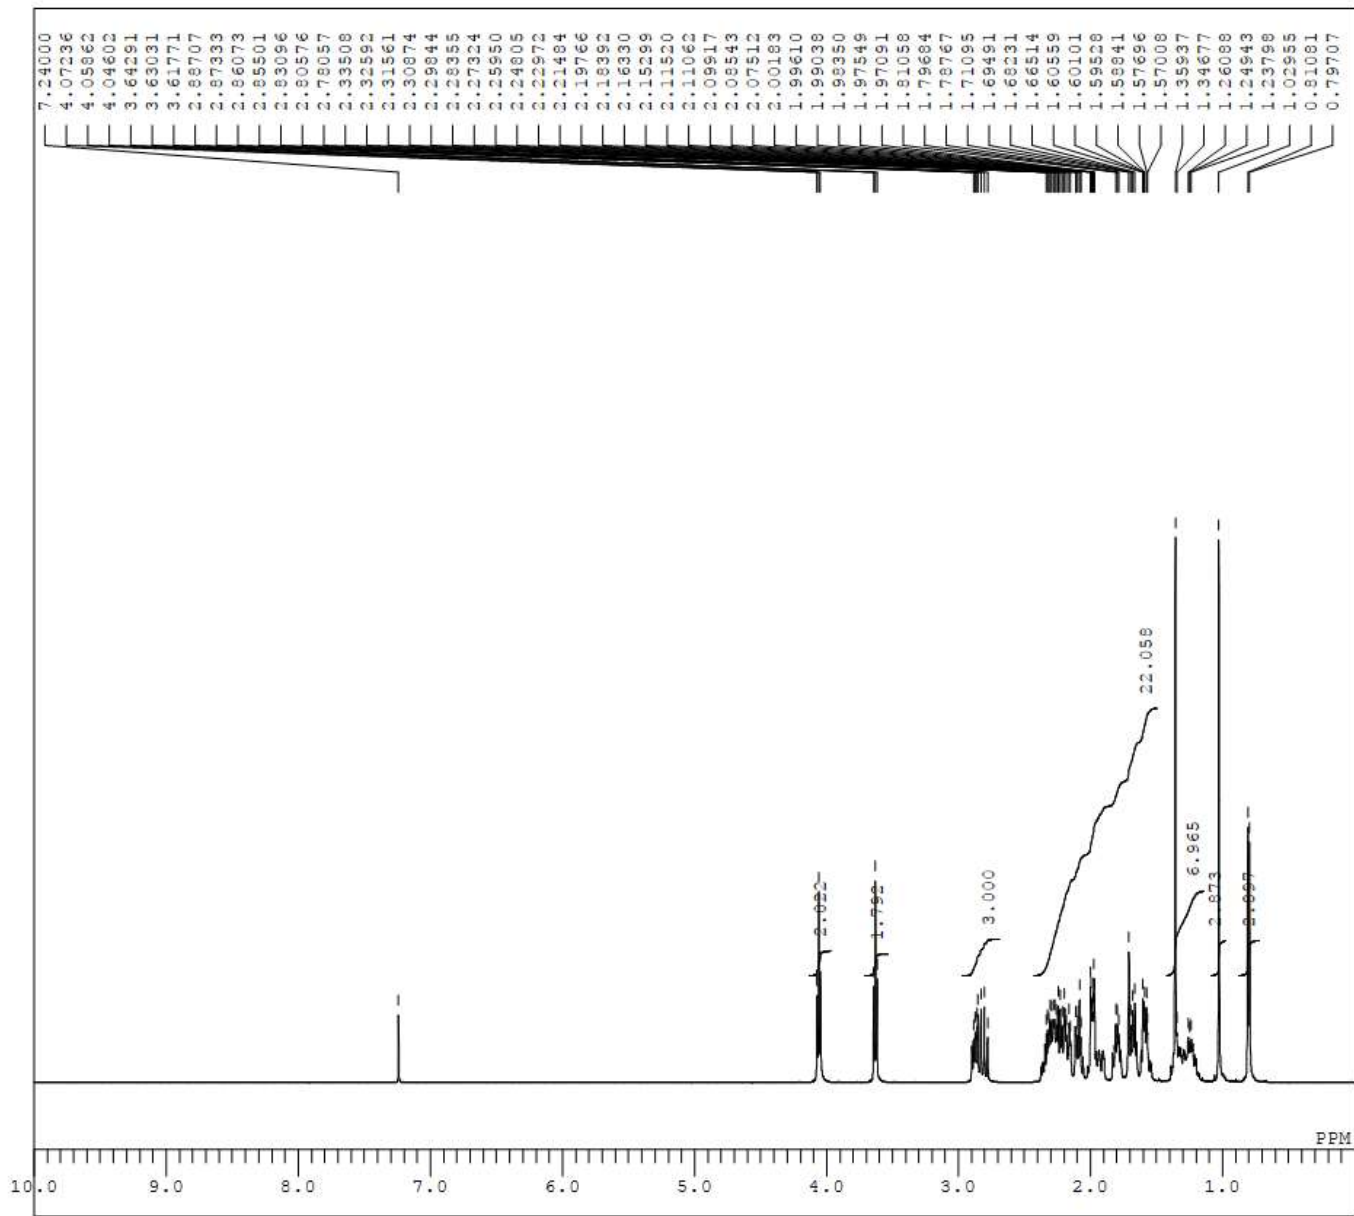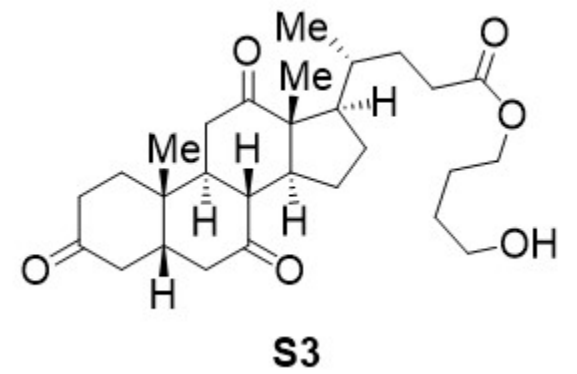



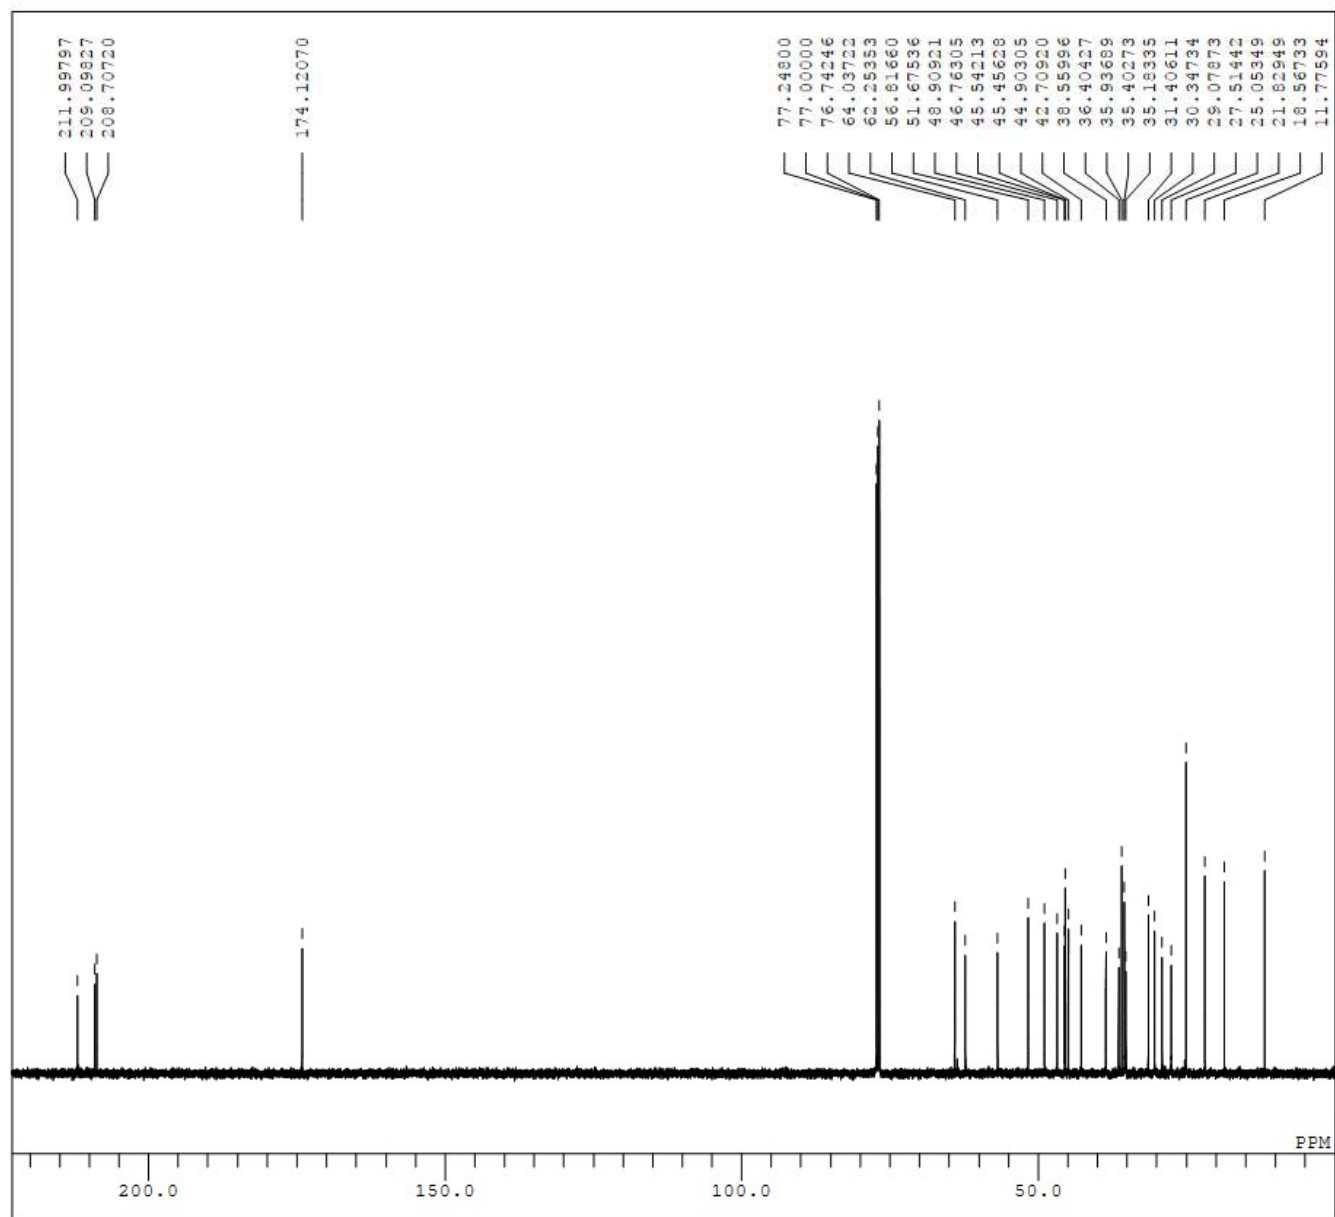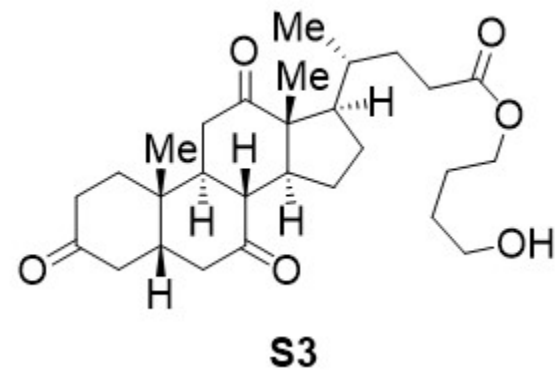

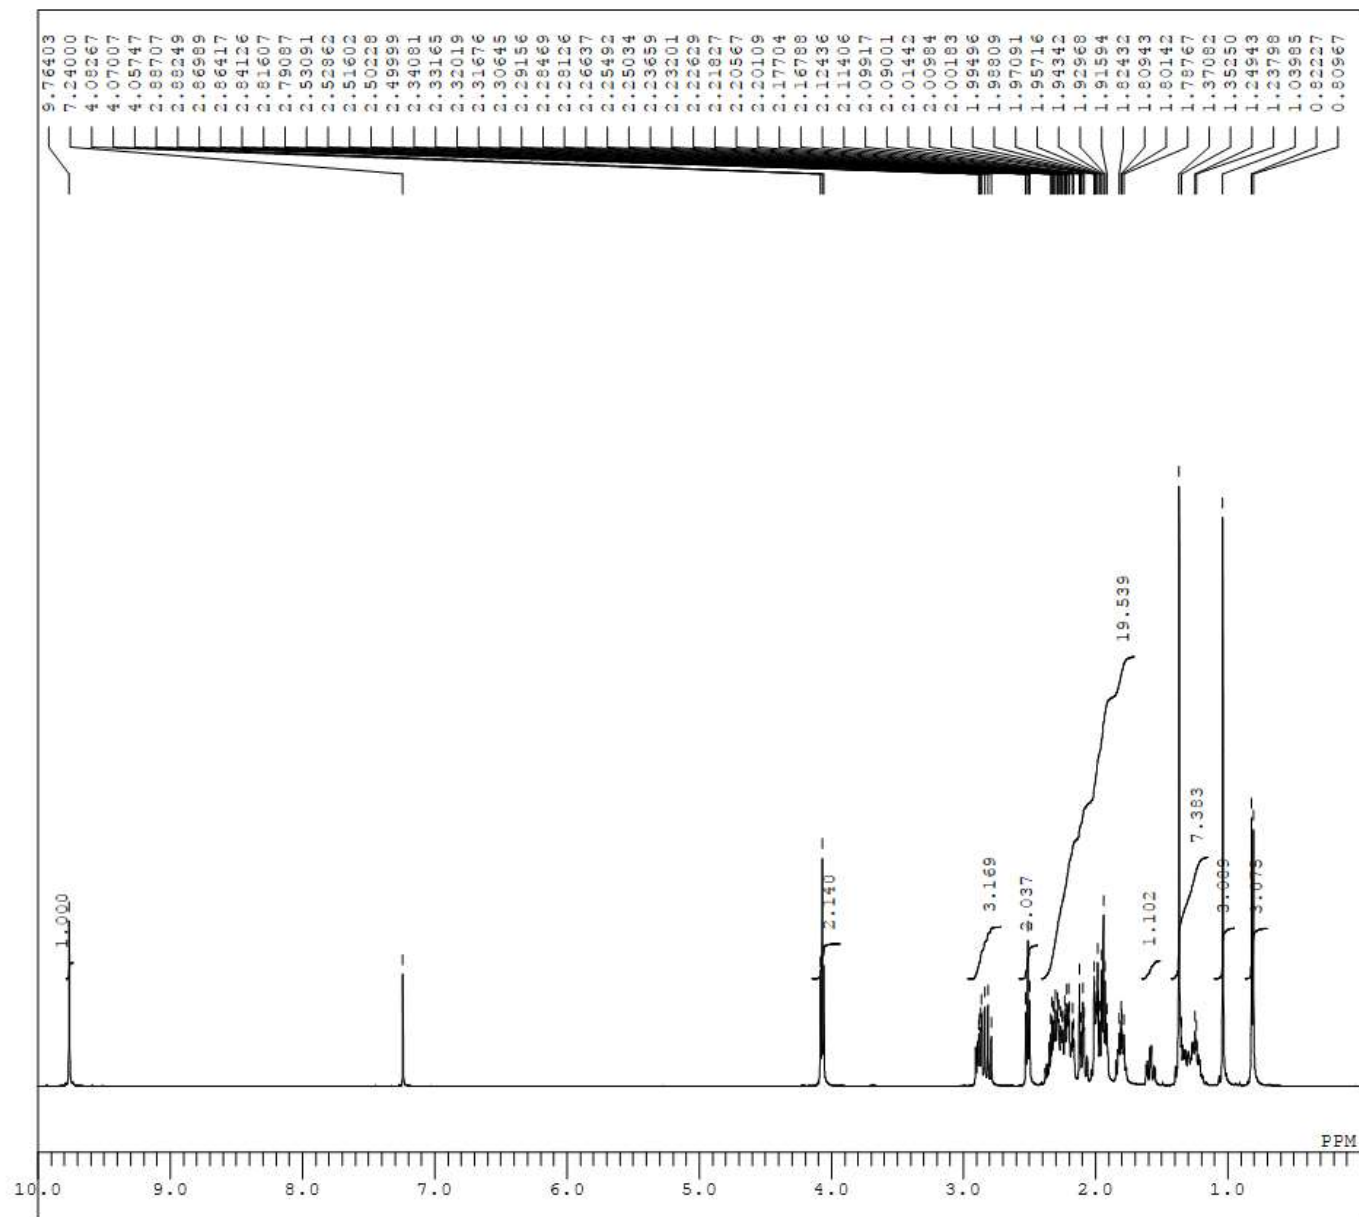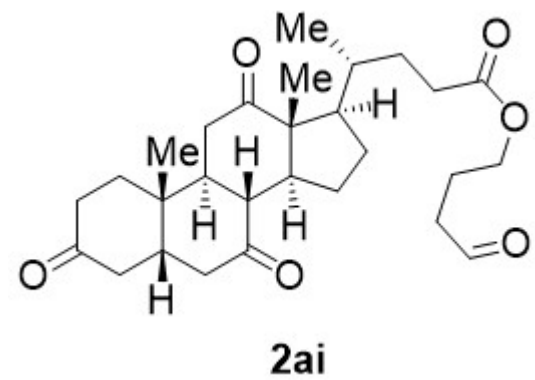

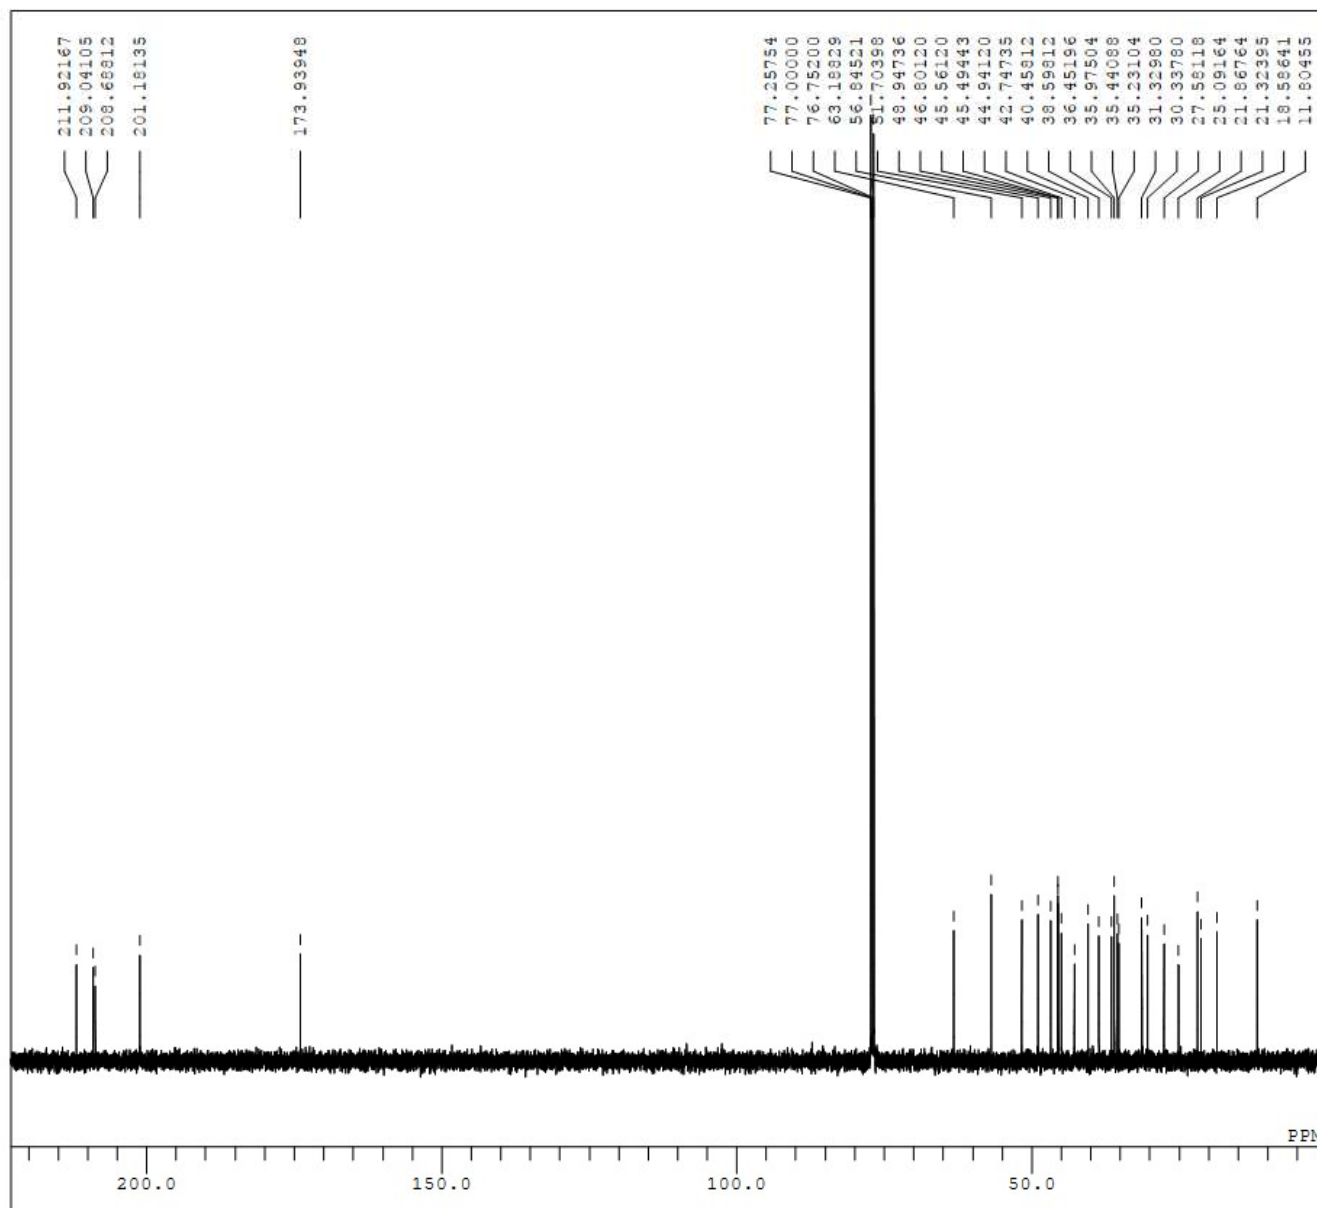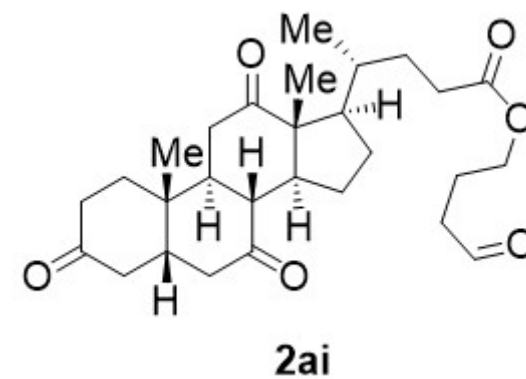

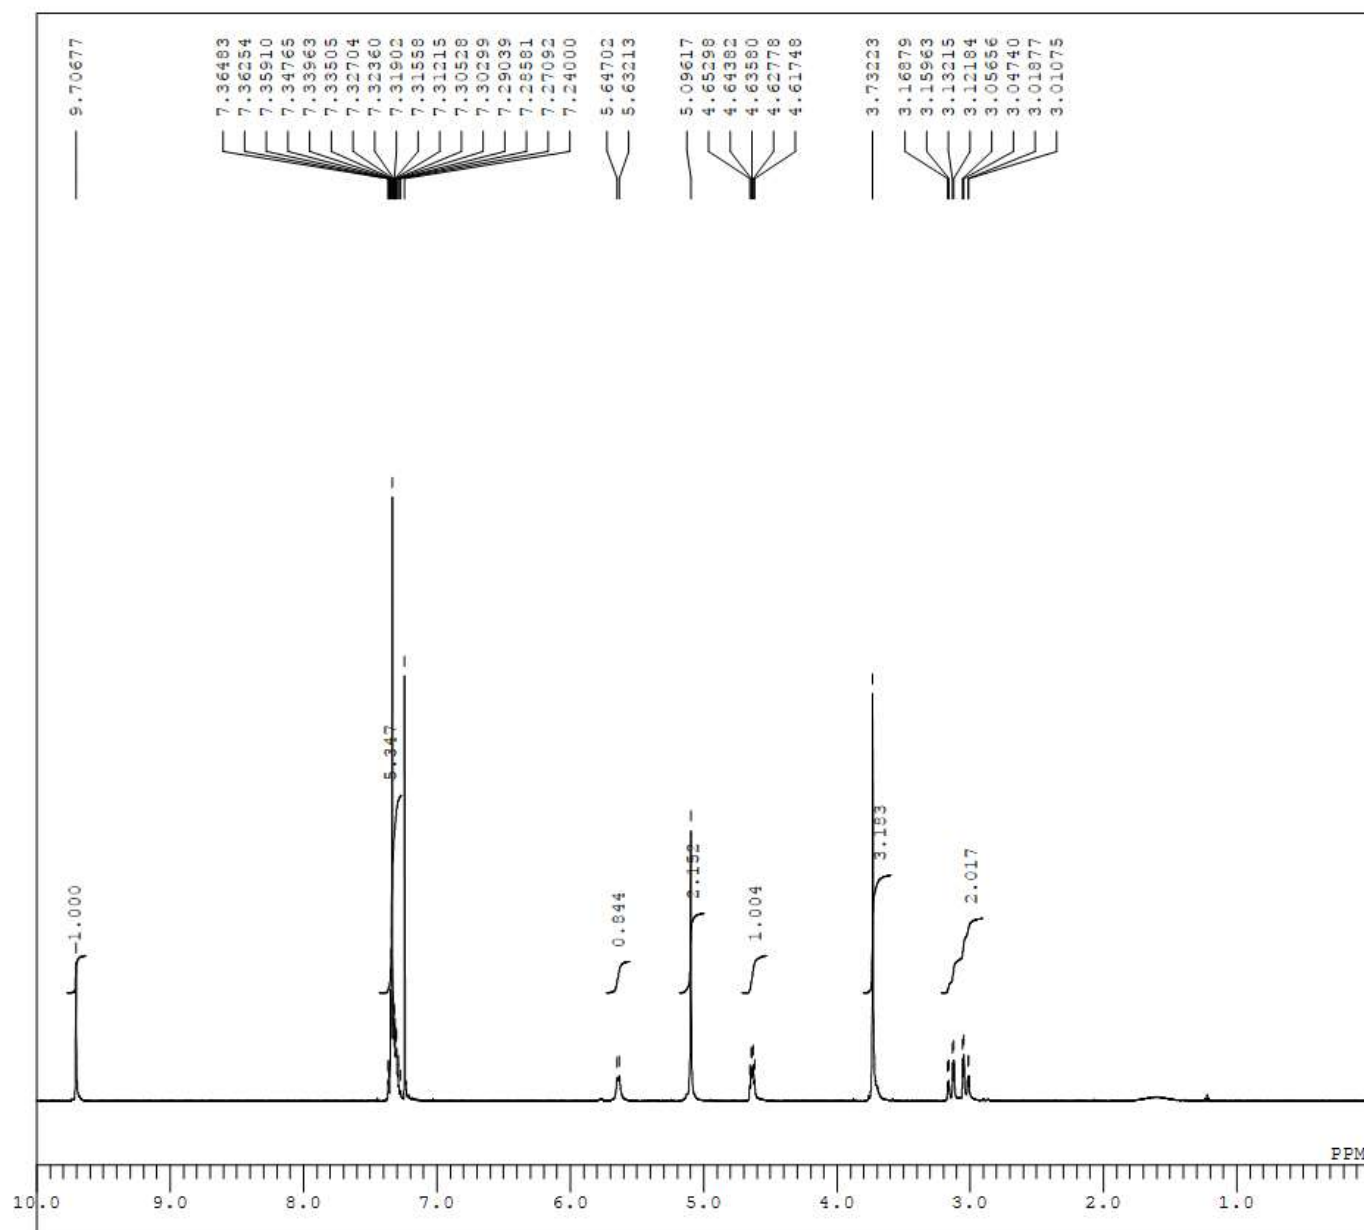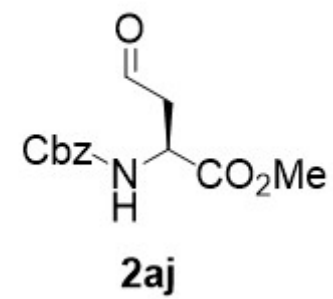

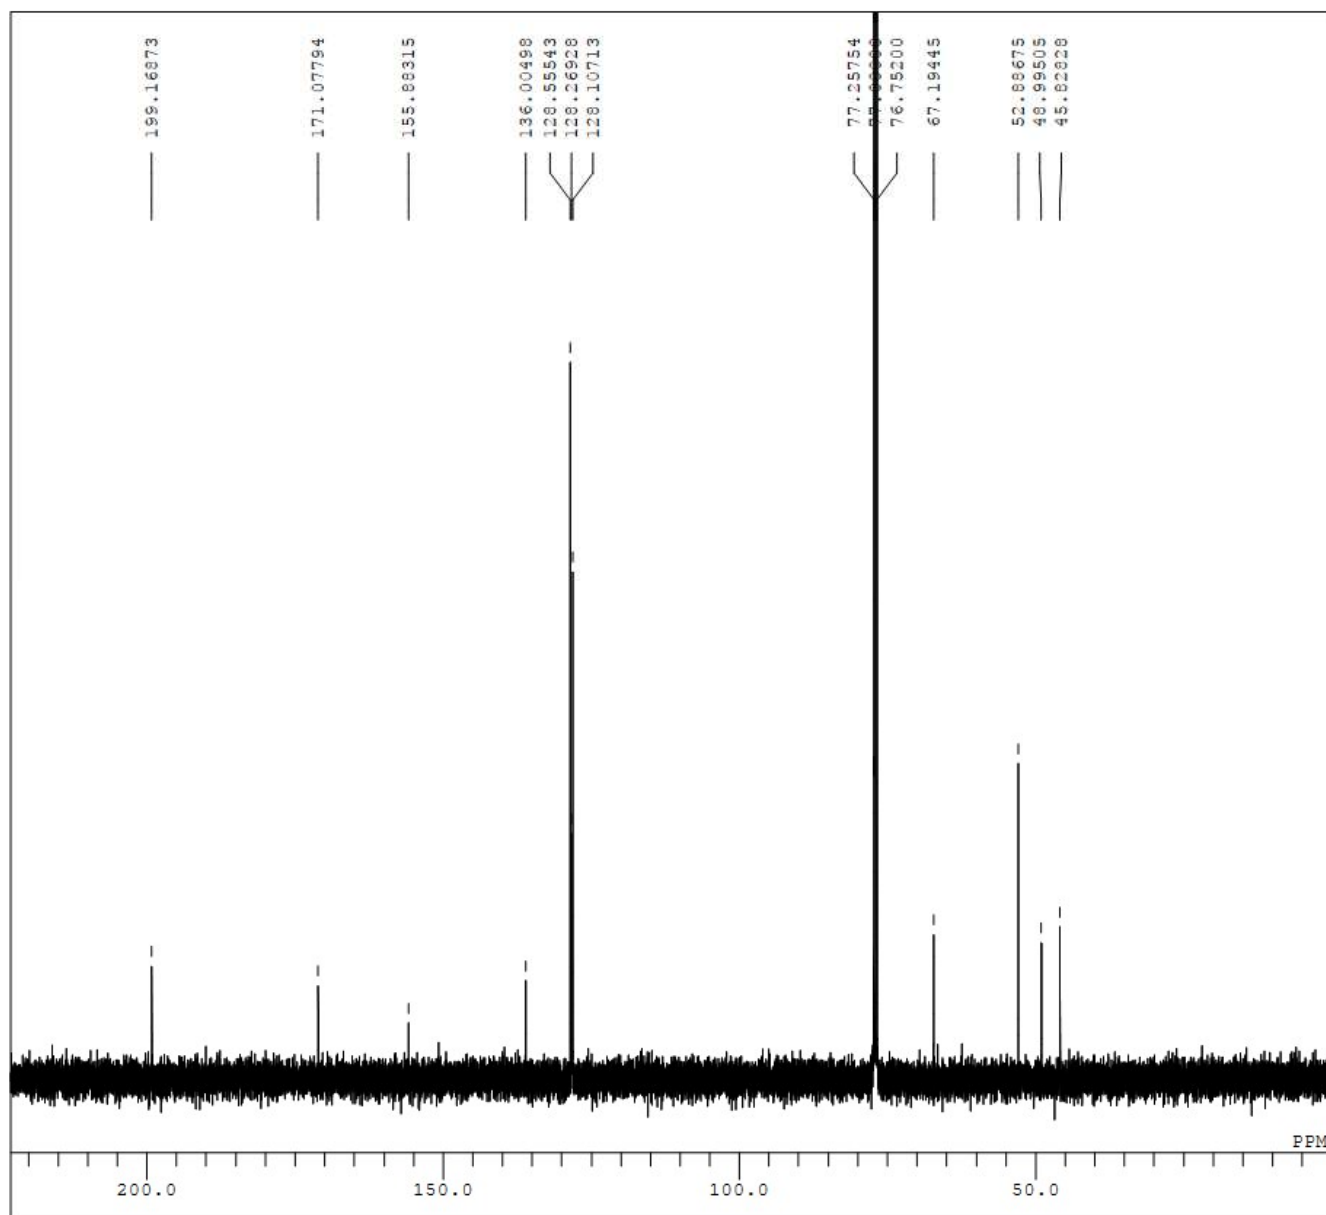

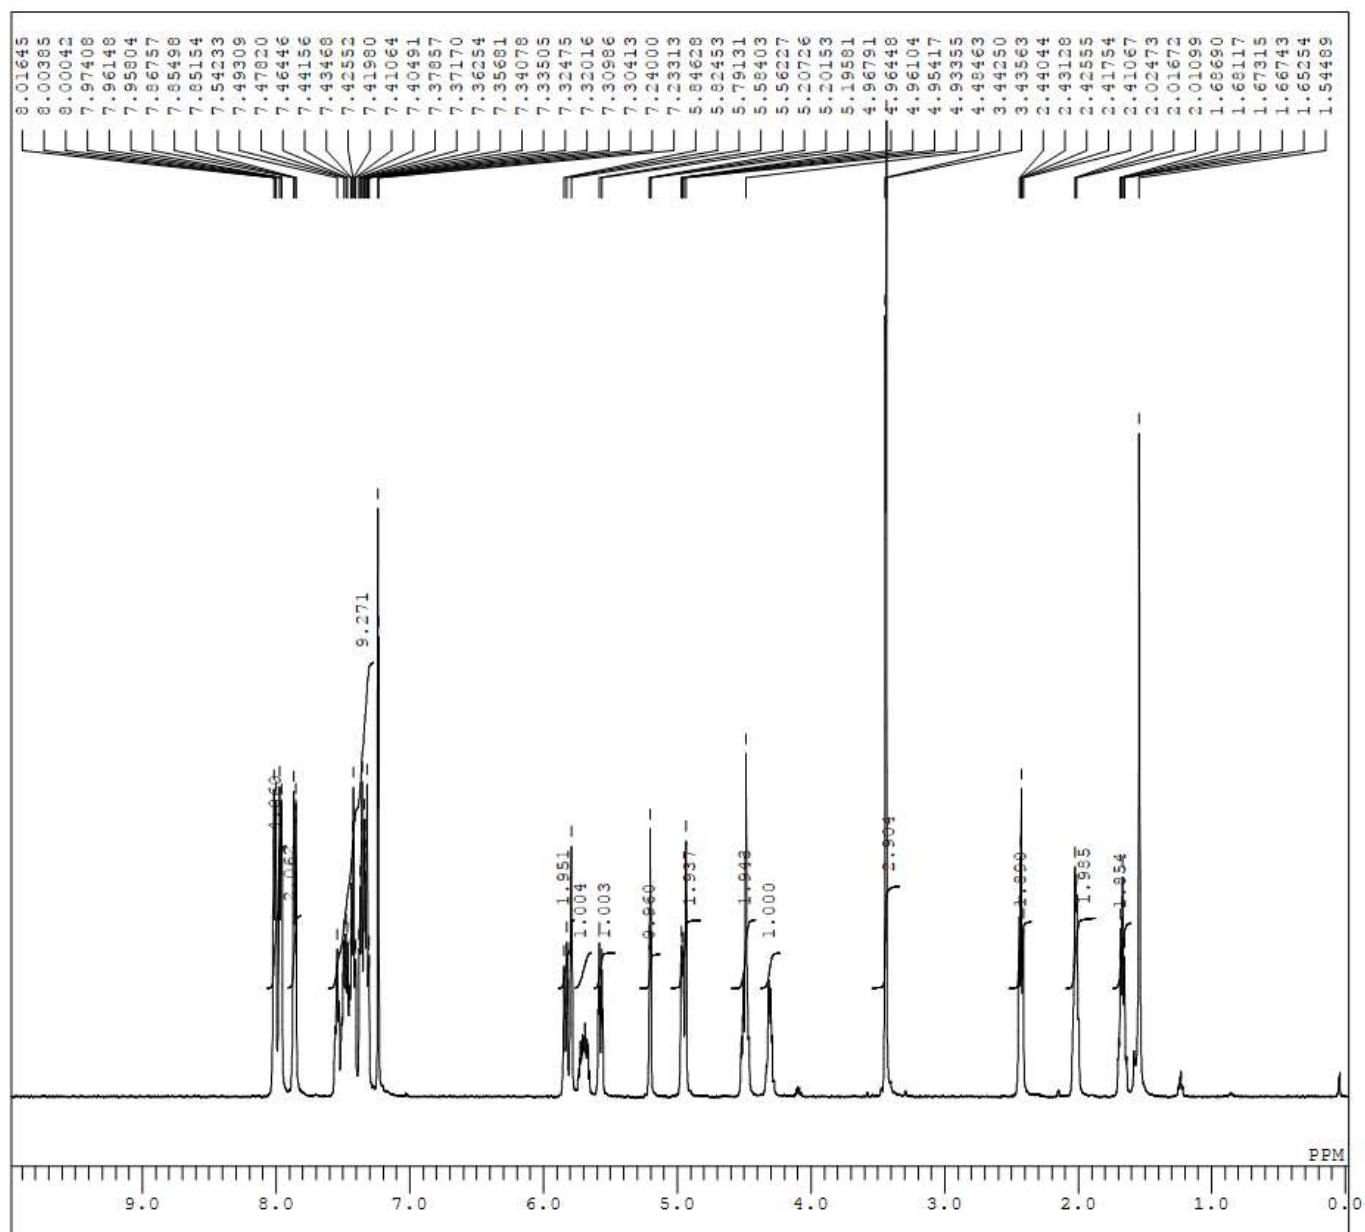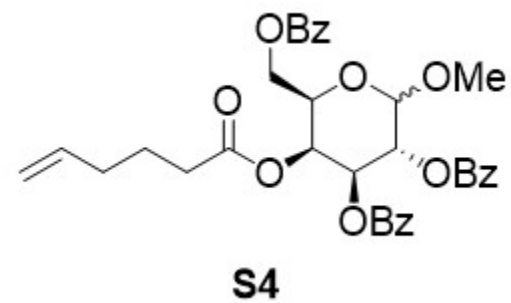

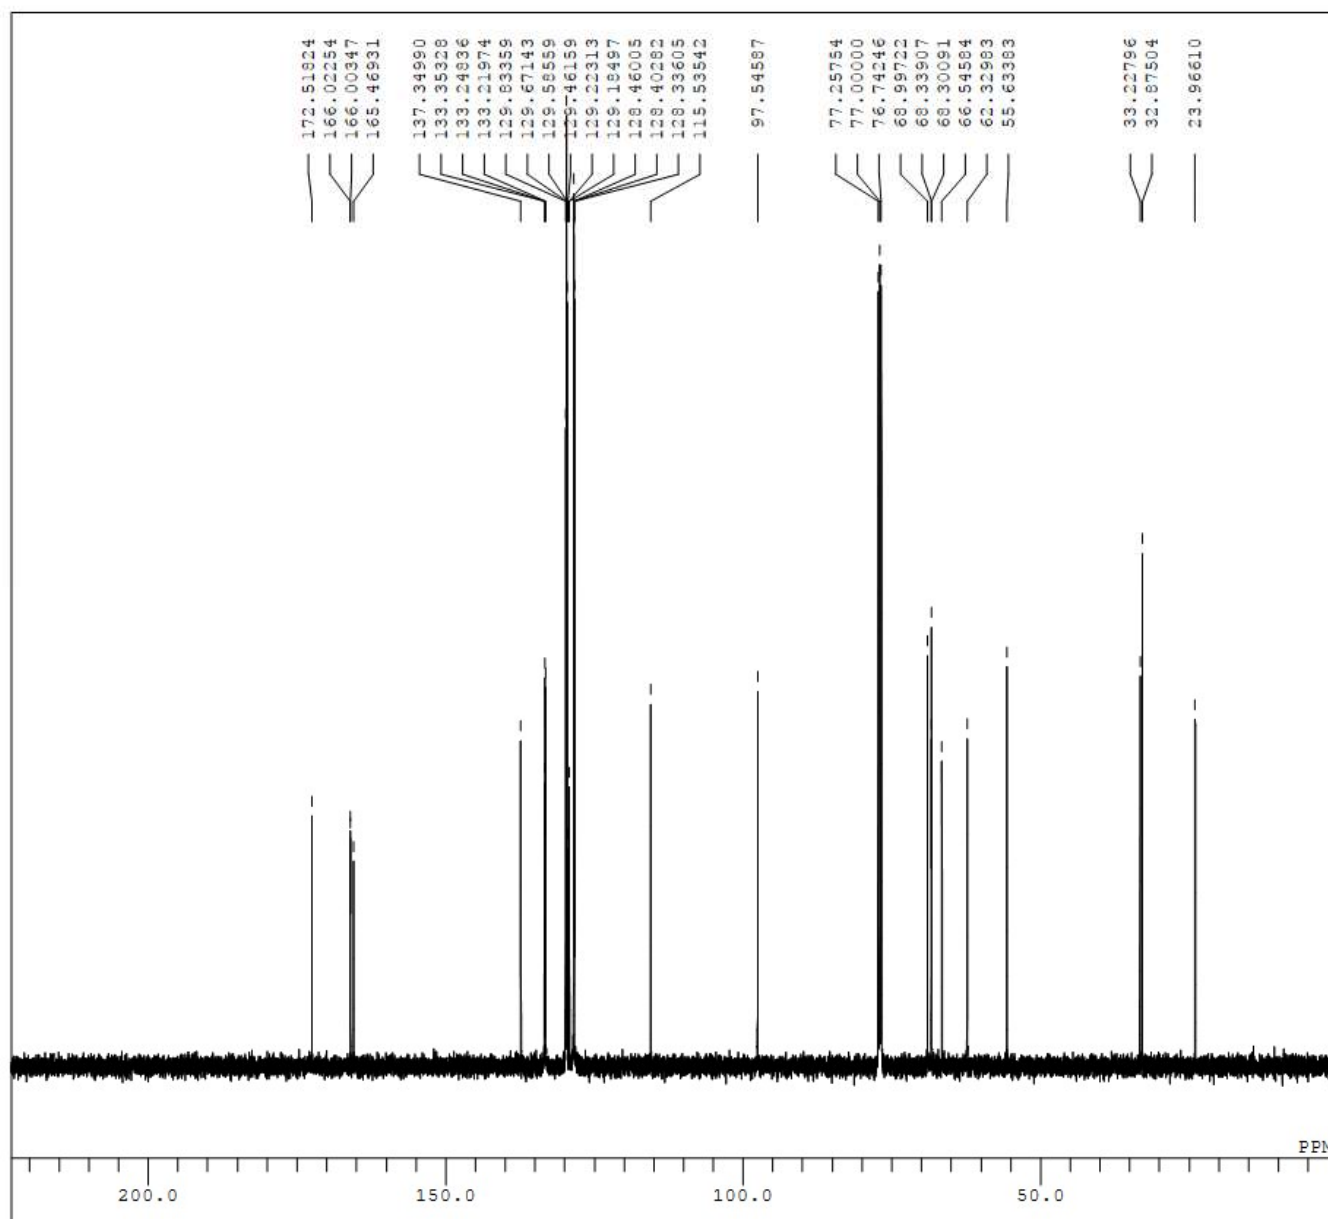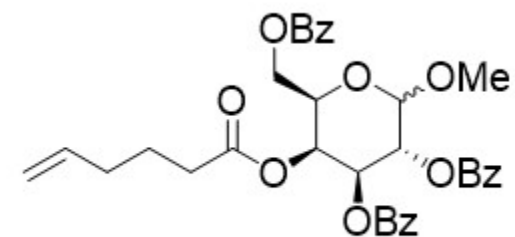

**S4**

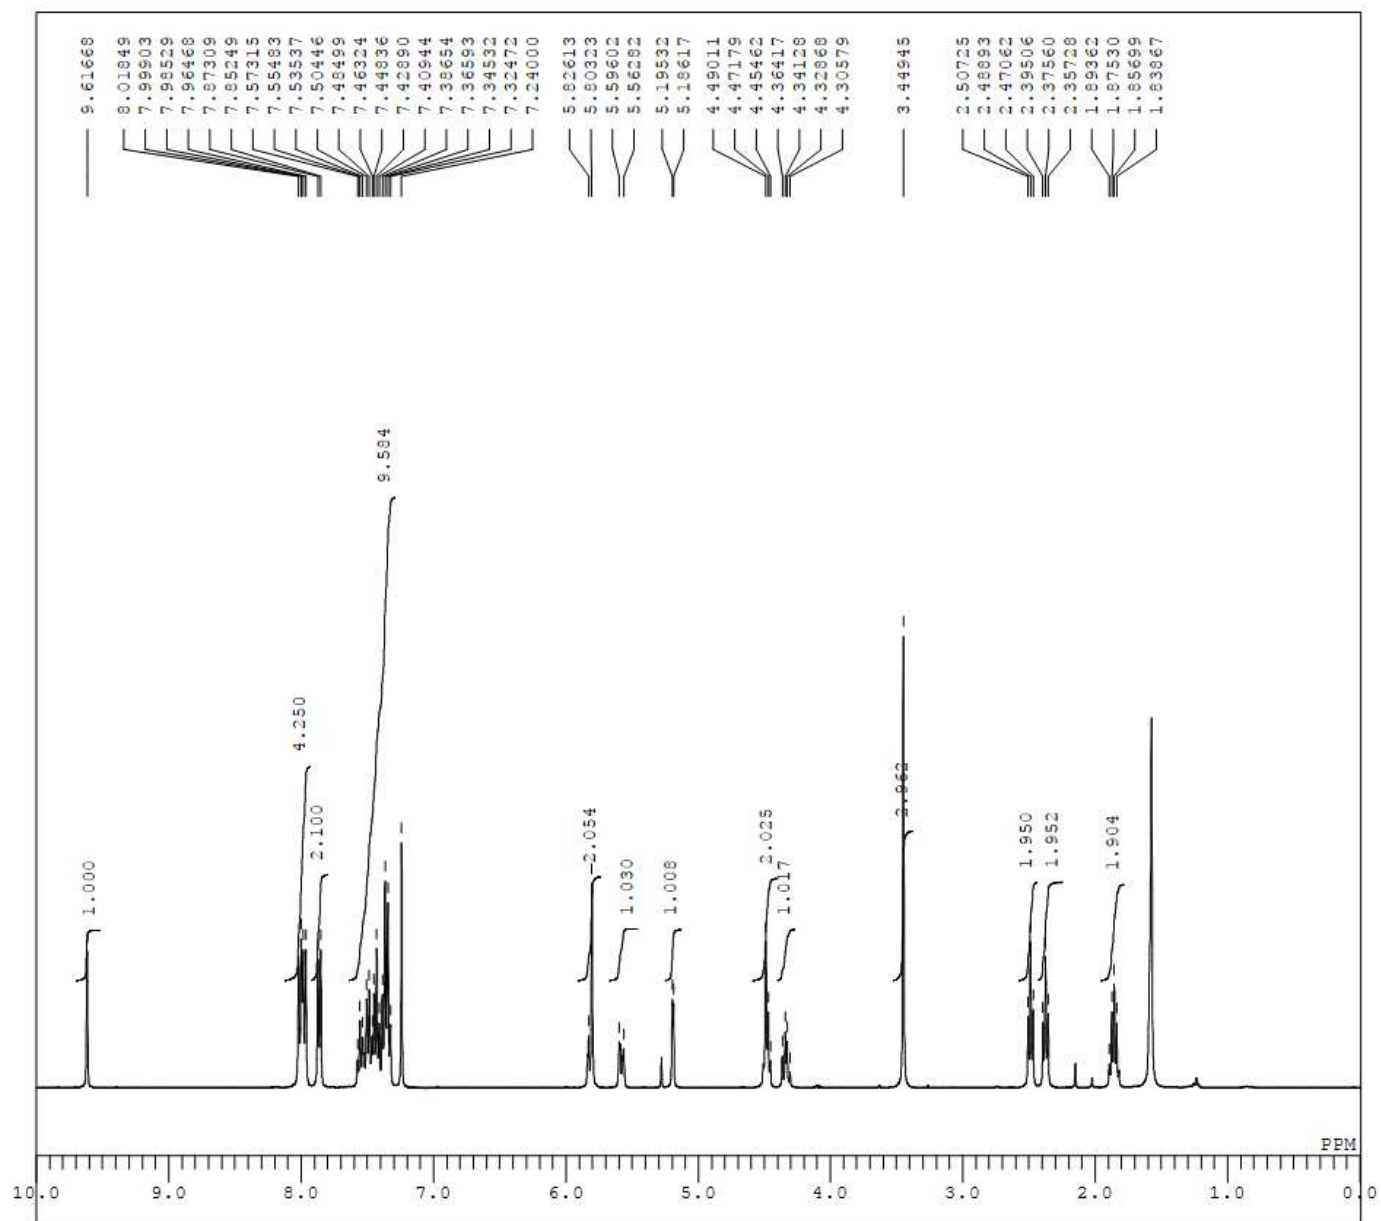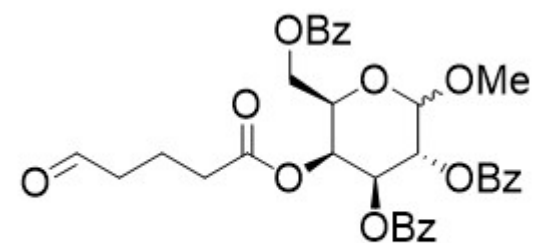

**2ak**



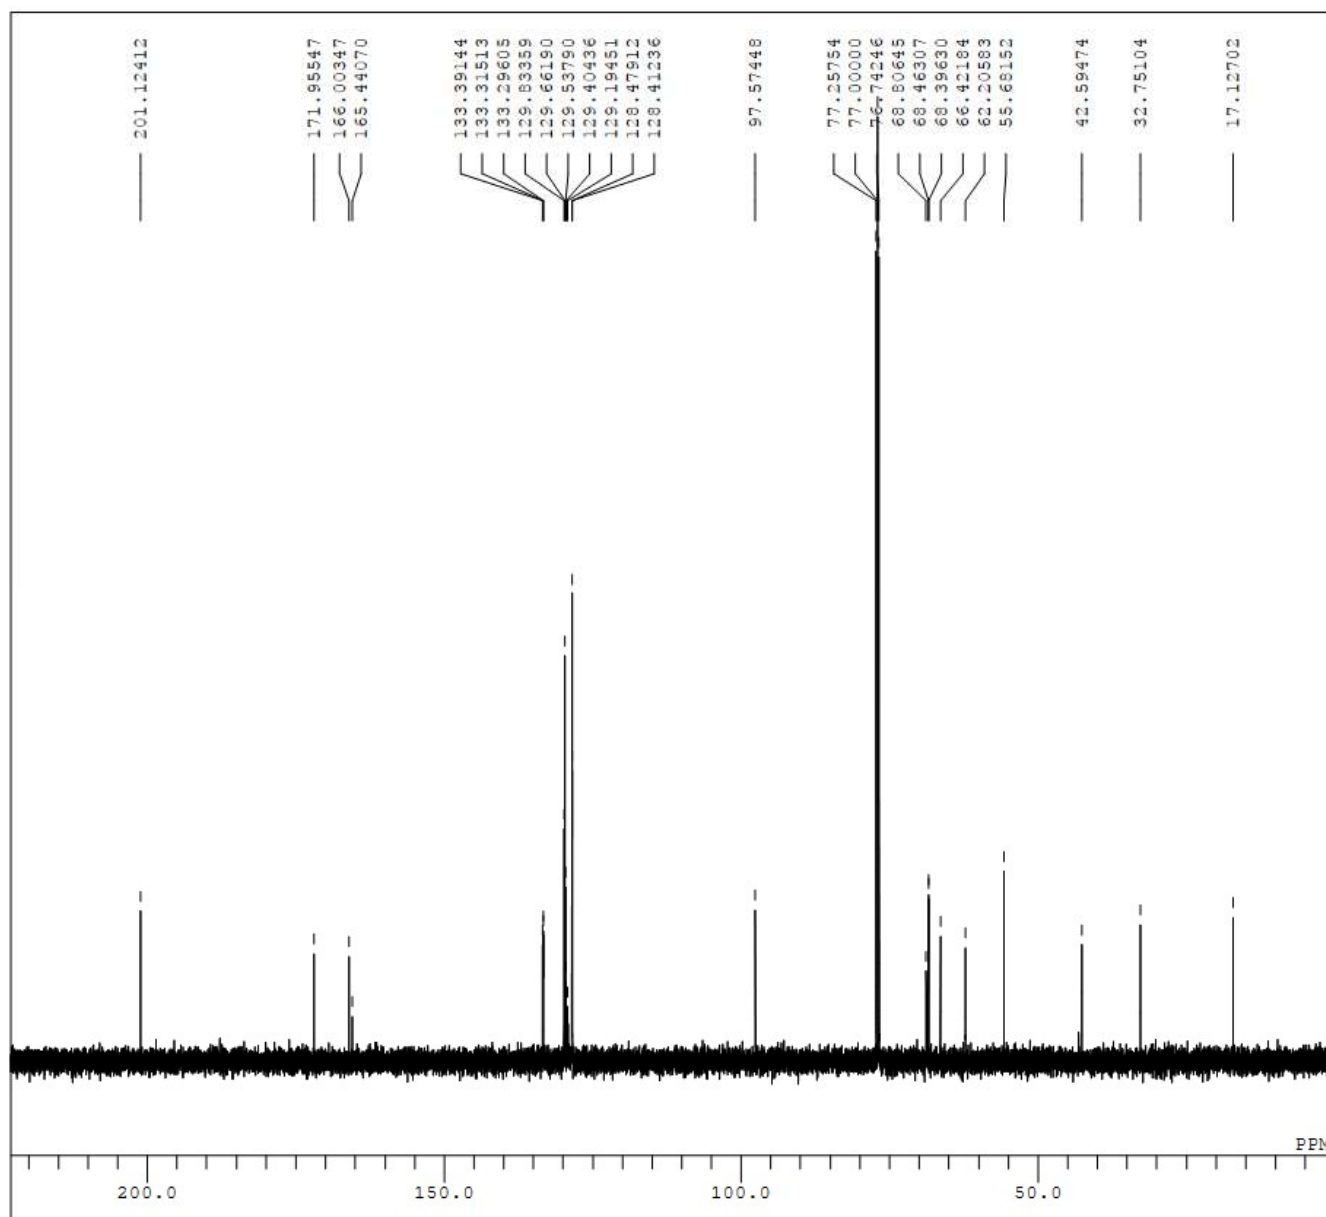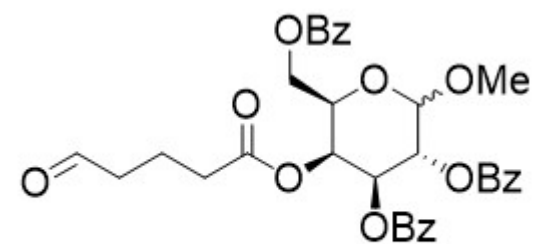

**2ak**

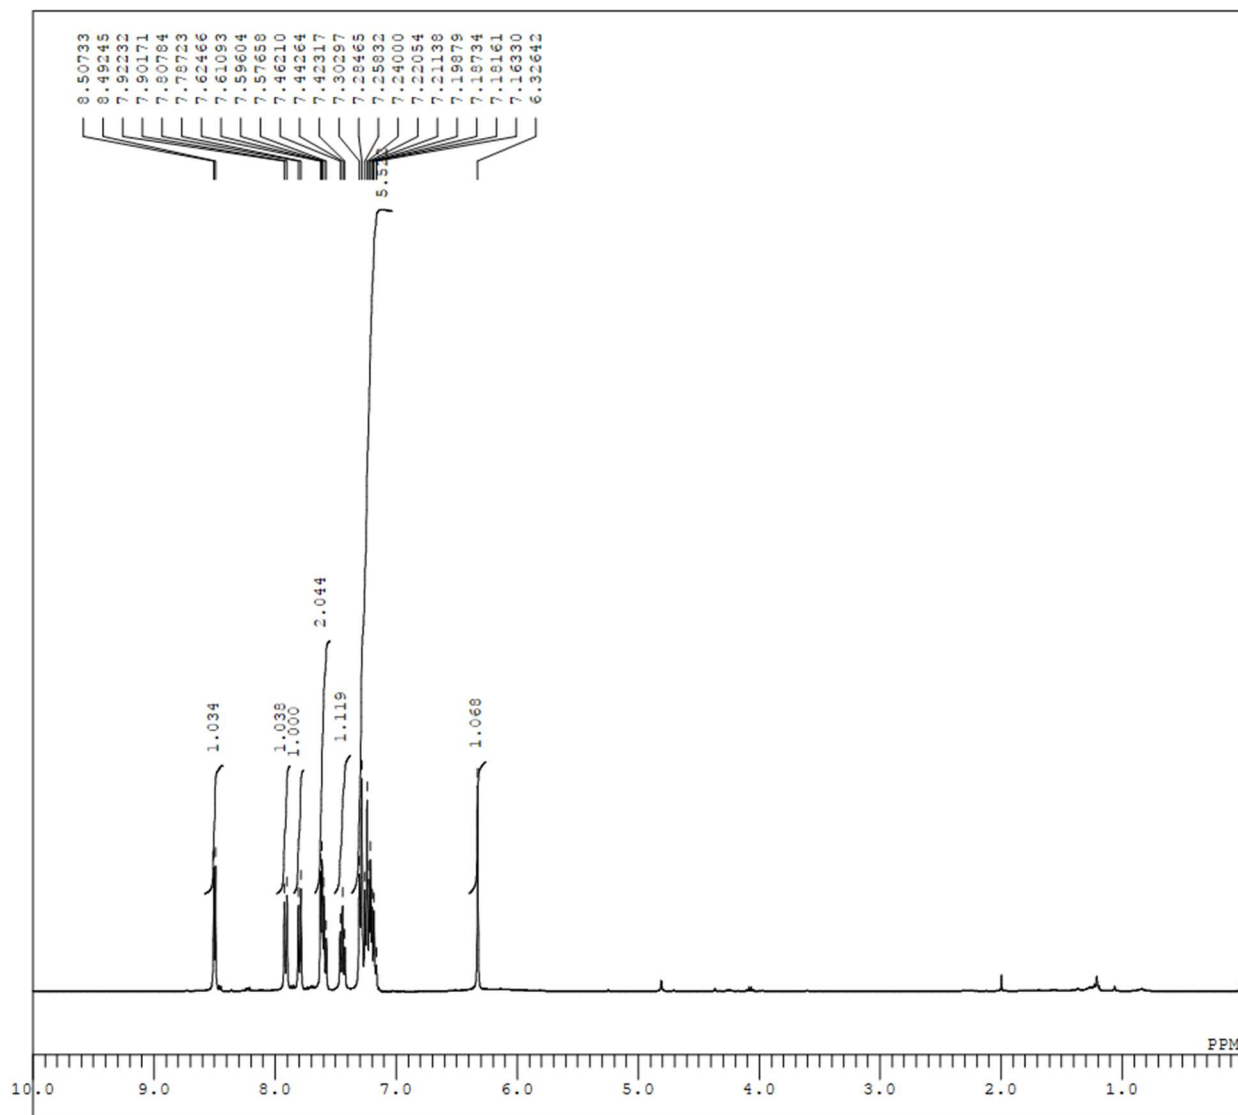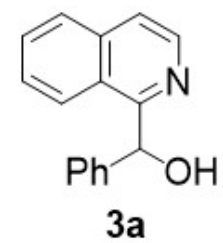

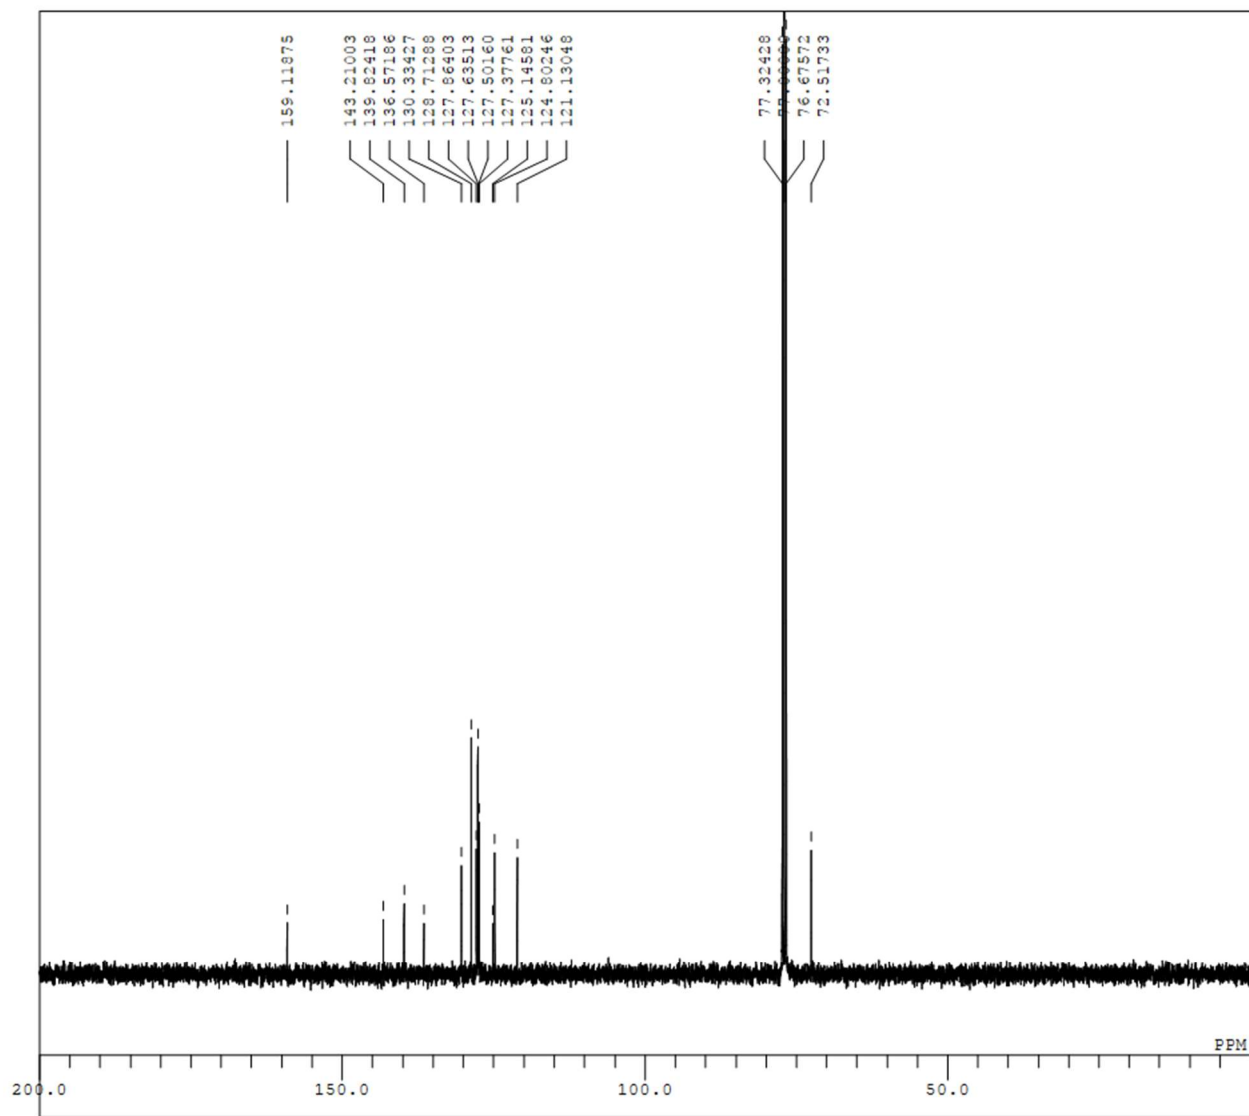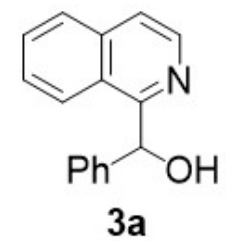

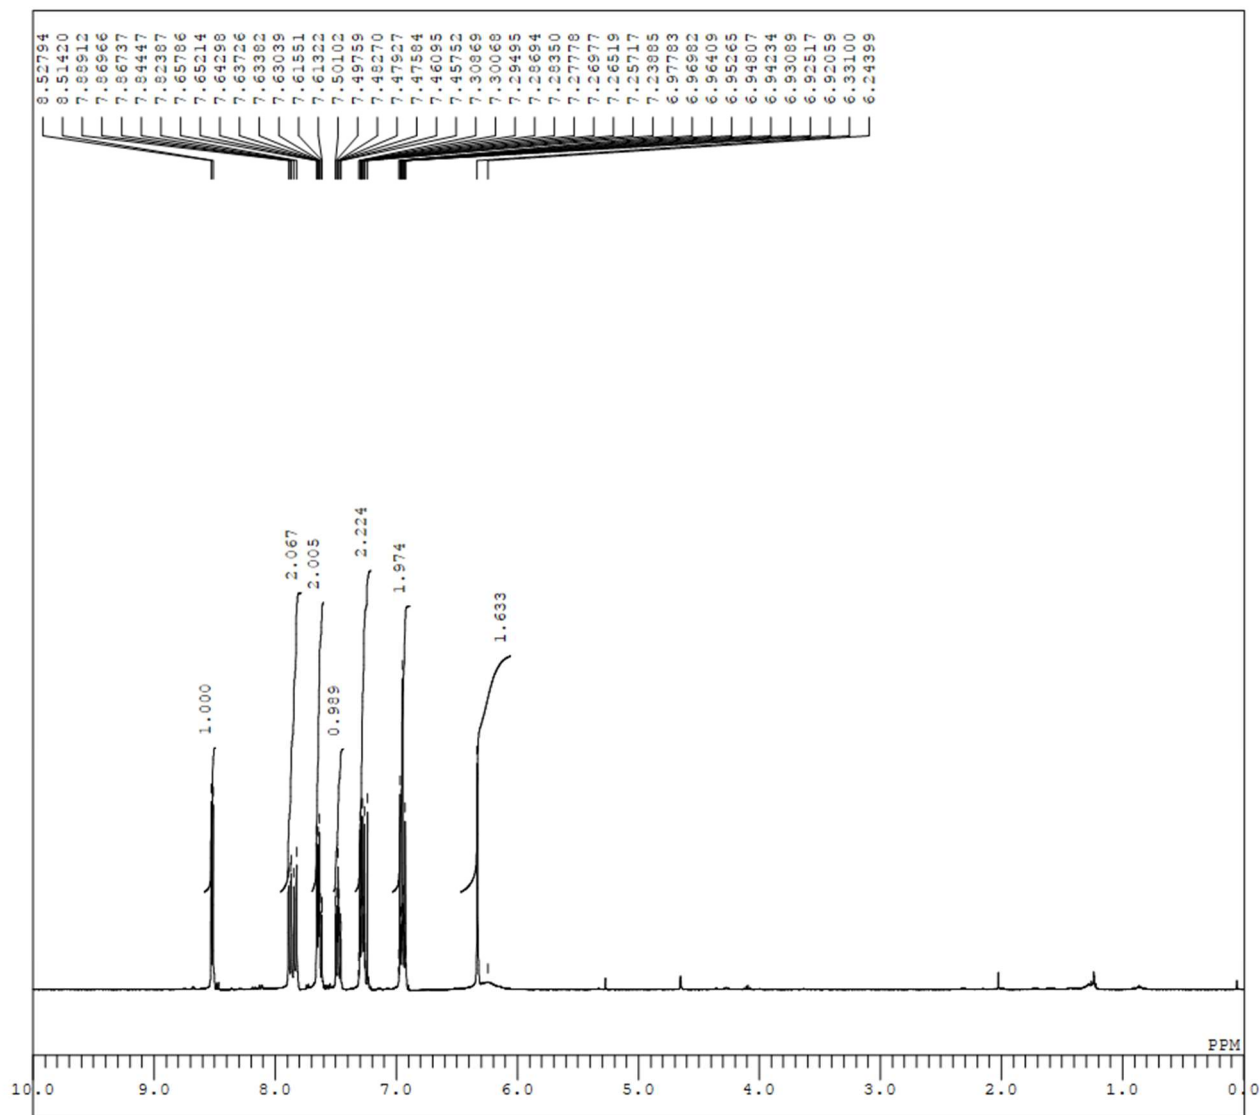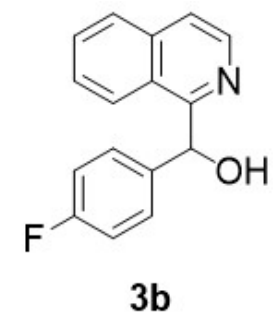

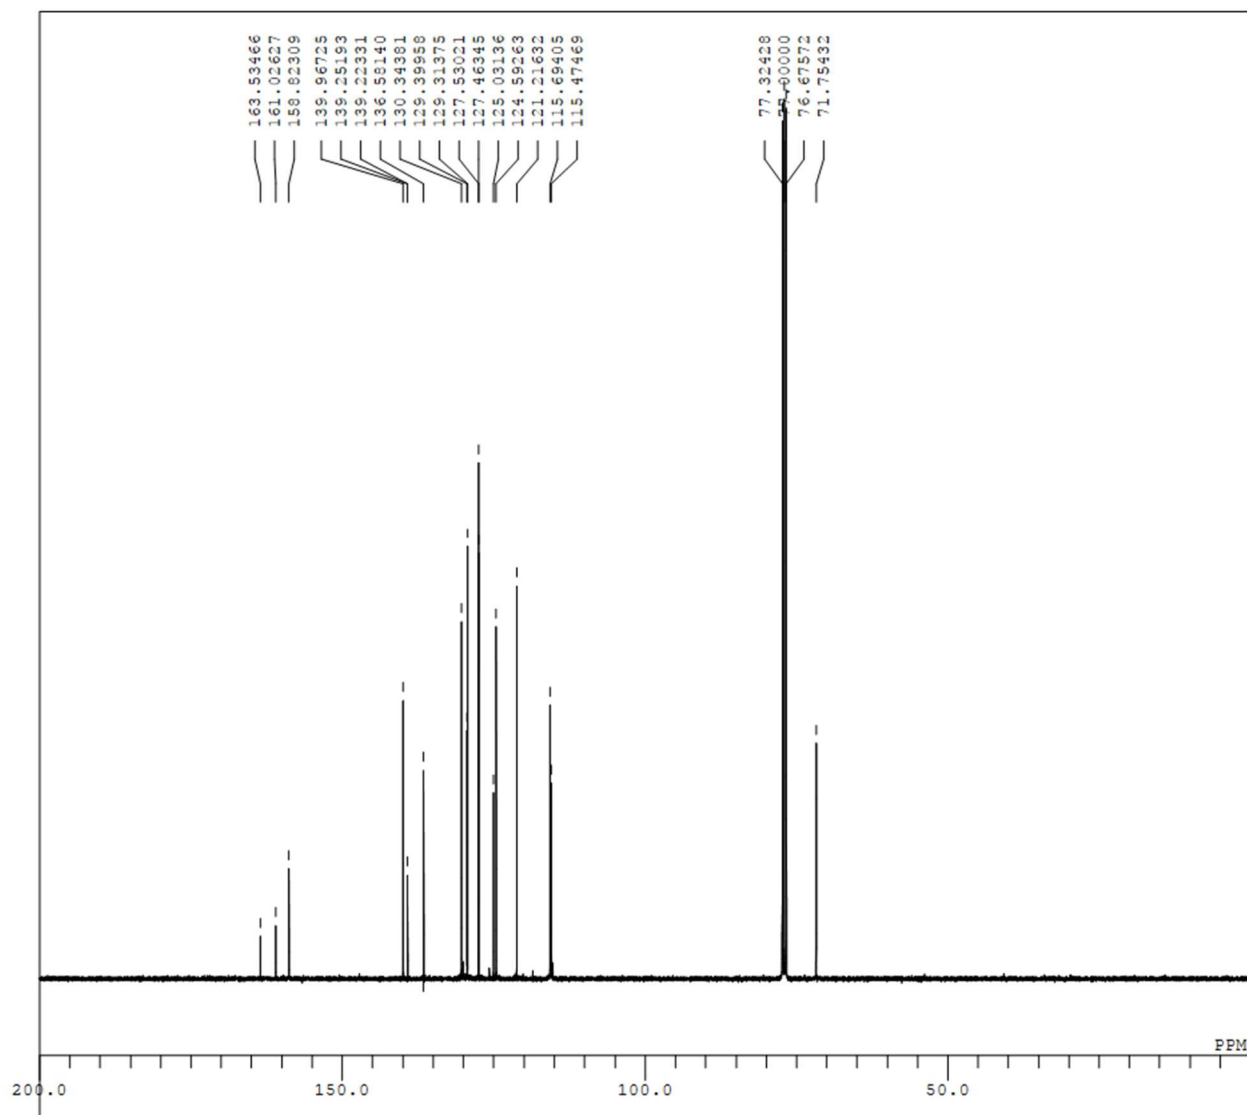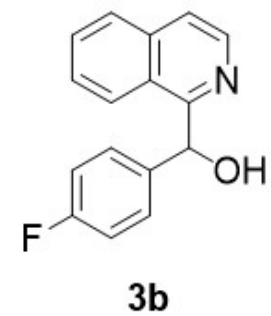

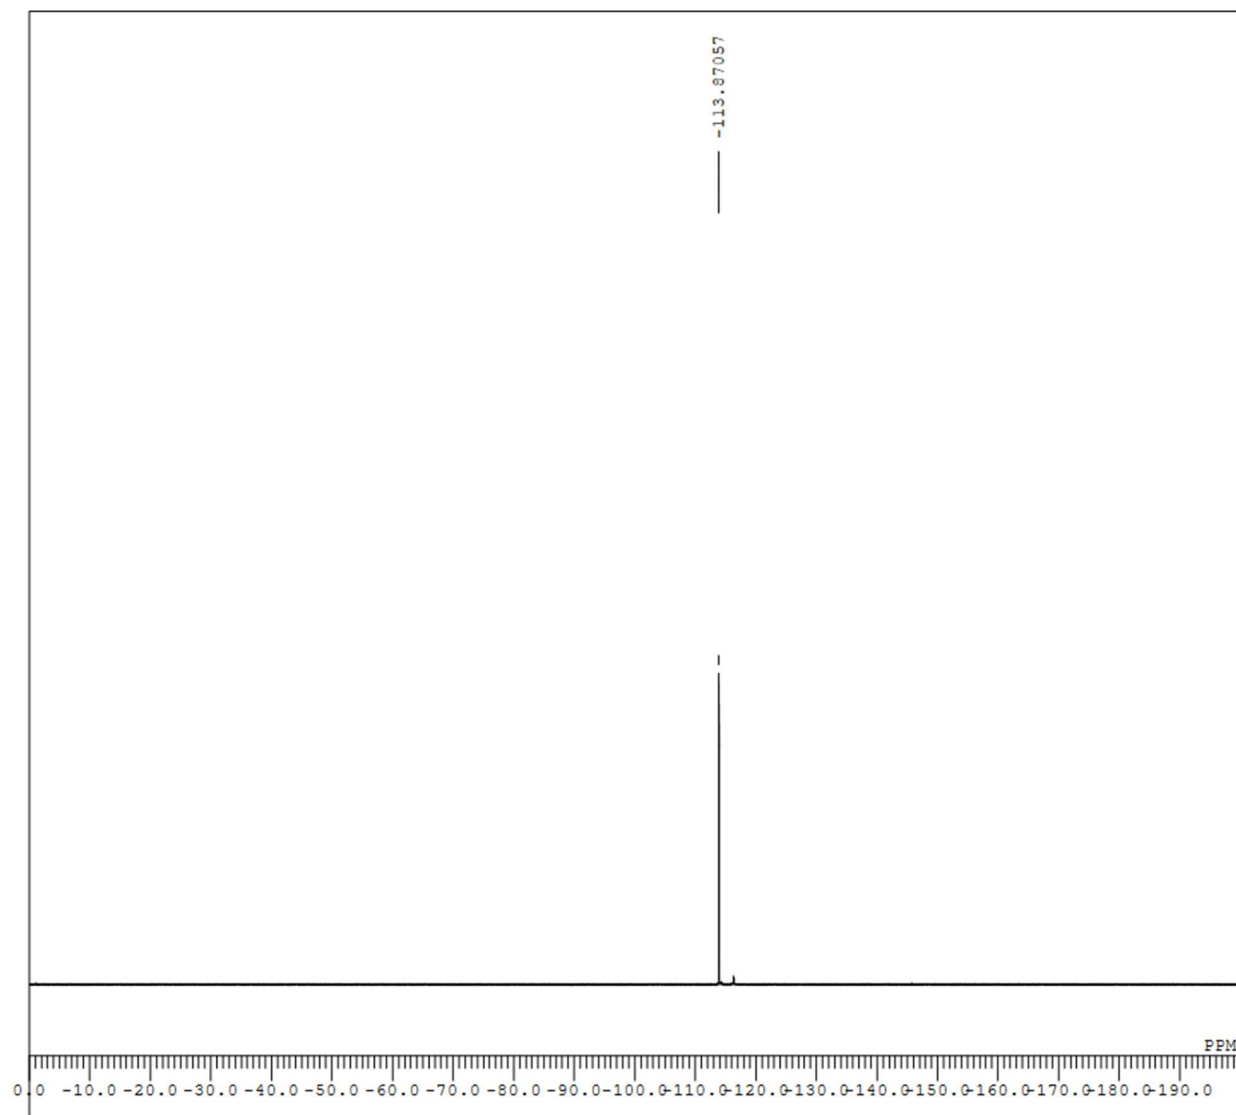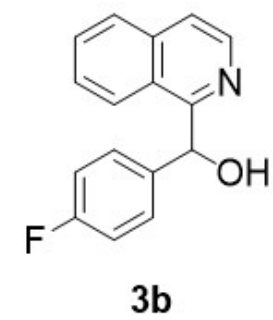

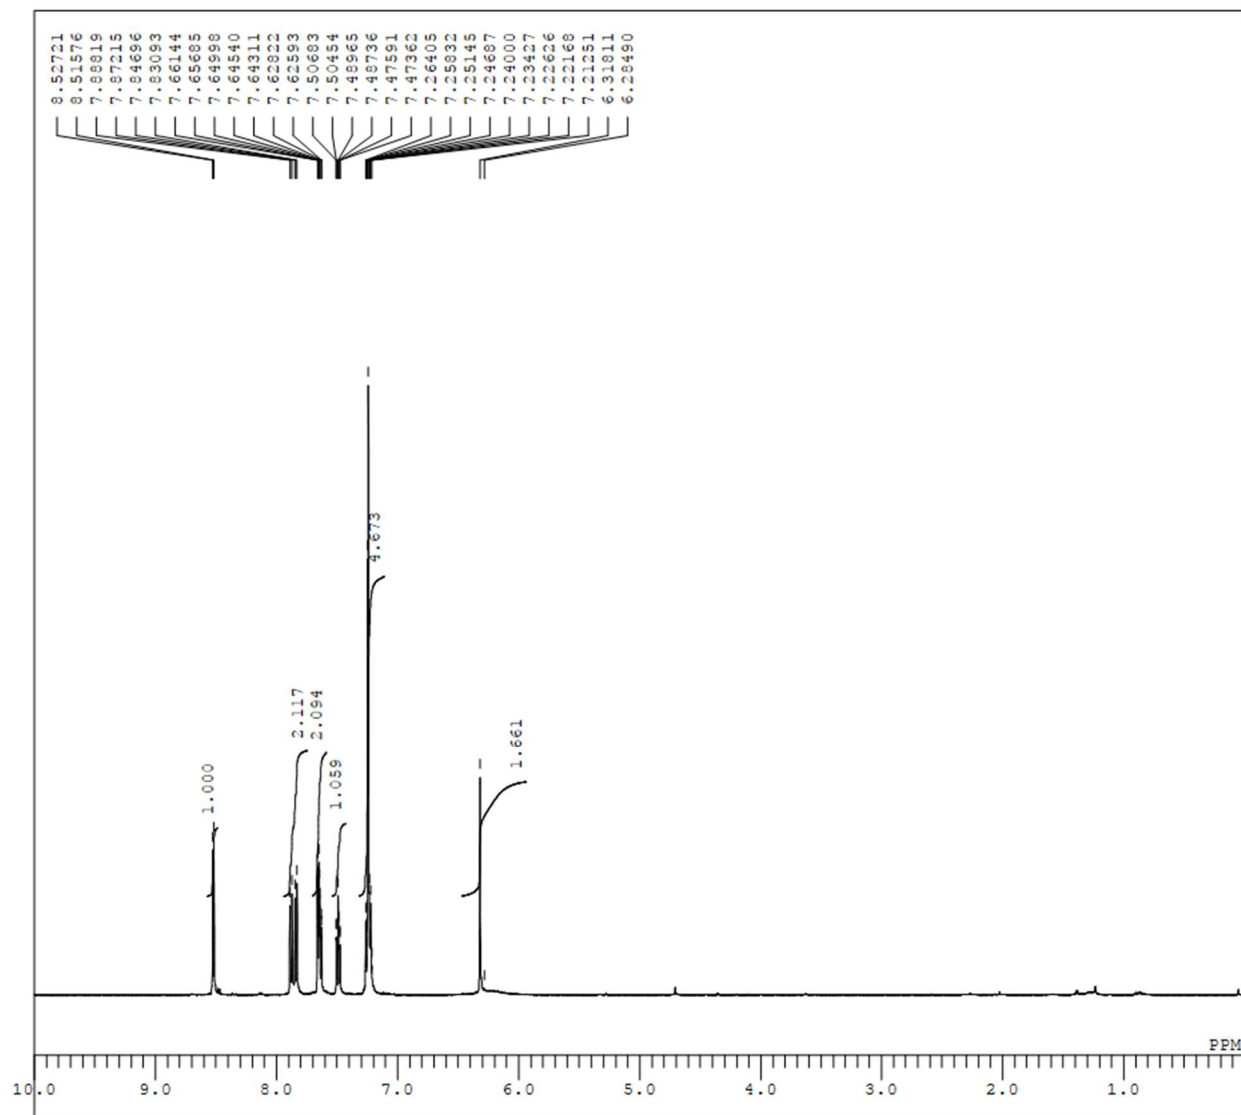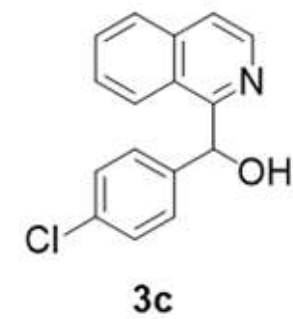

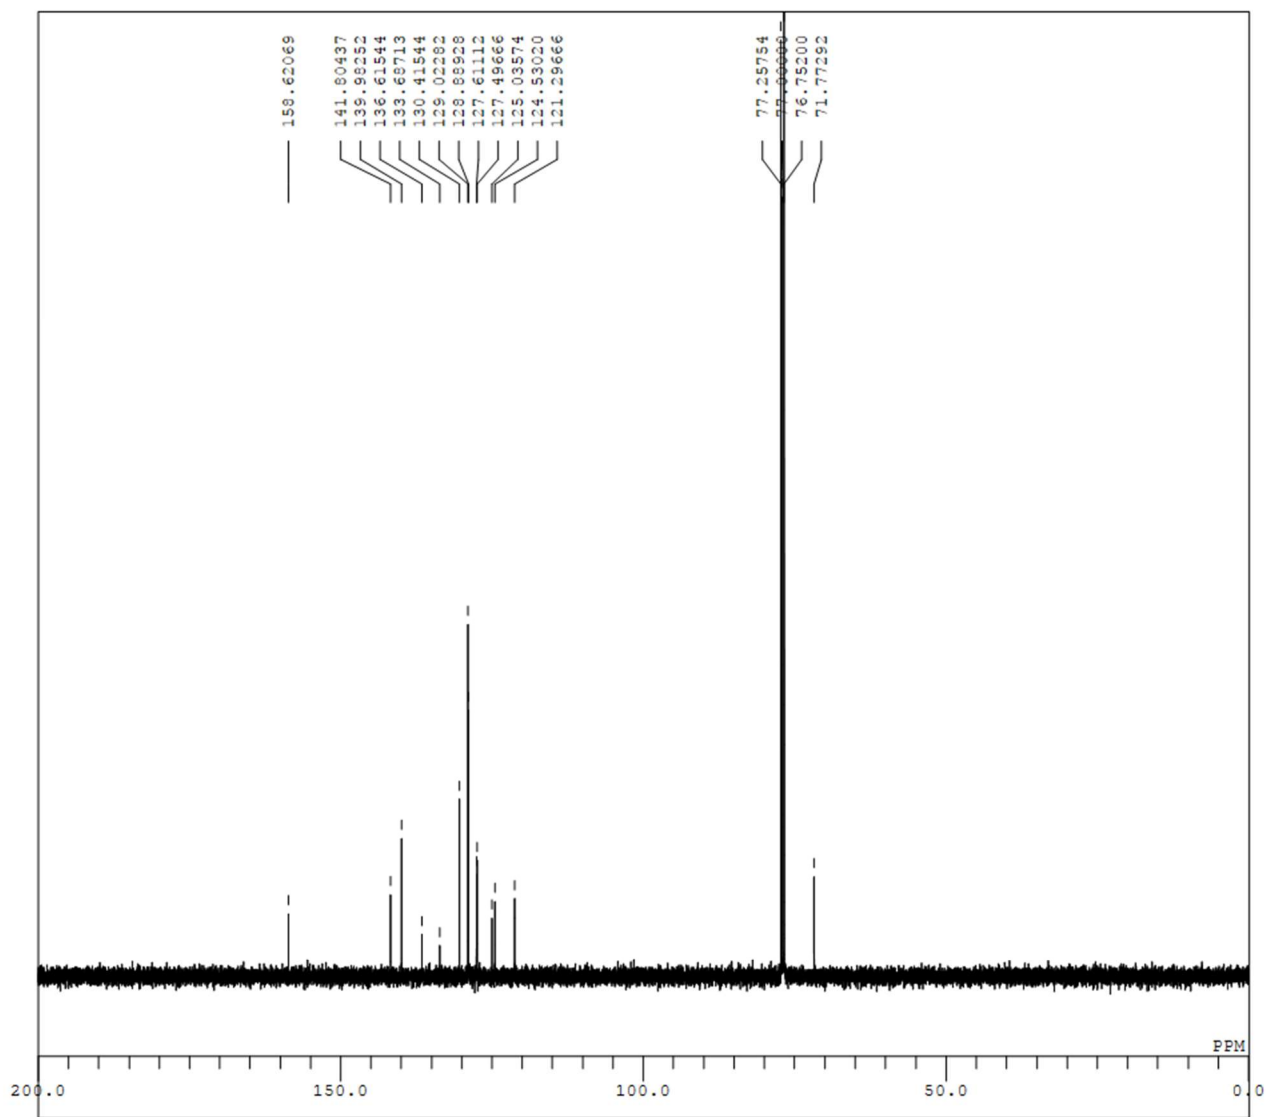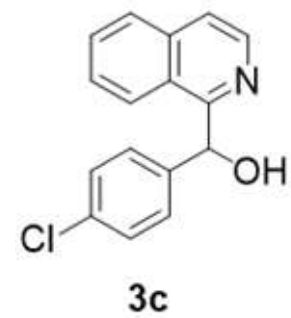



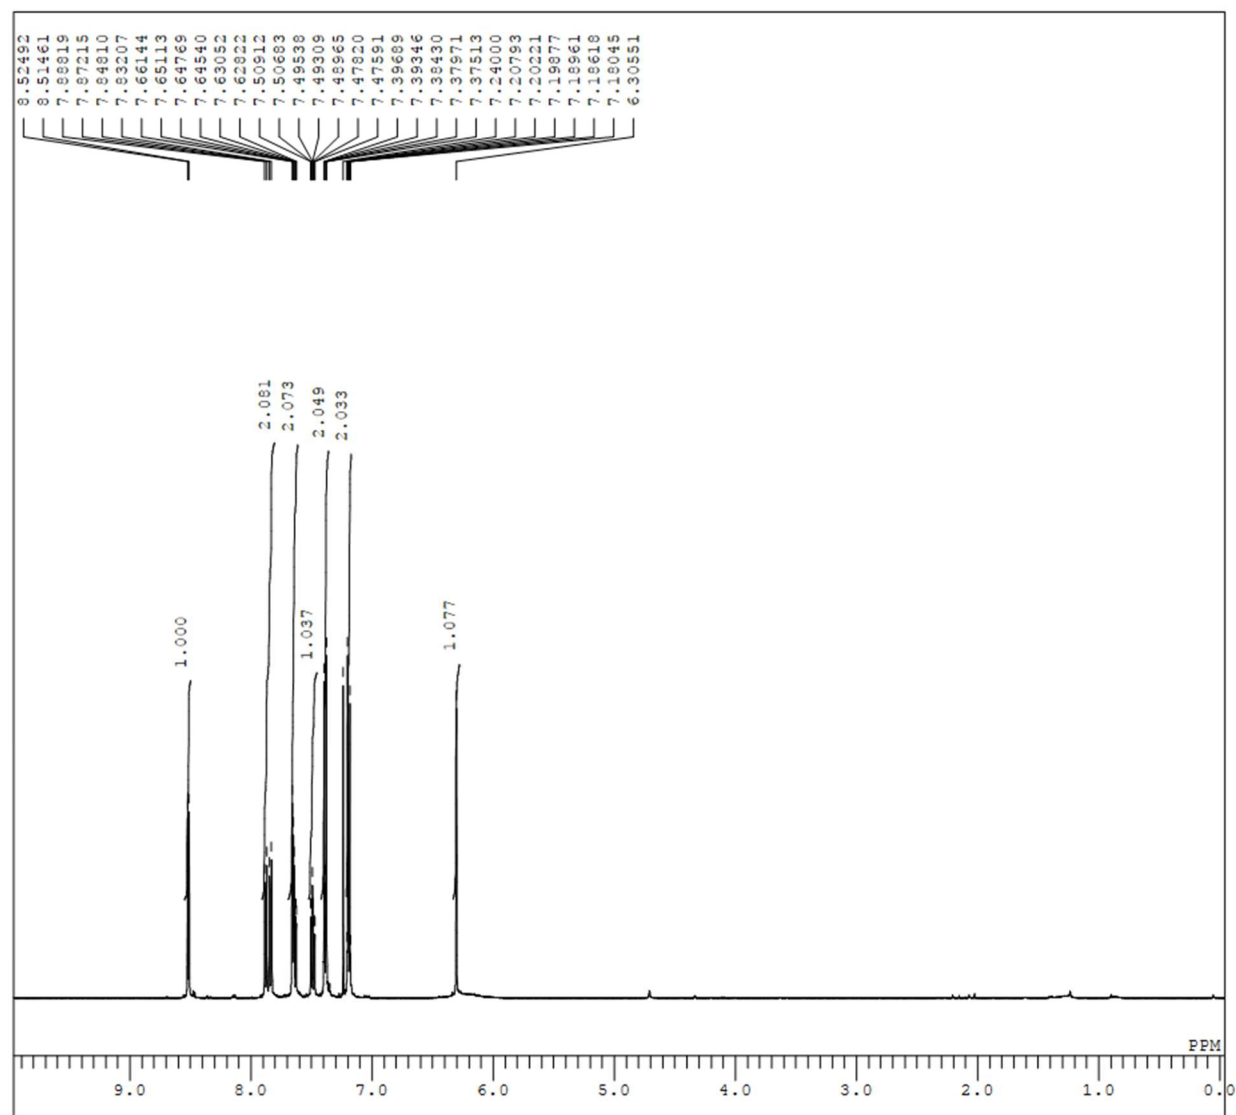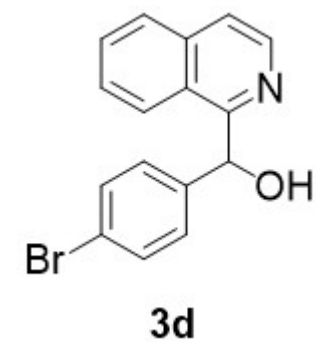

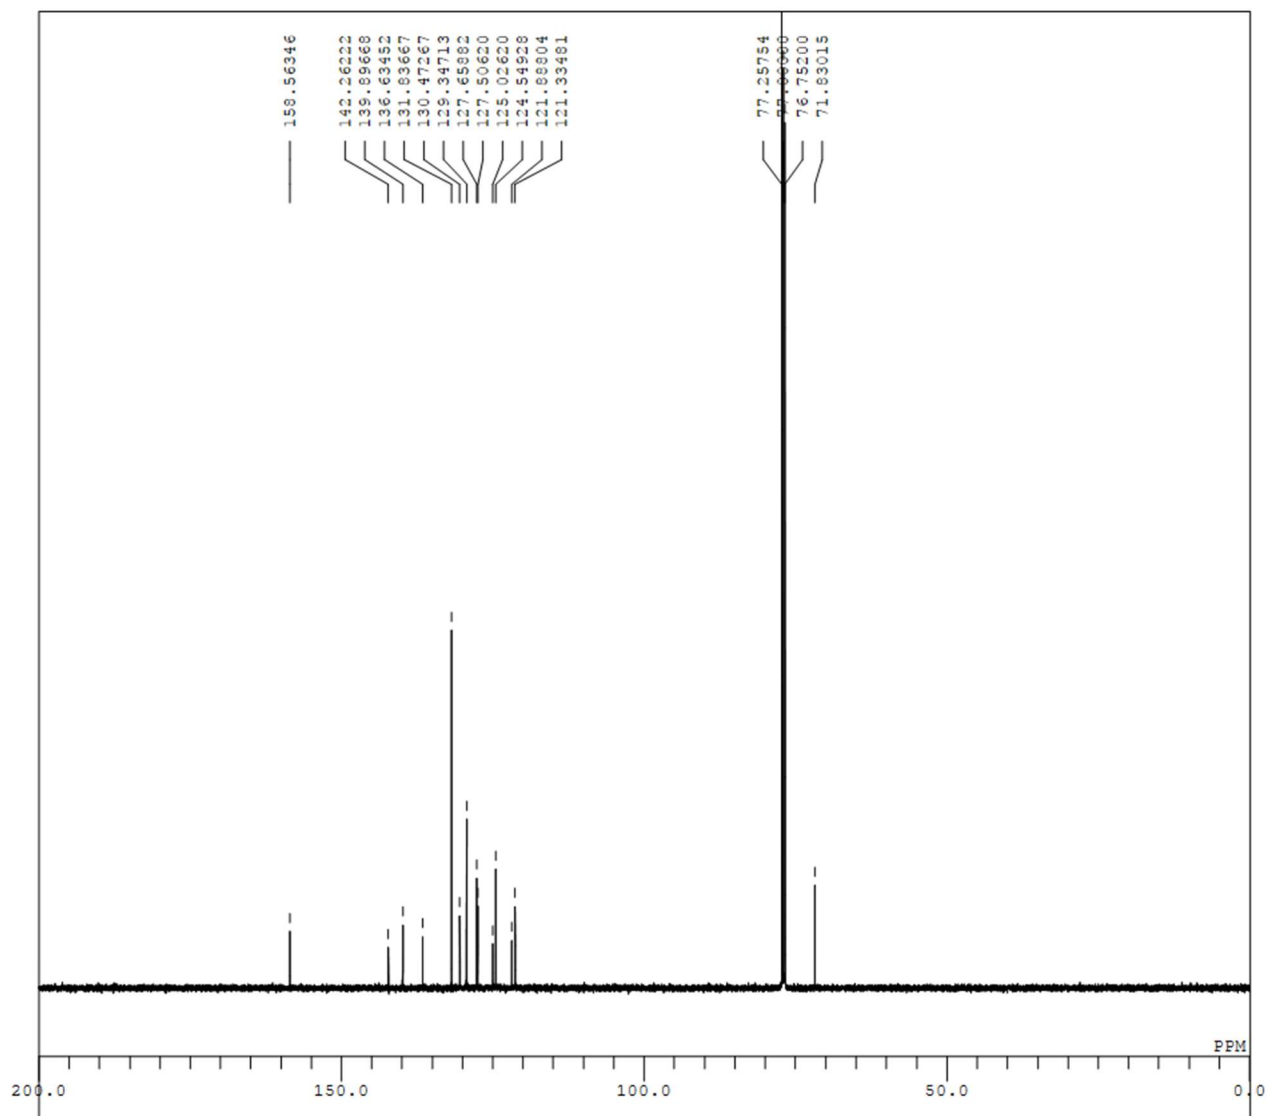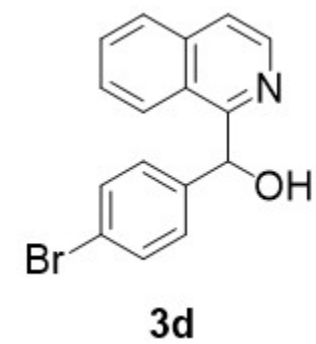

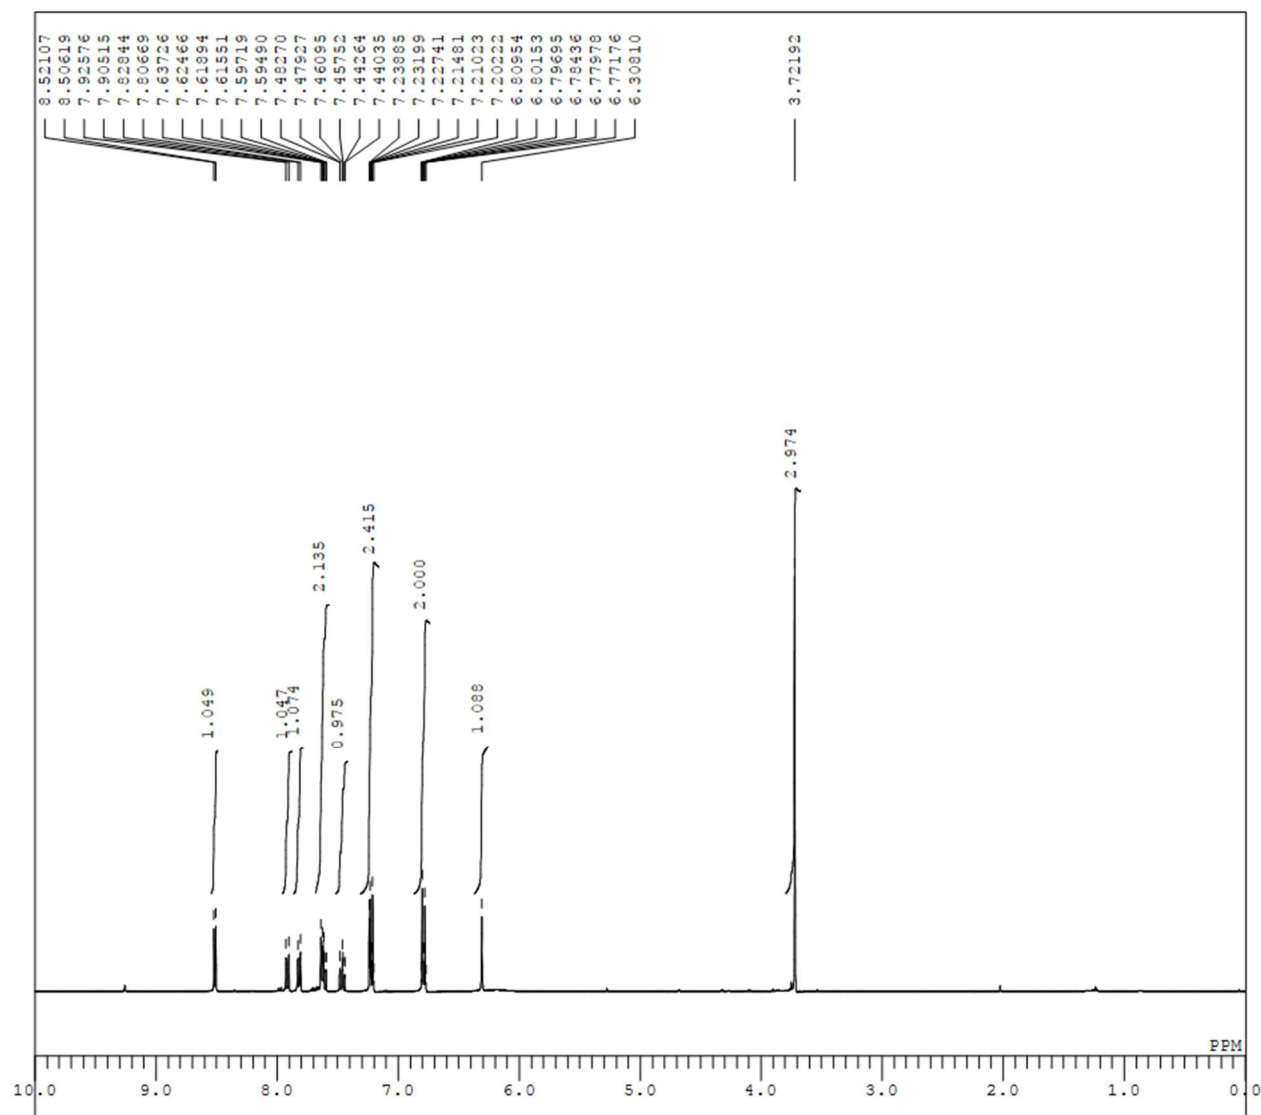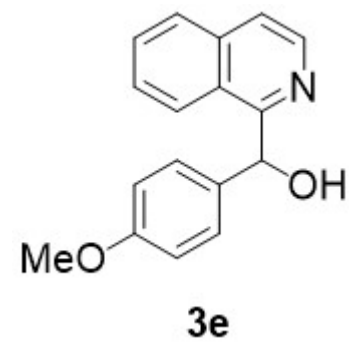

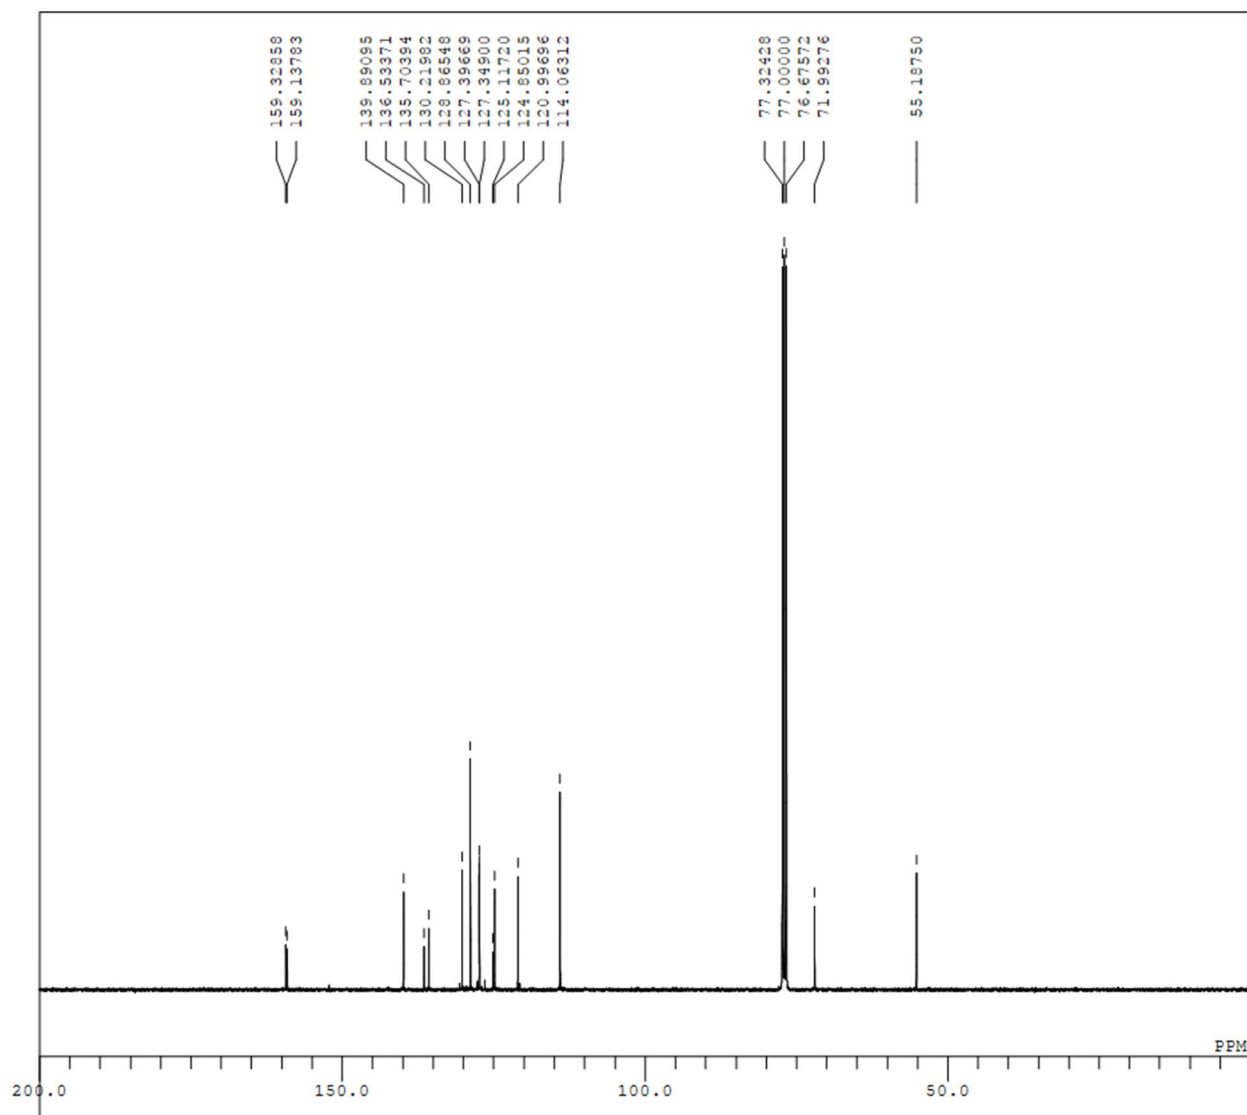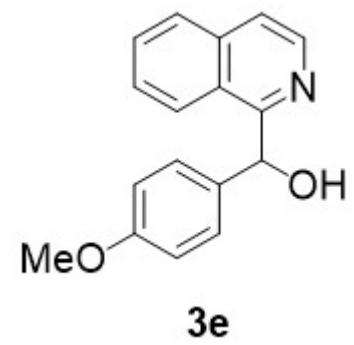

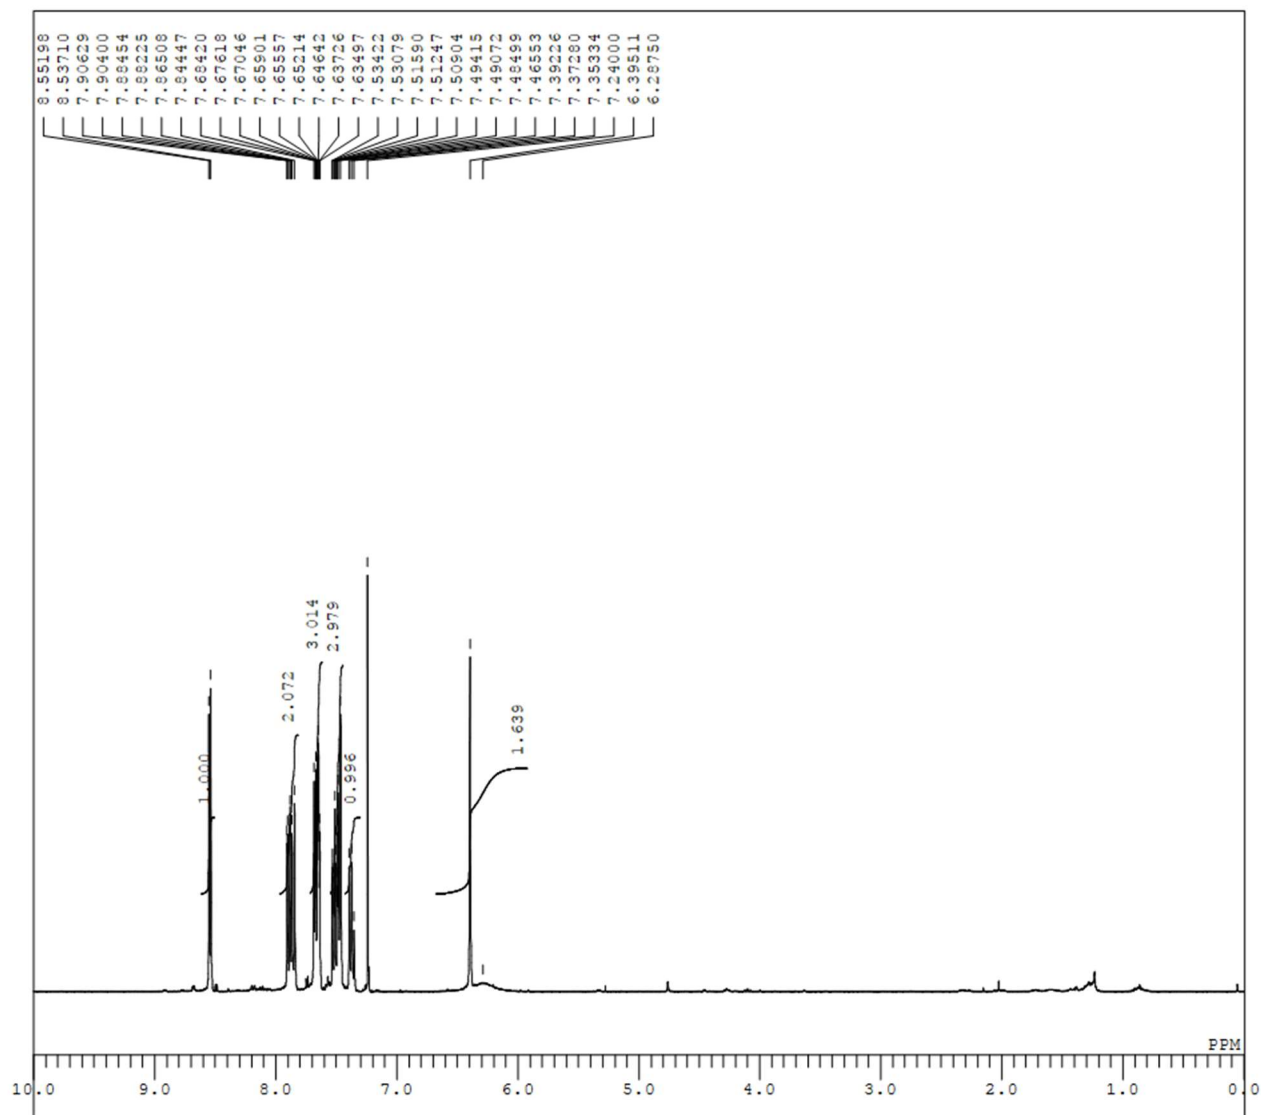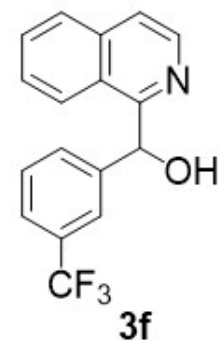

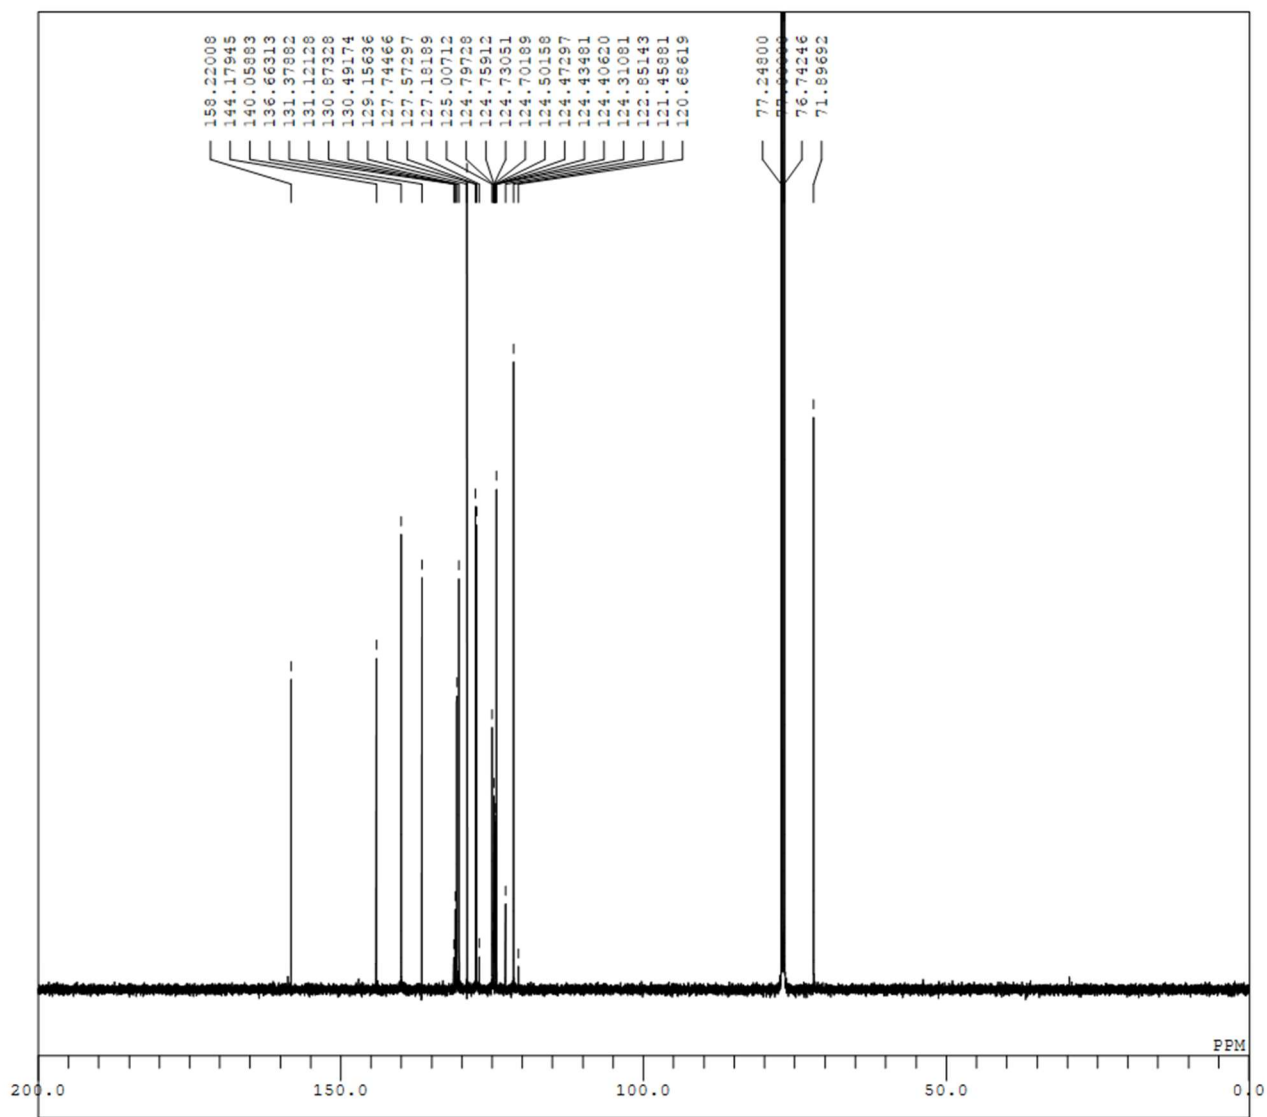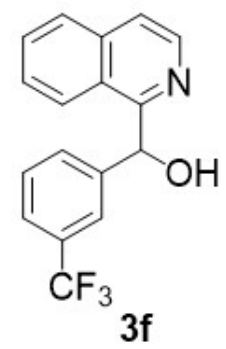

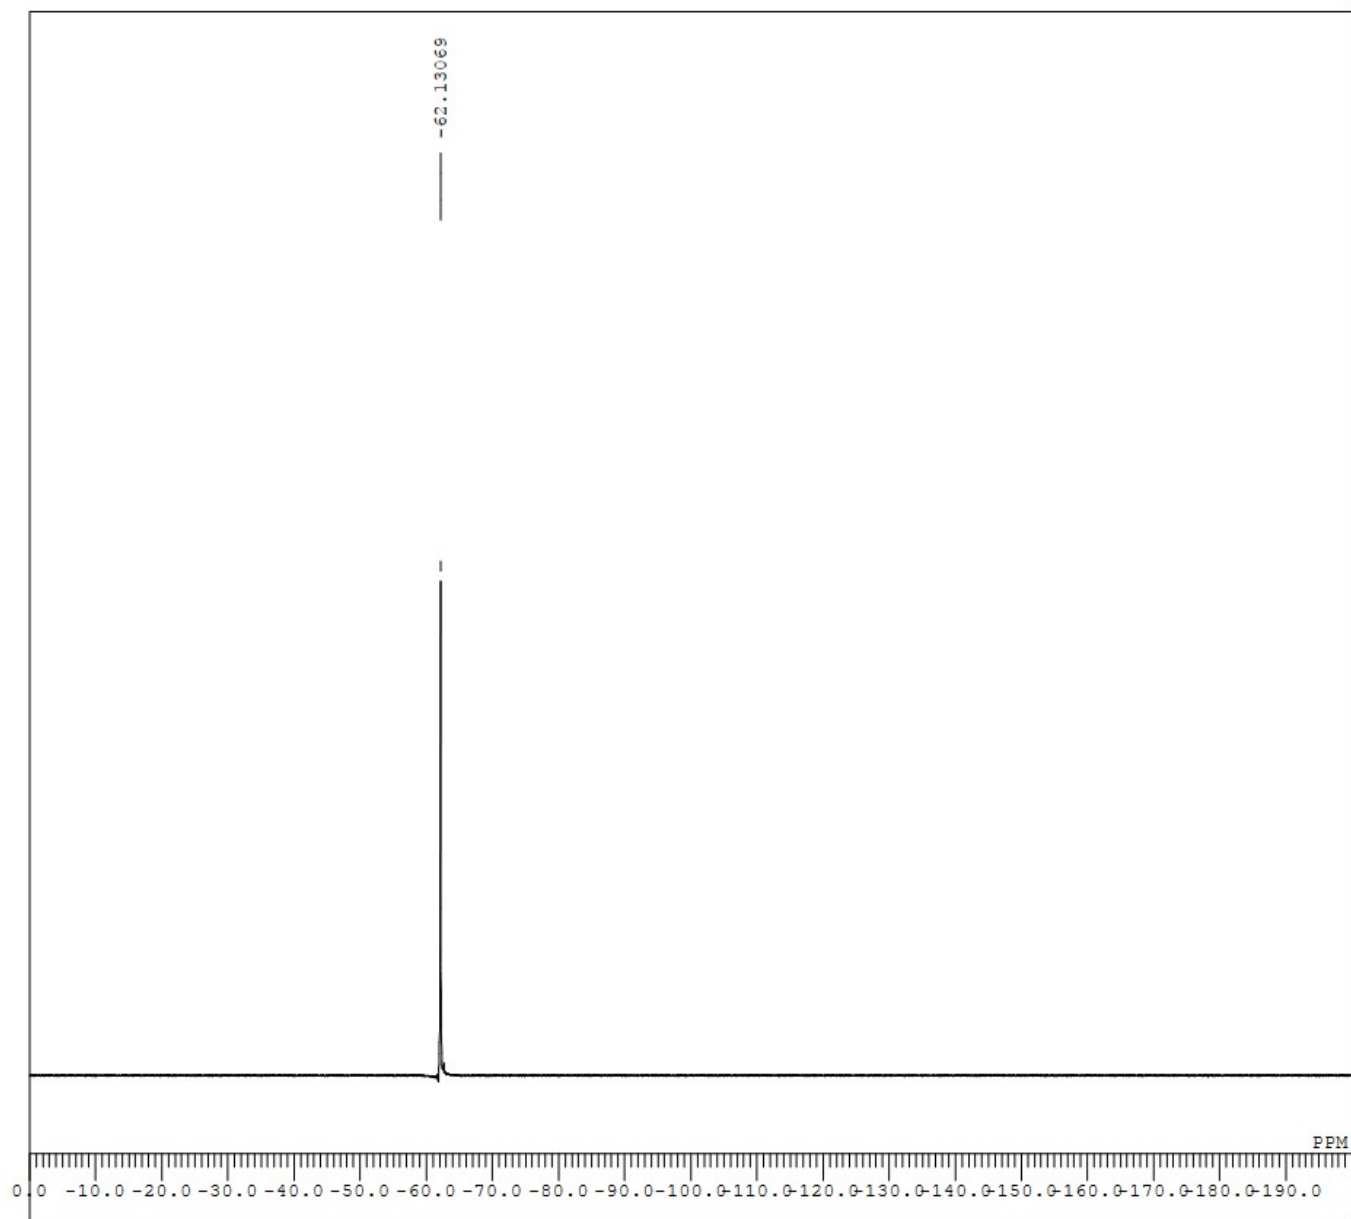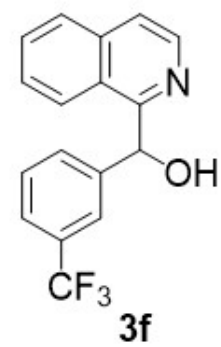

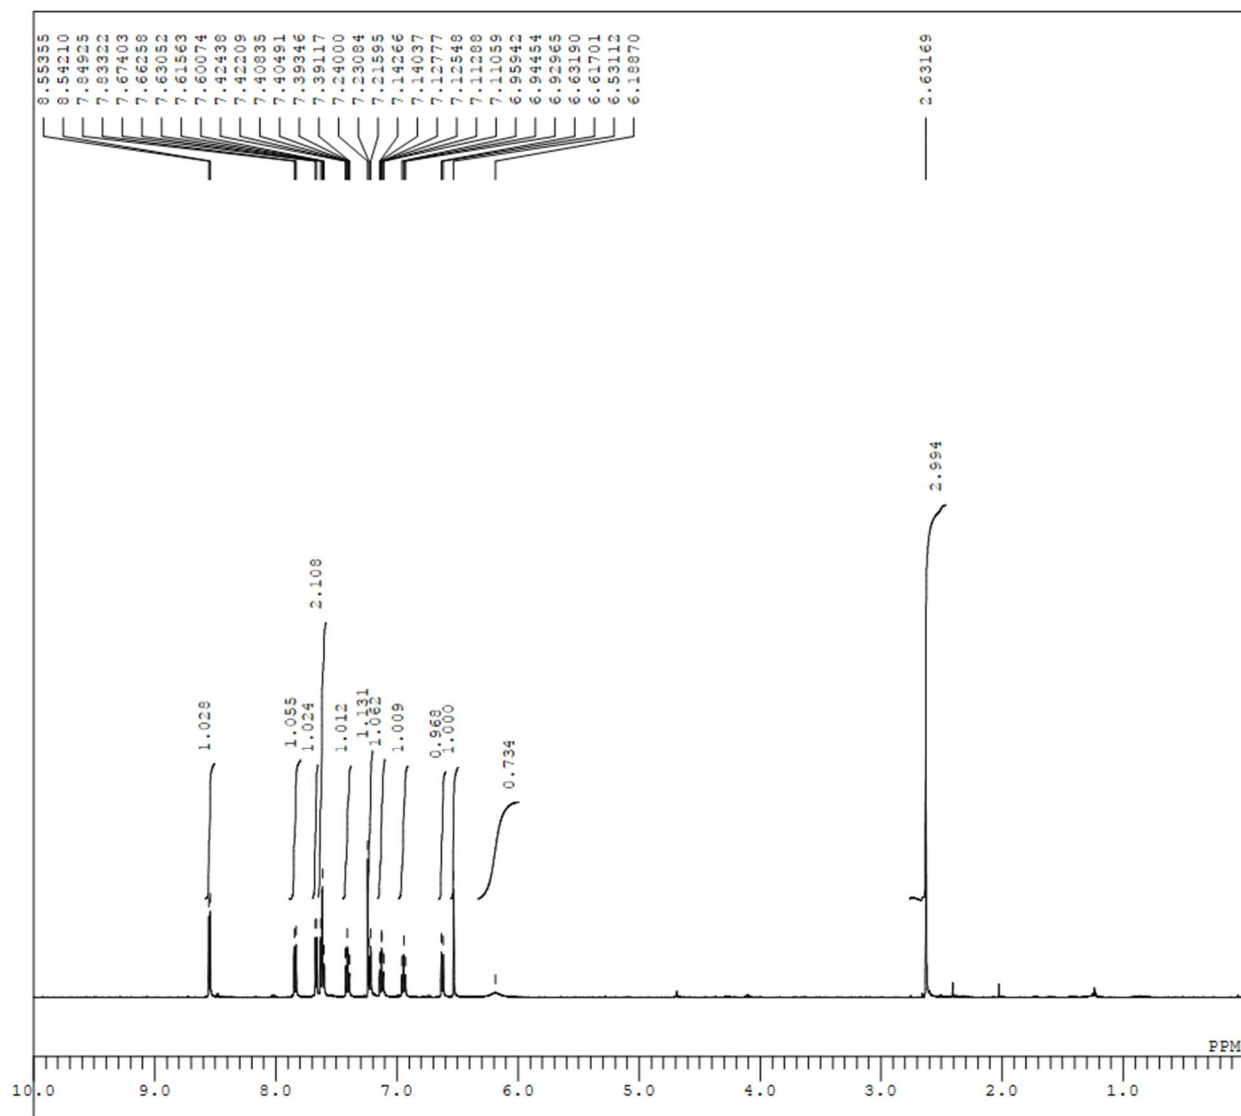



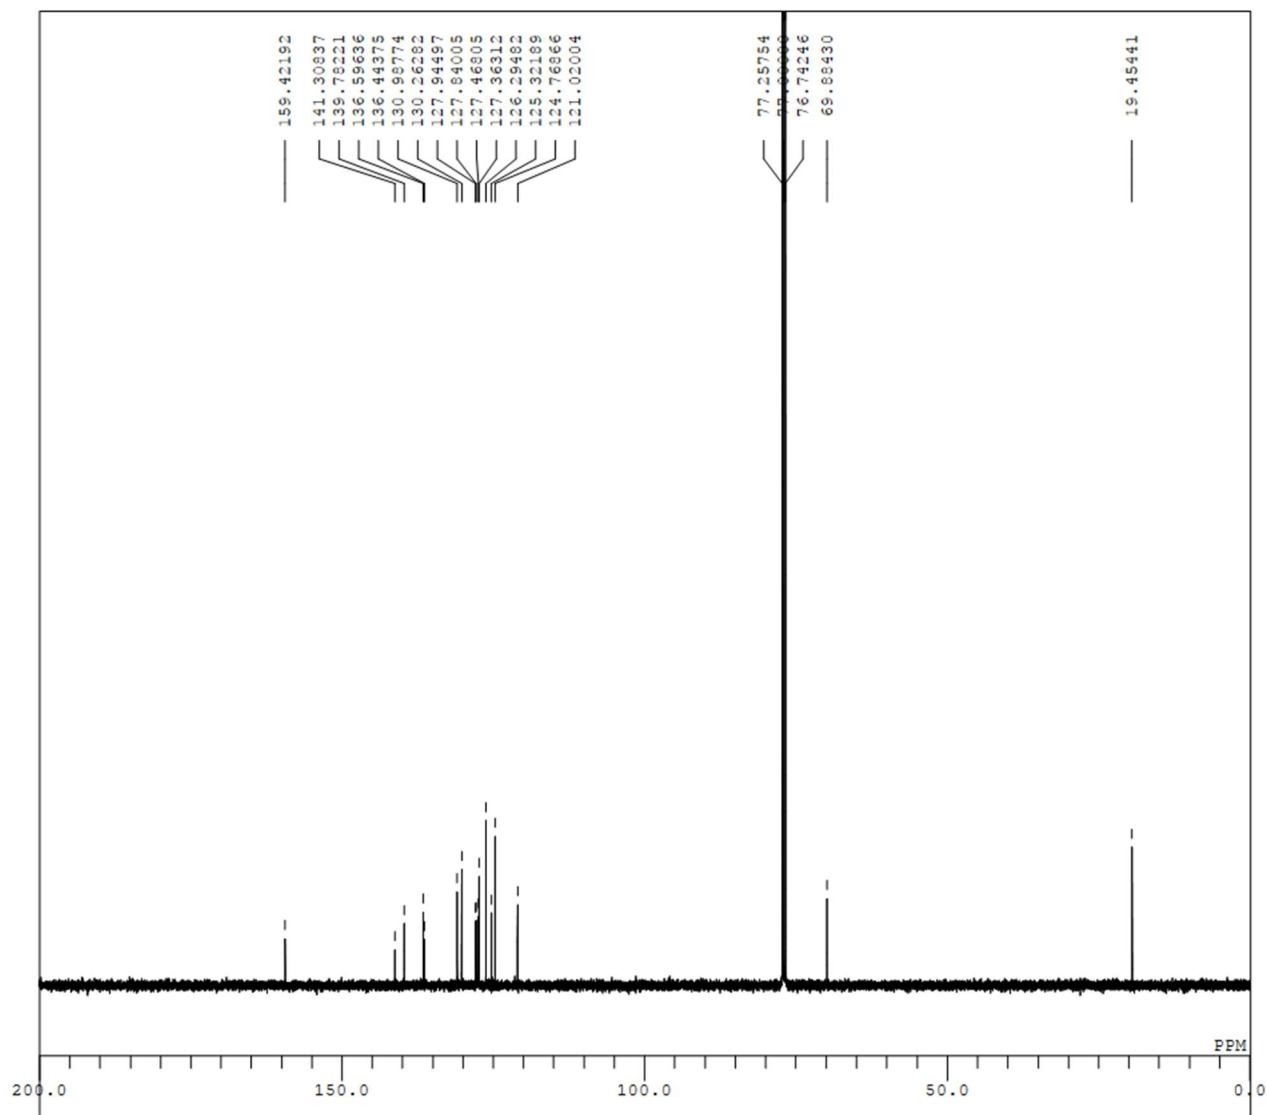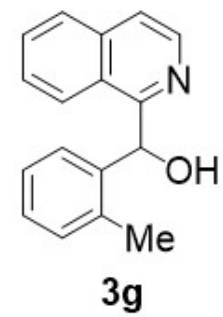

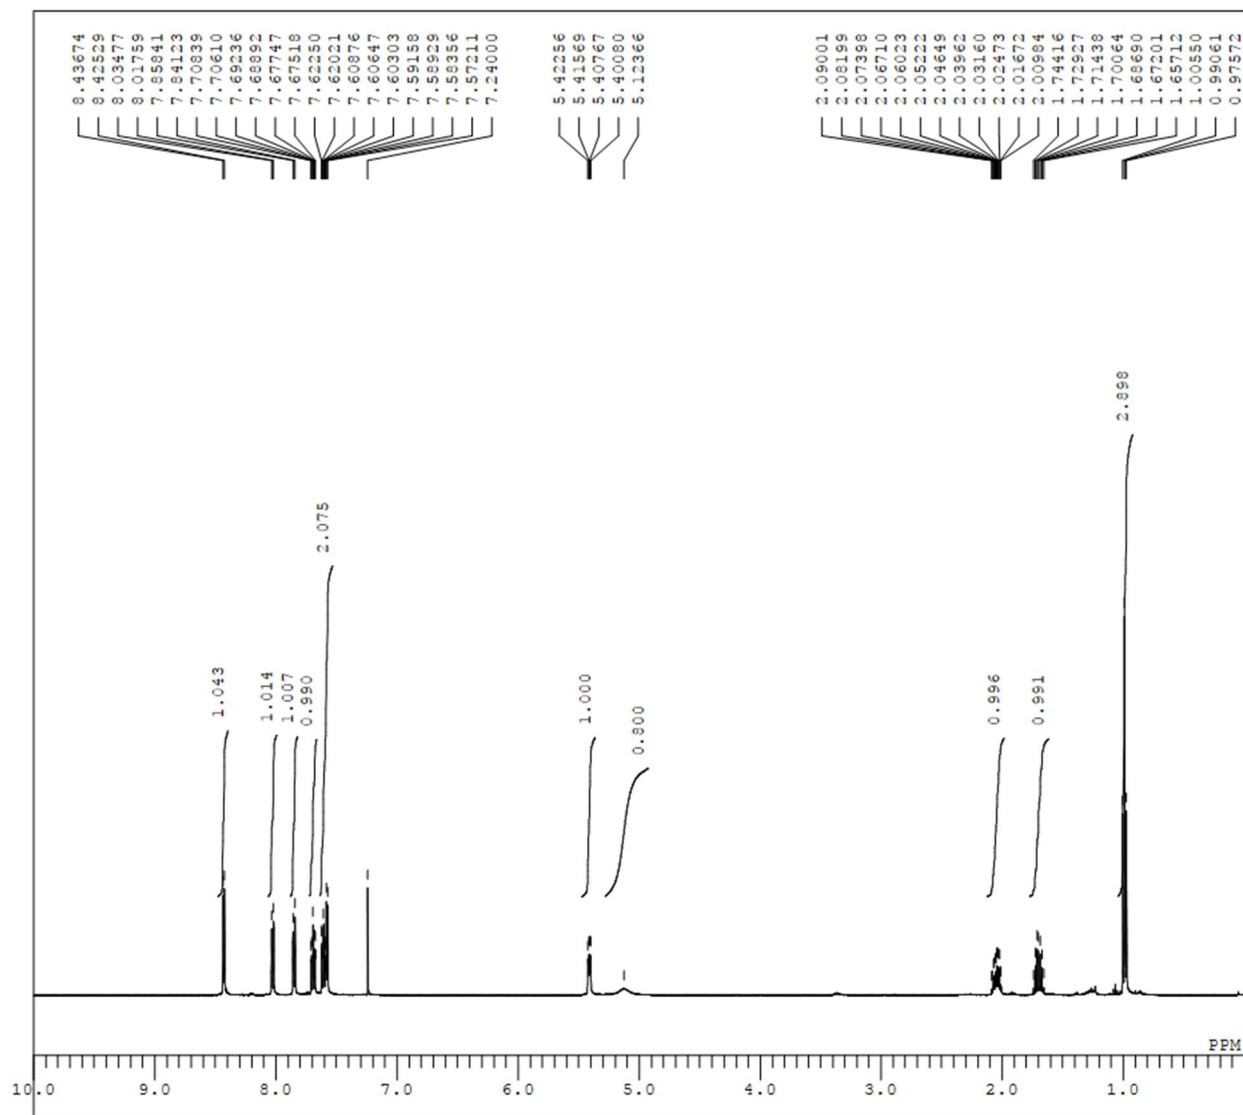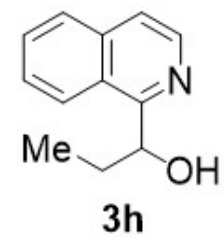

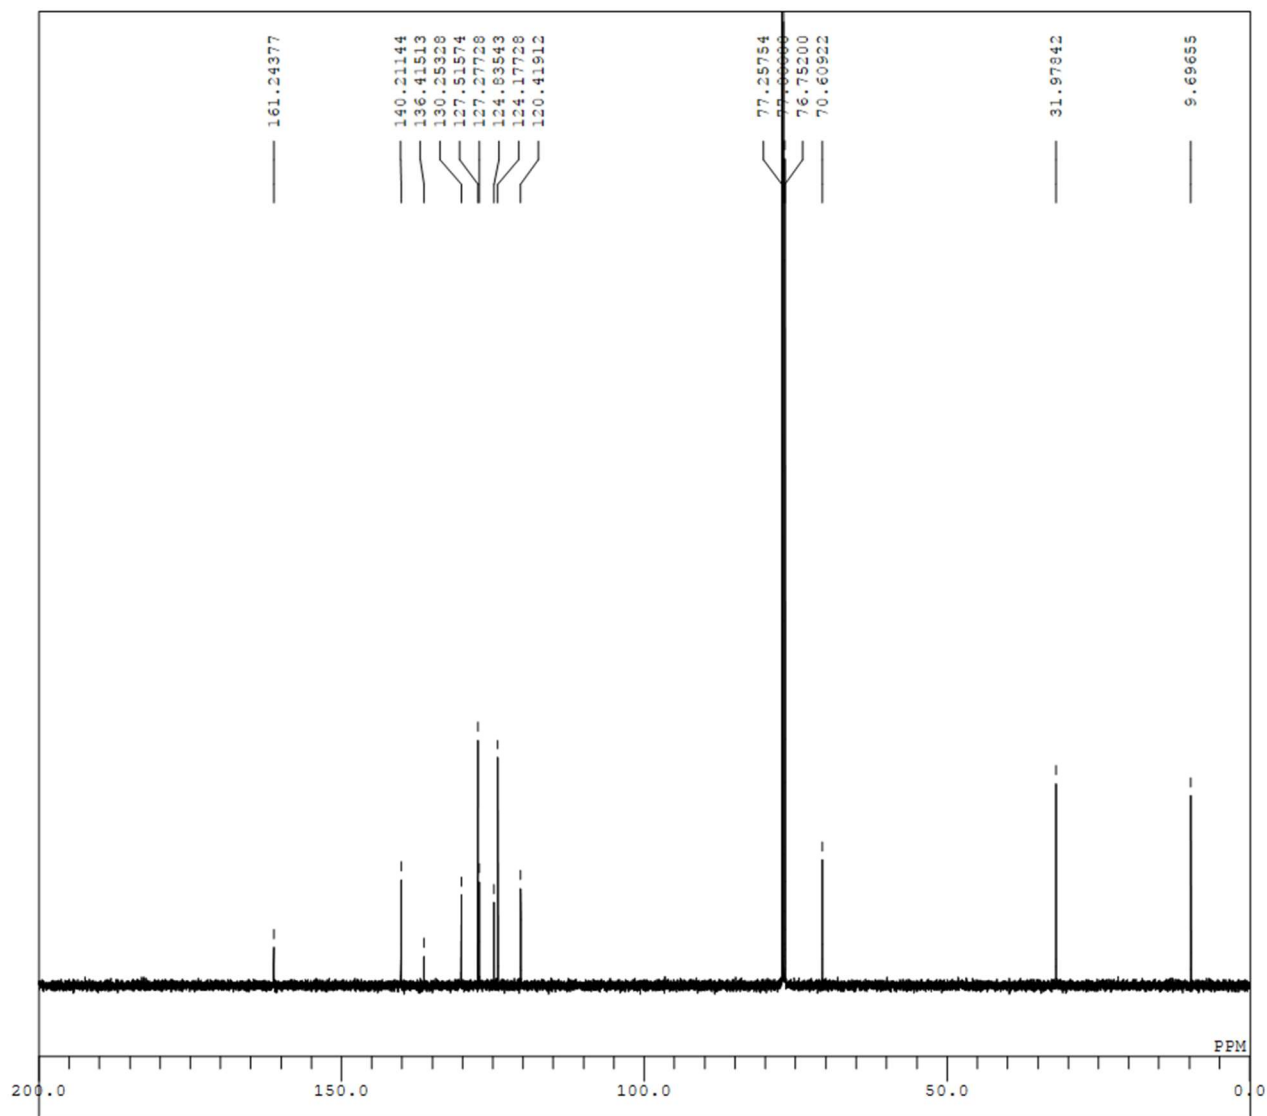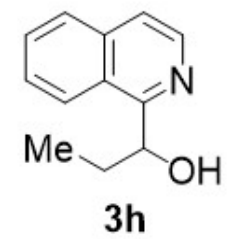

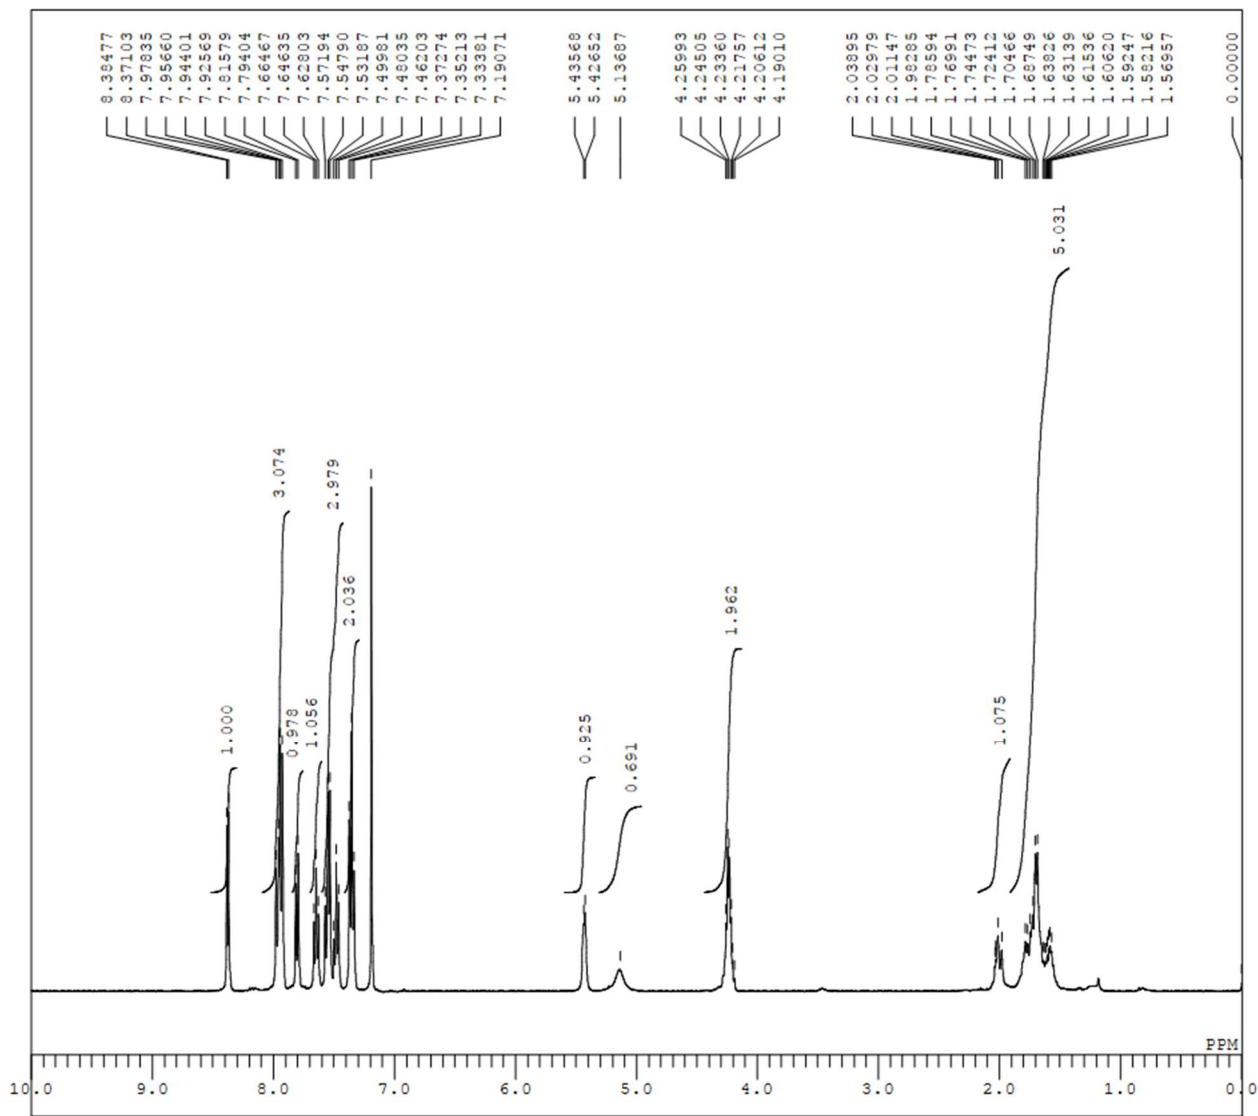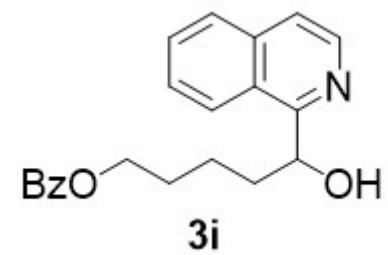

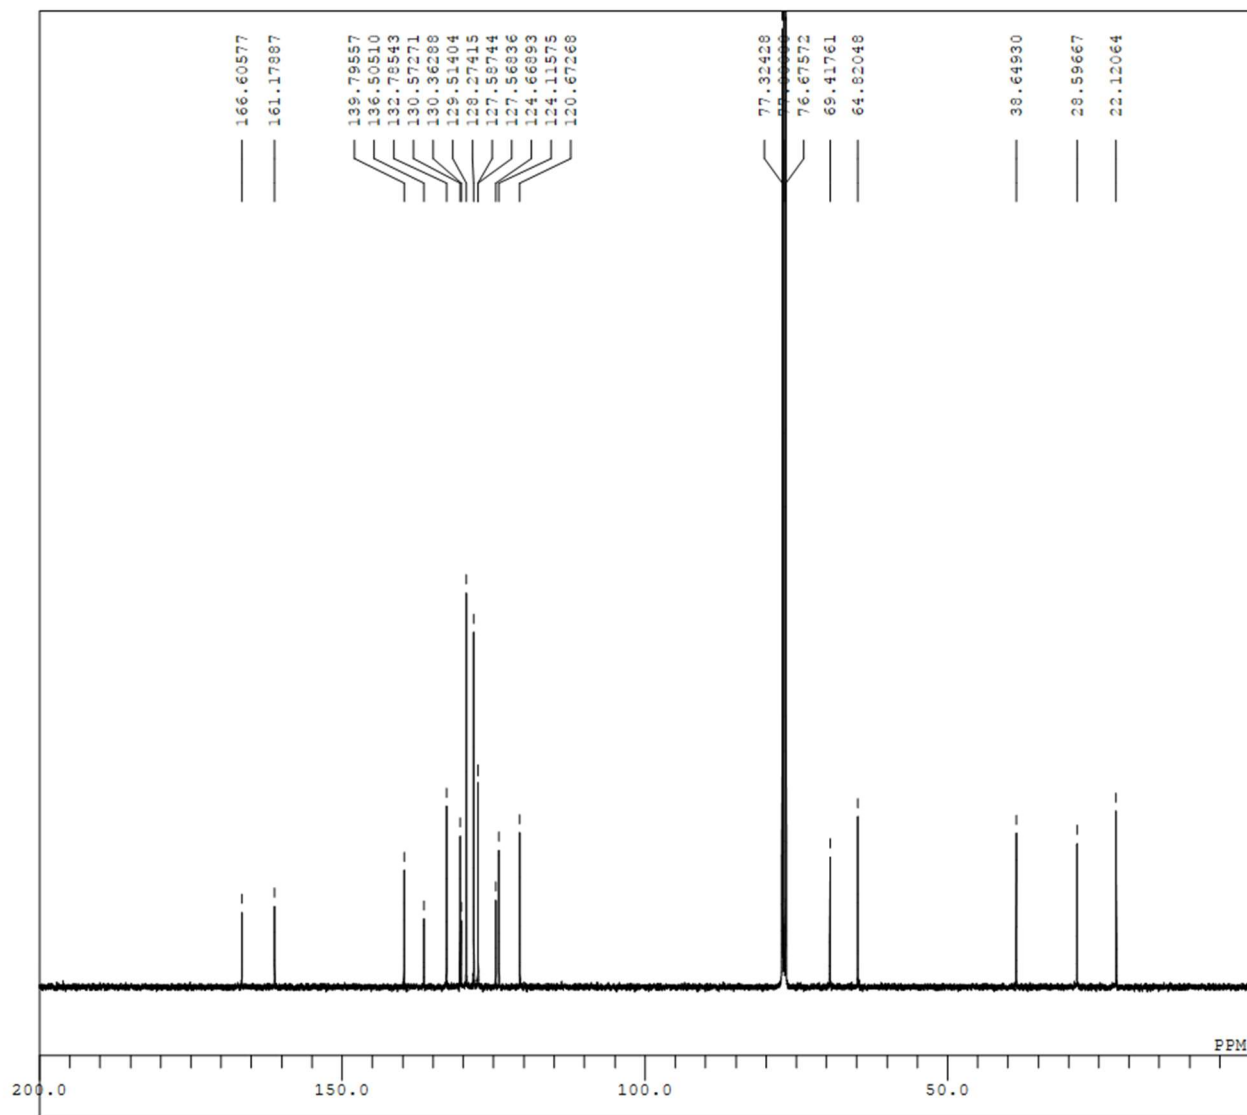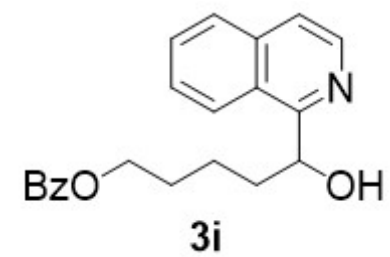

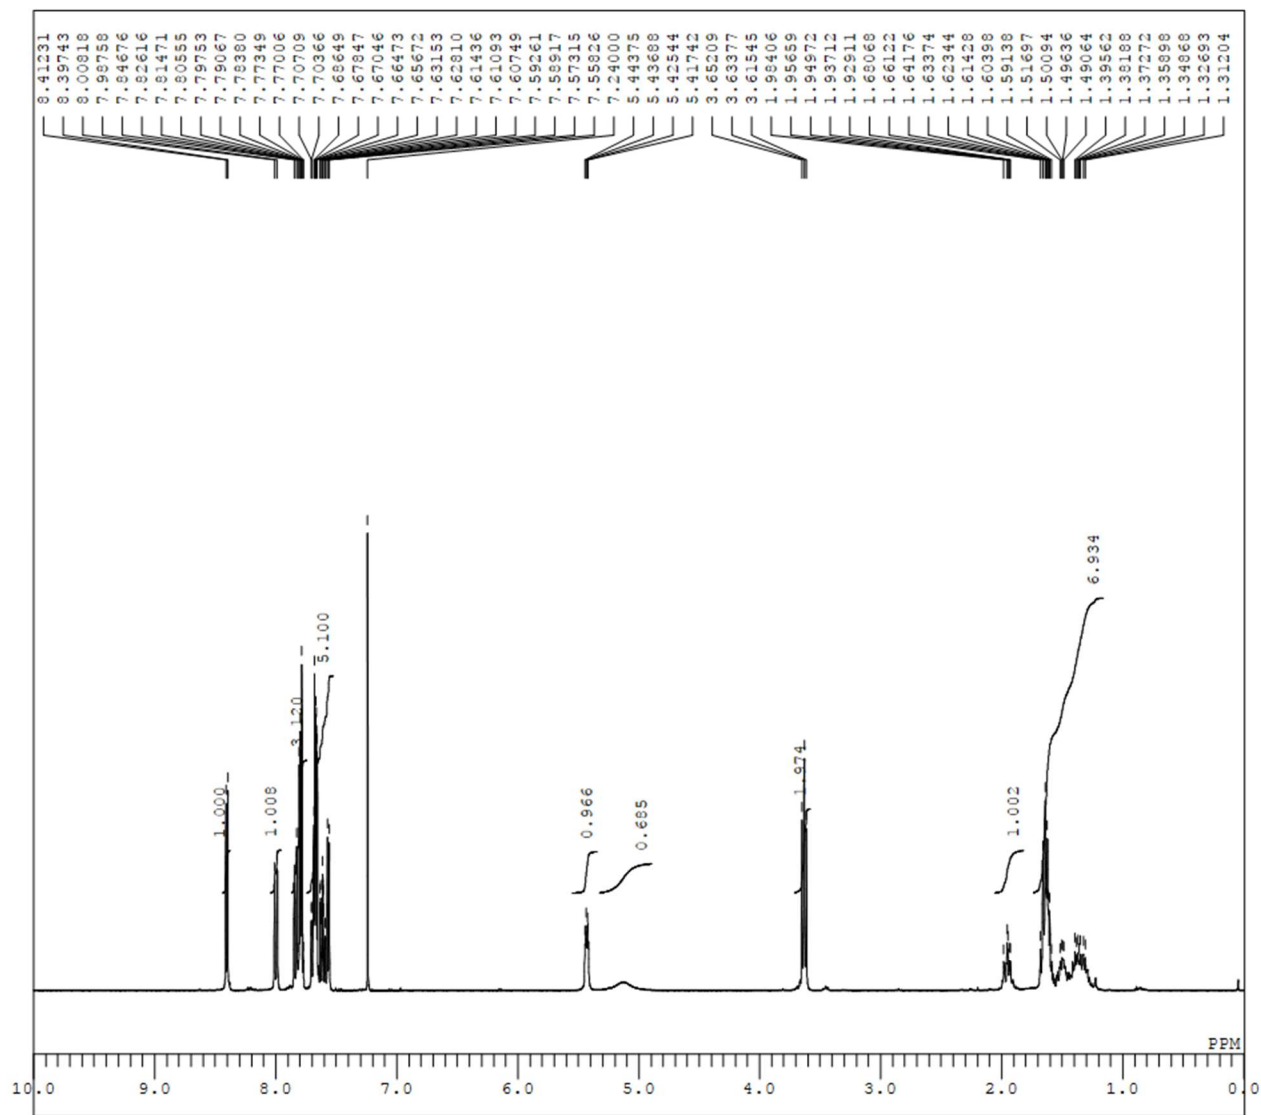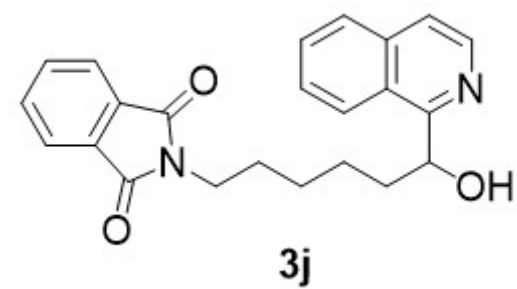

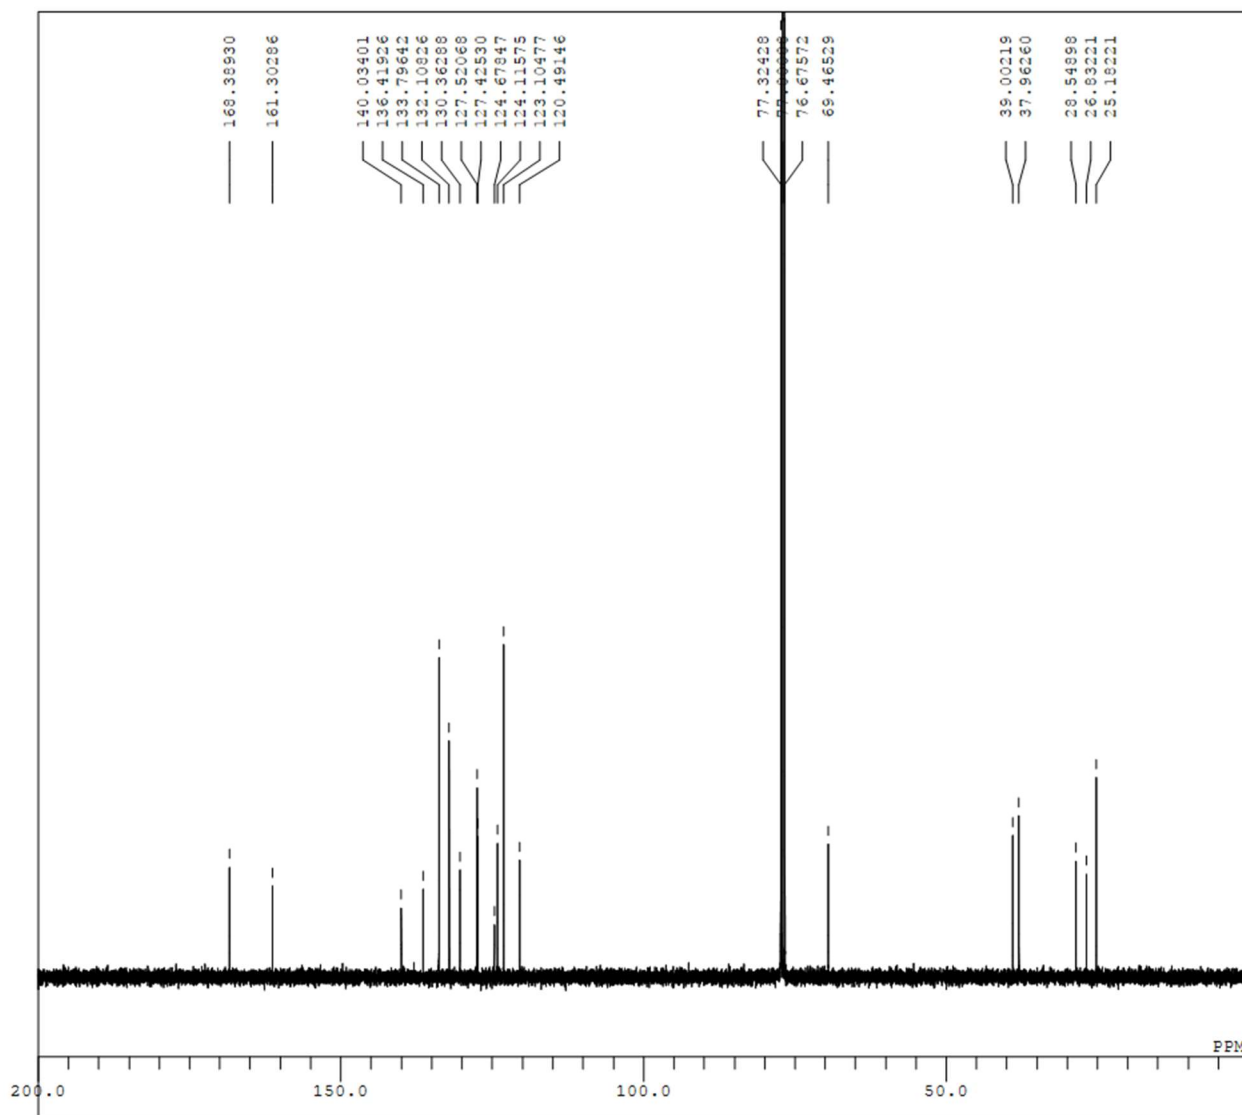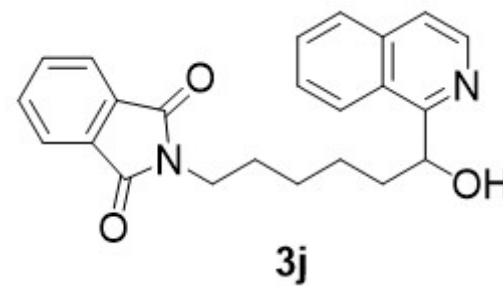

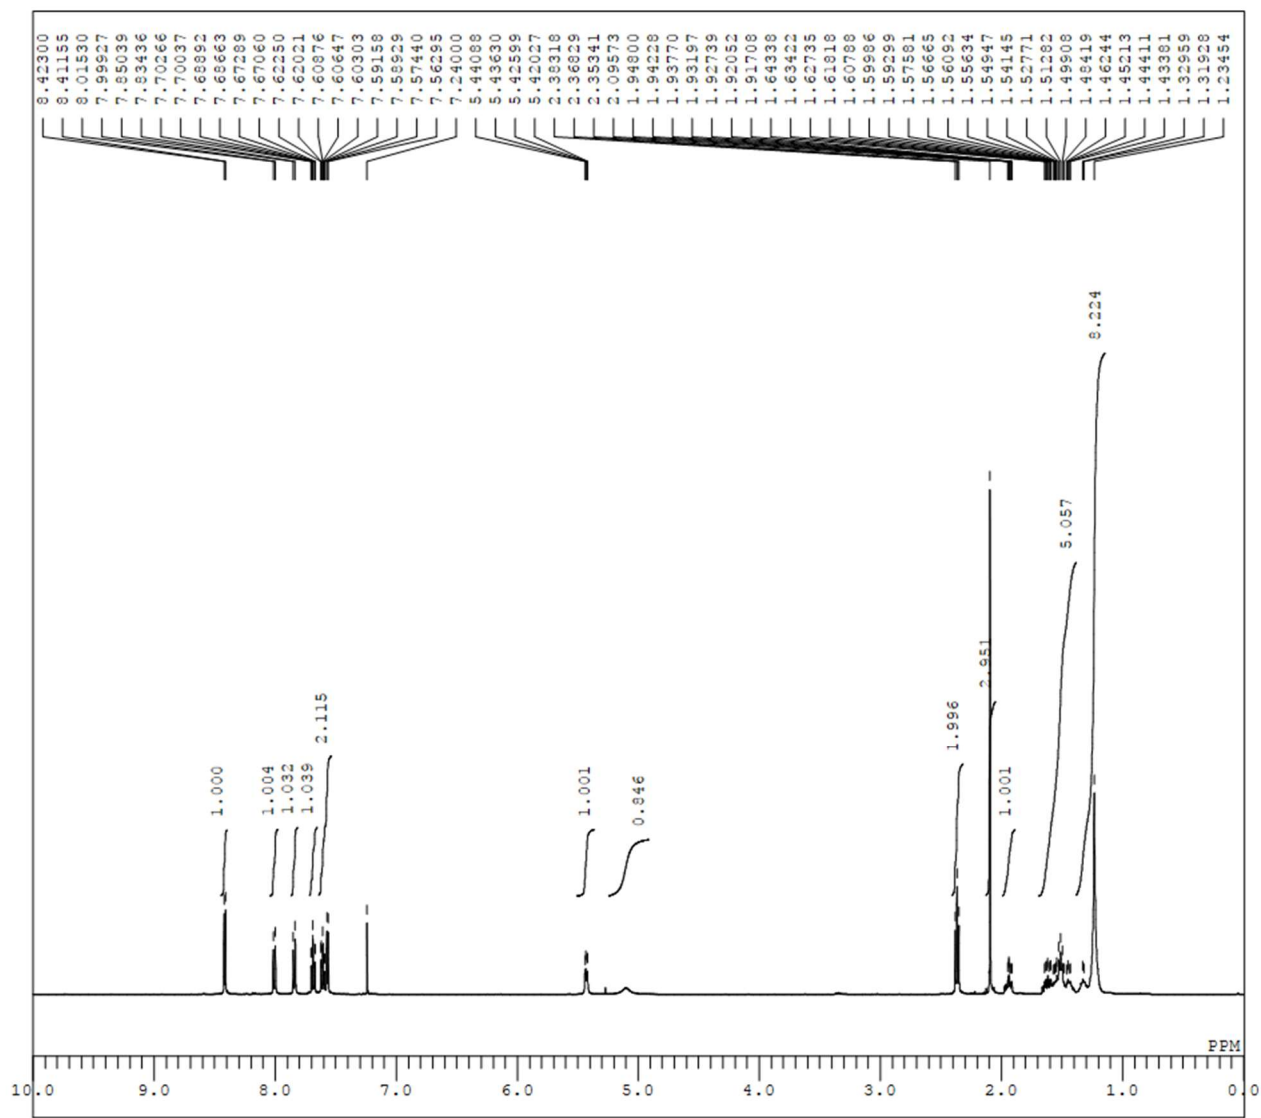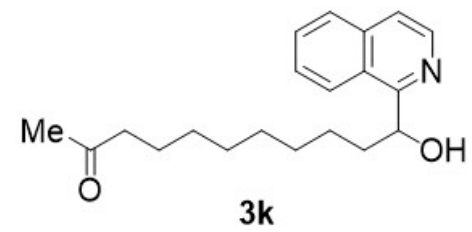



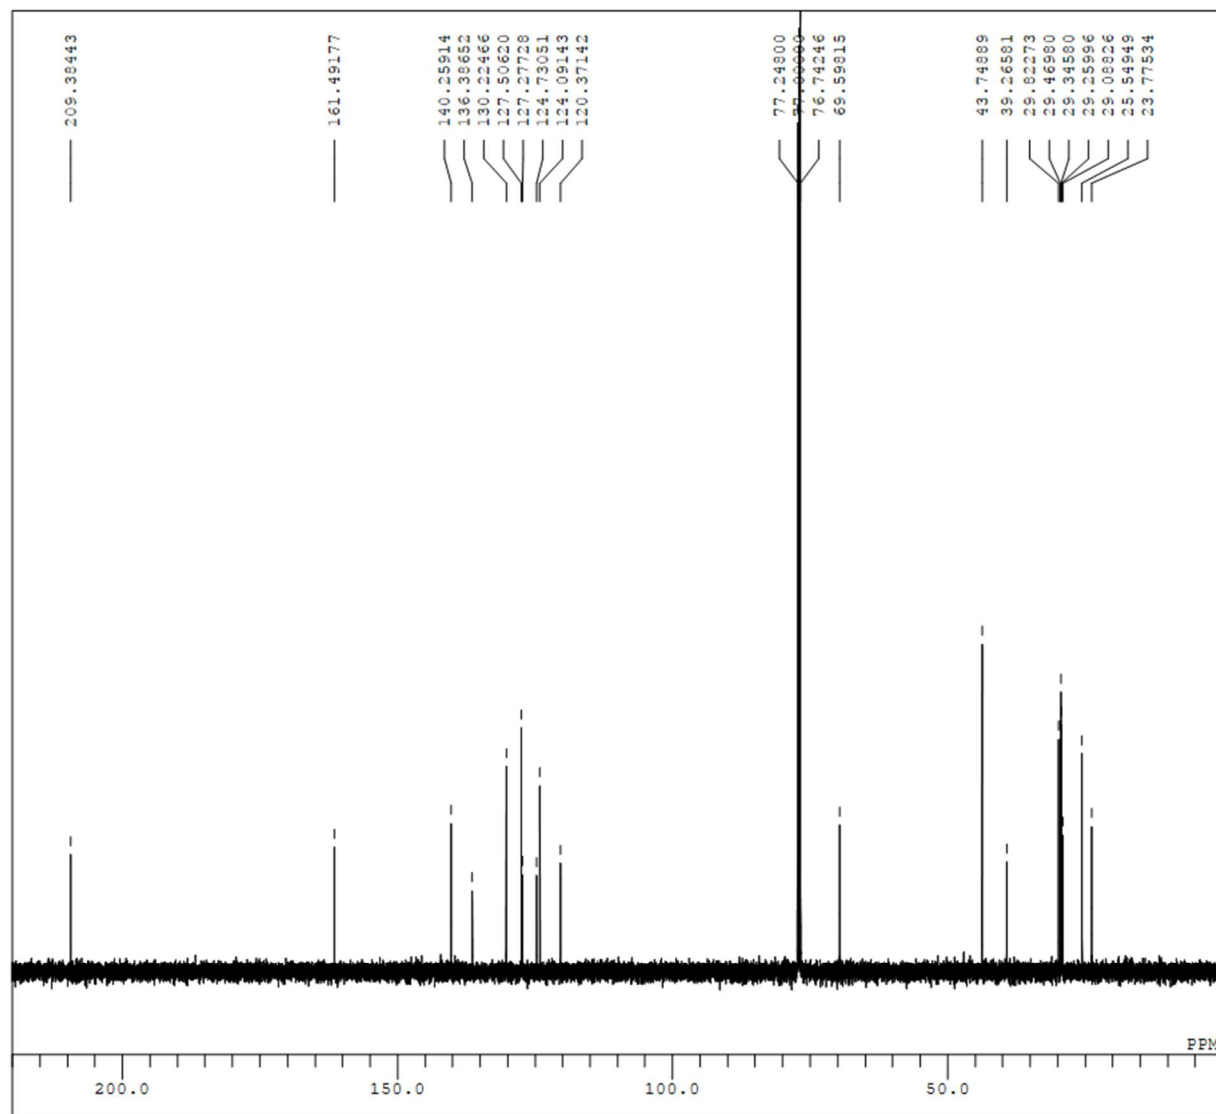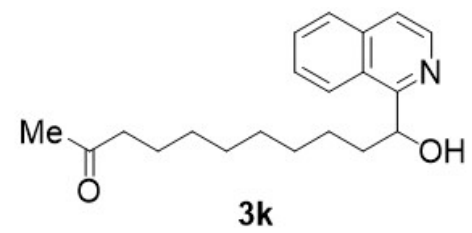

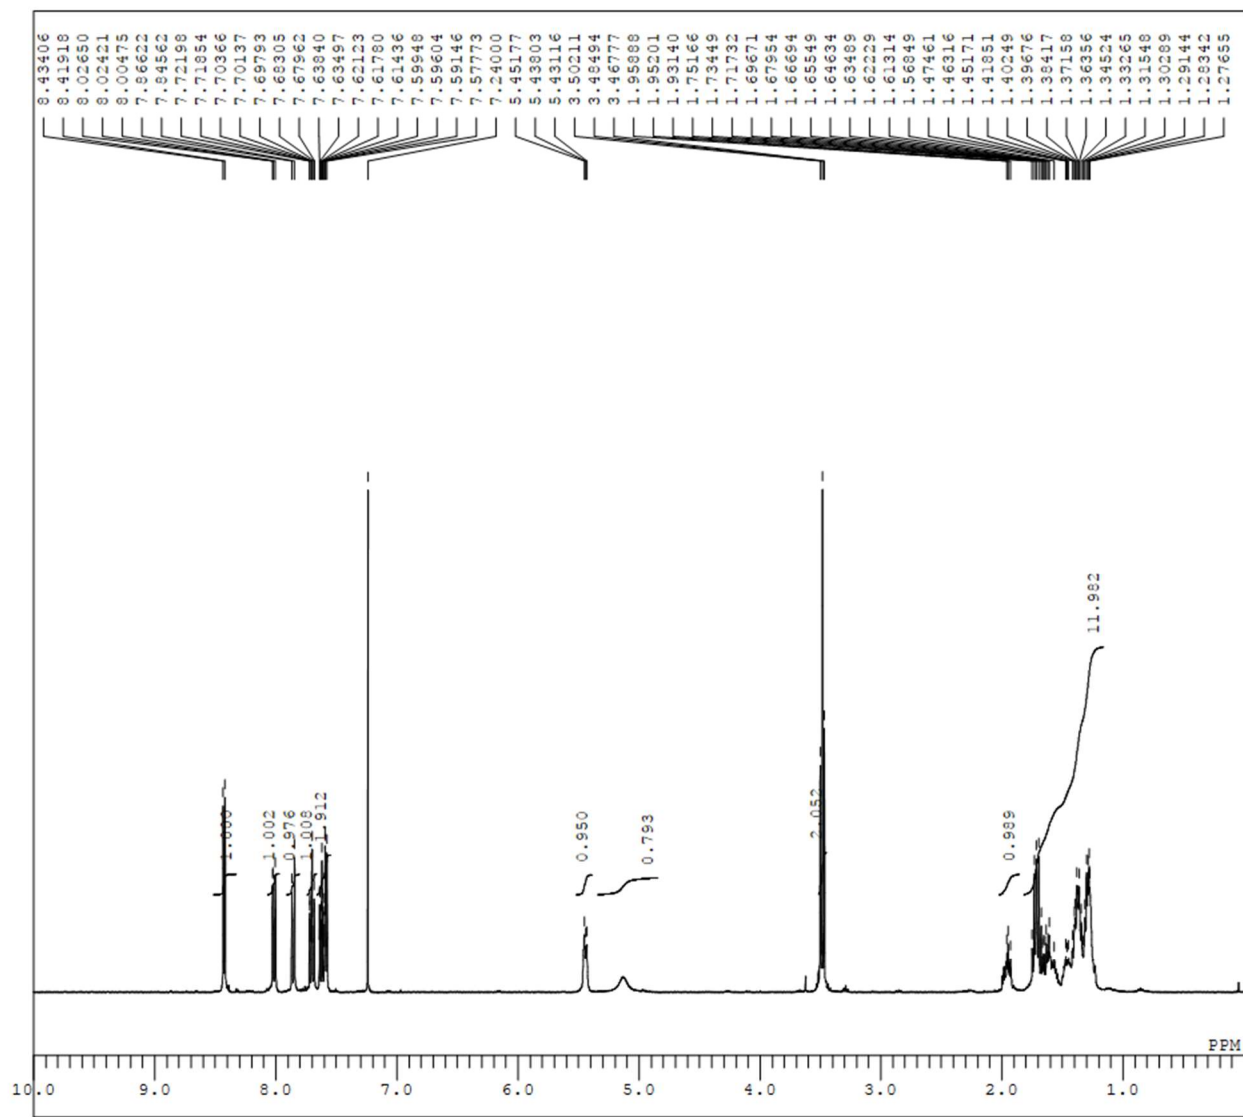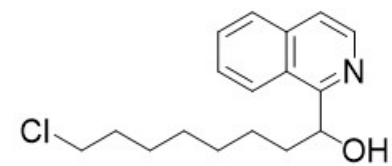

**31**

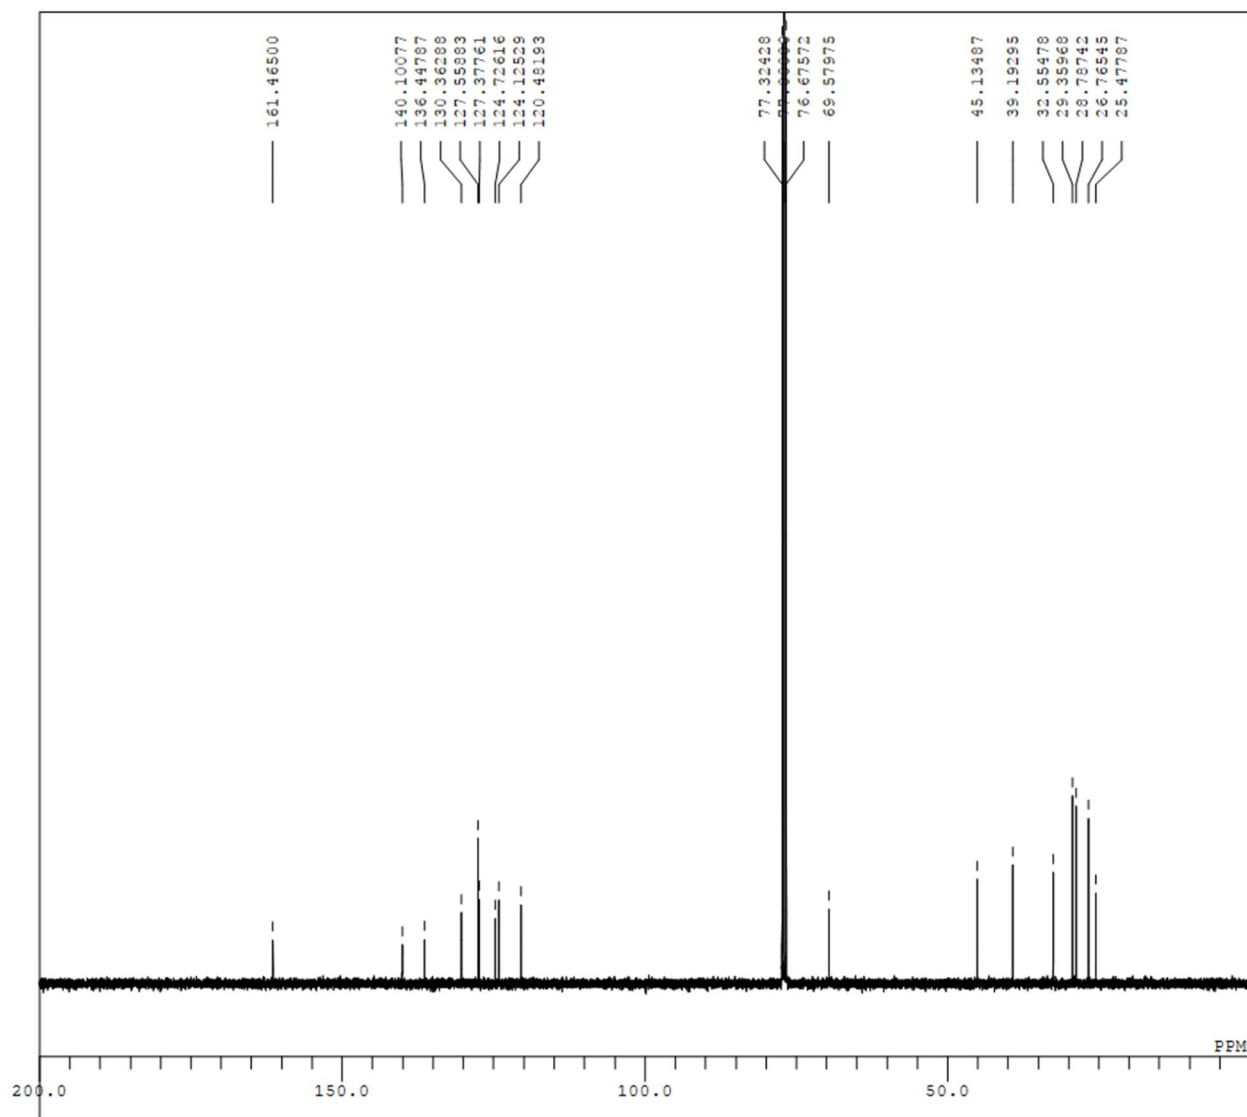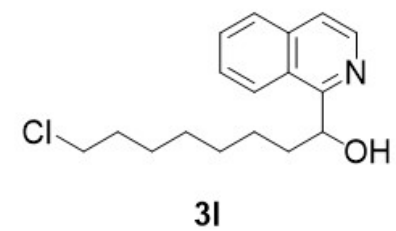

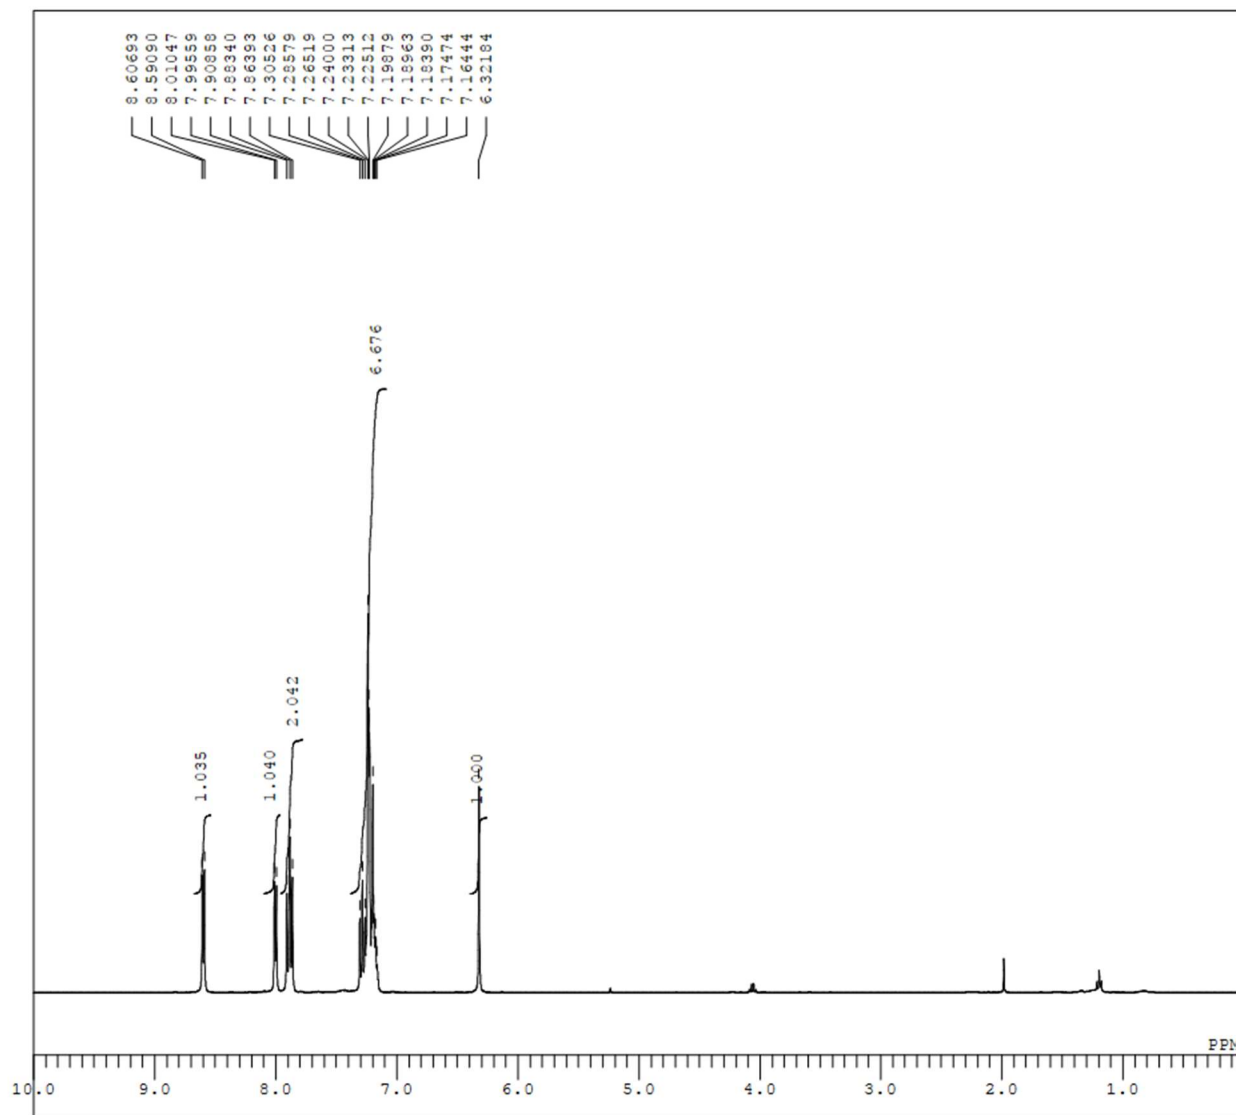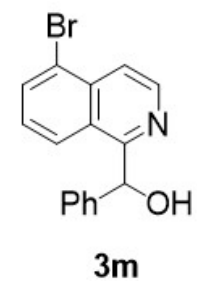

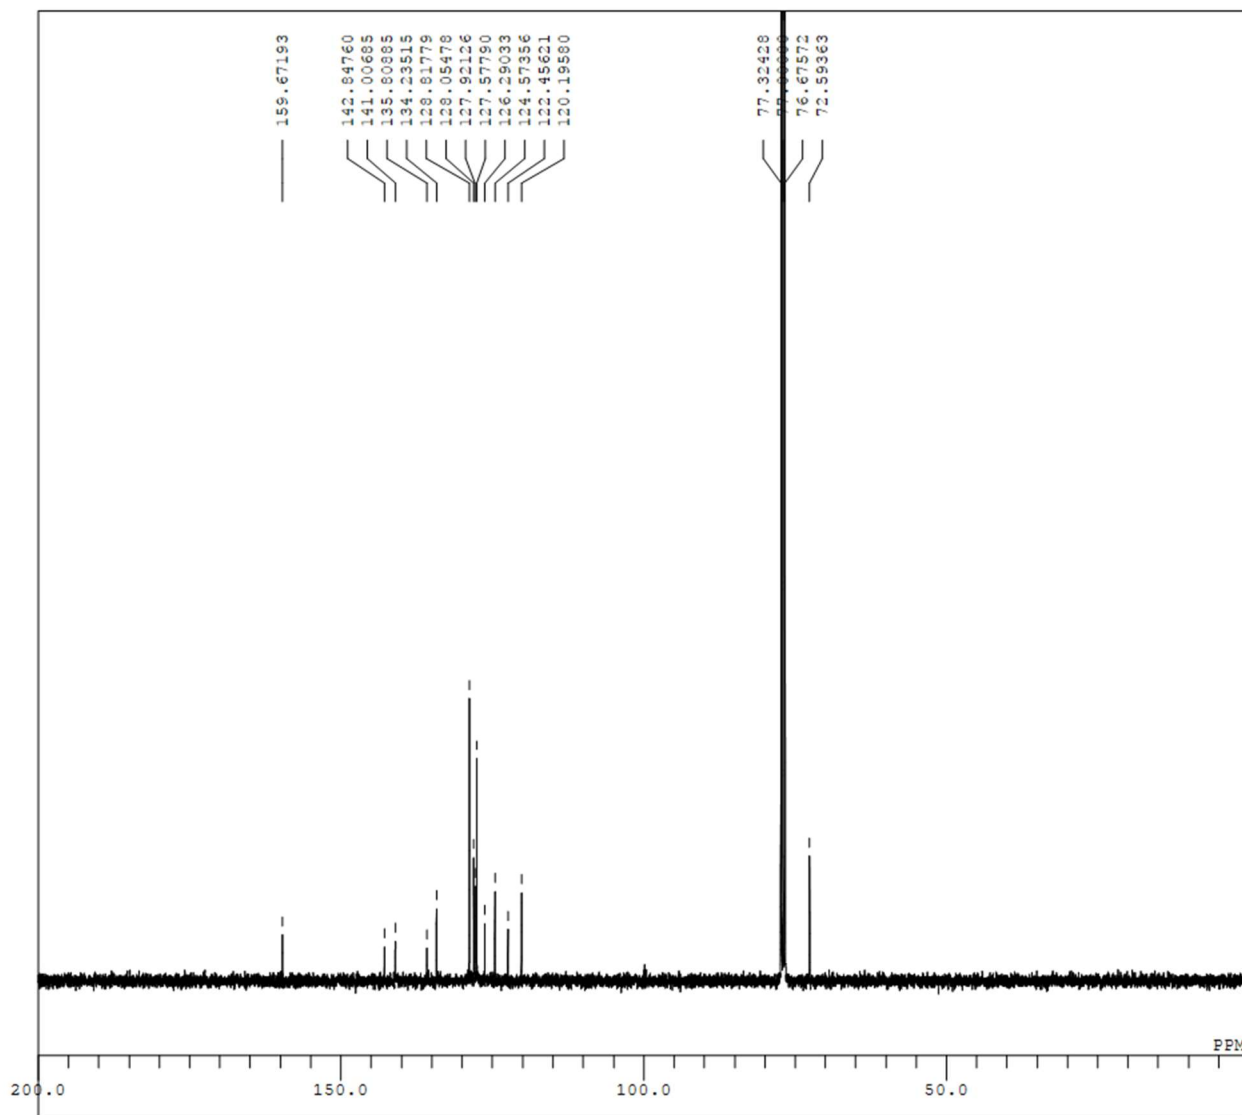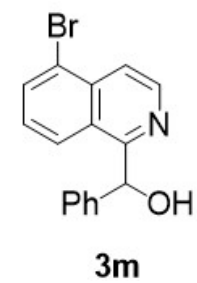

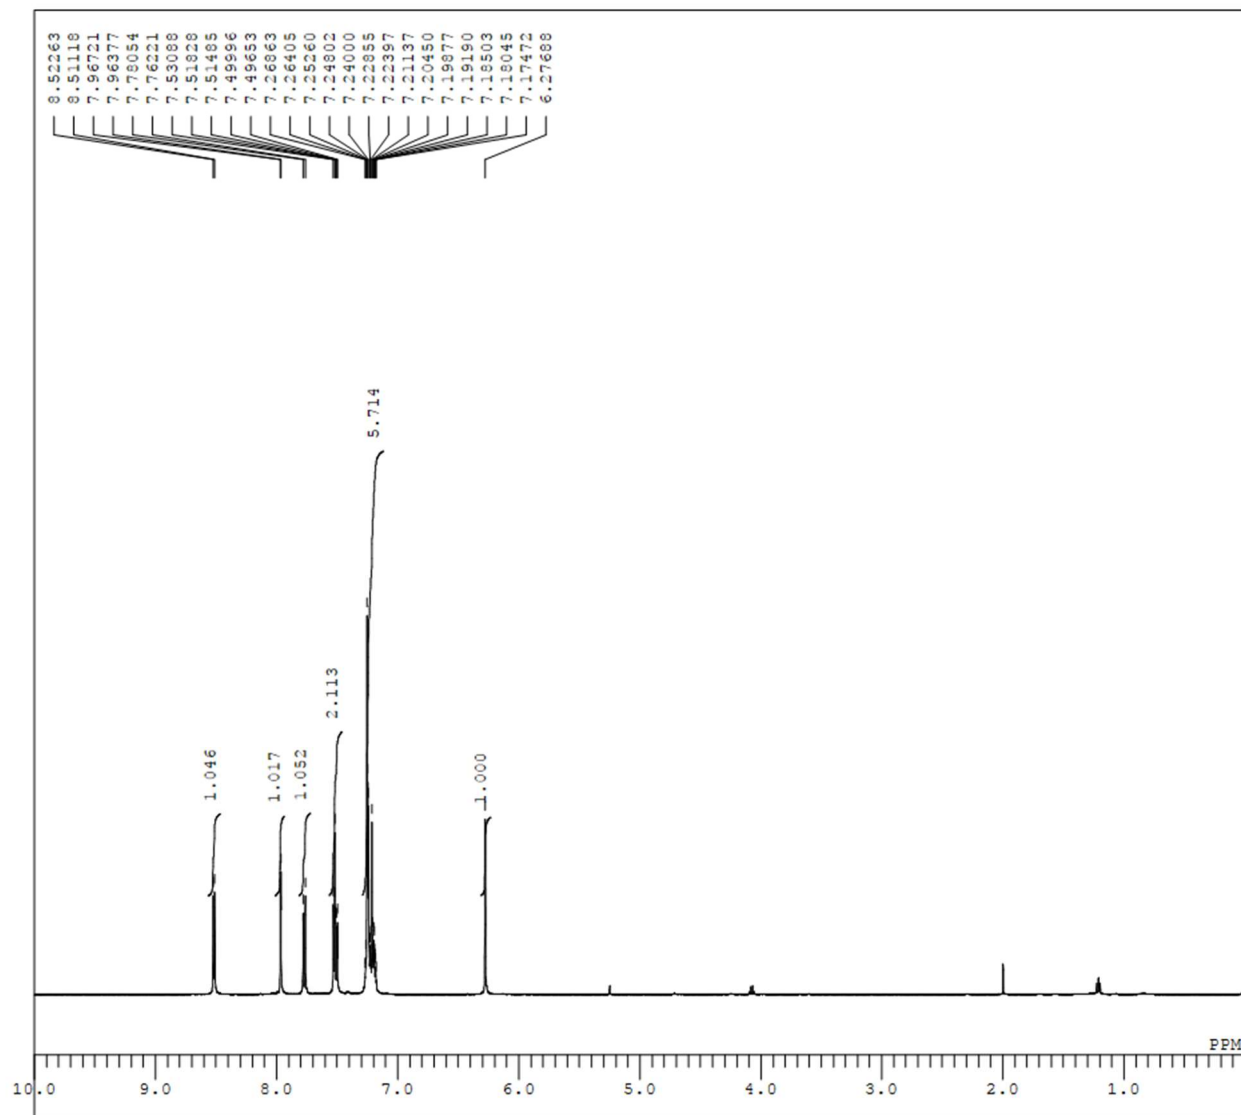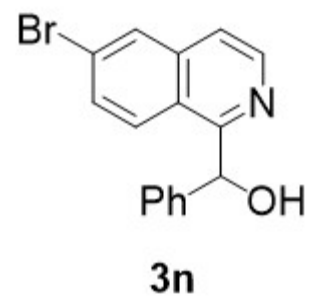

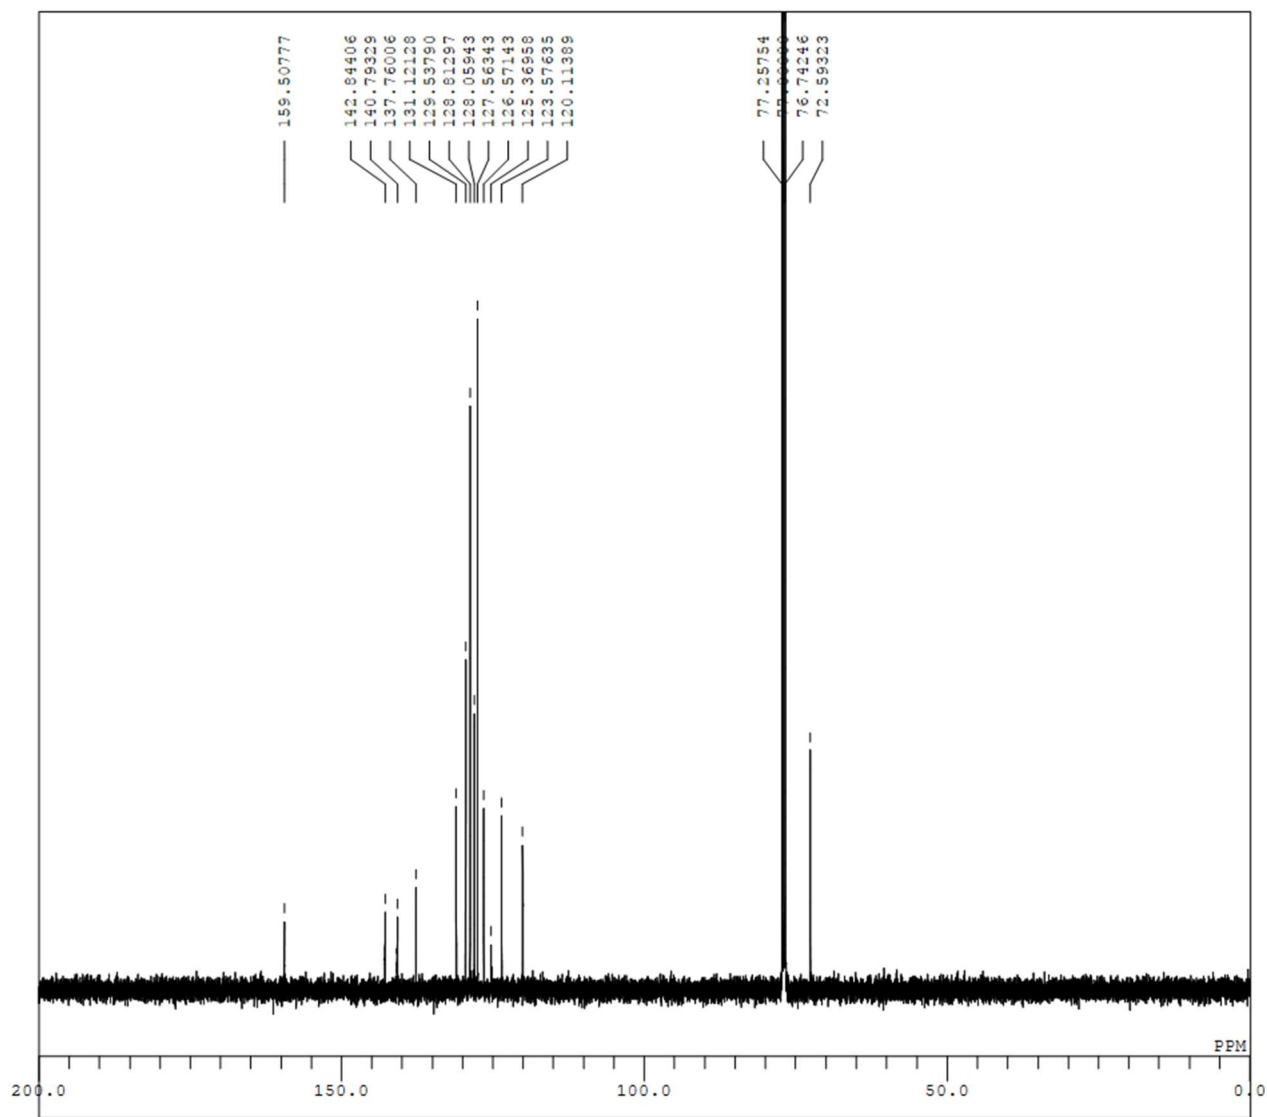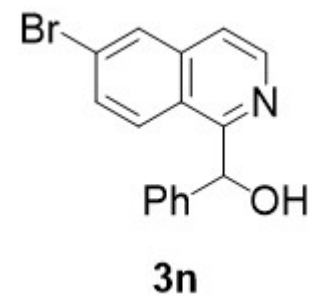

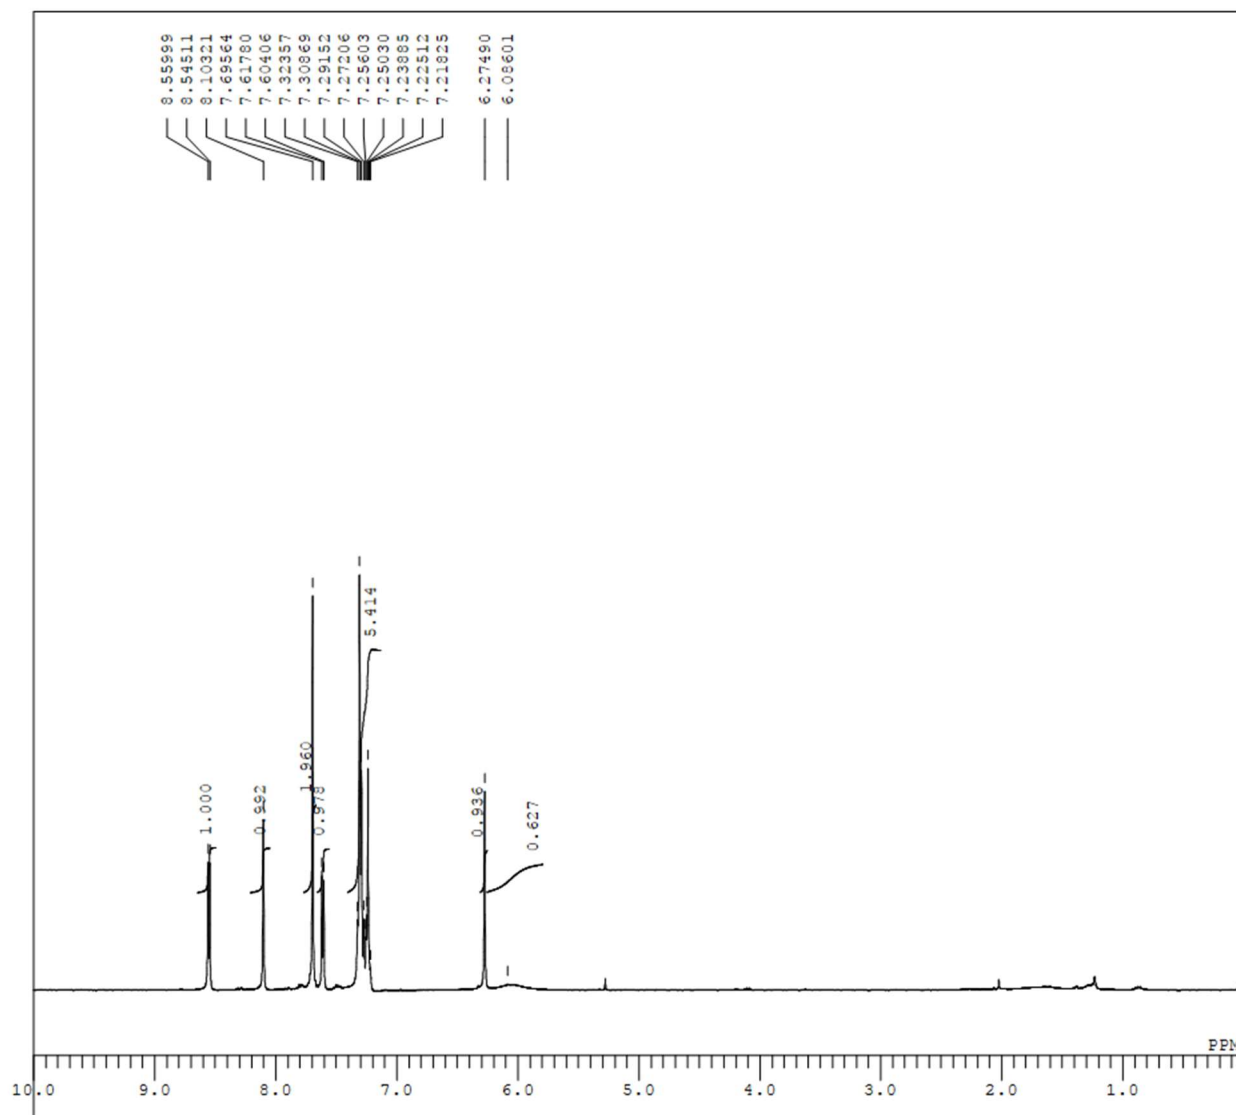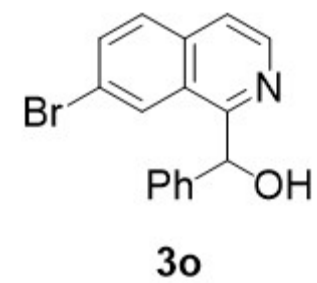



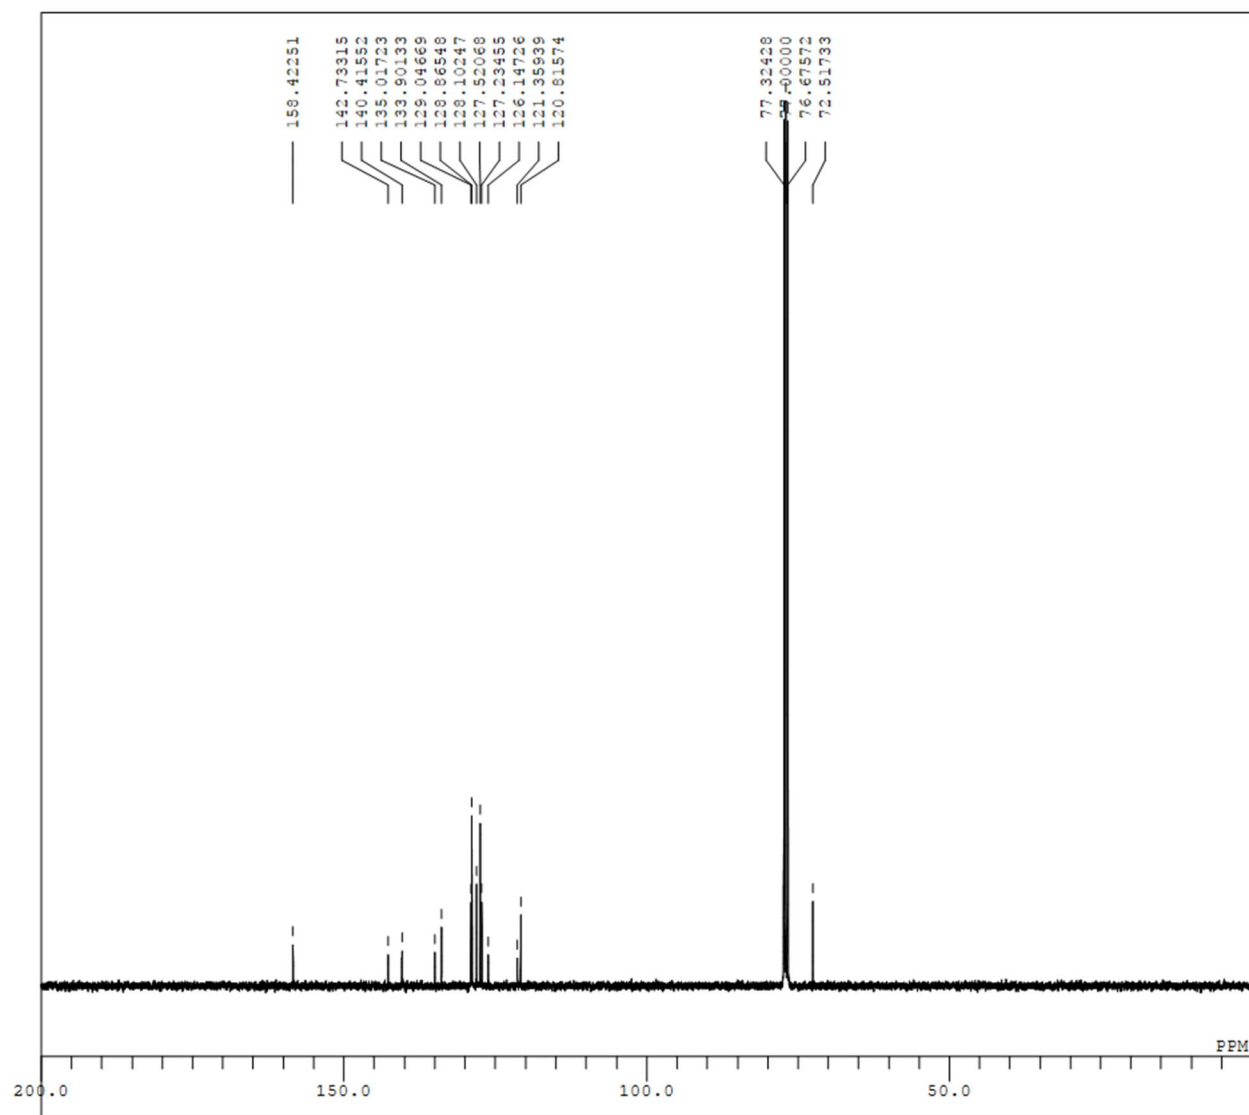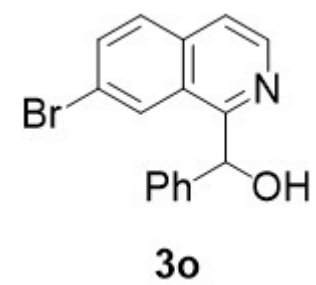

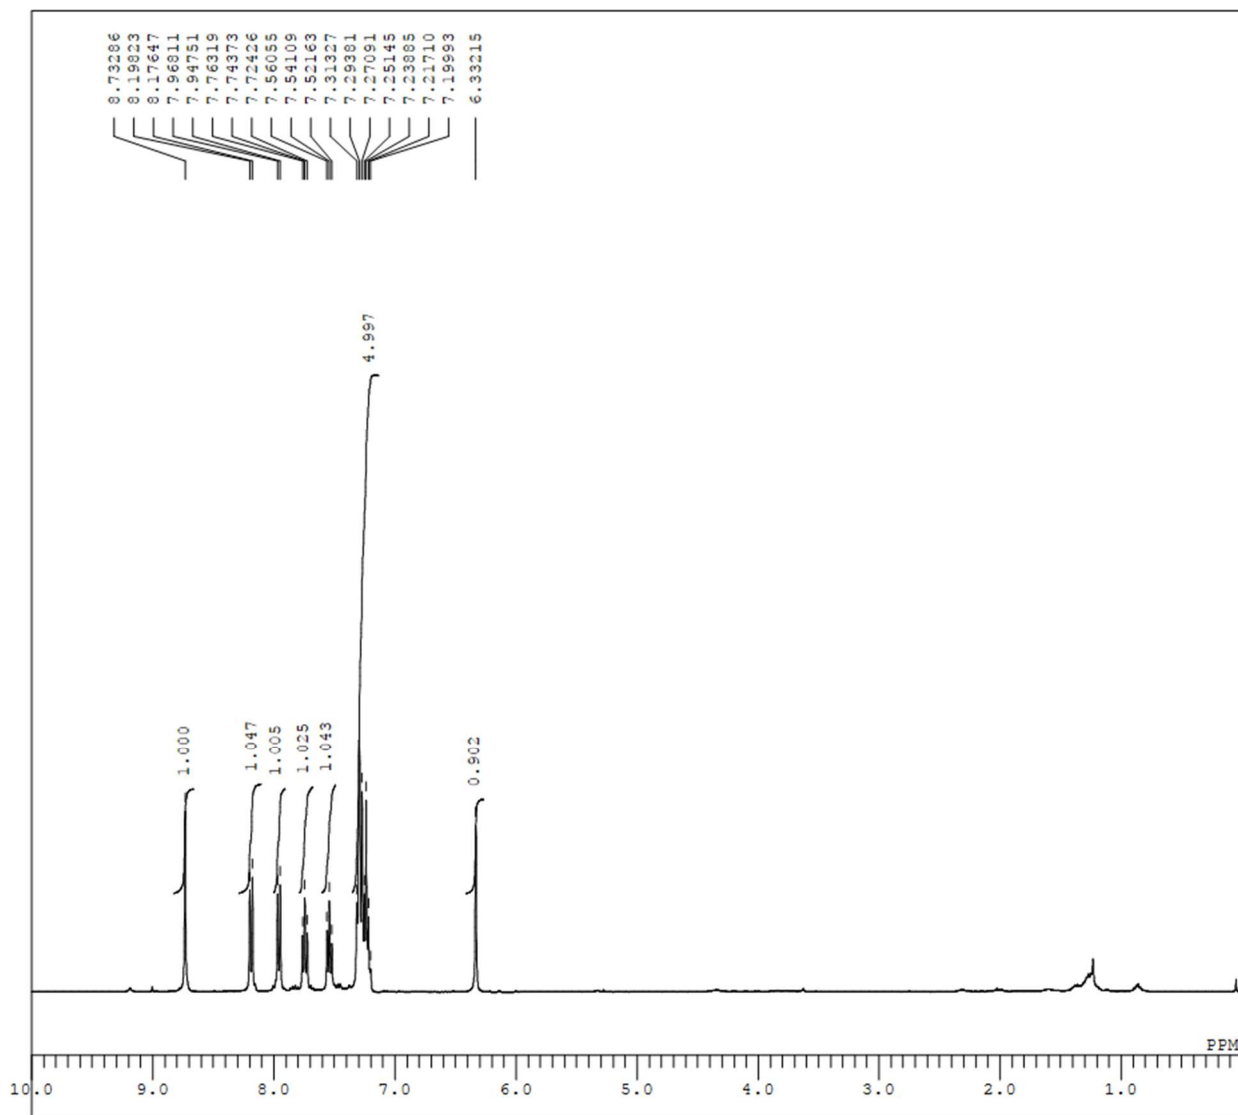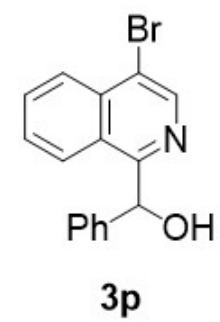

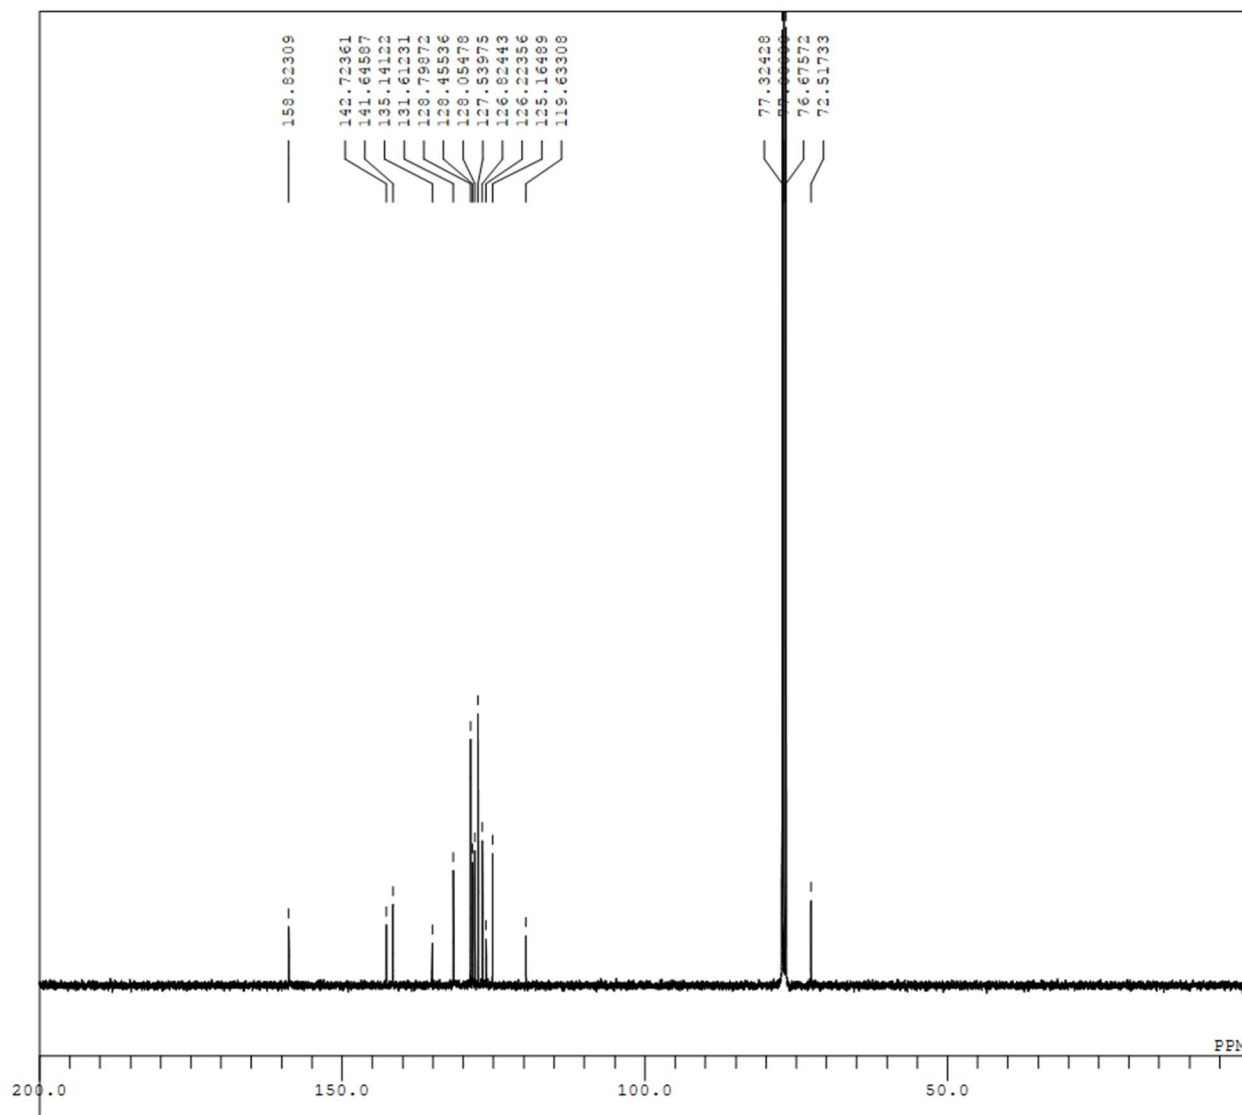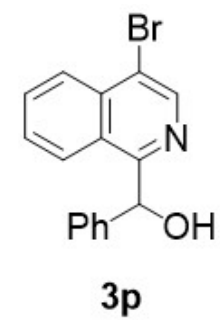

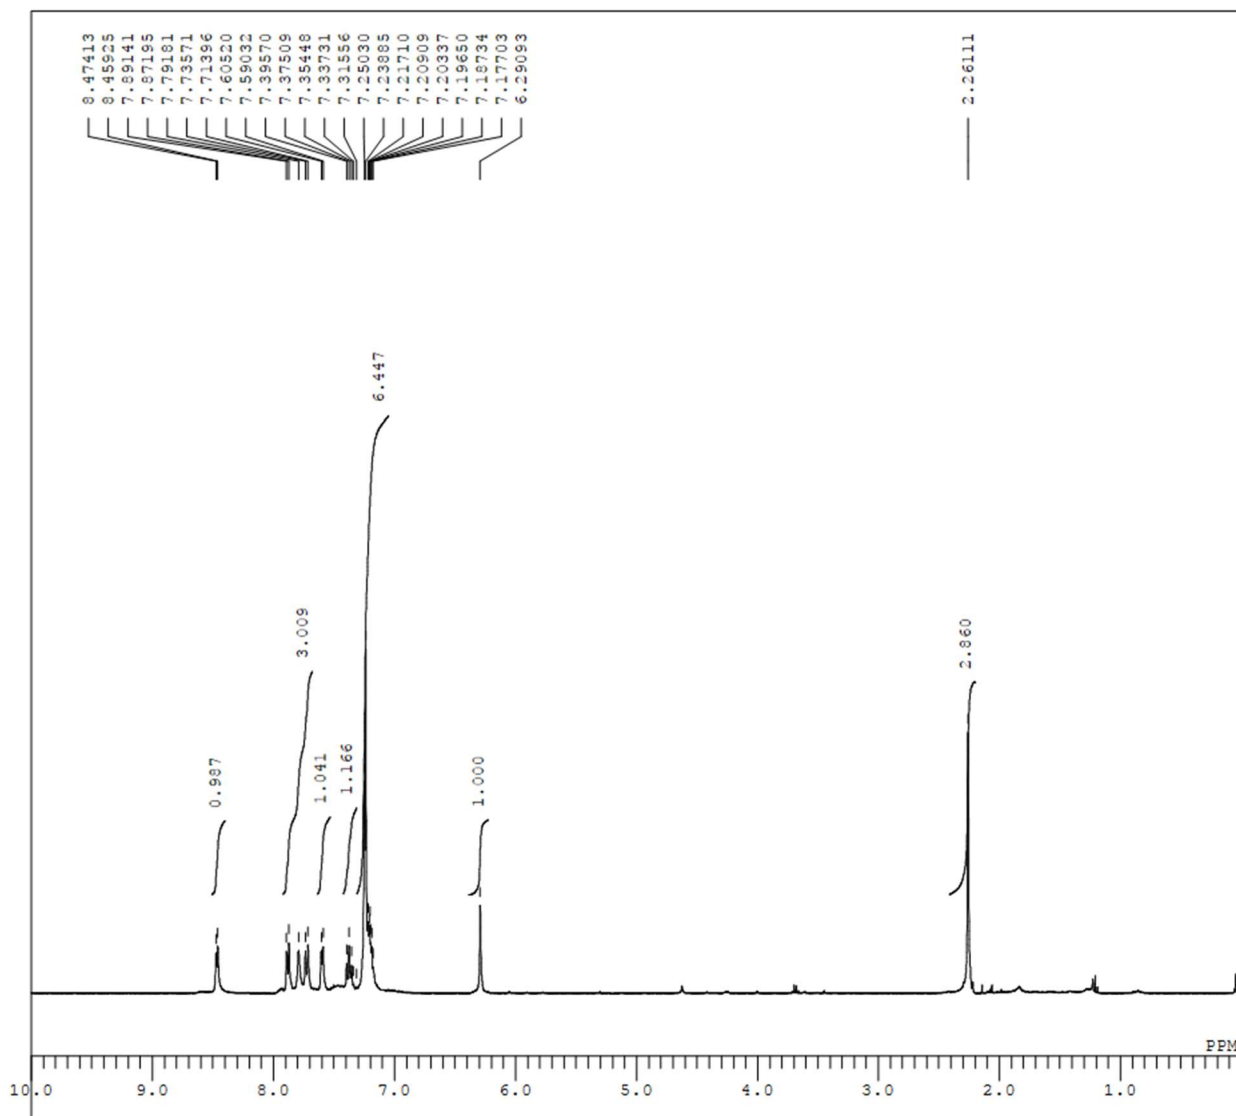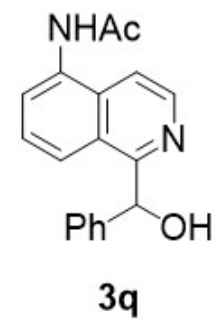

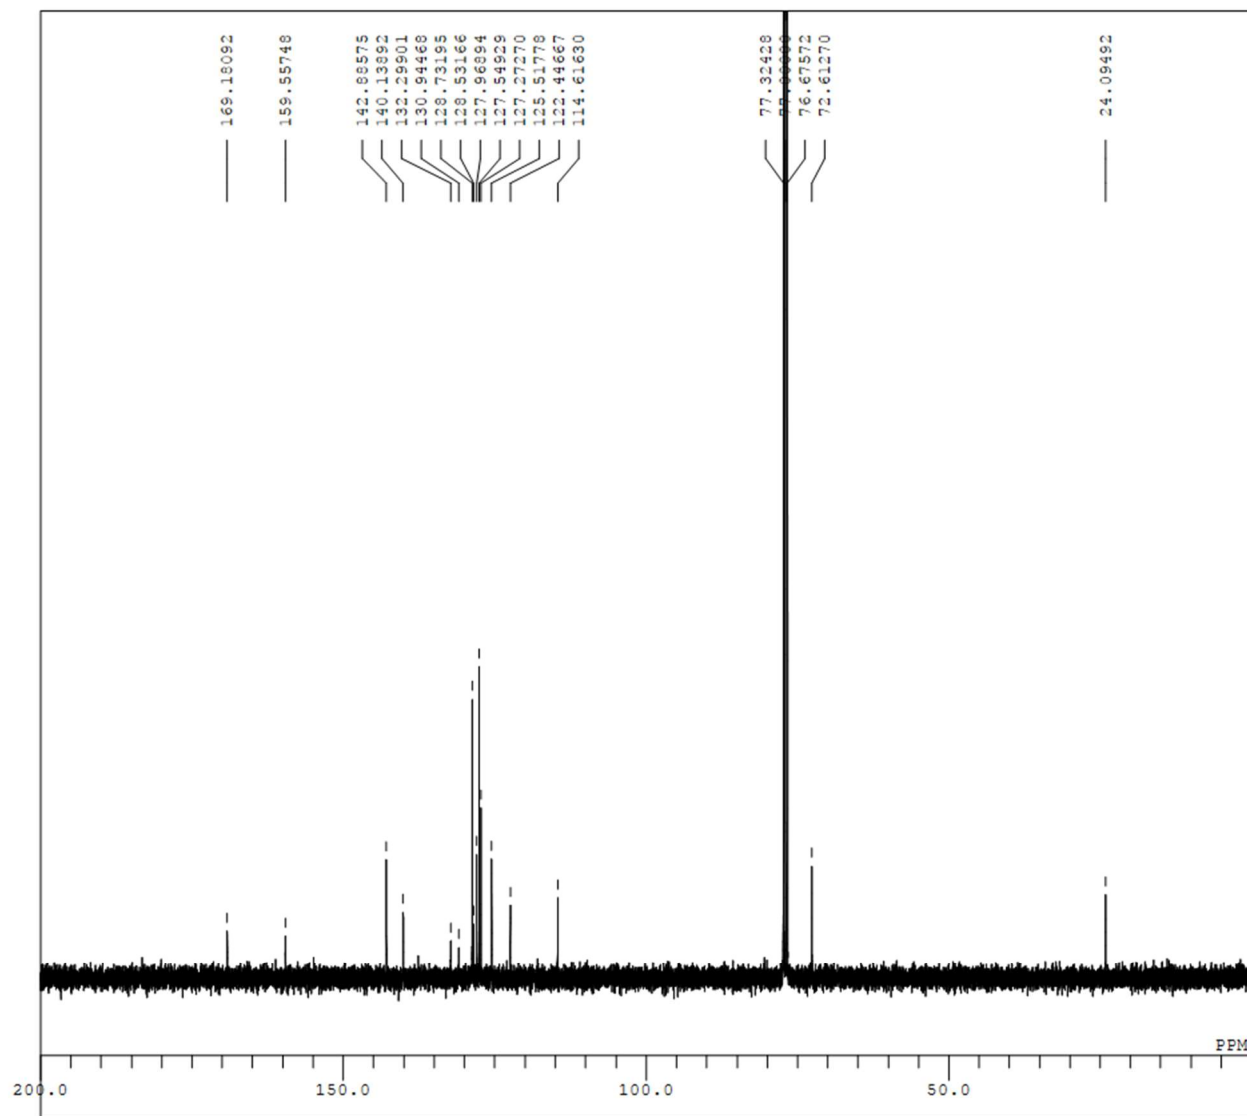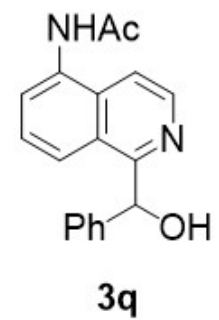

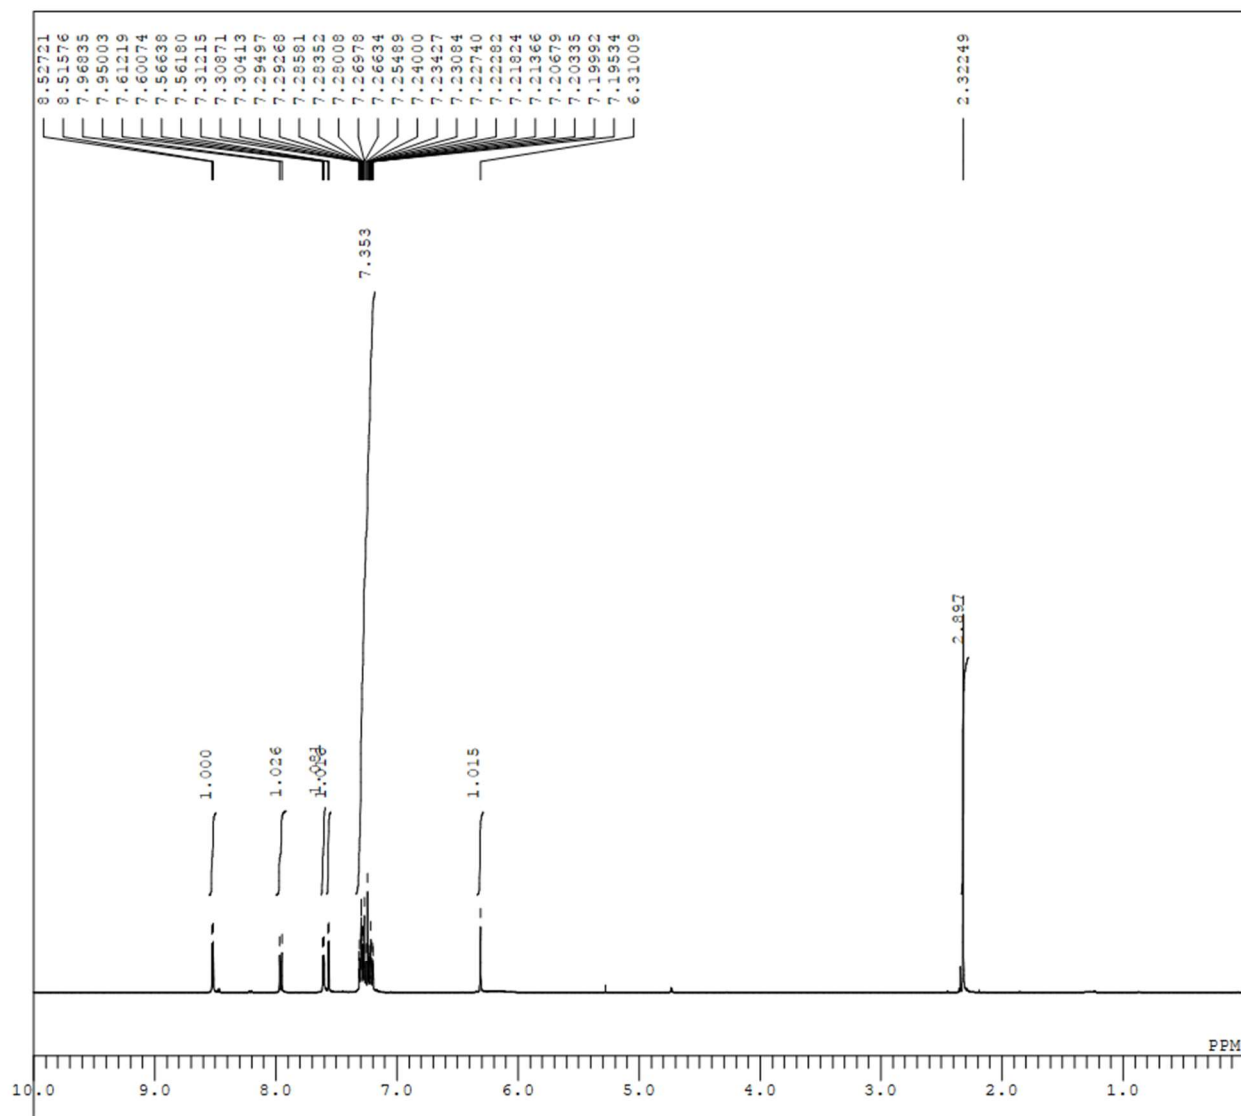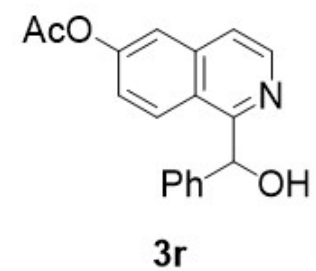

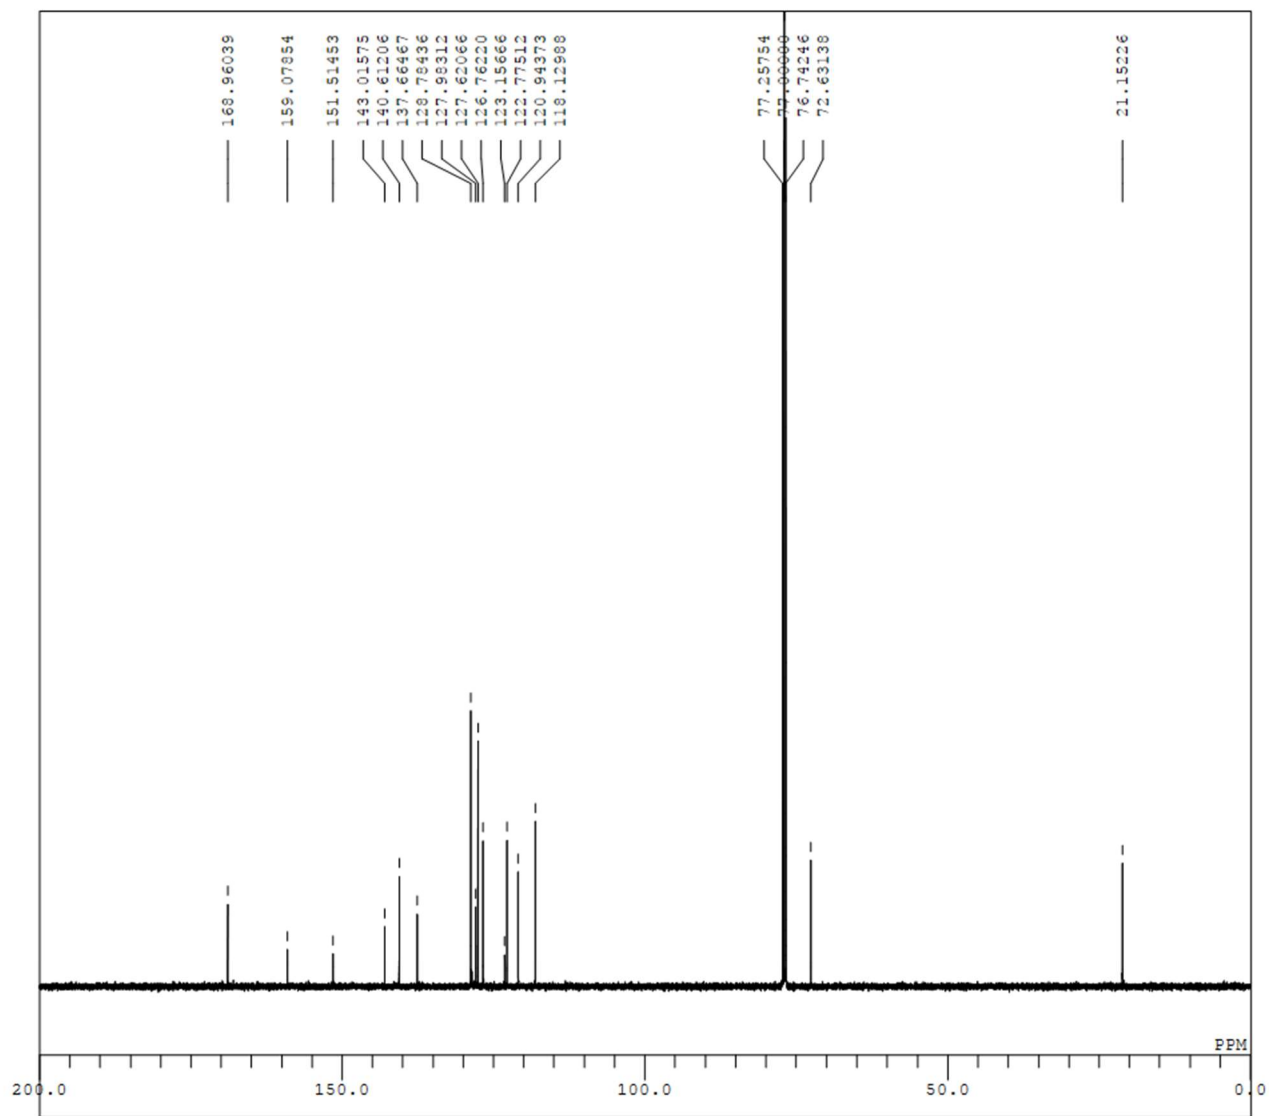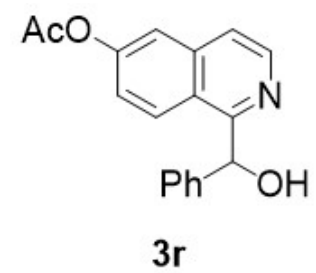

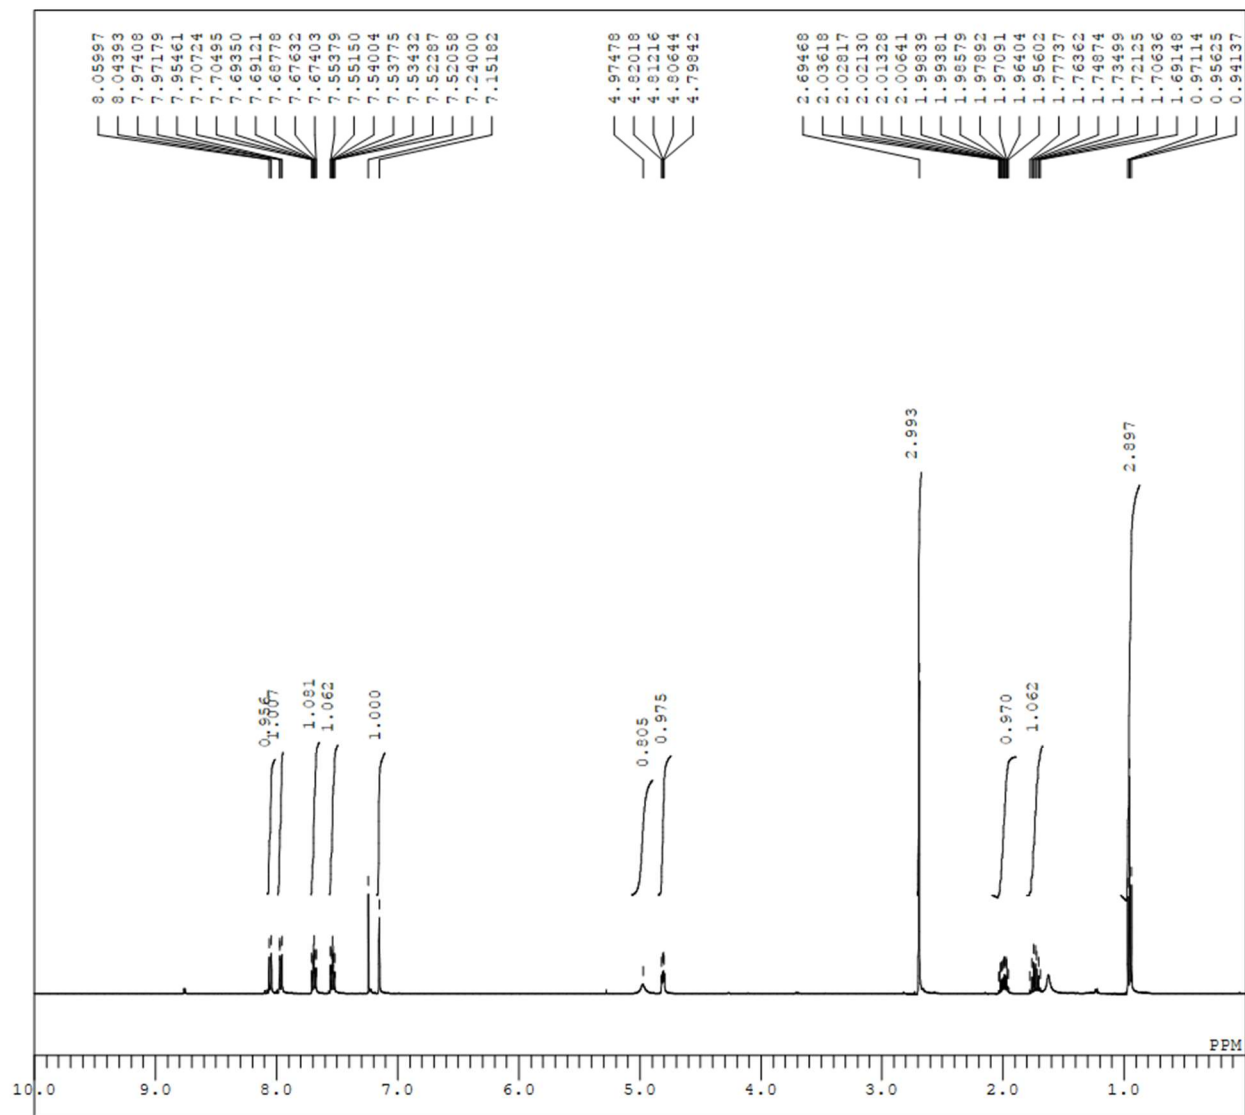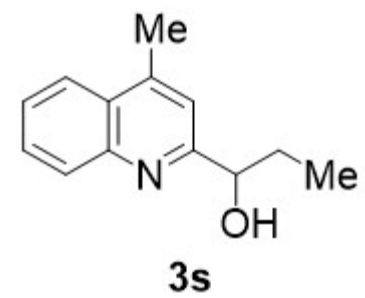



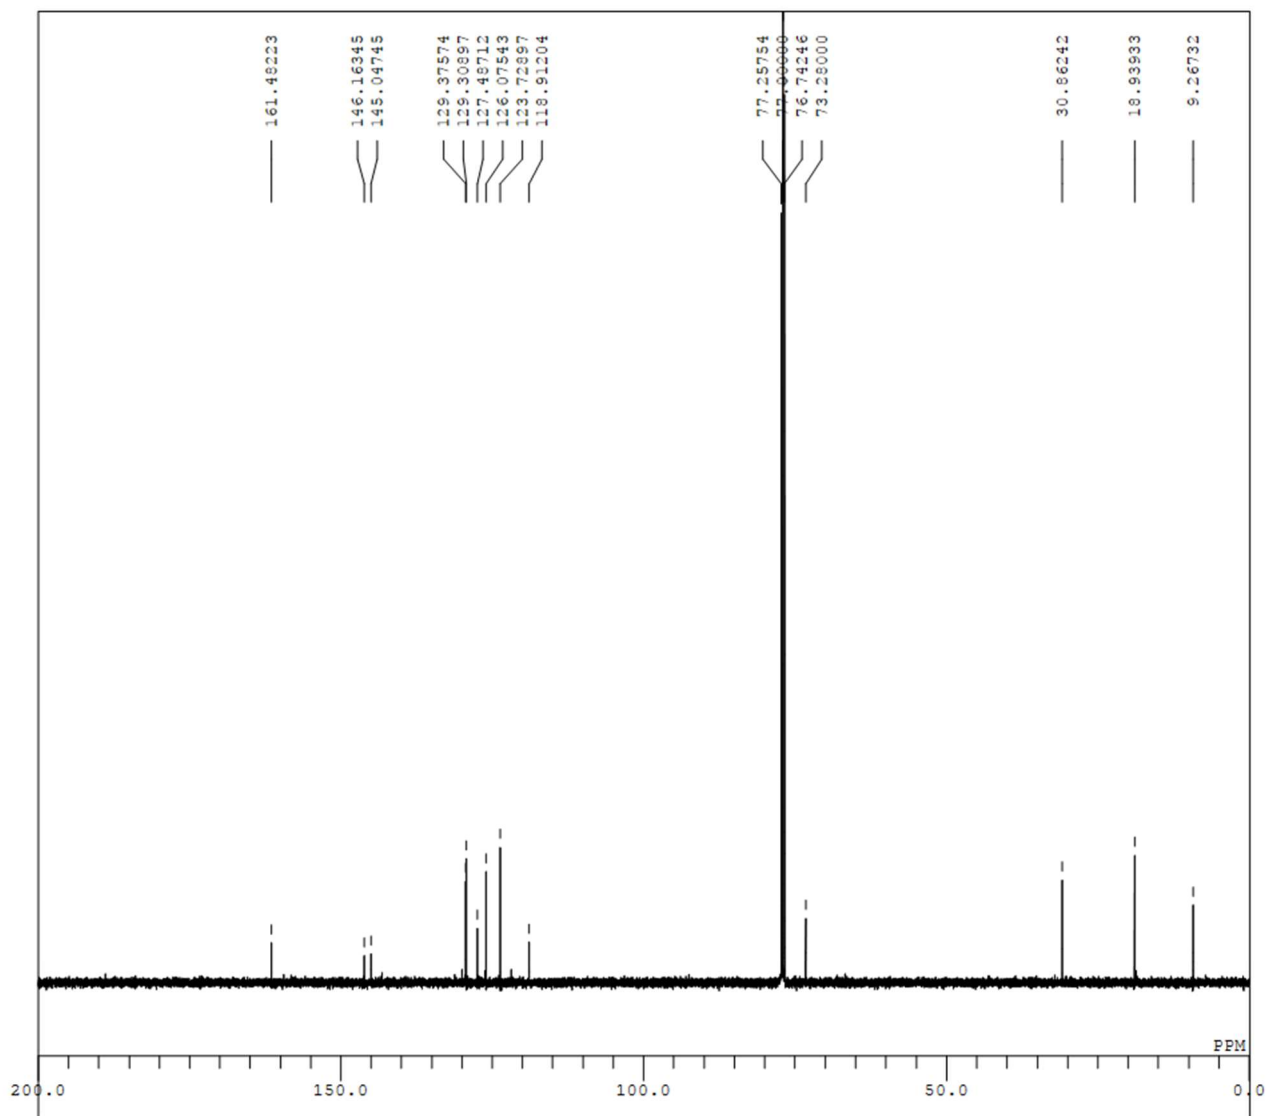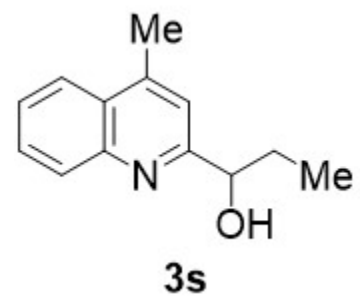

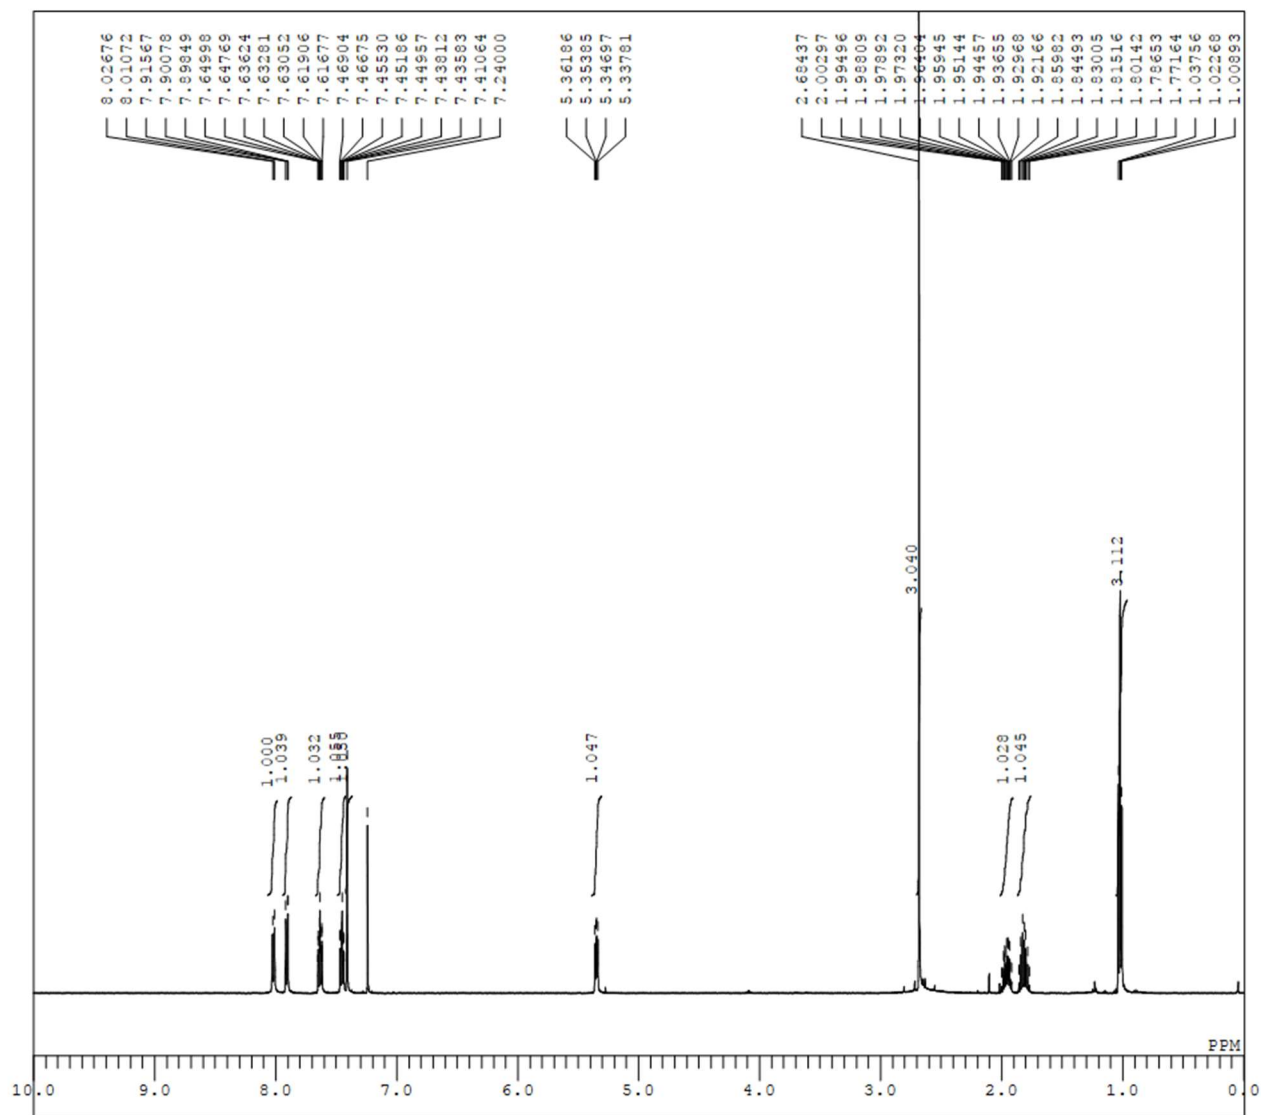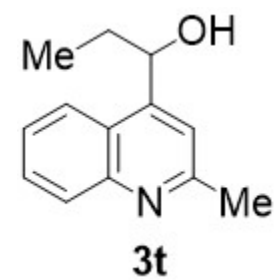

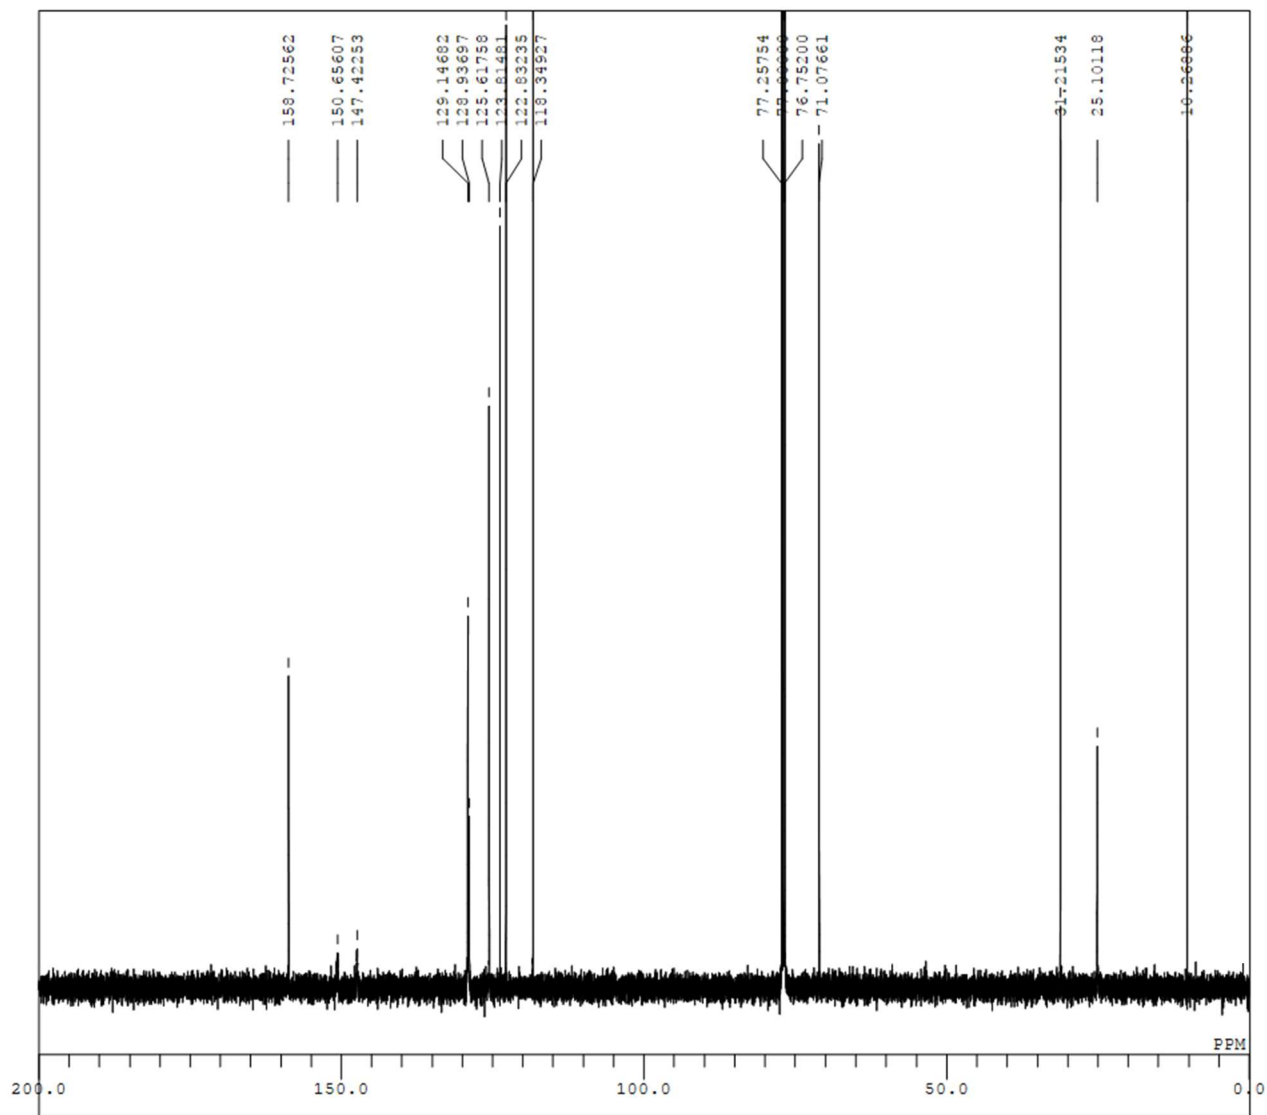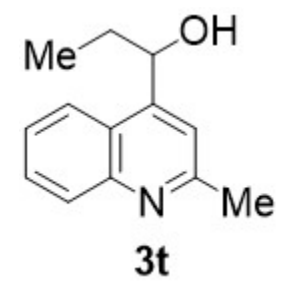

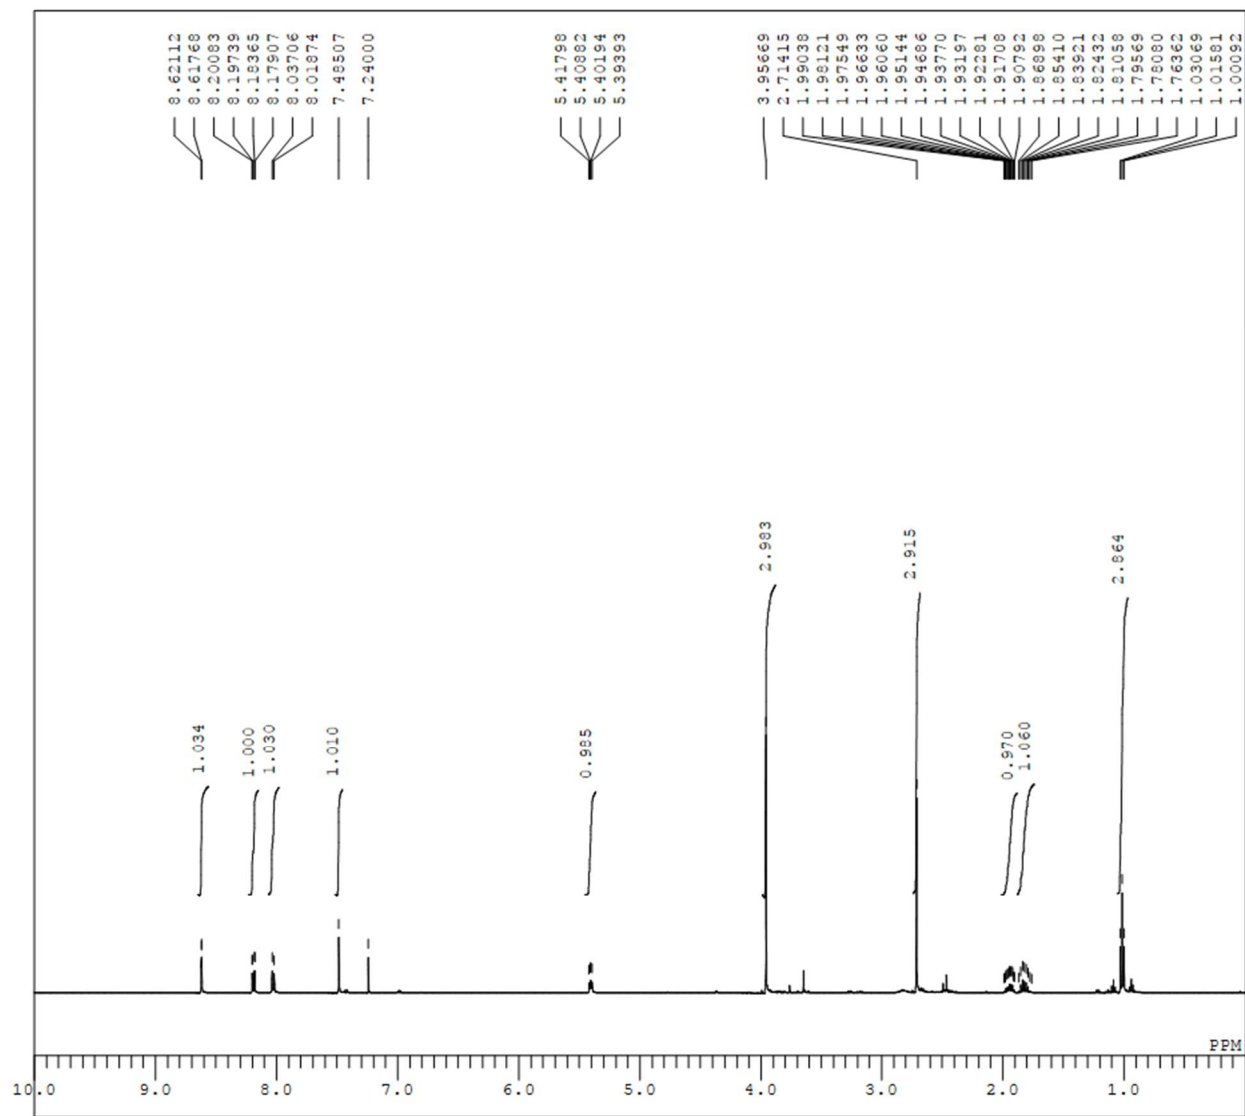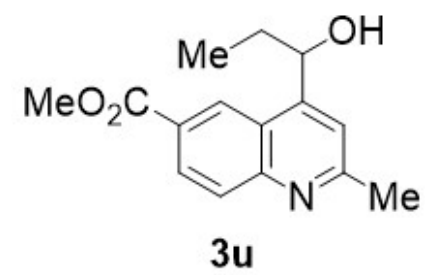

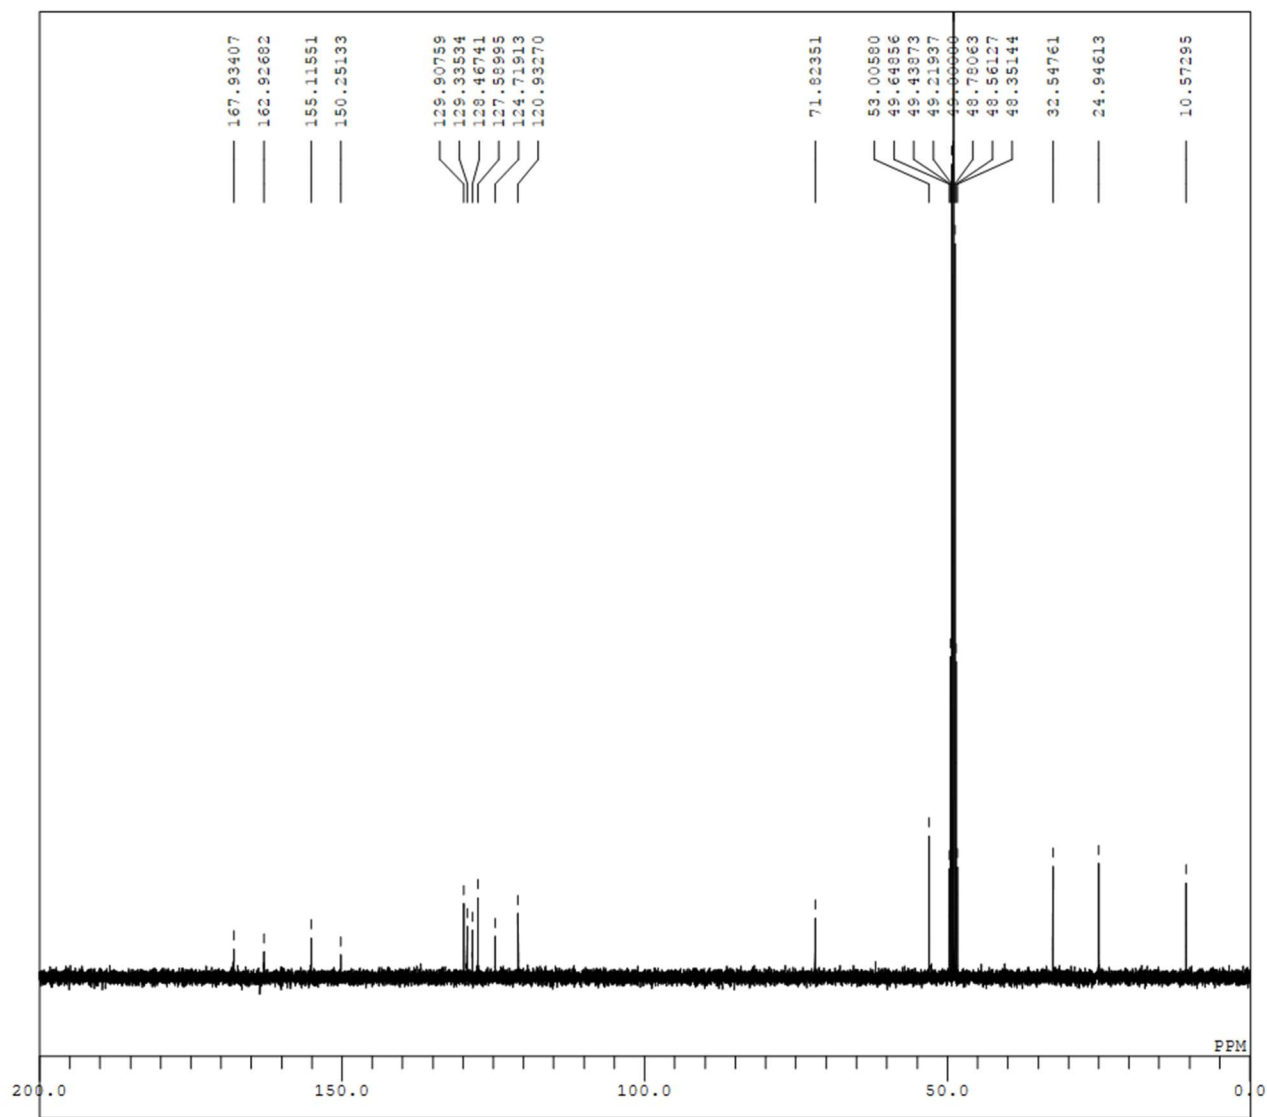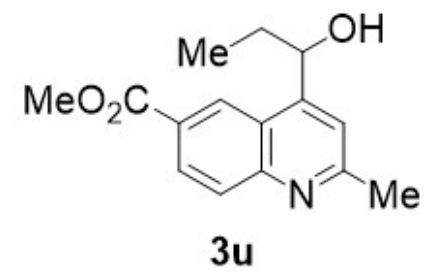

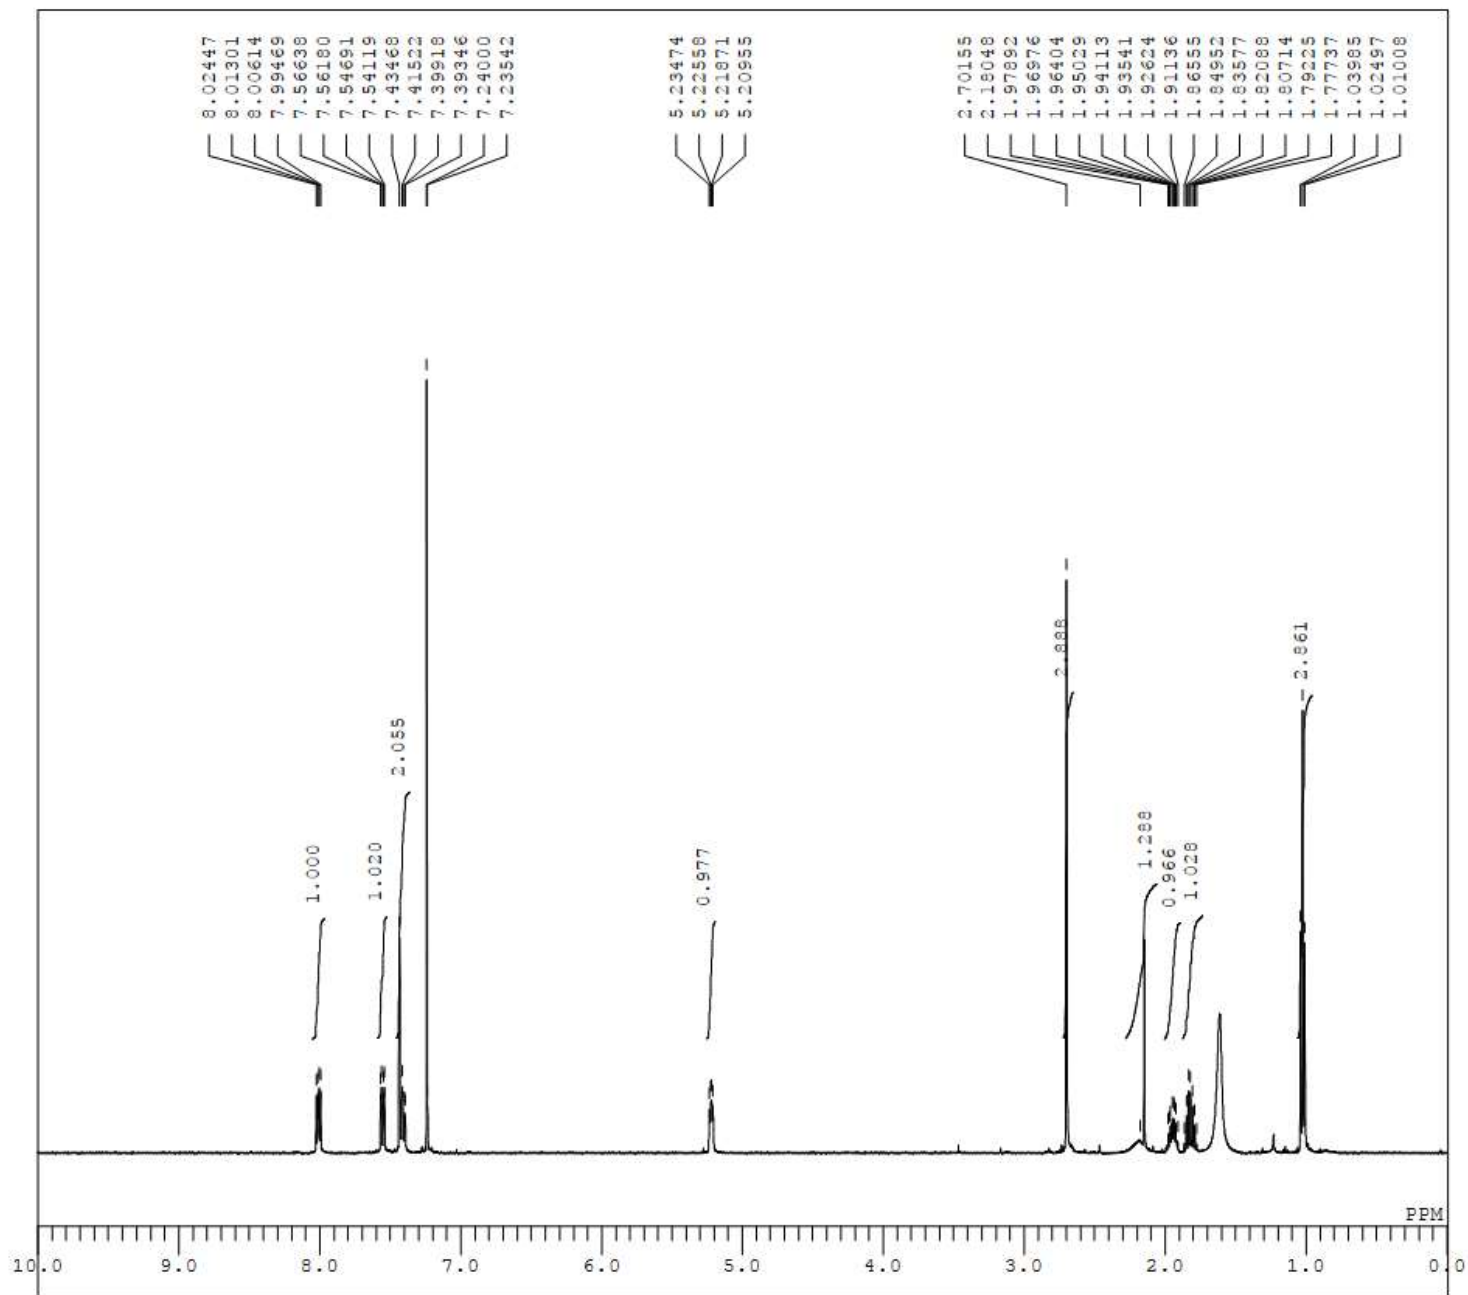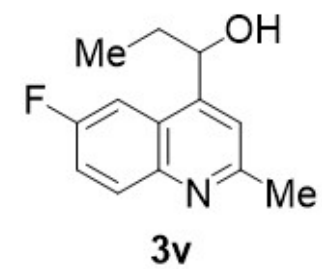

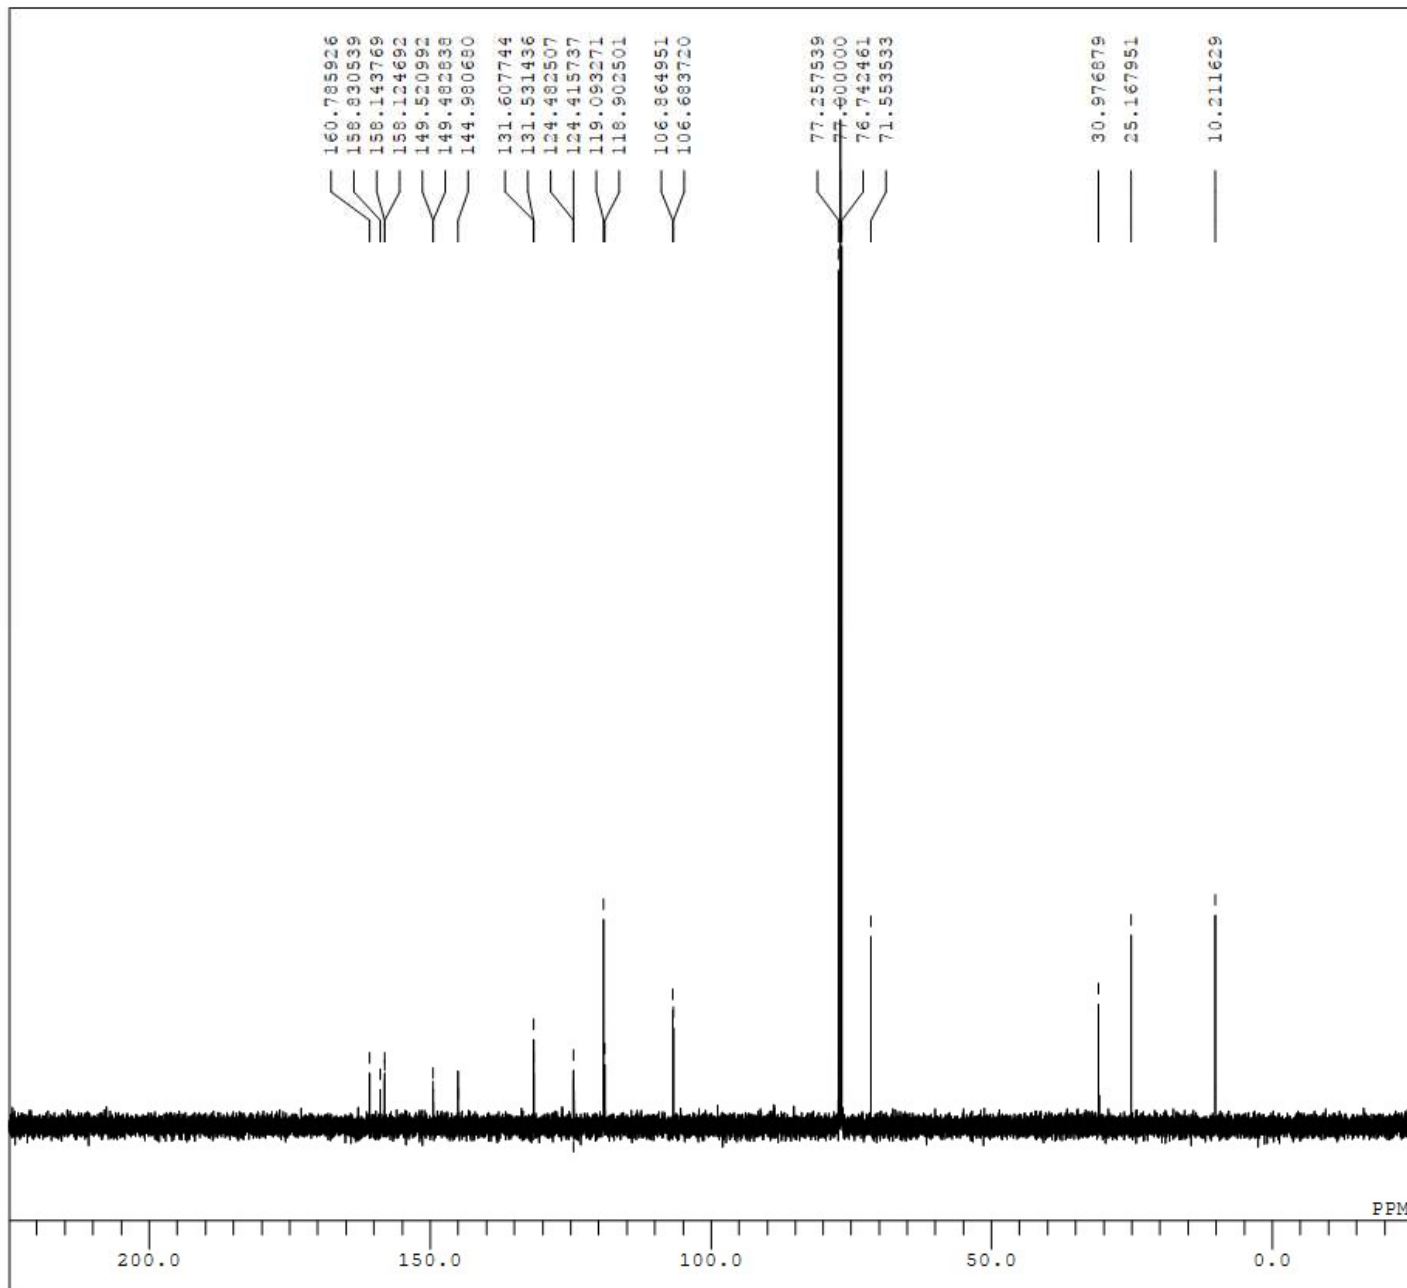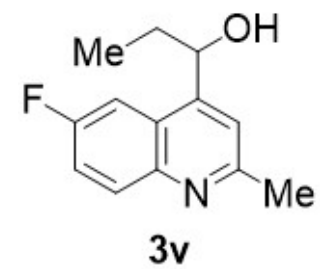

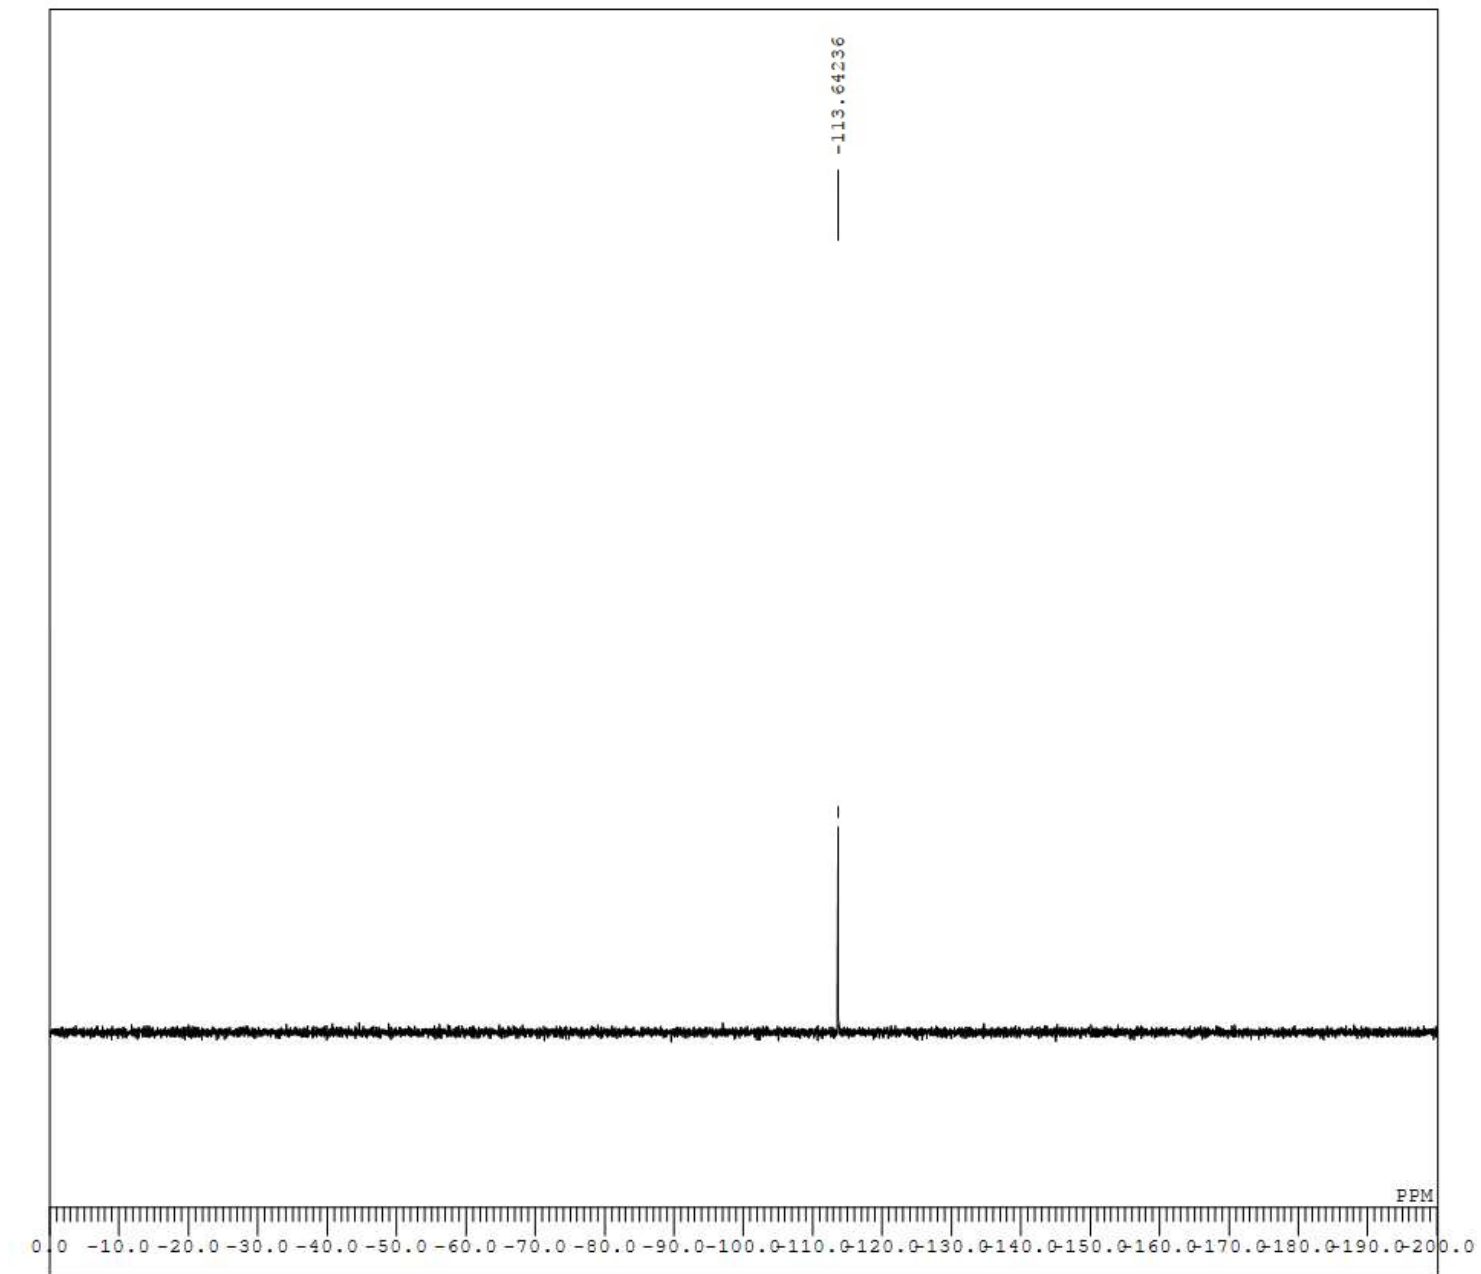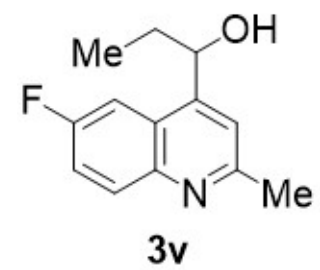



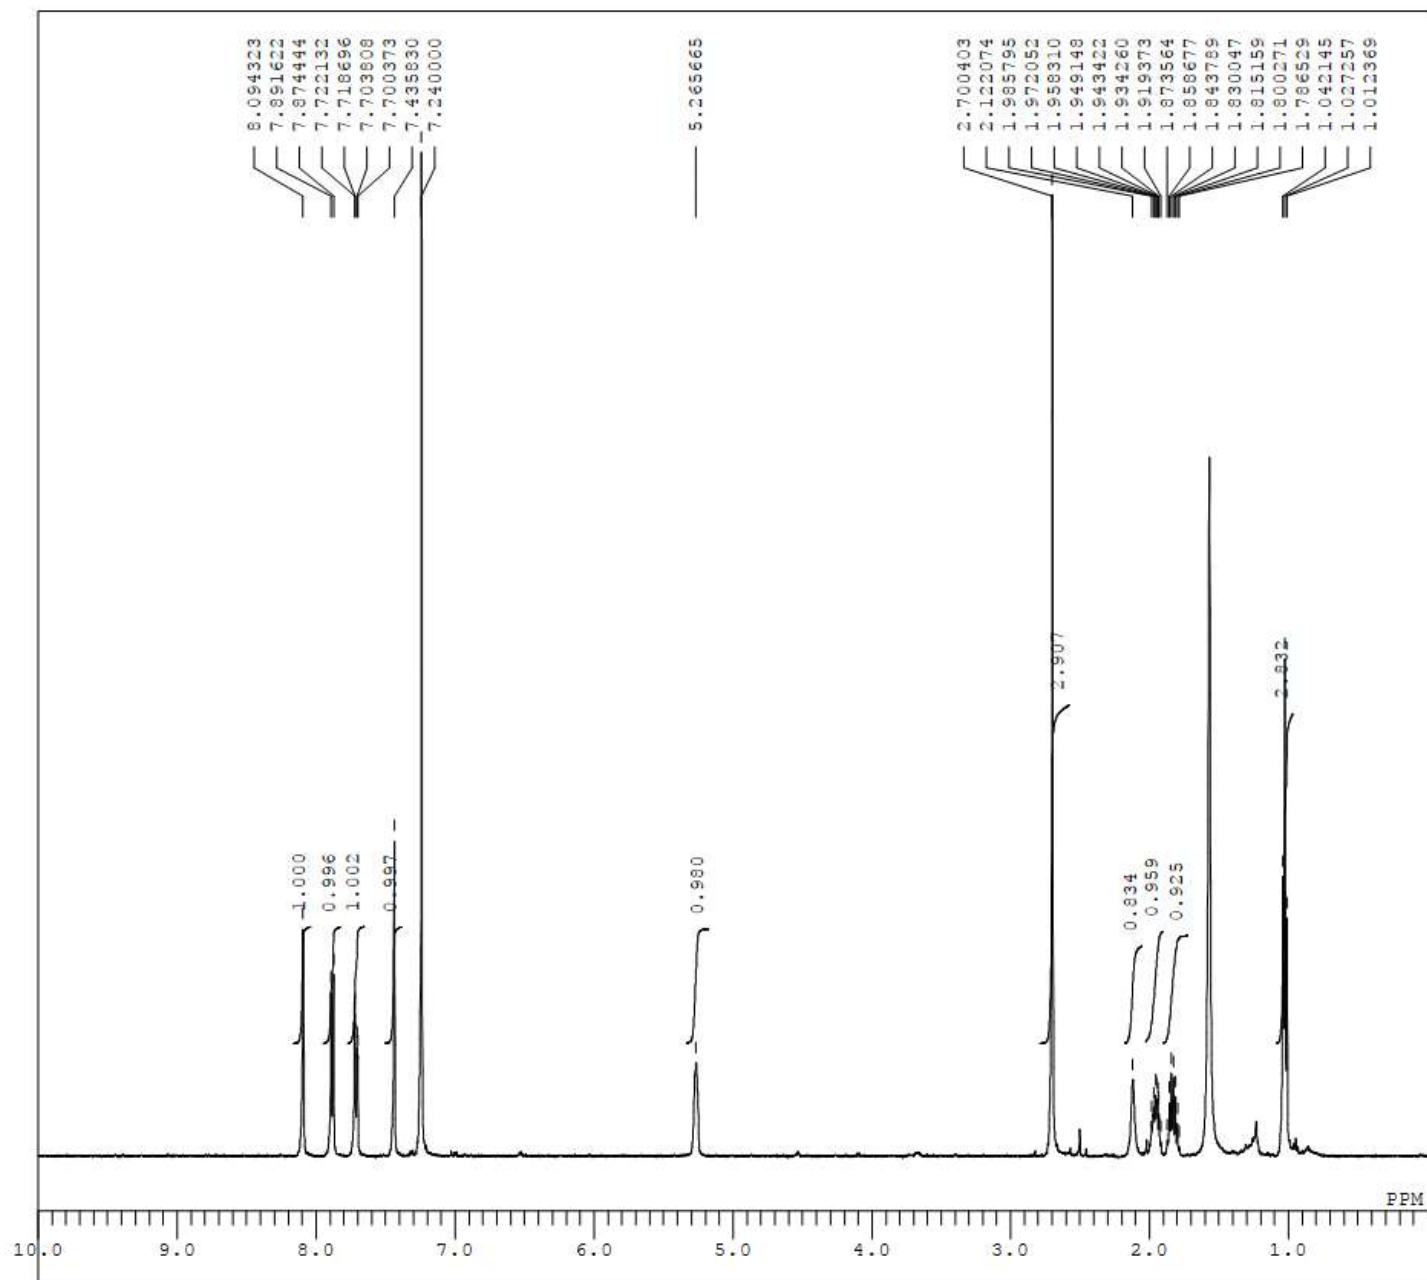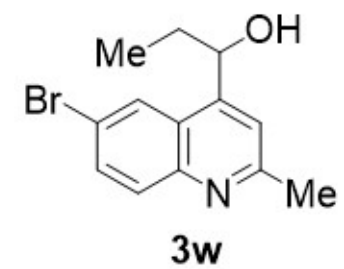

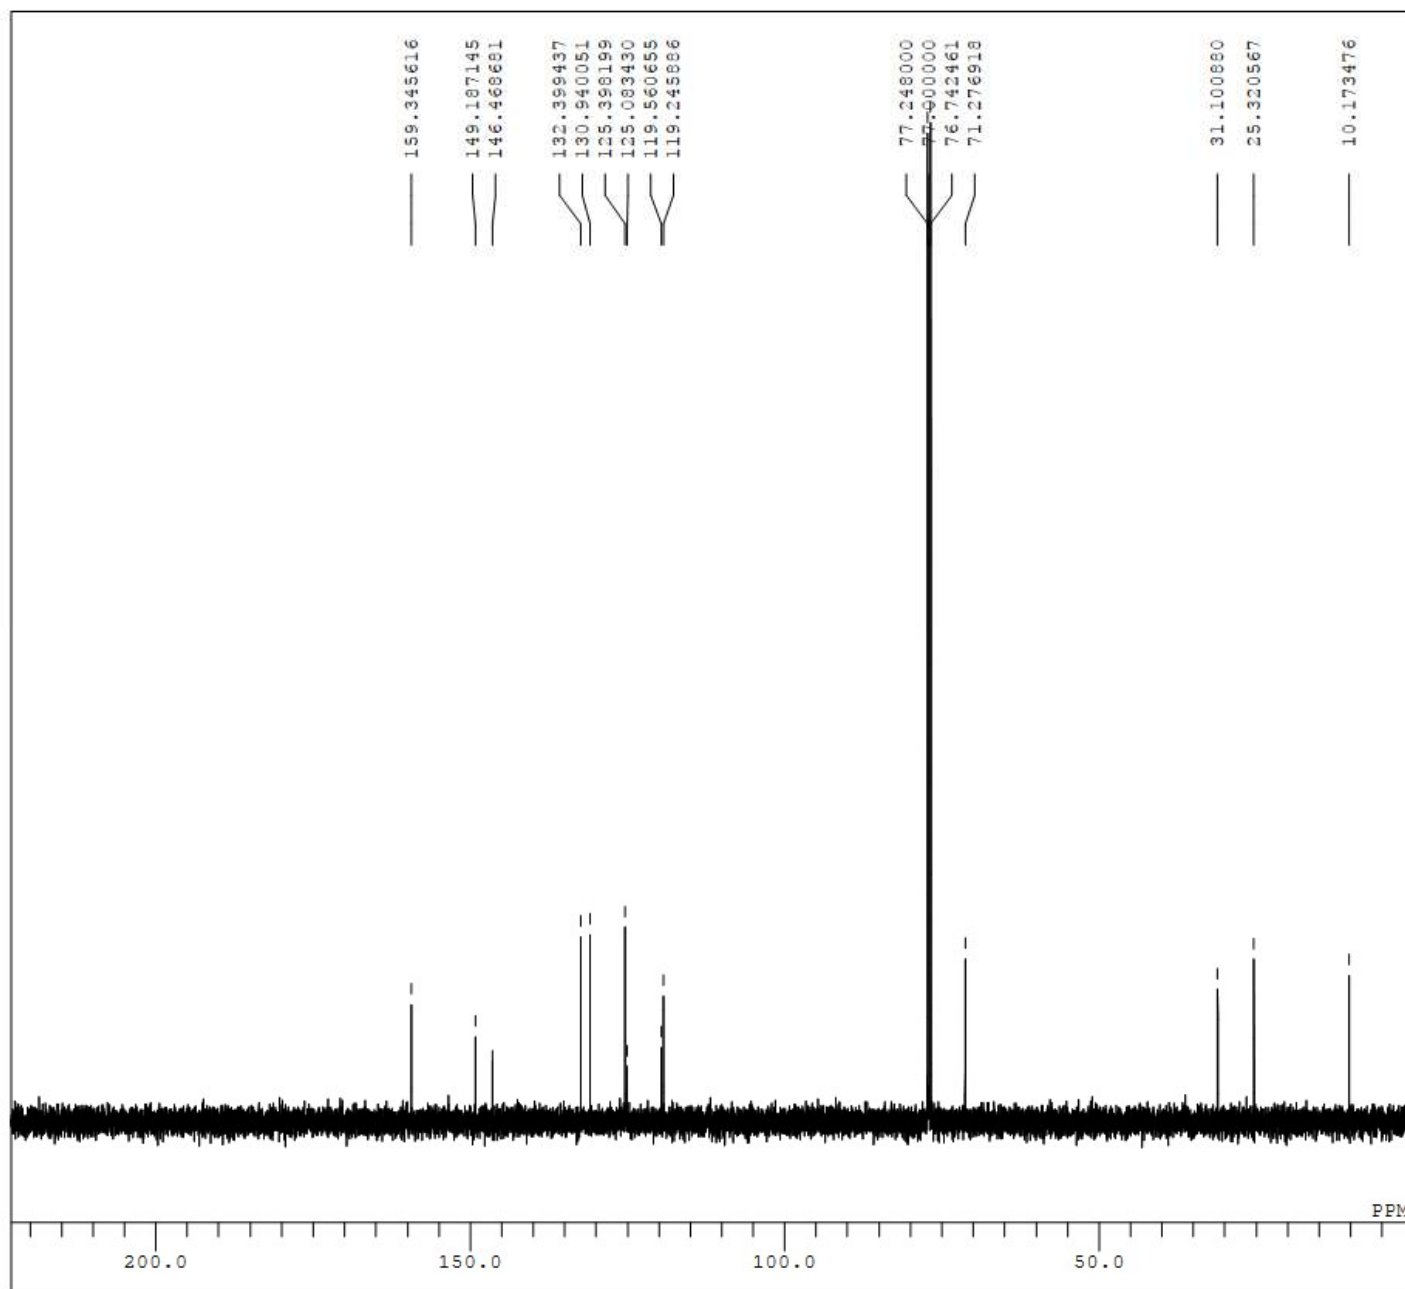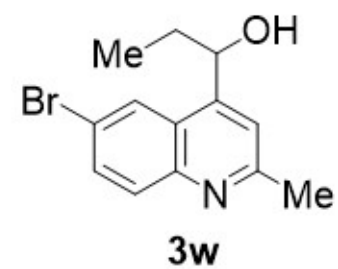

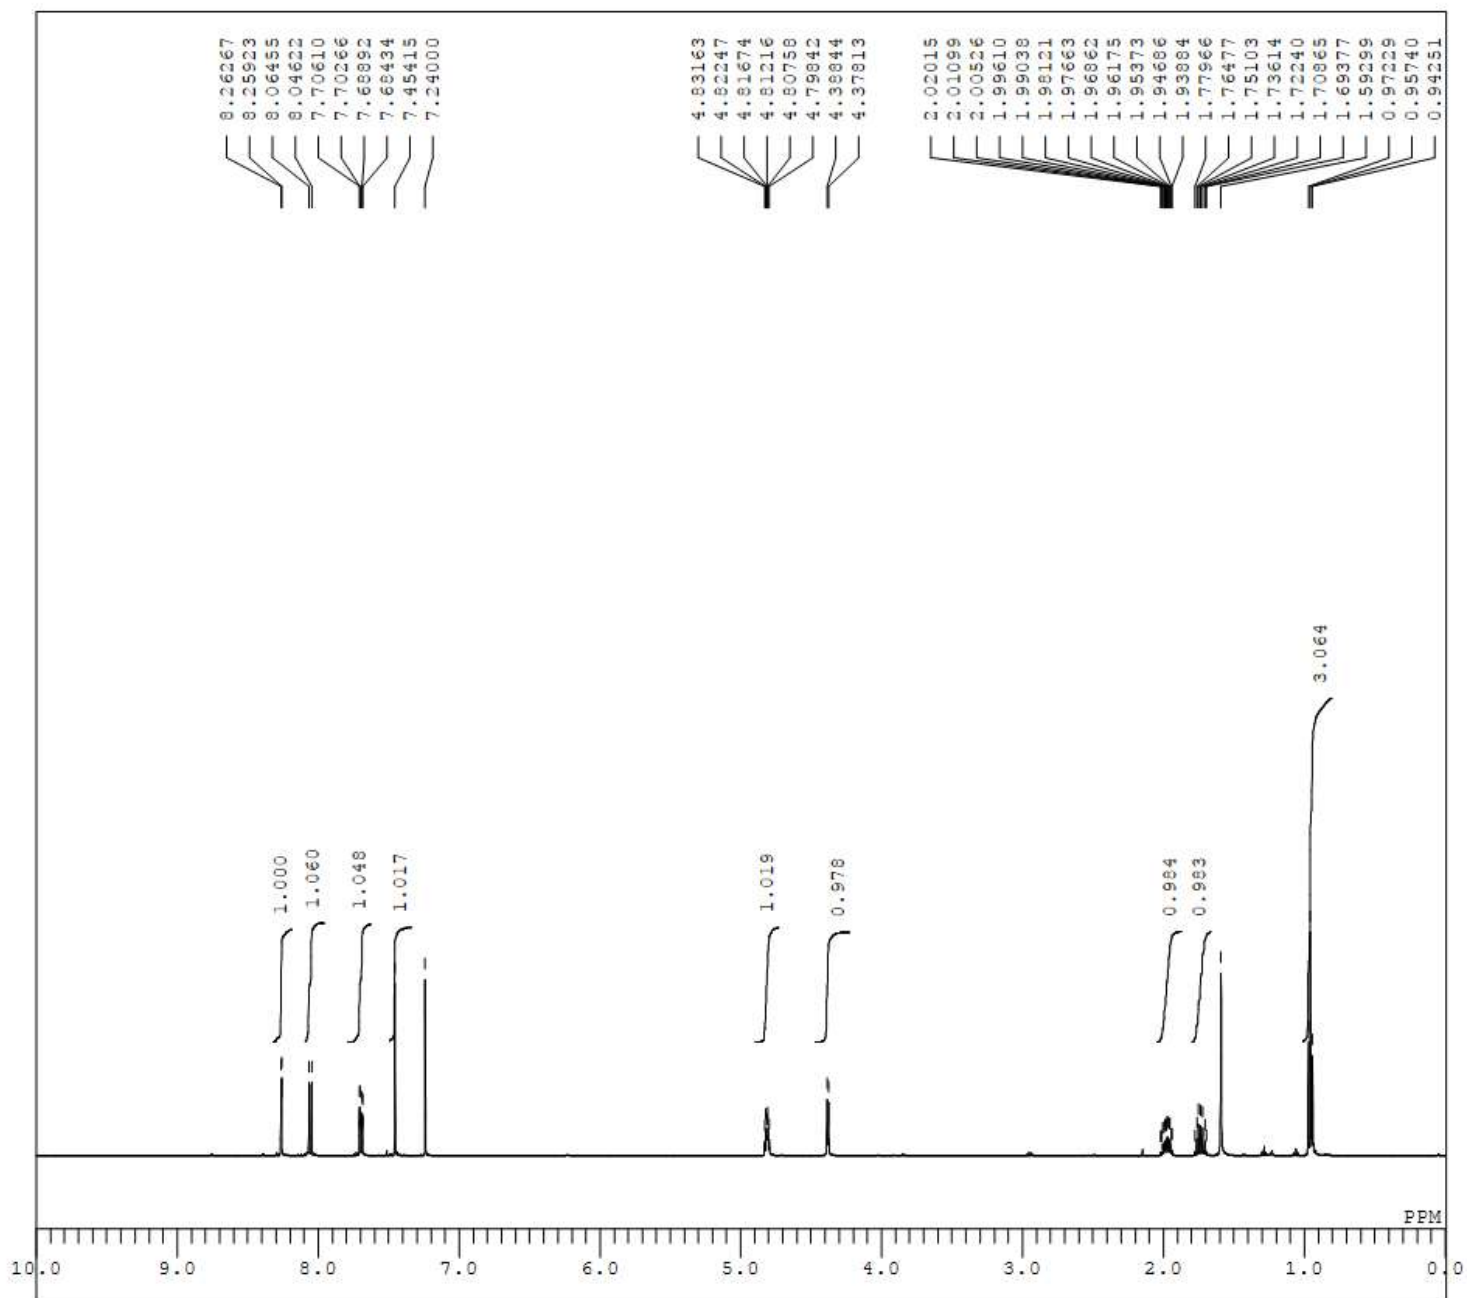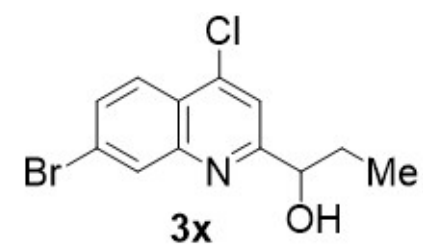

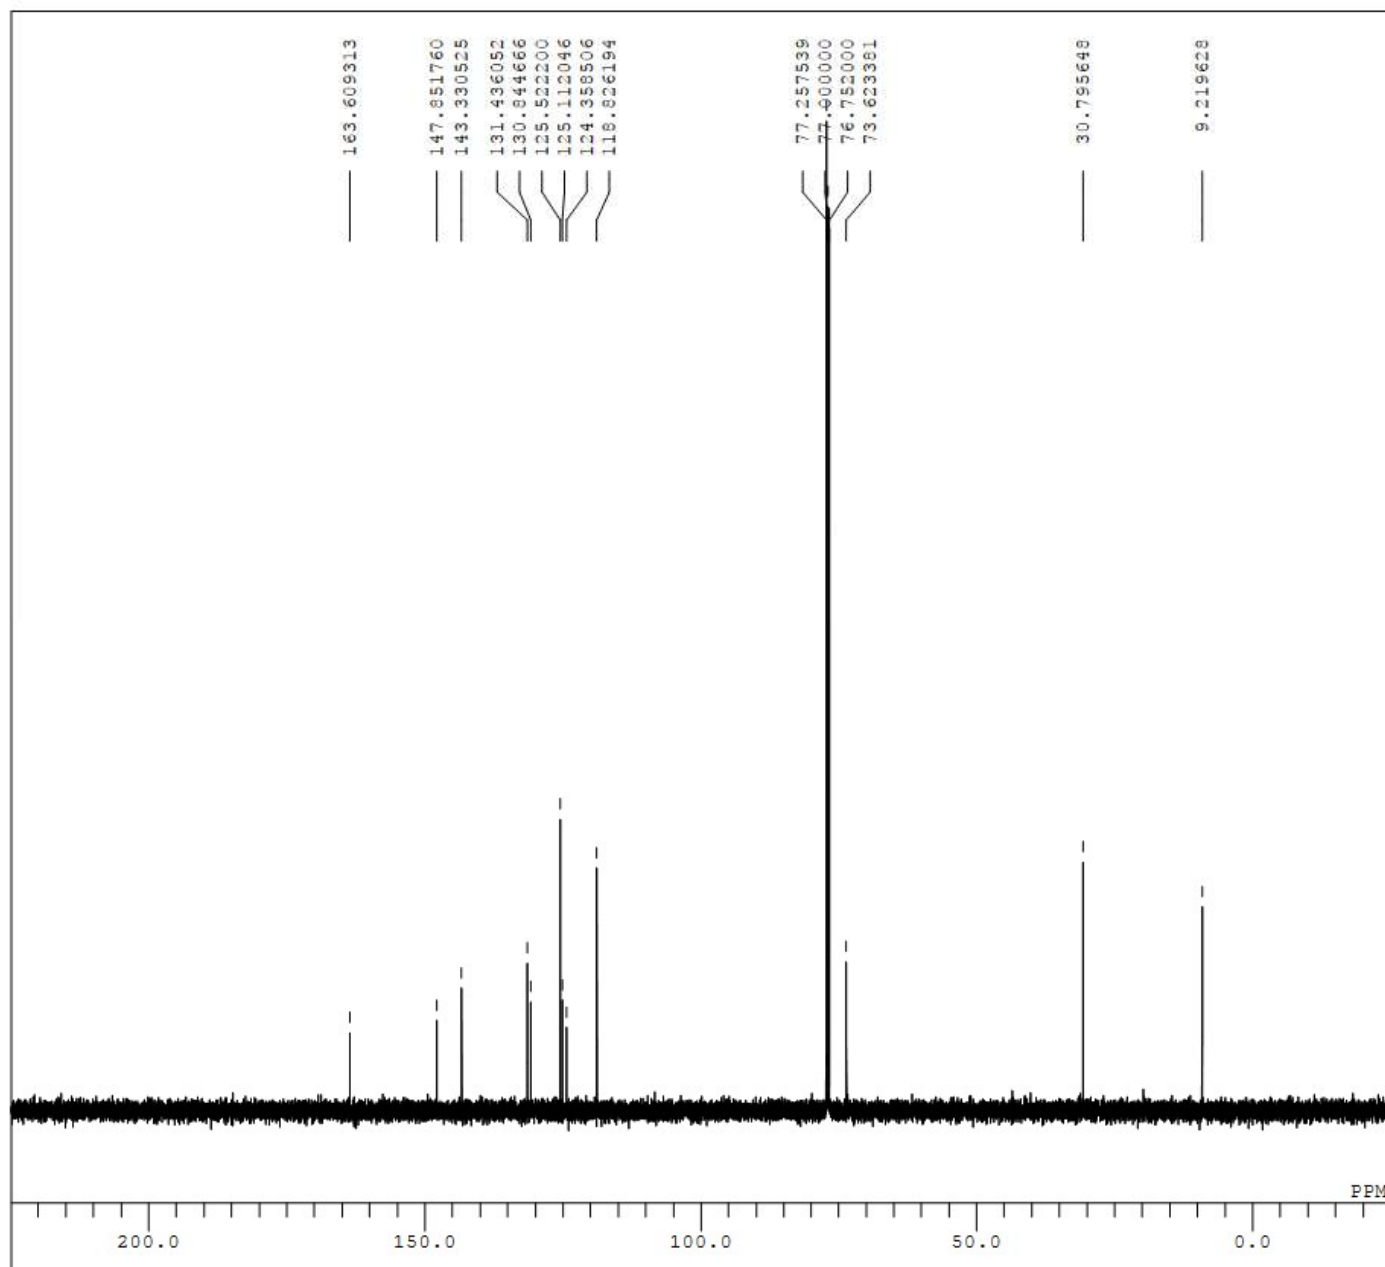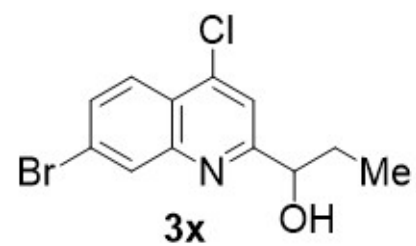

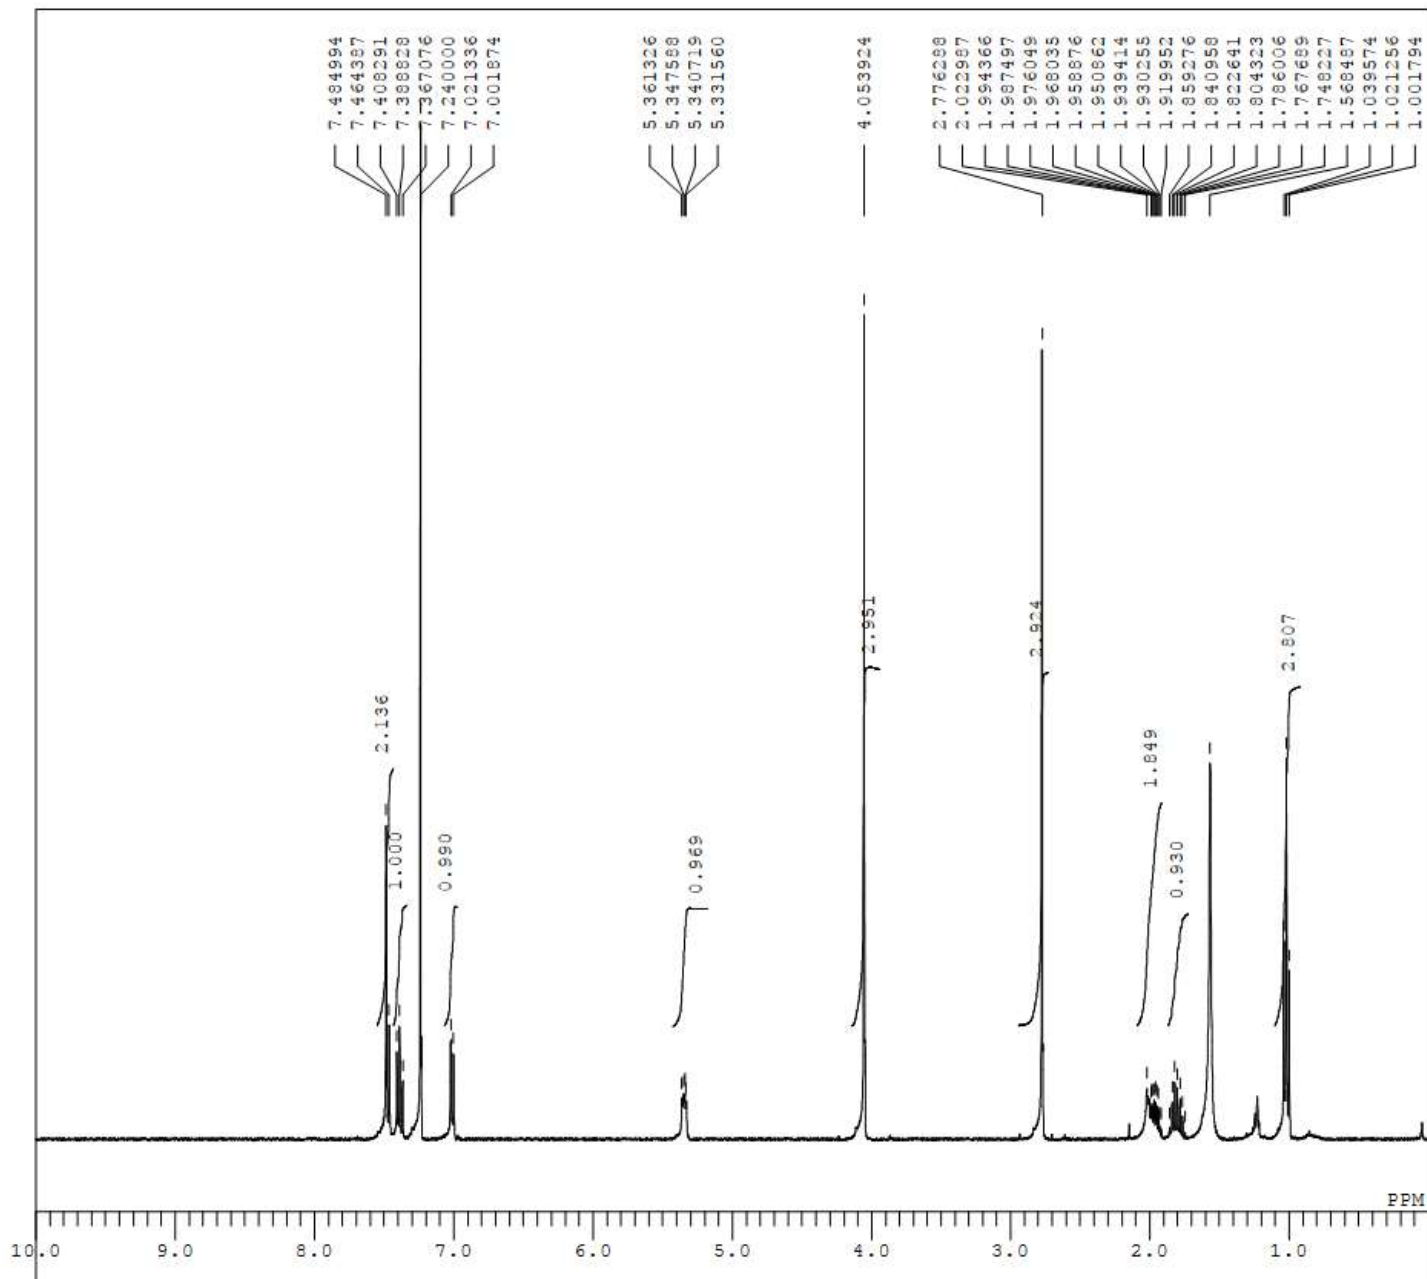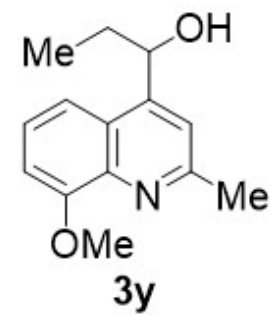

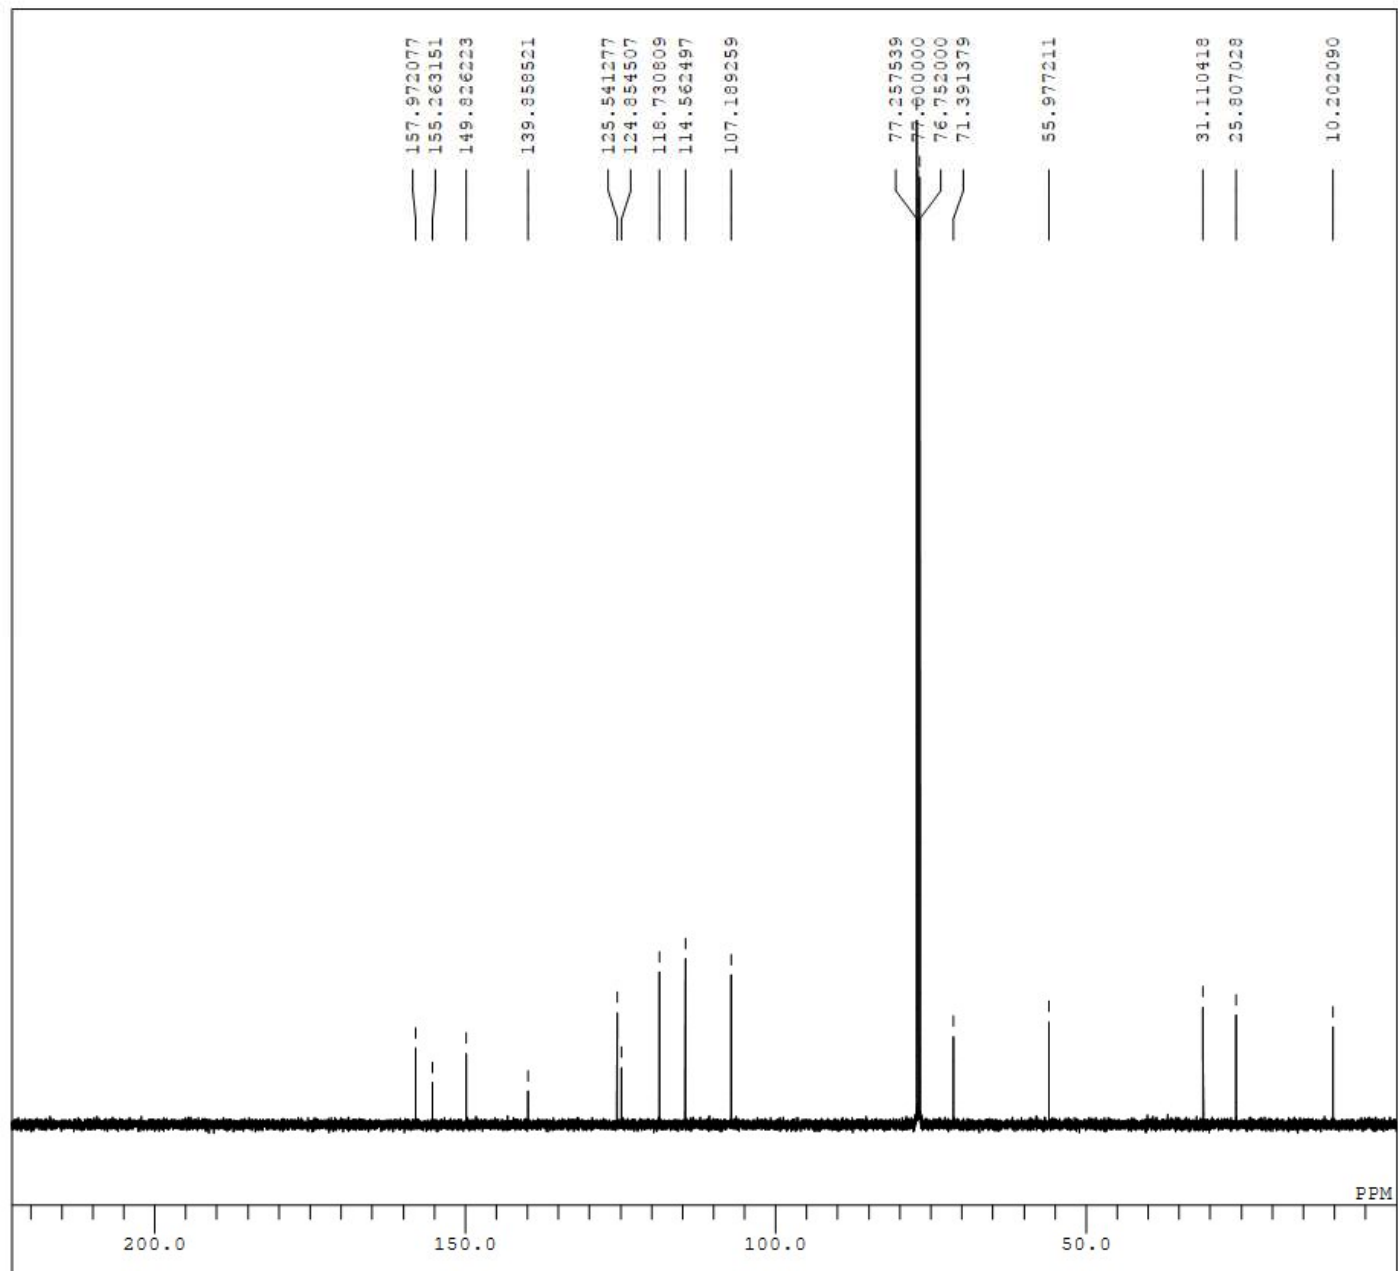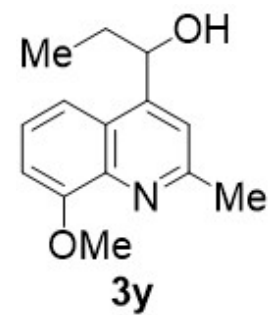

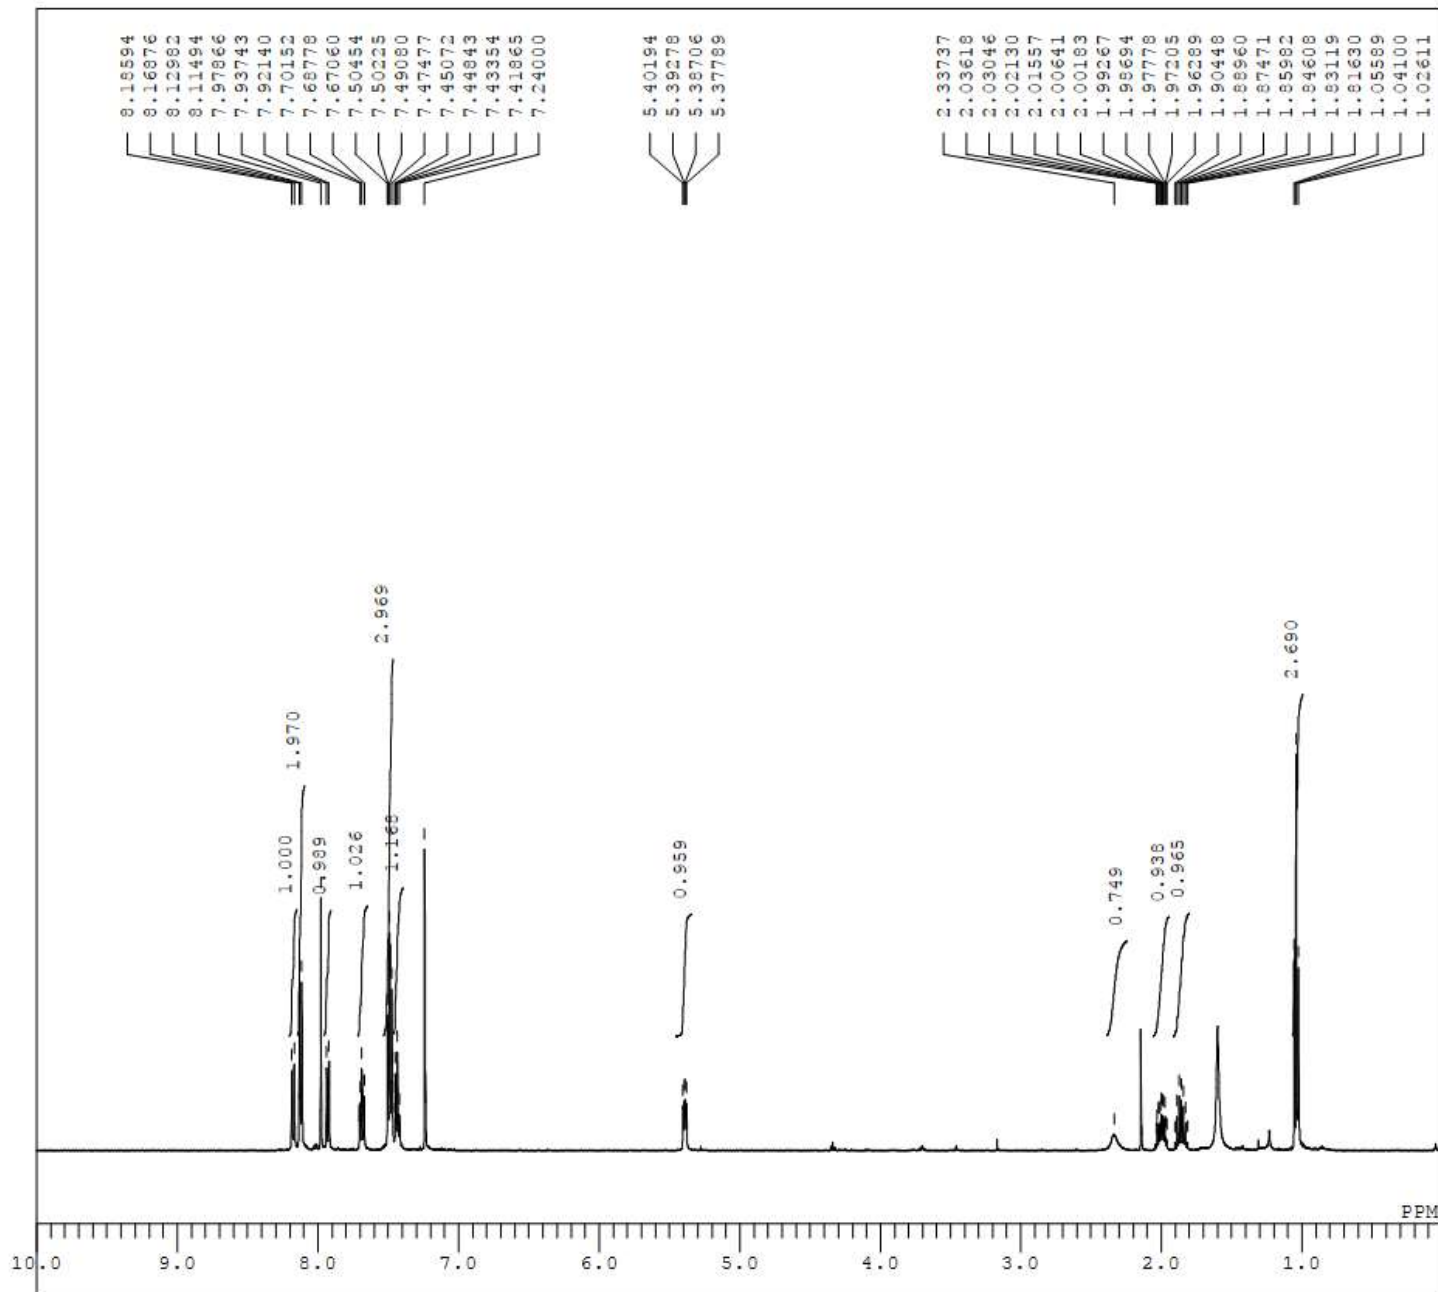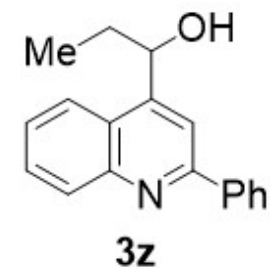

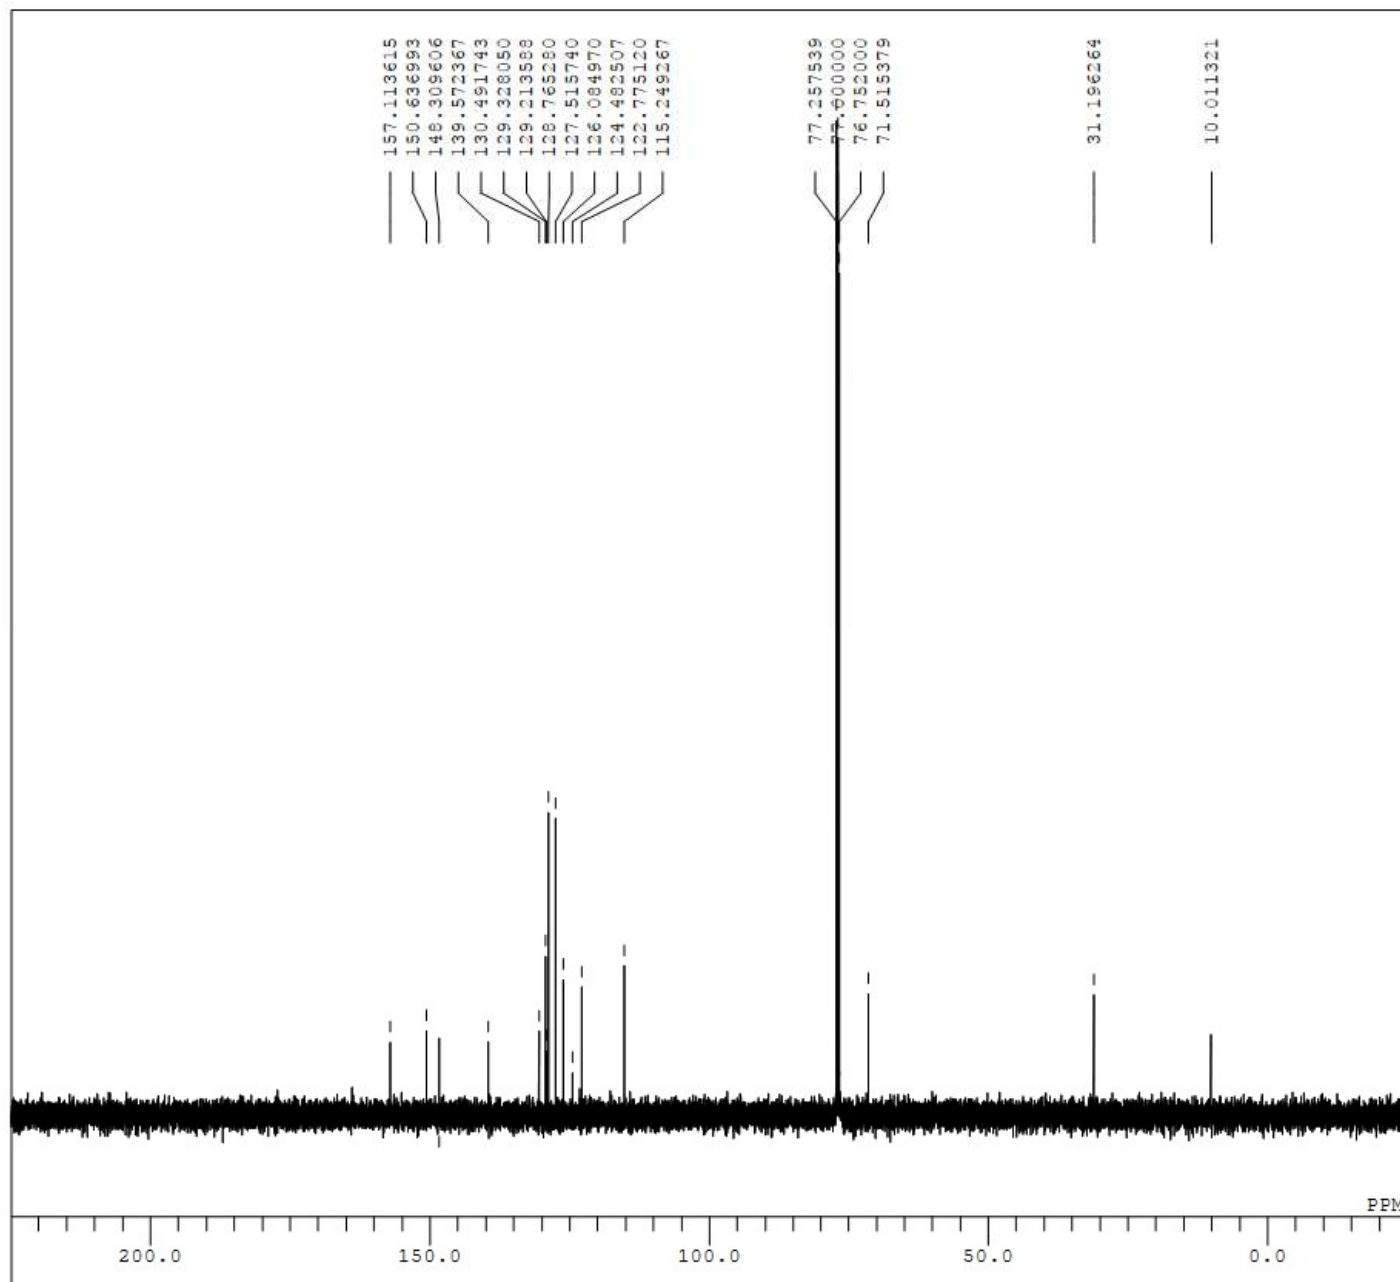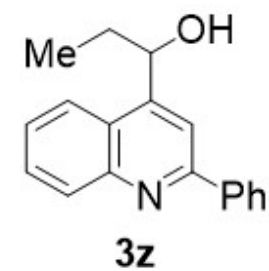



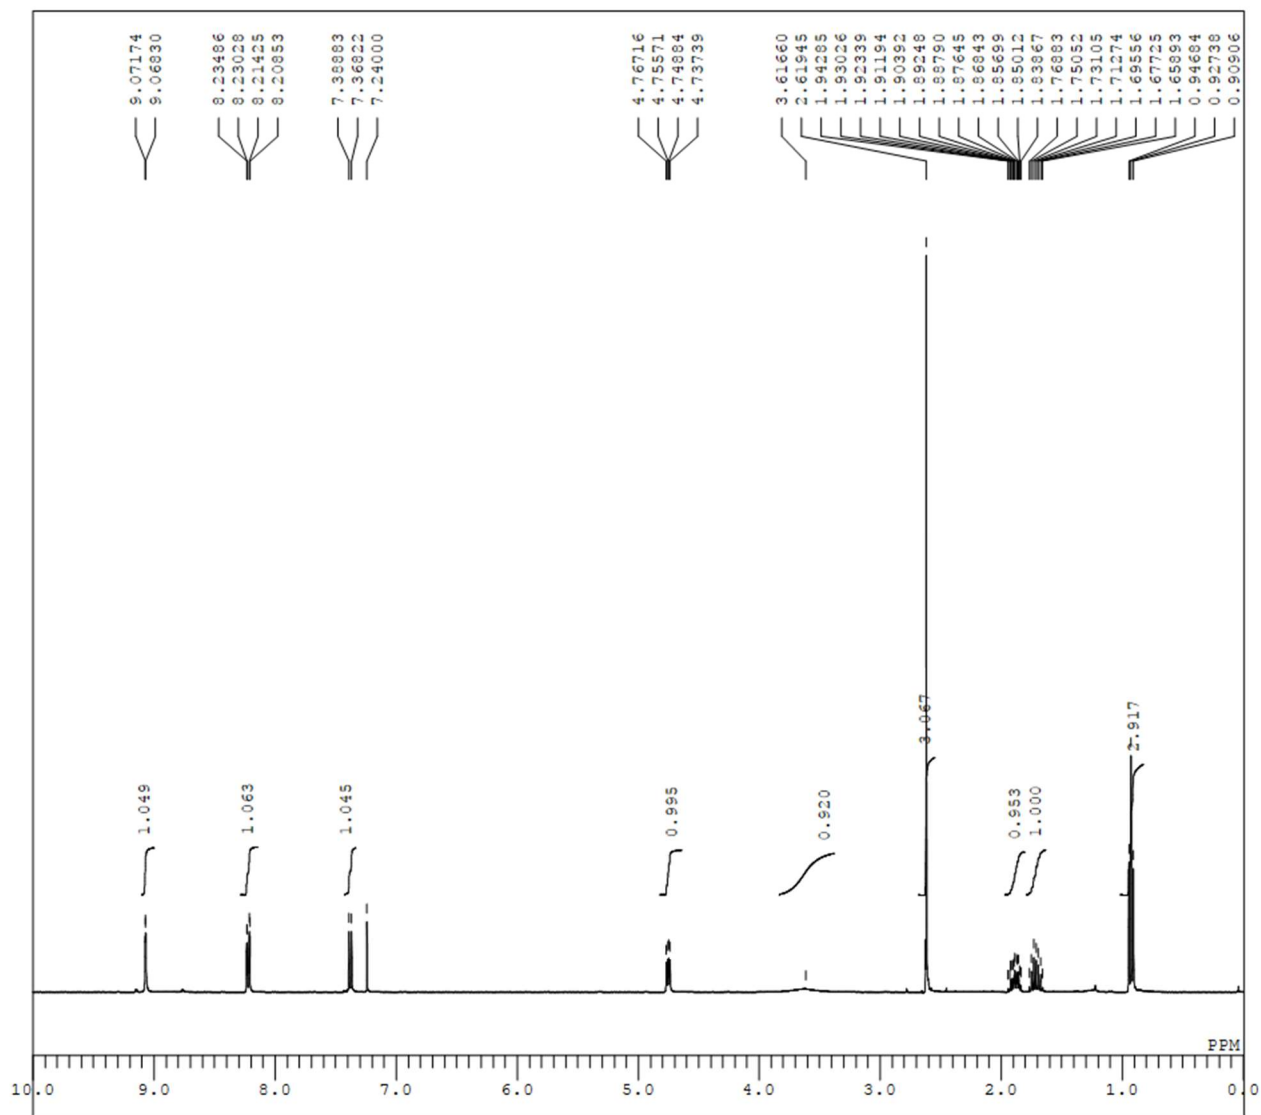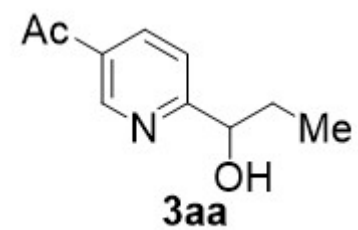

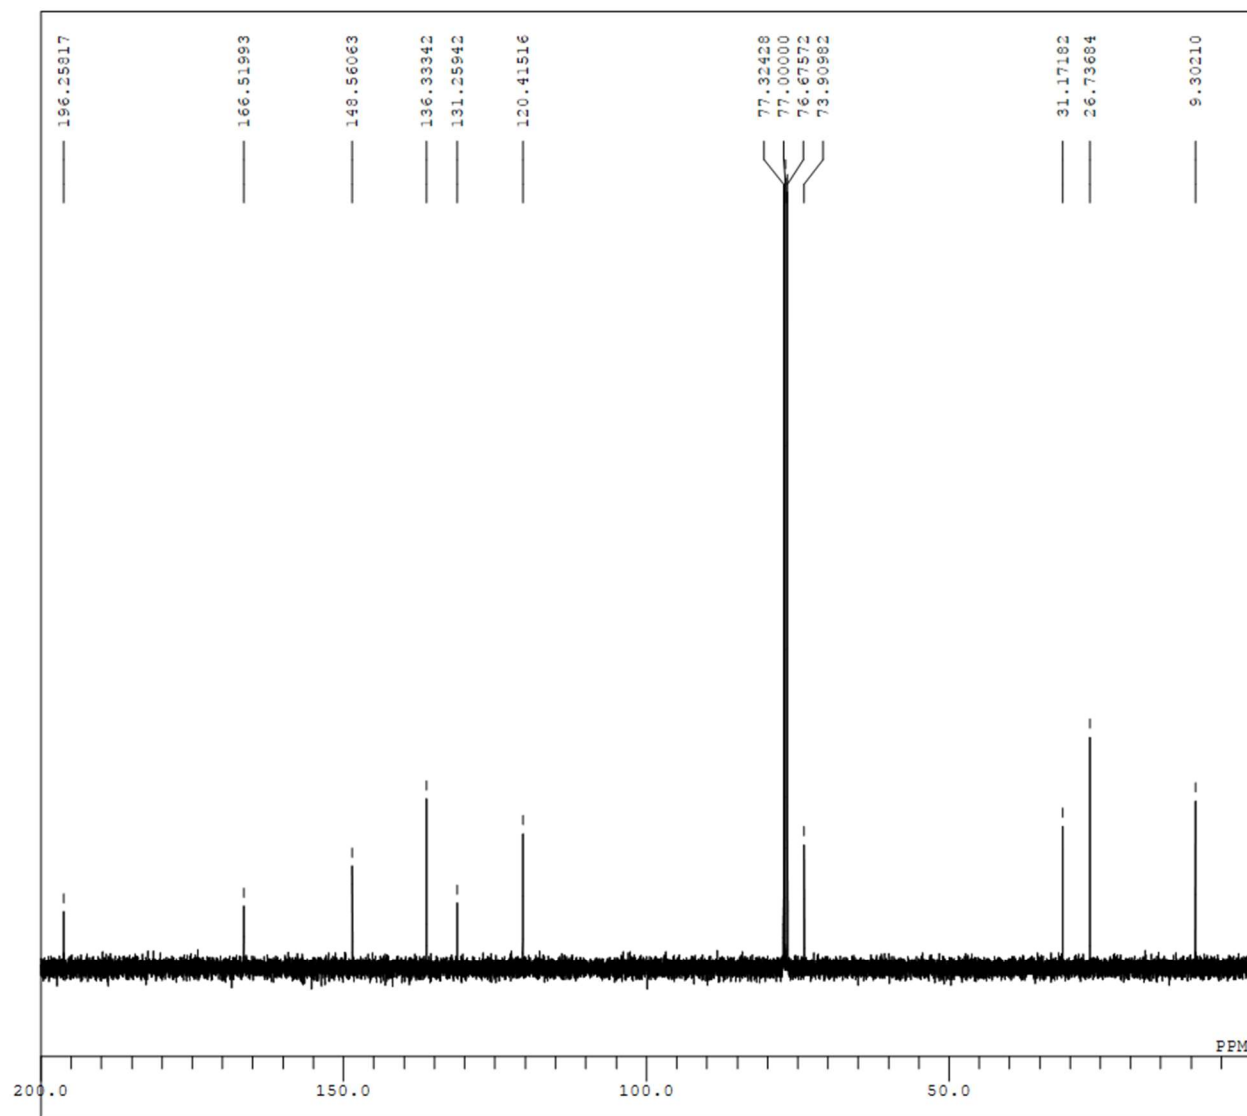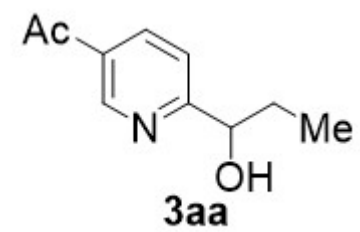

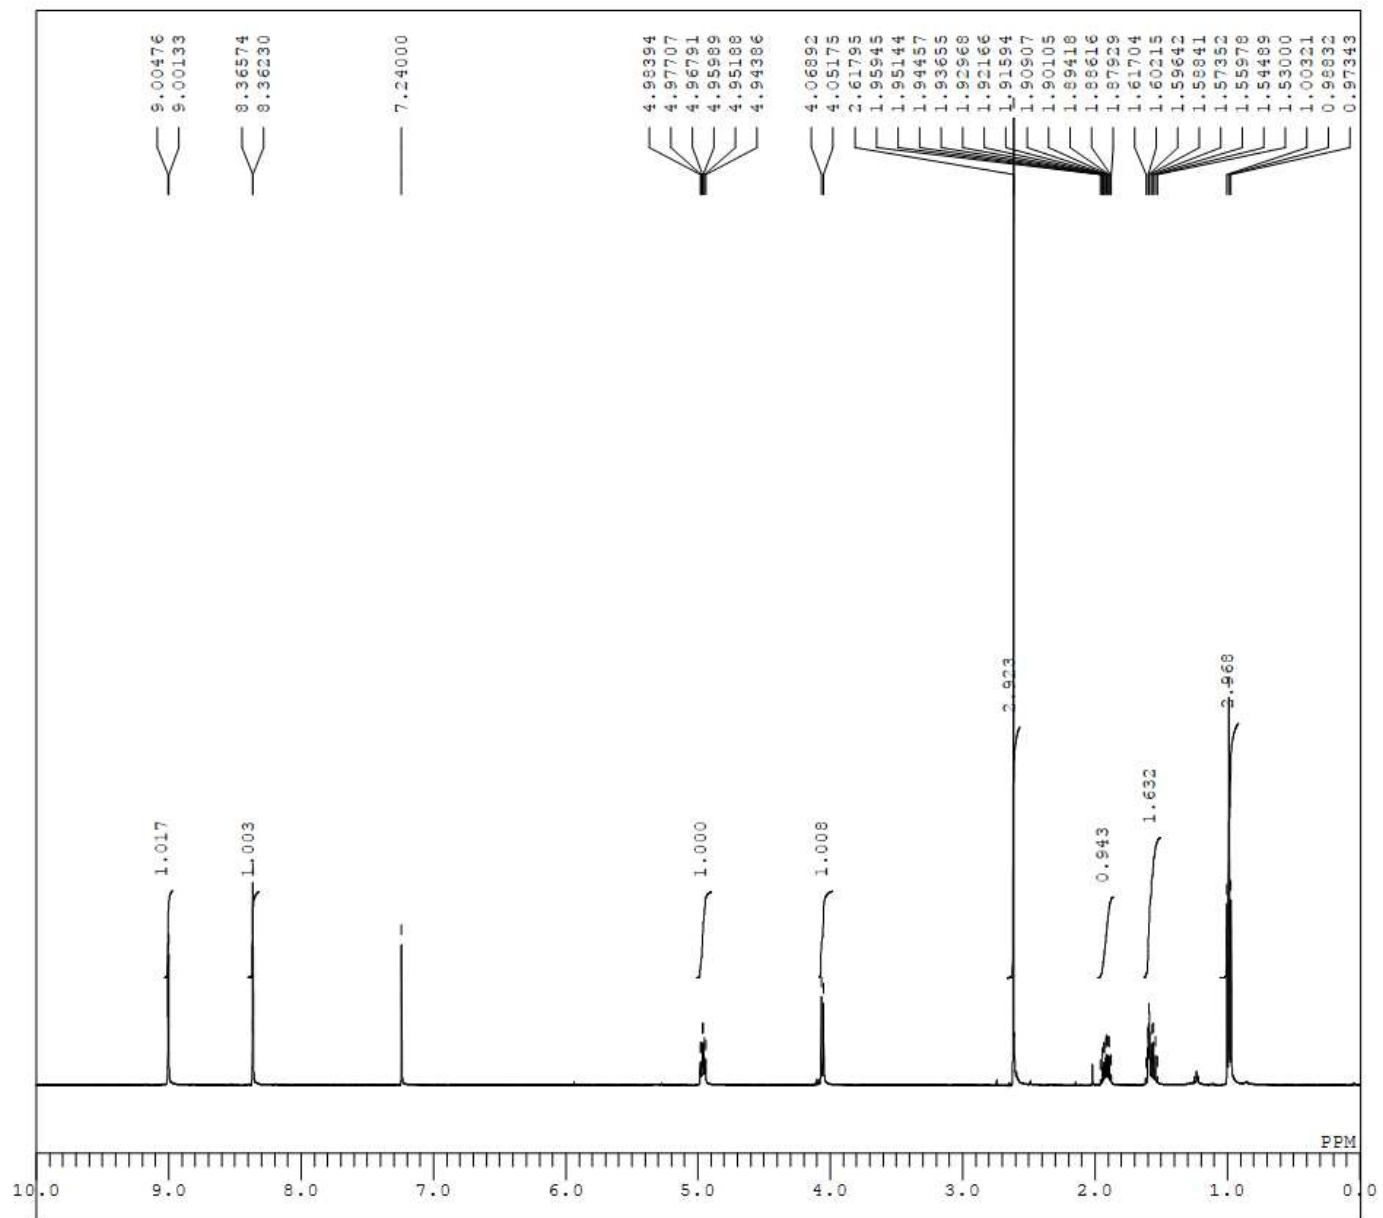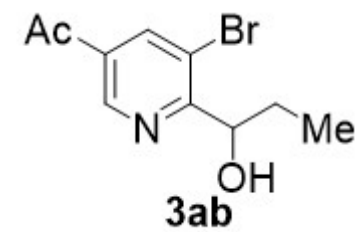

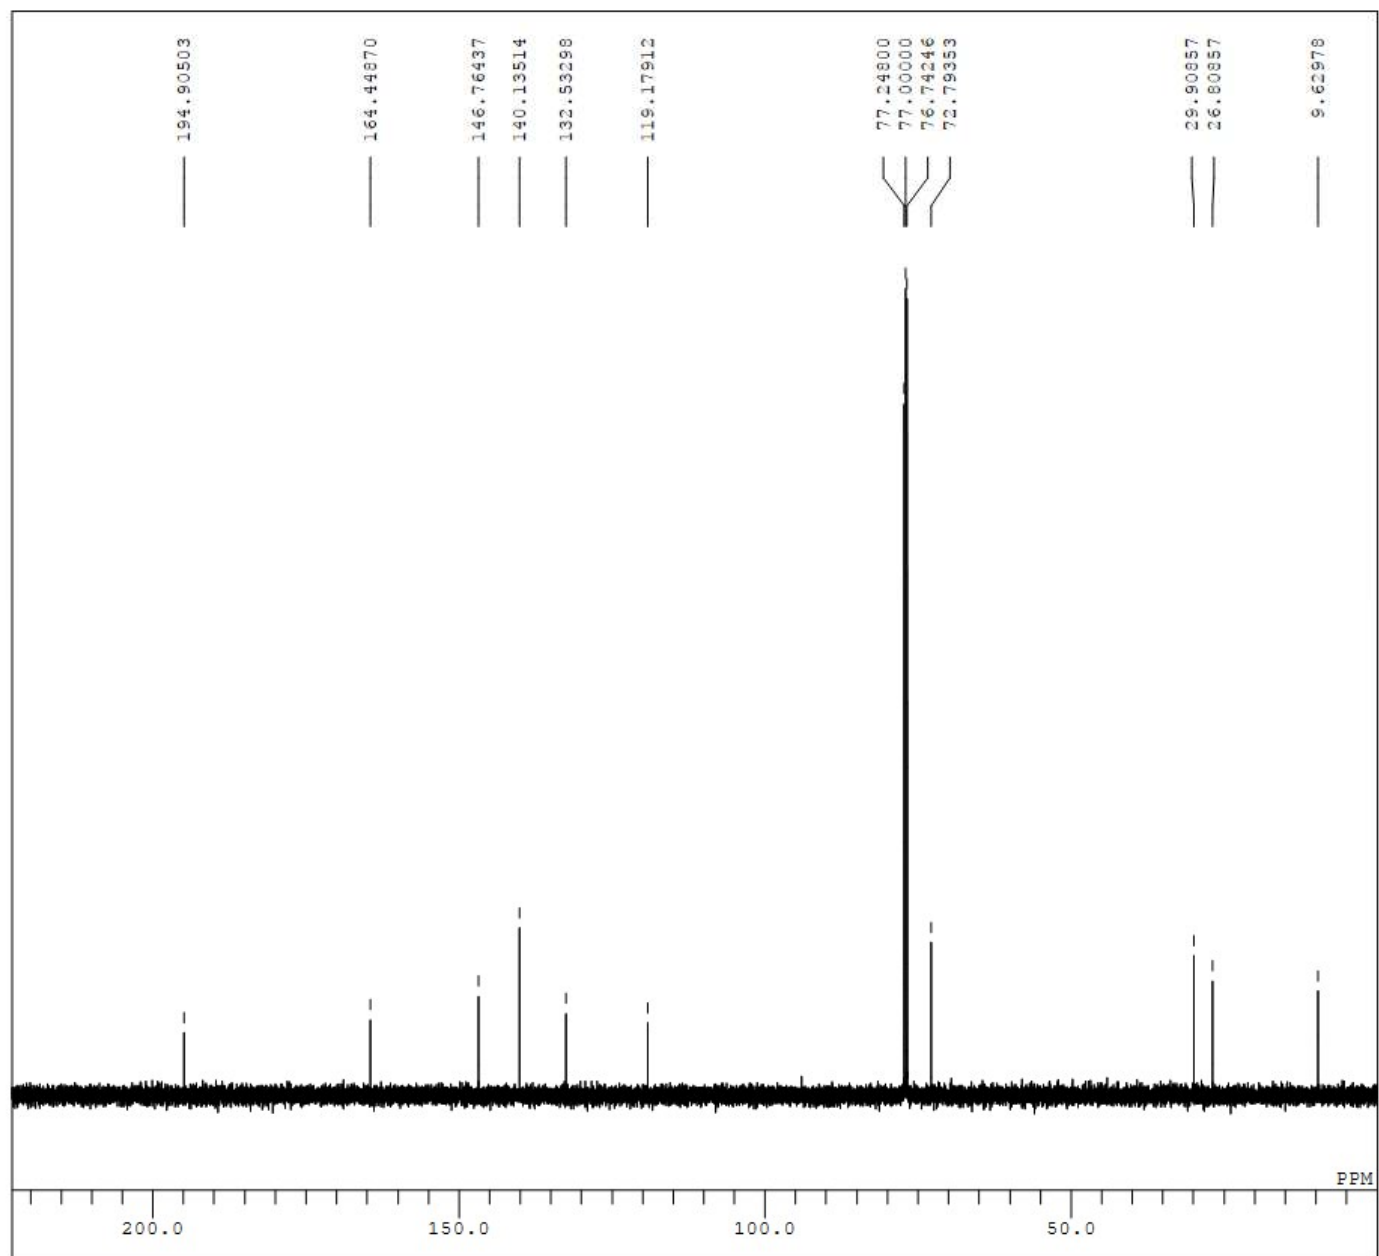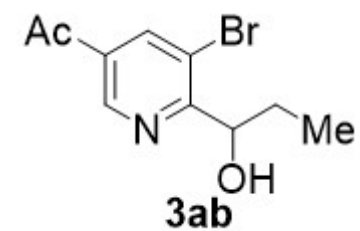

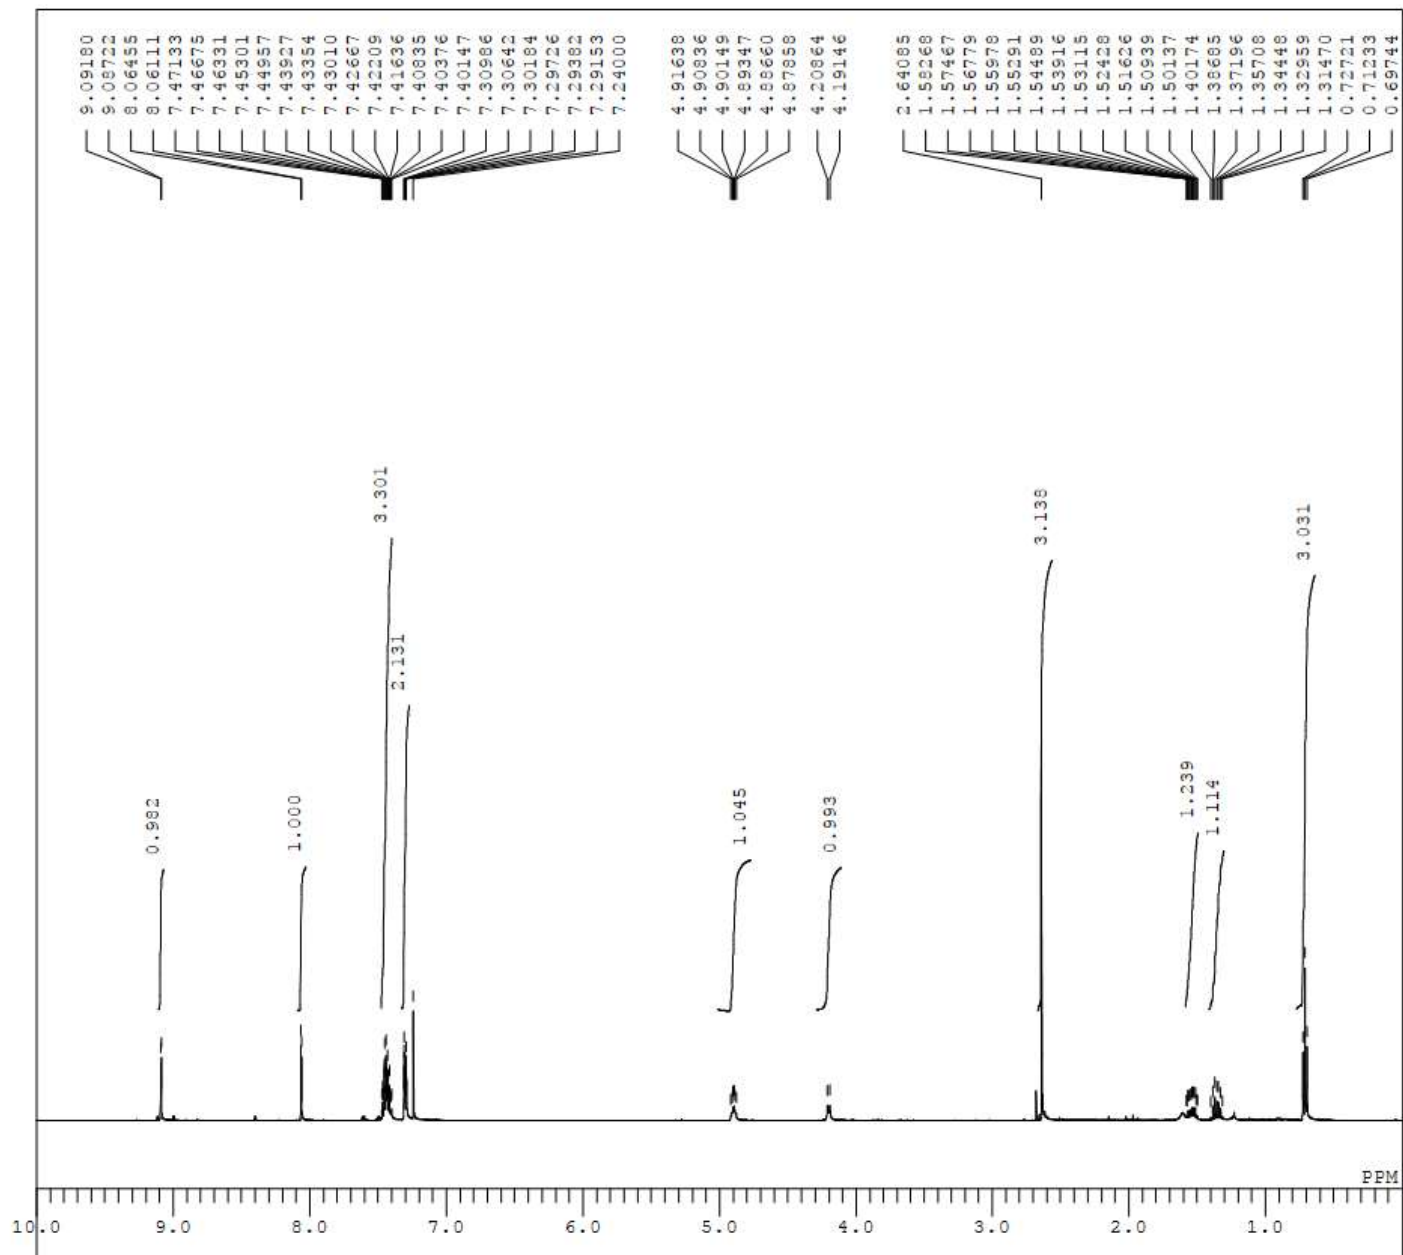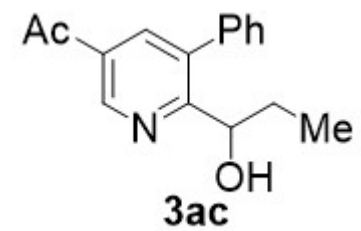

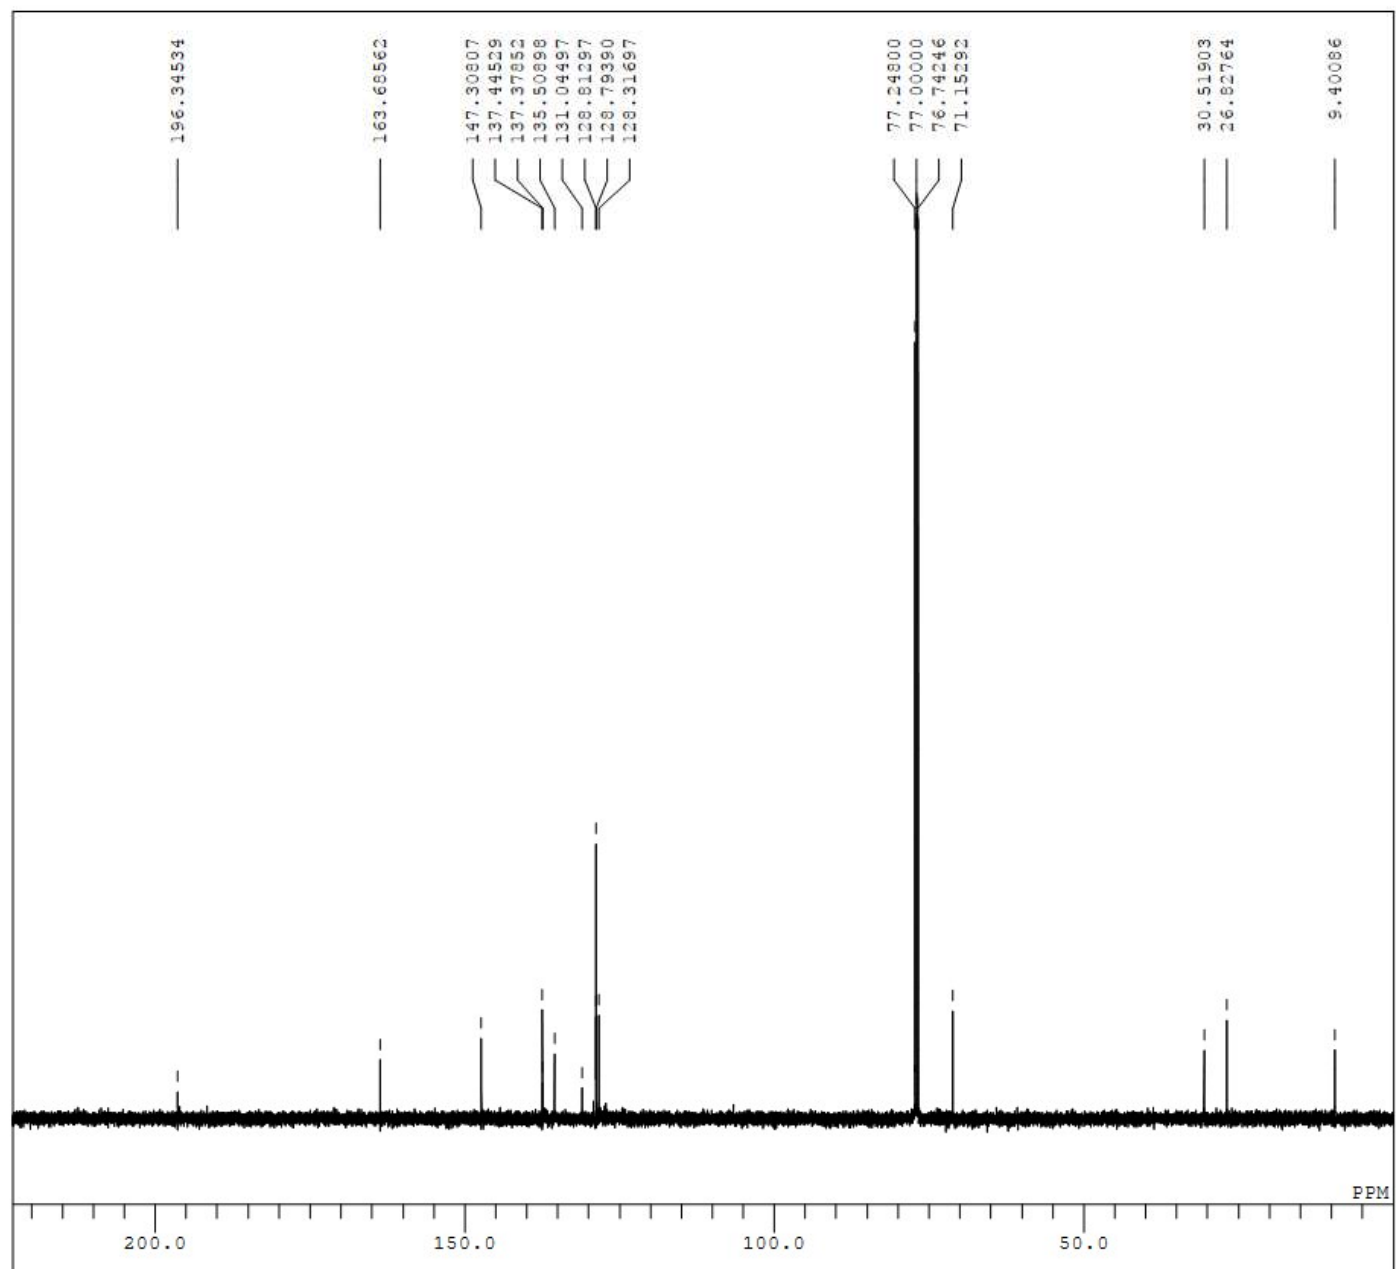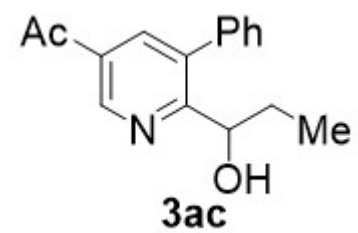

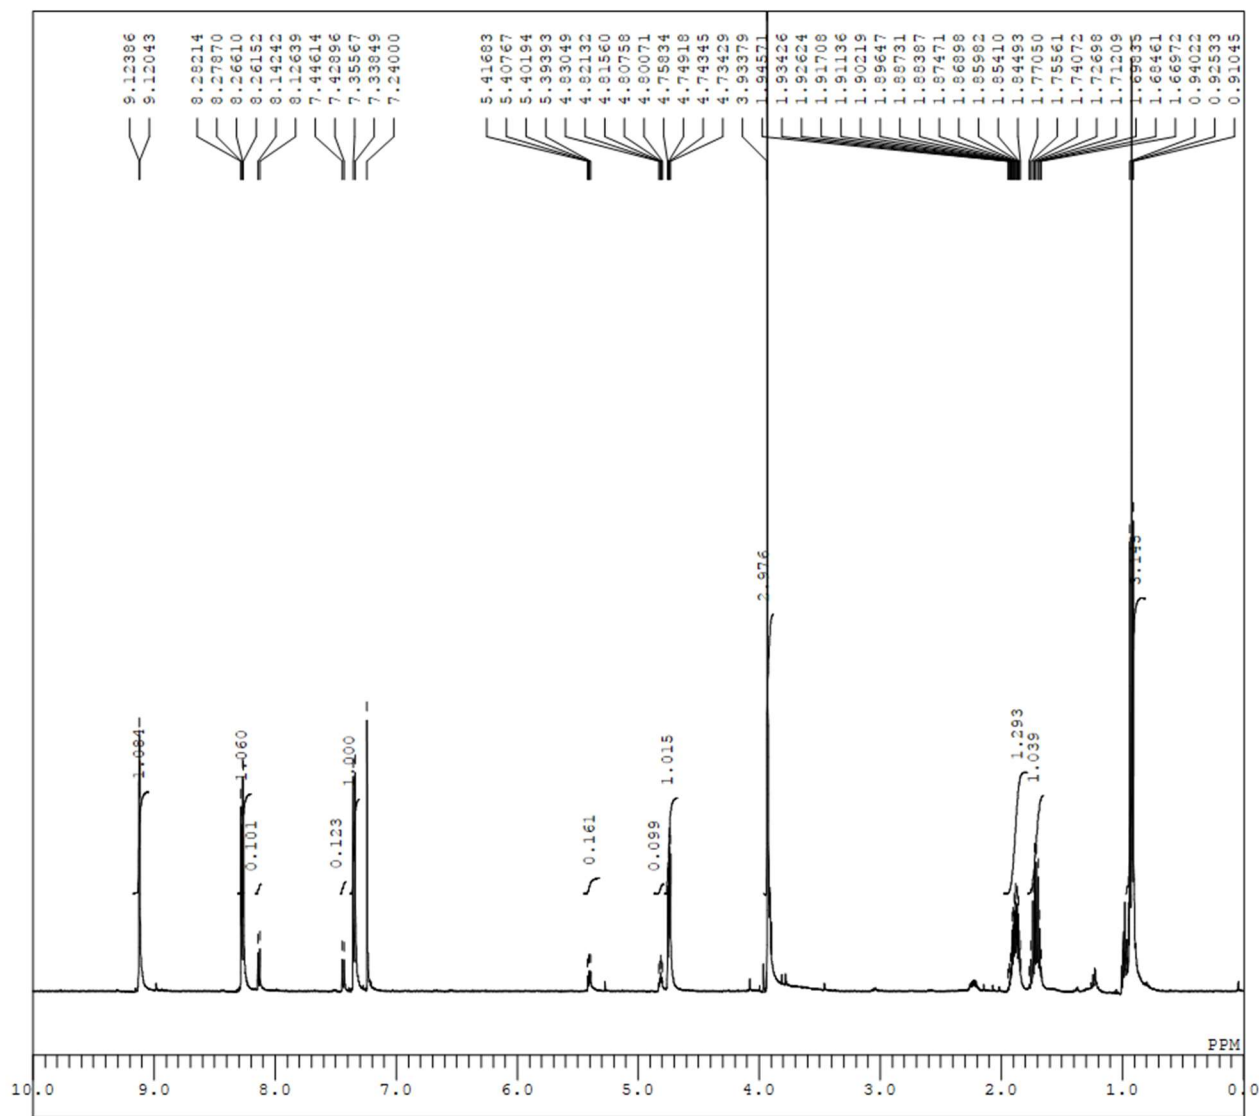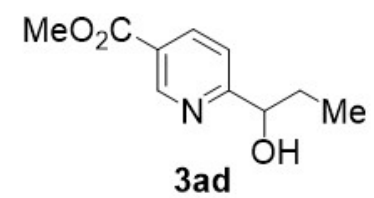

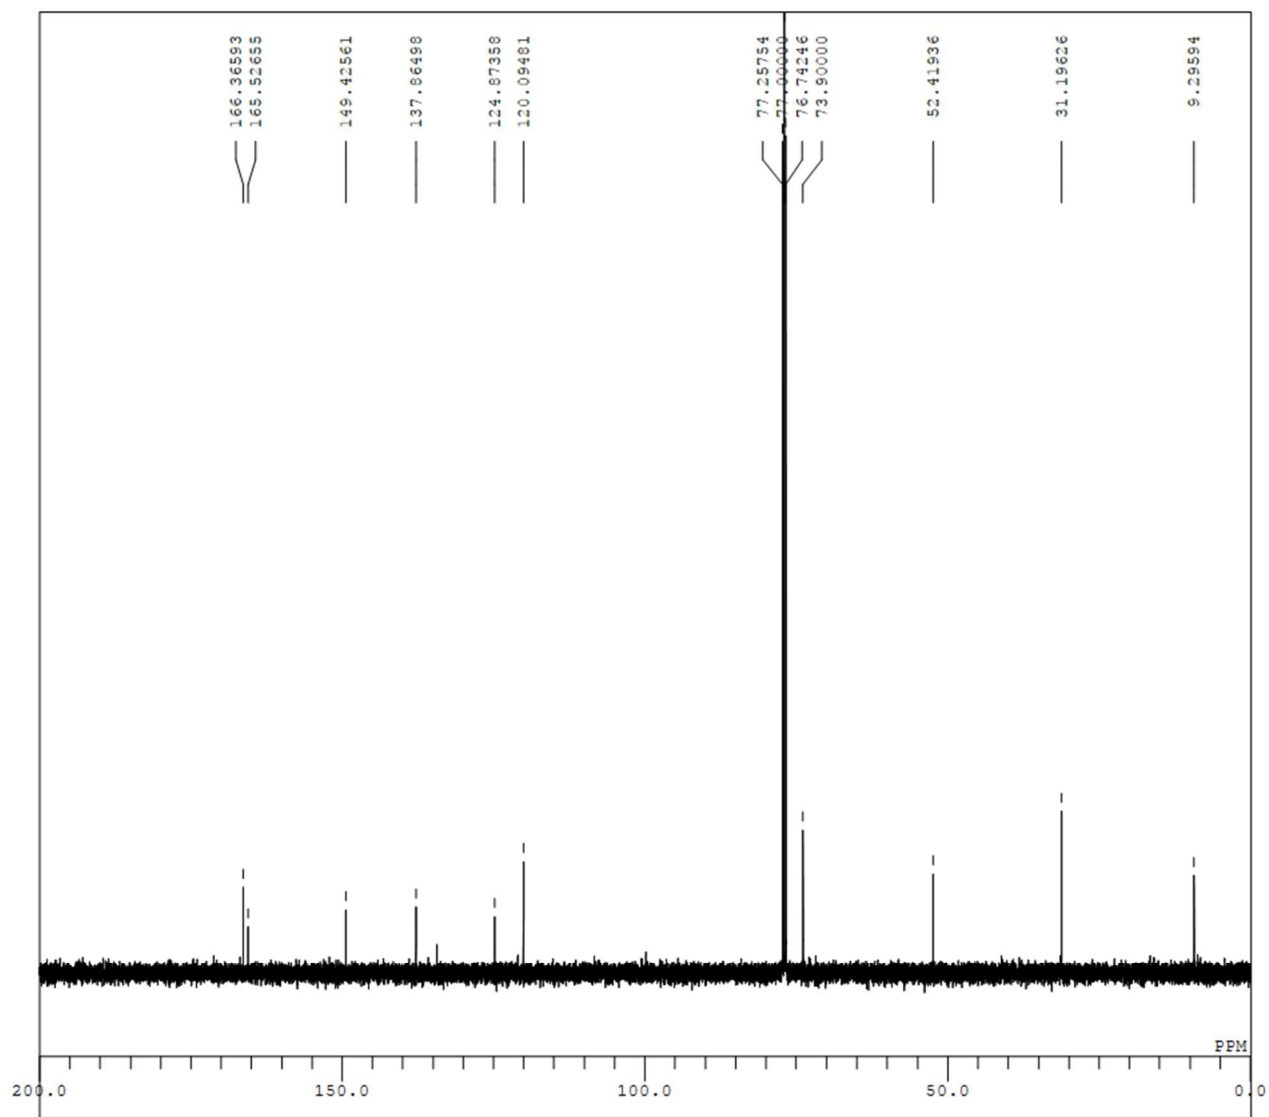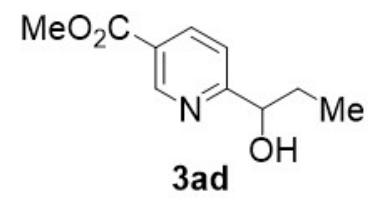



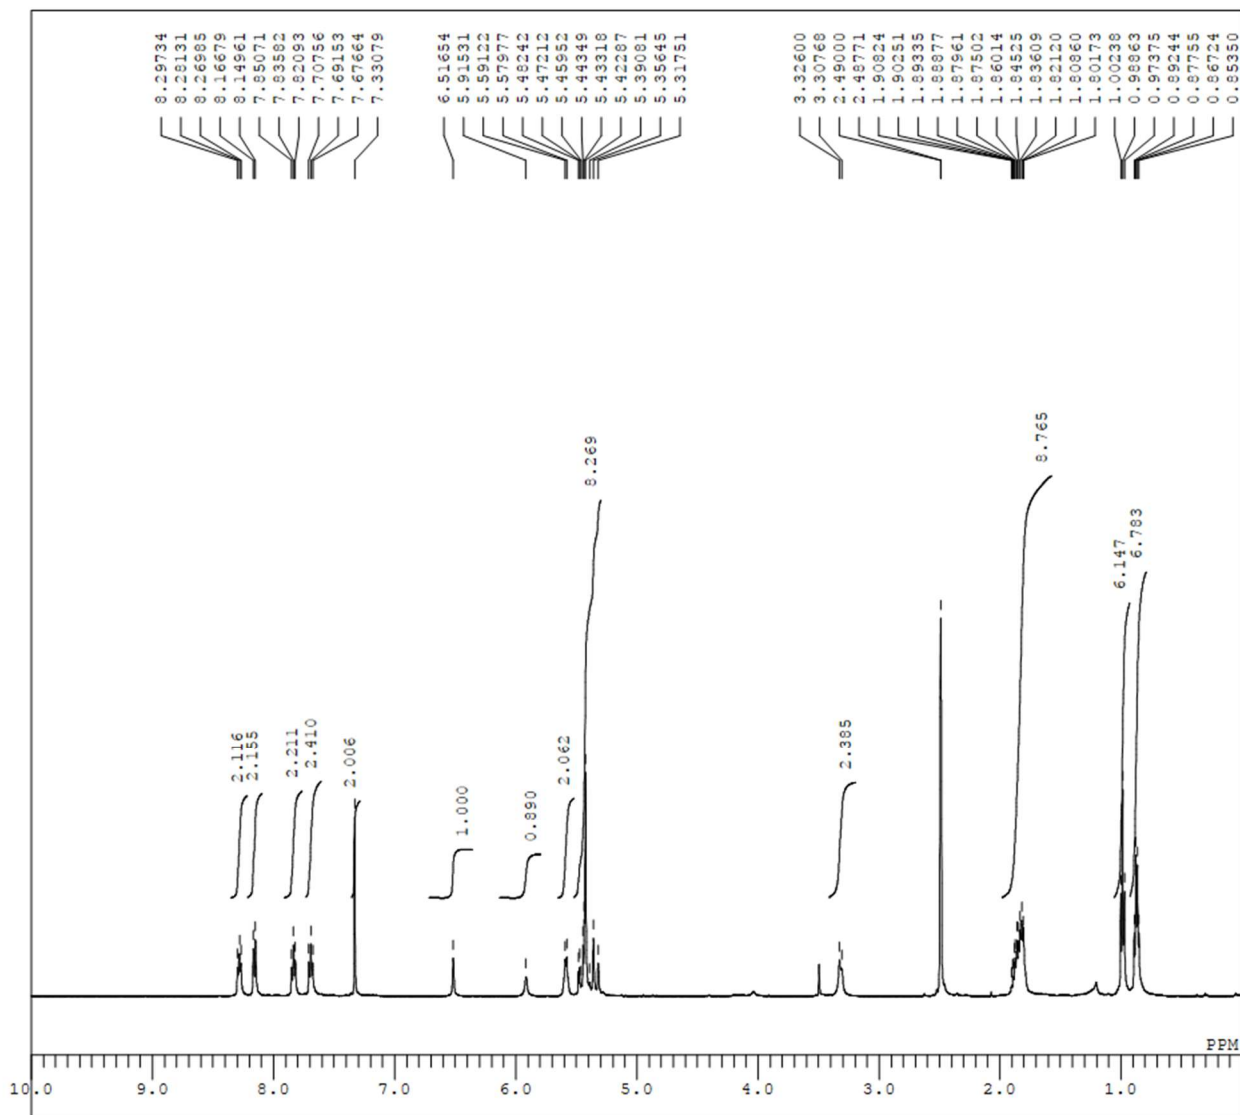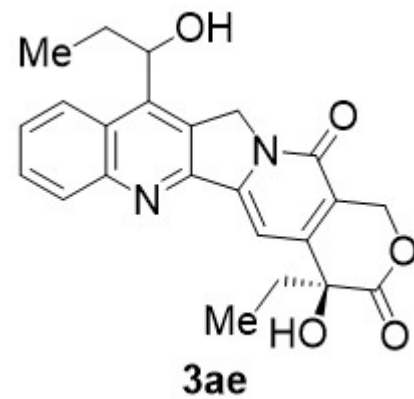

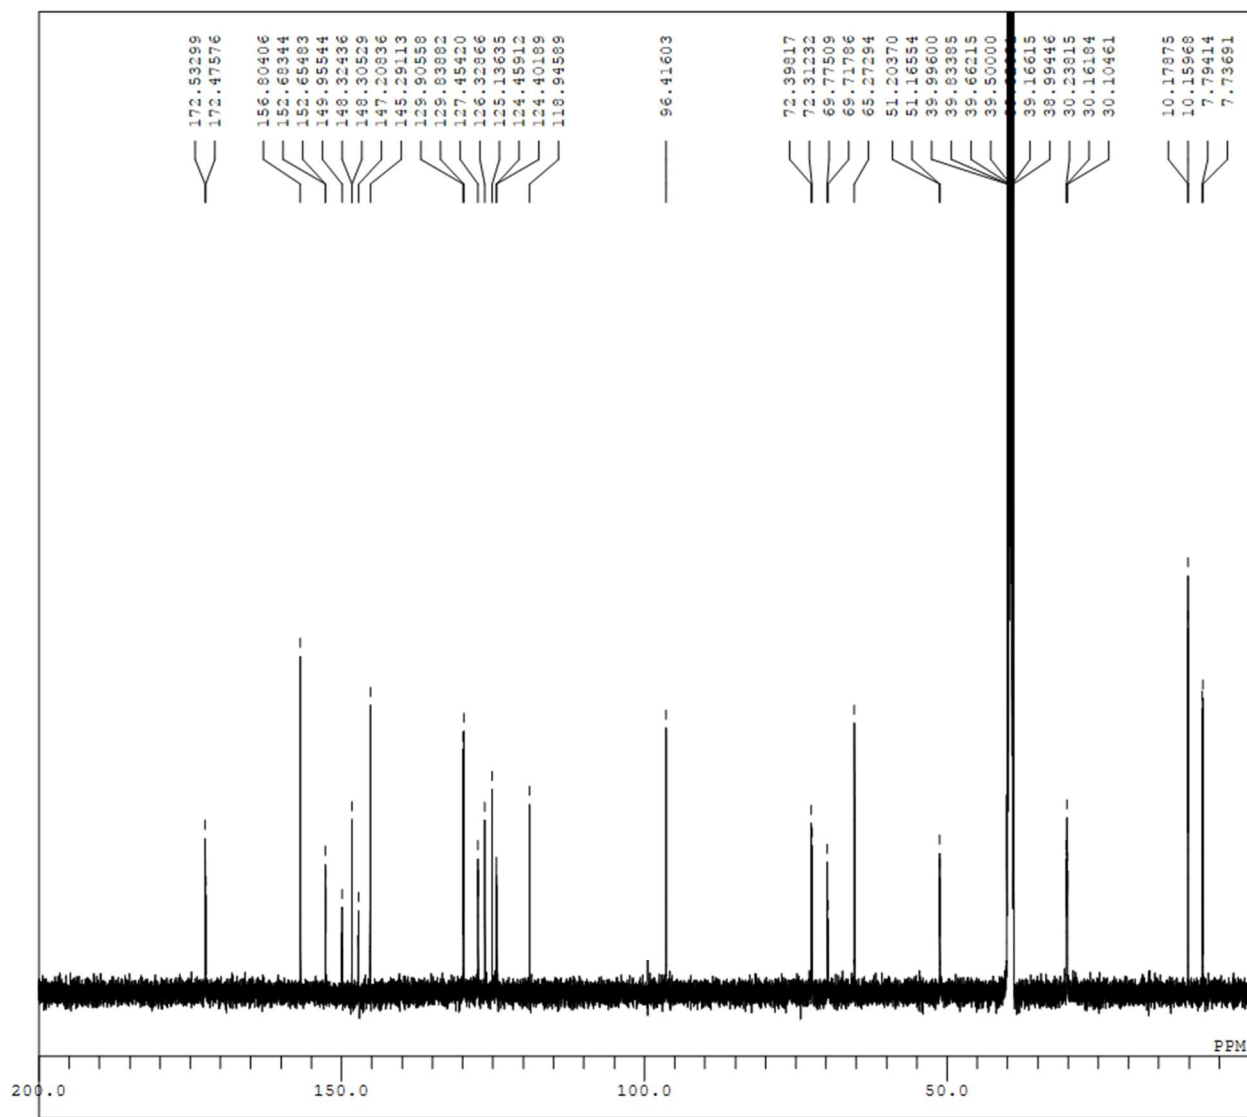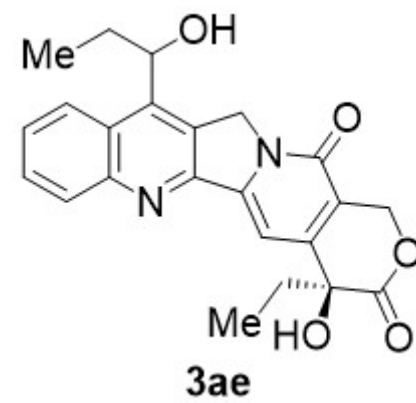

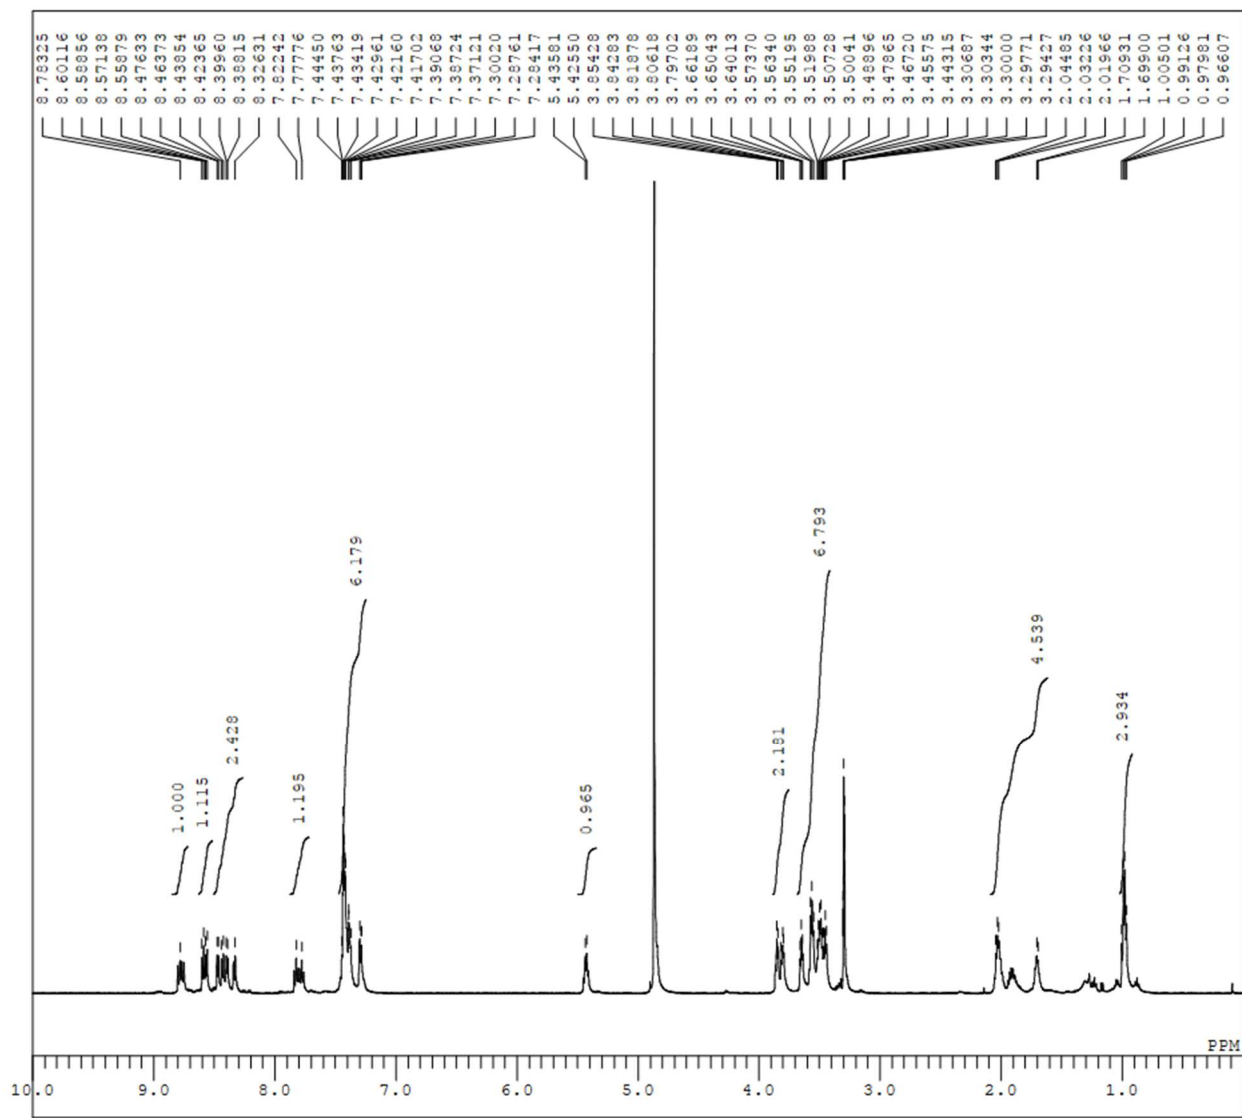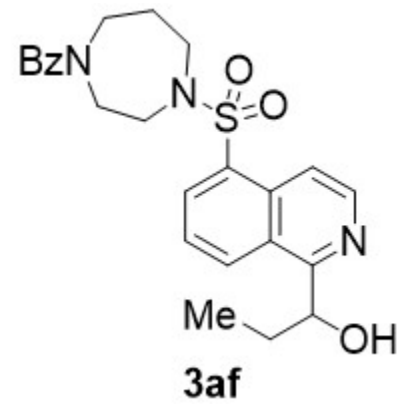

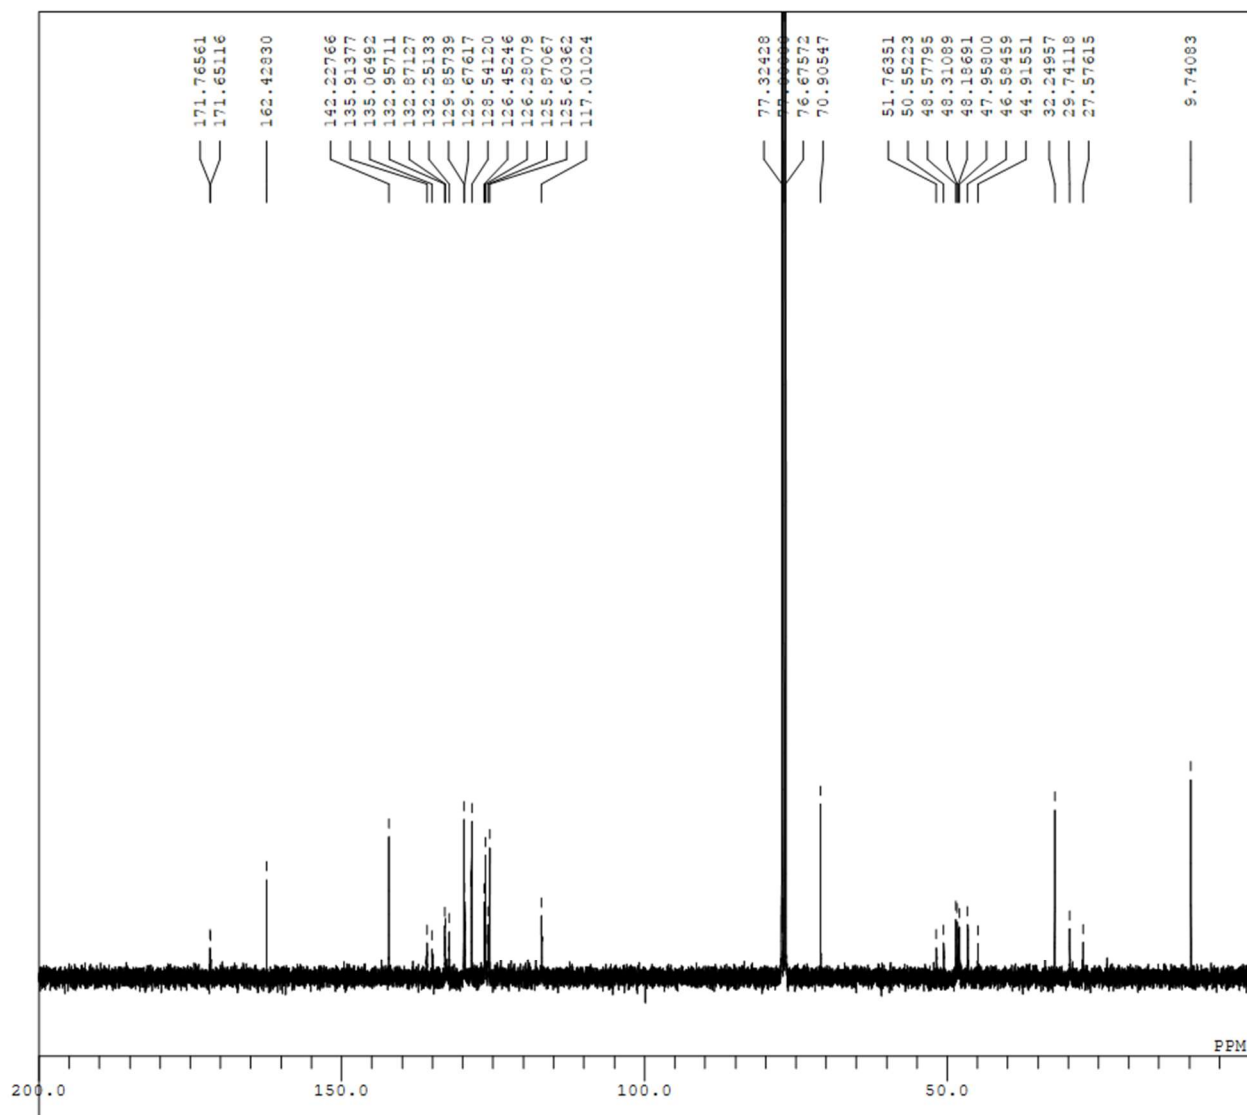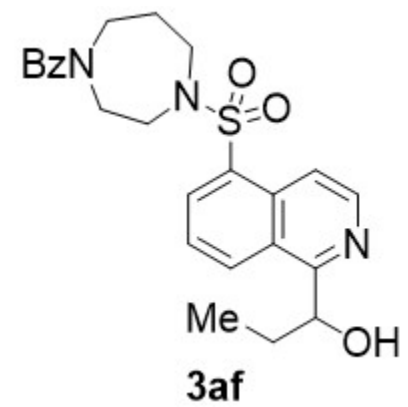

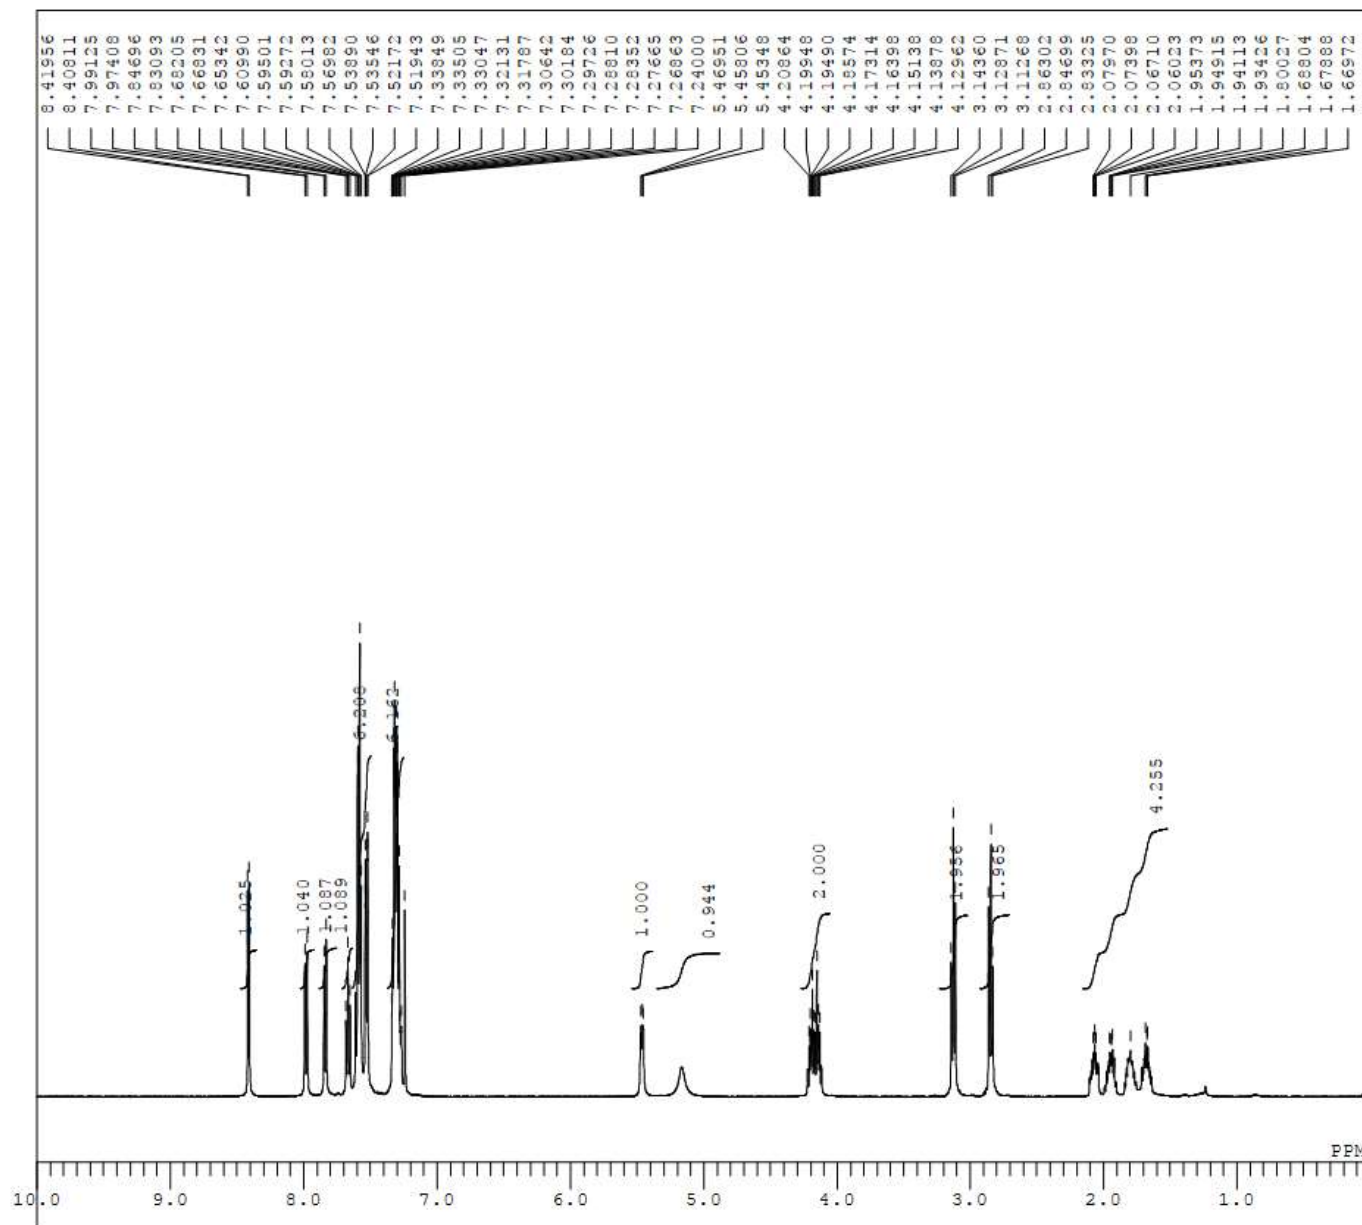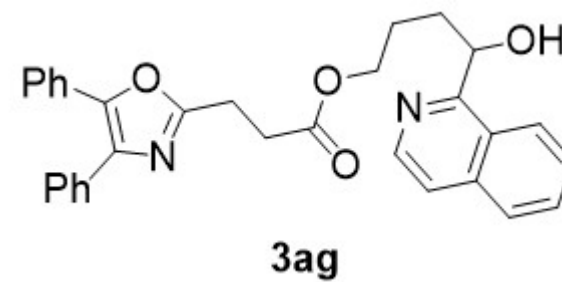

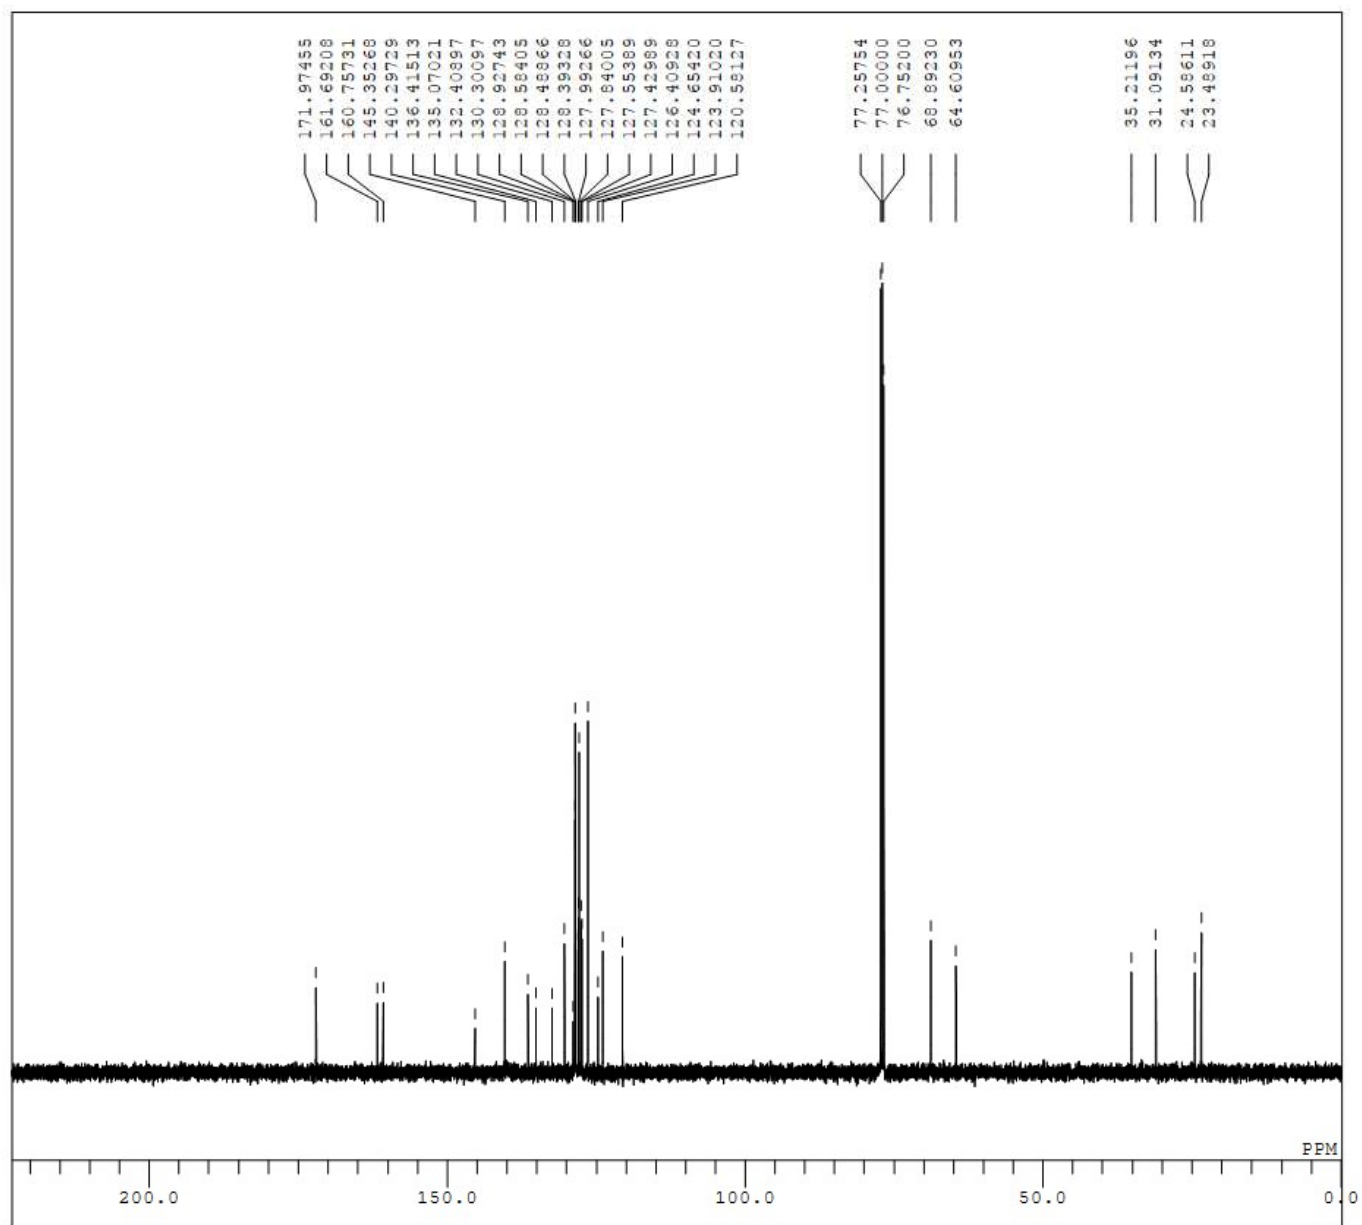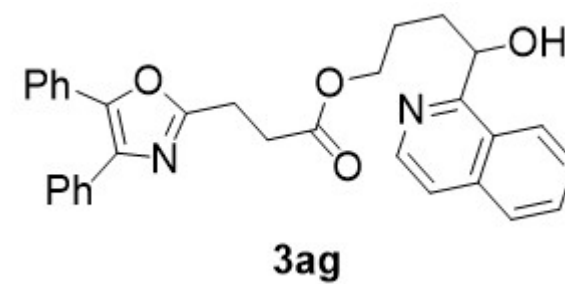

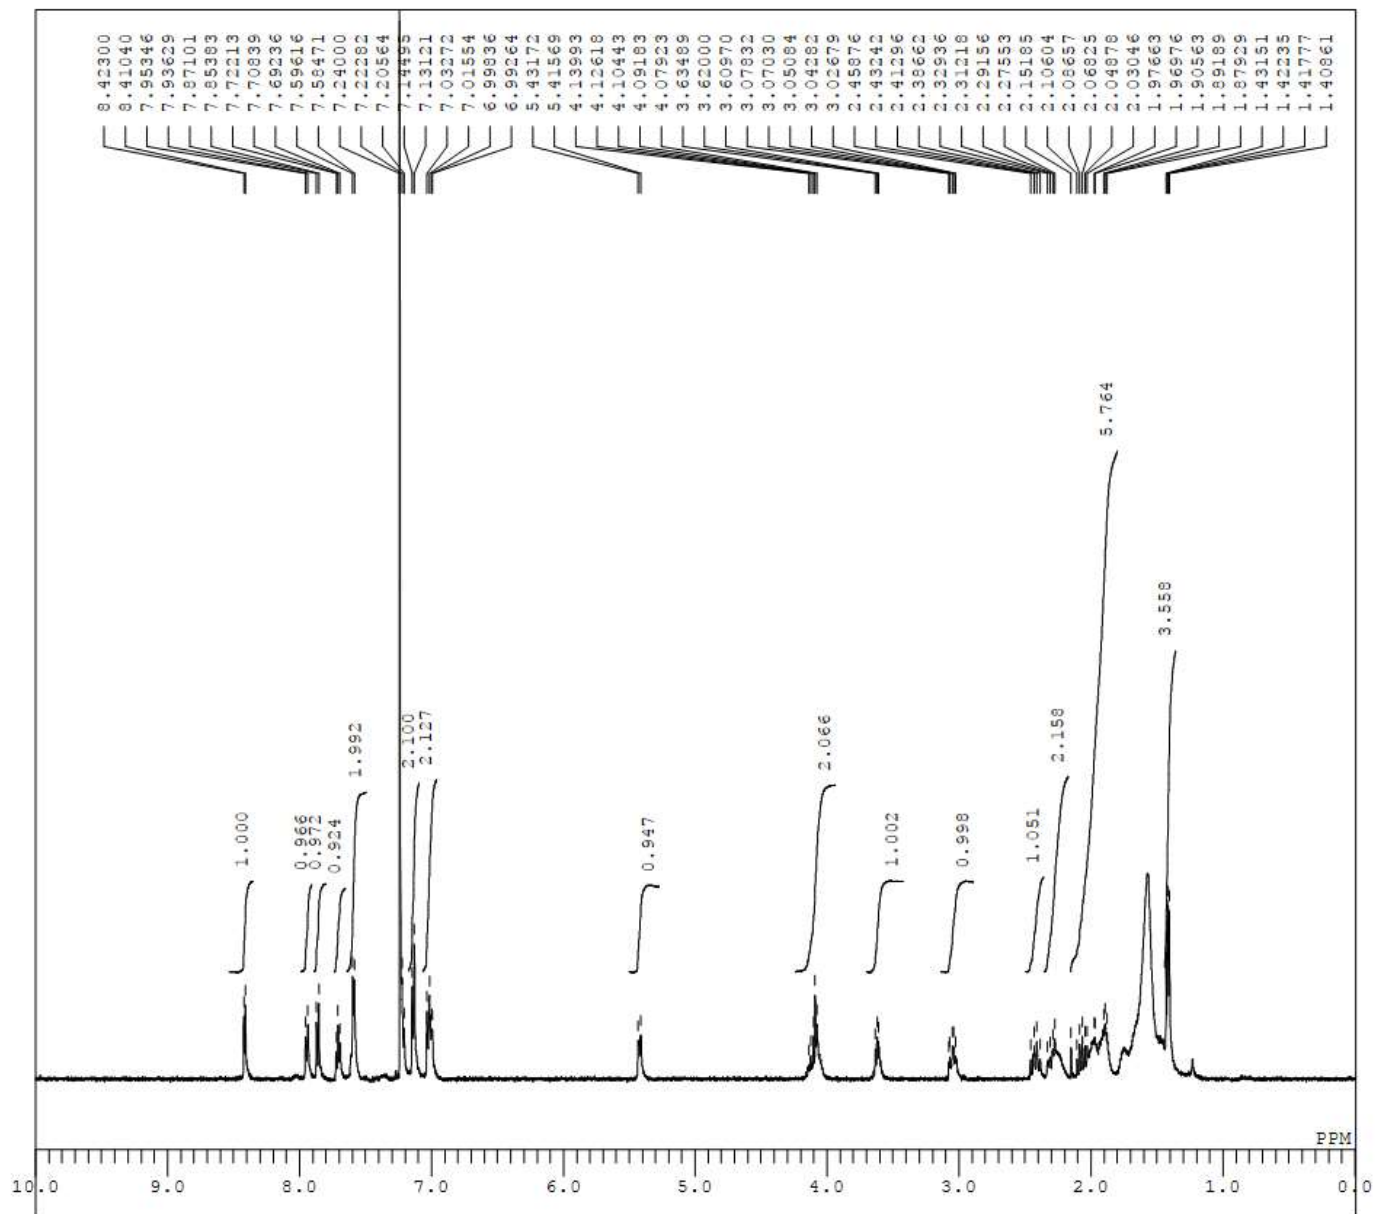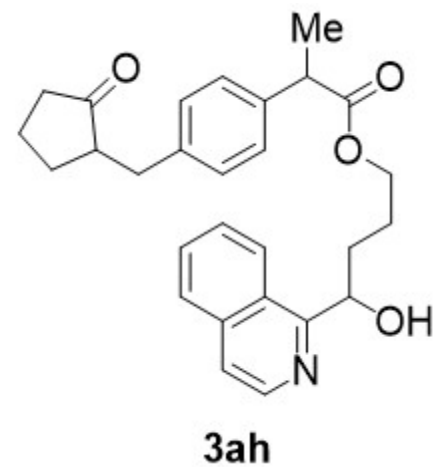

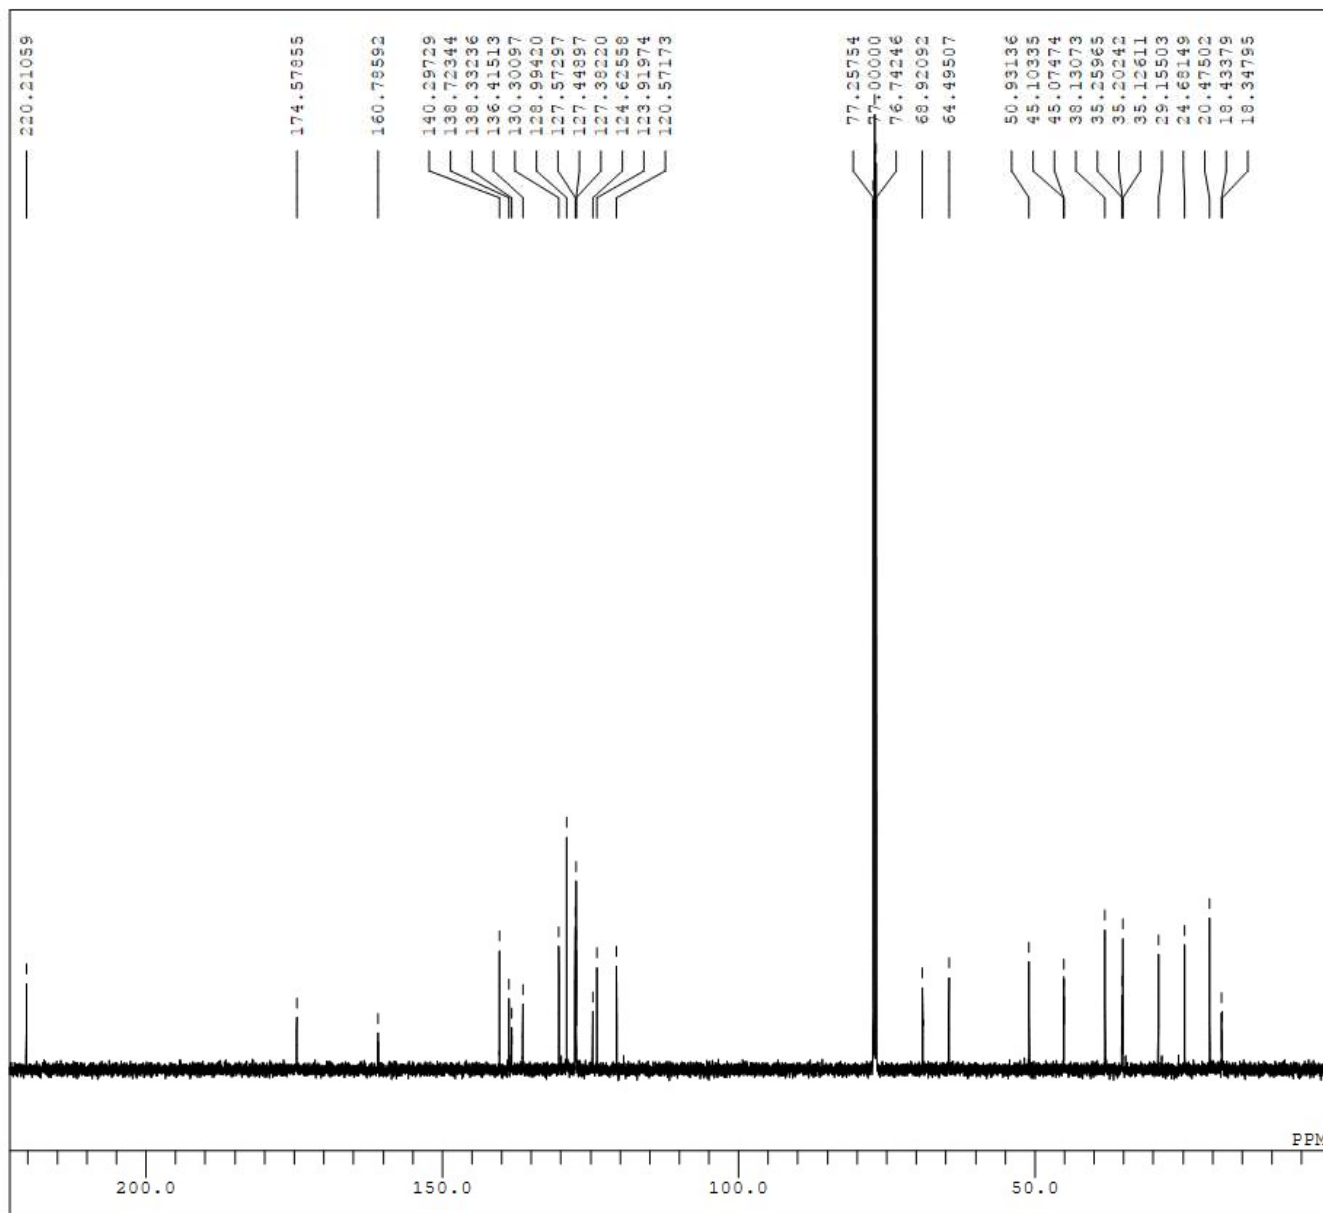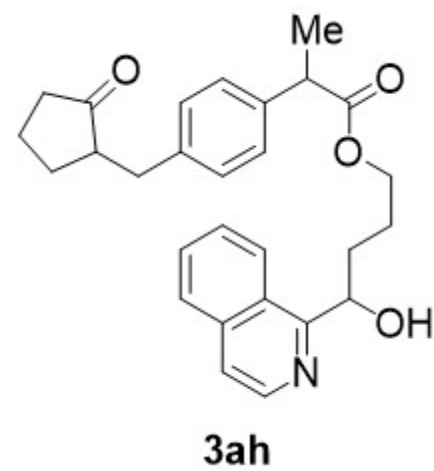



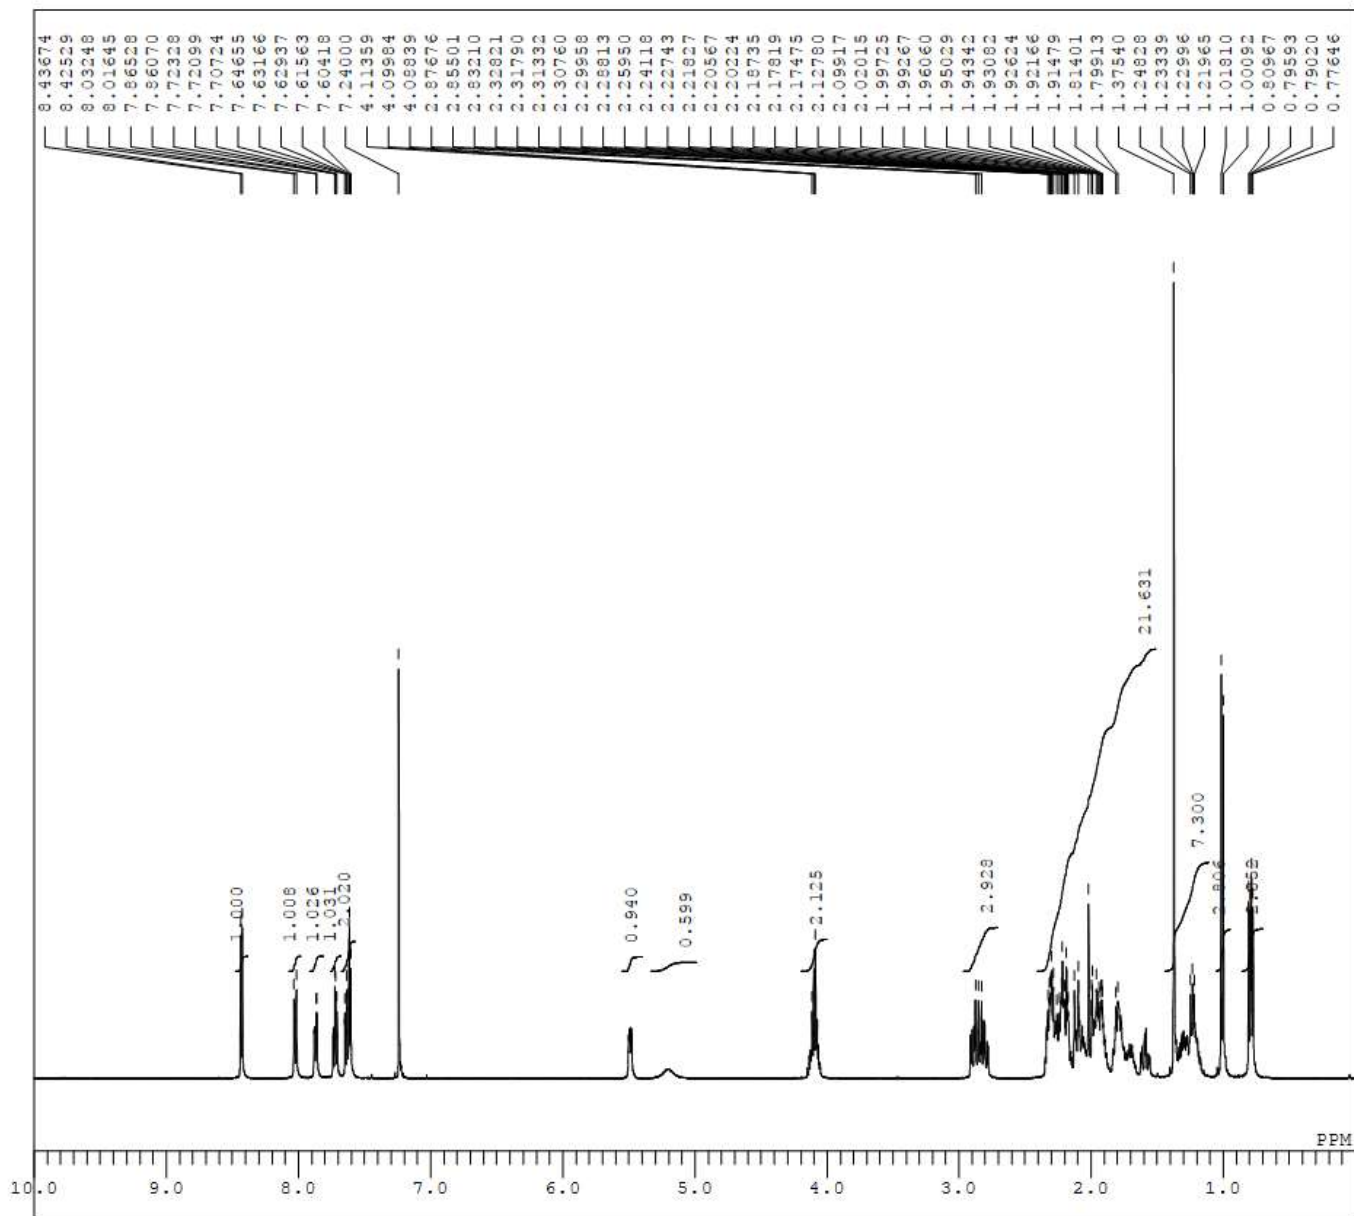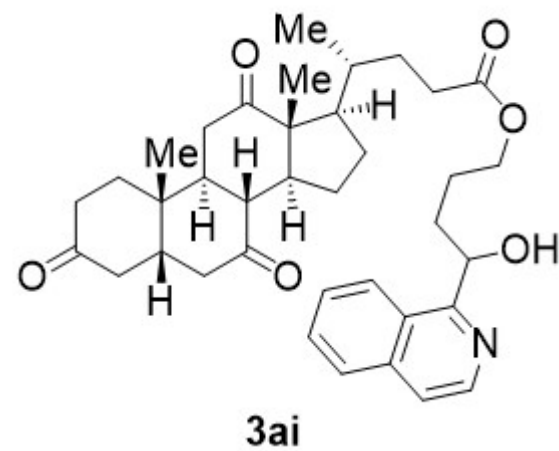

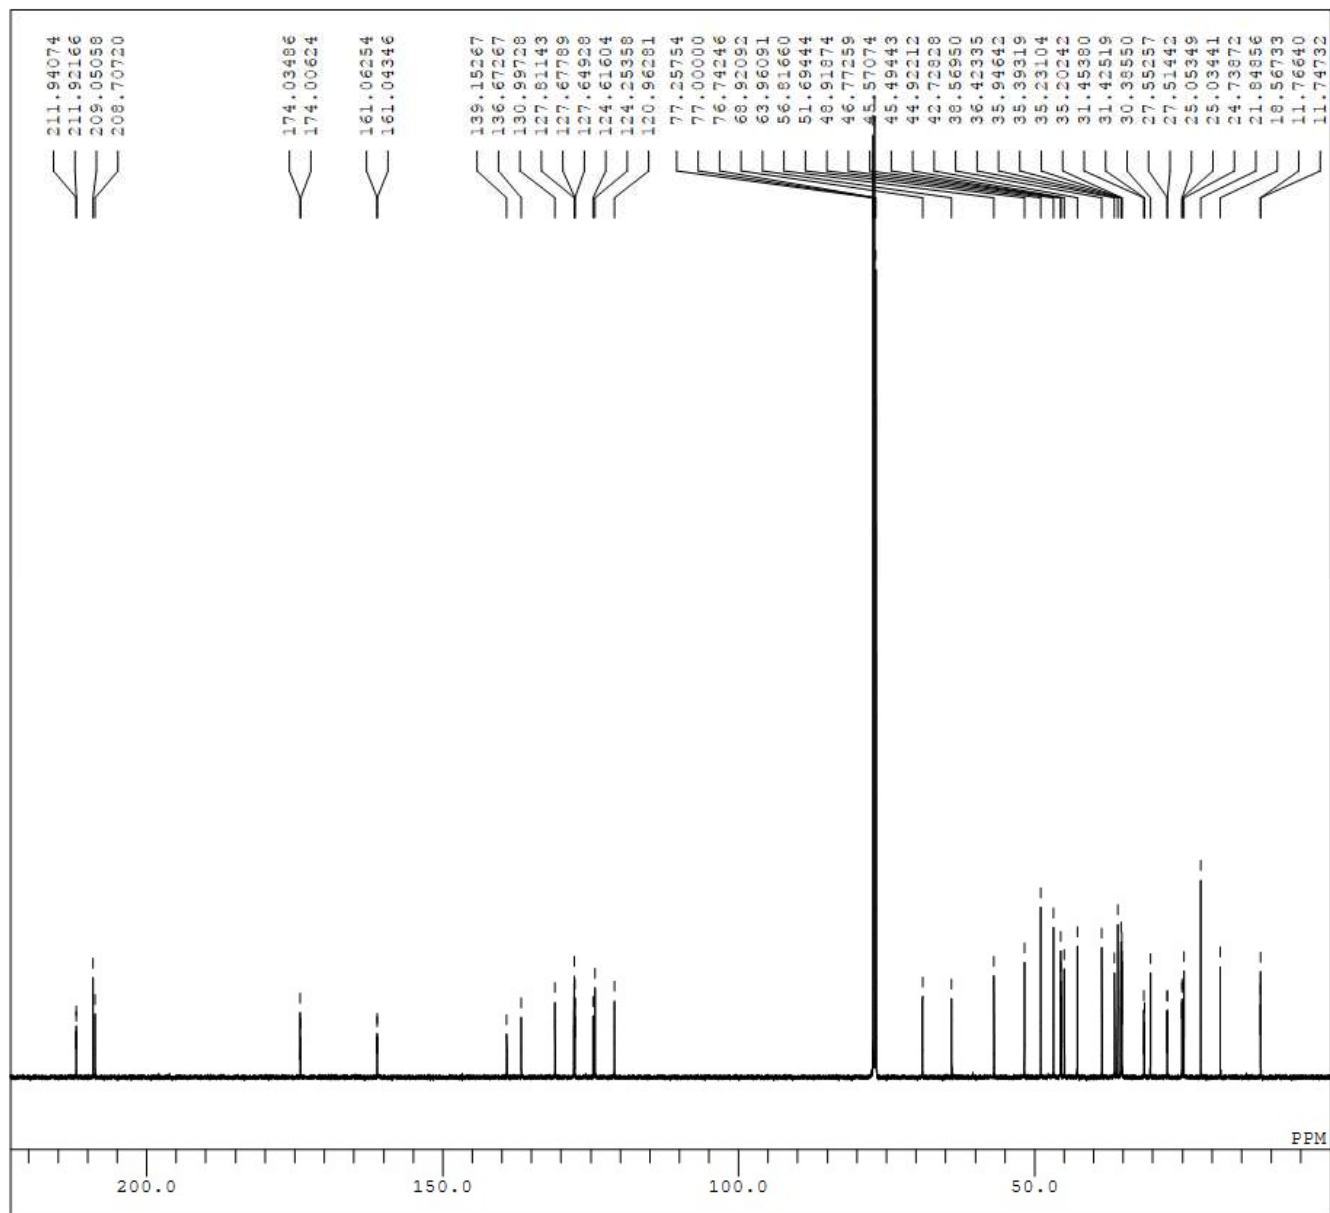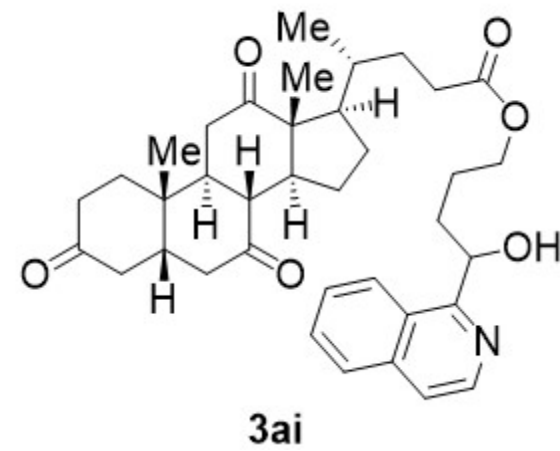

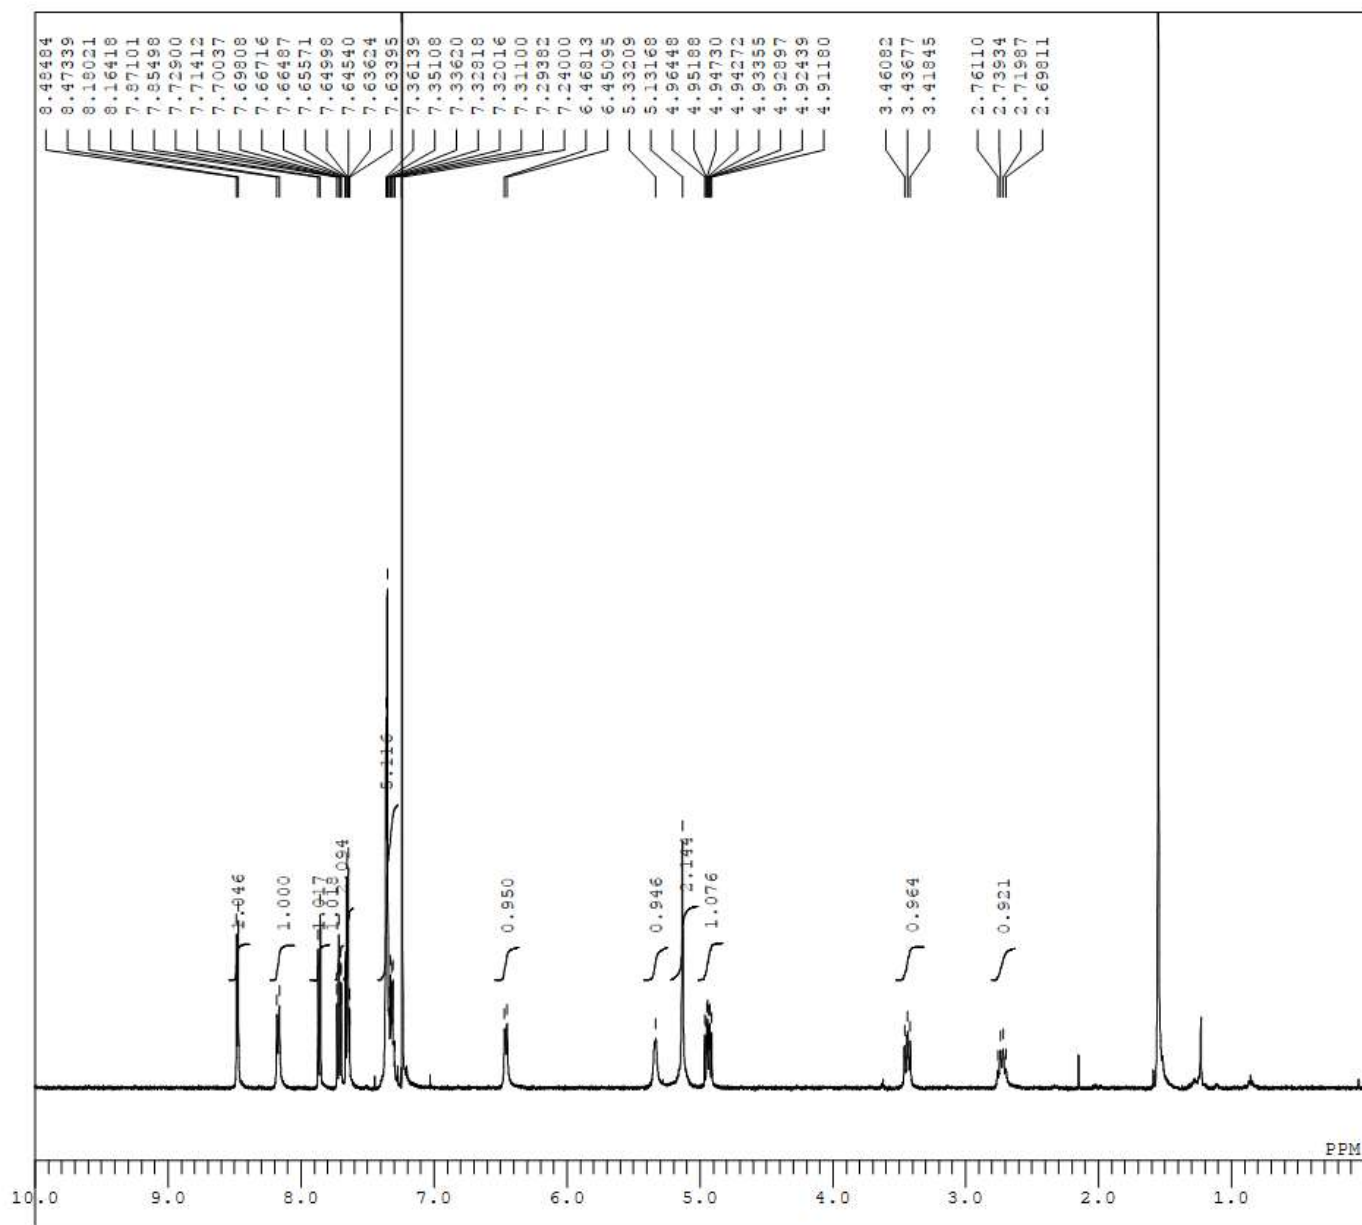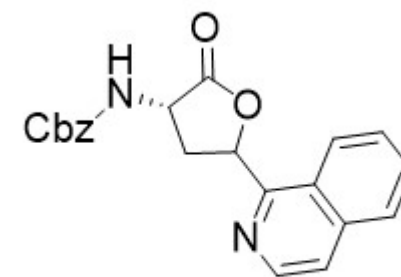

**3aj'**

major isomer

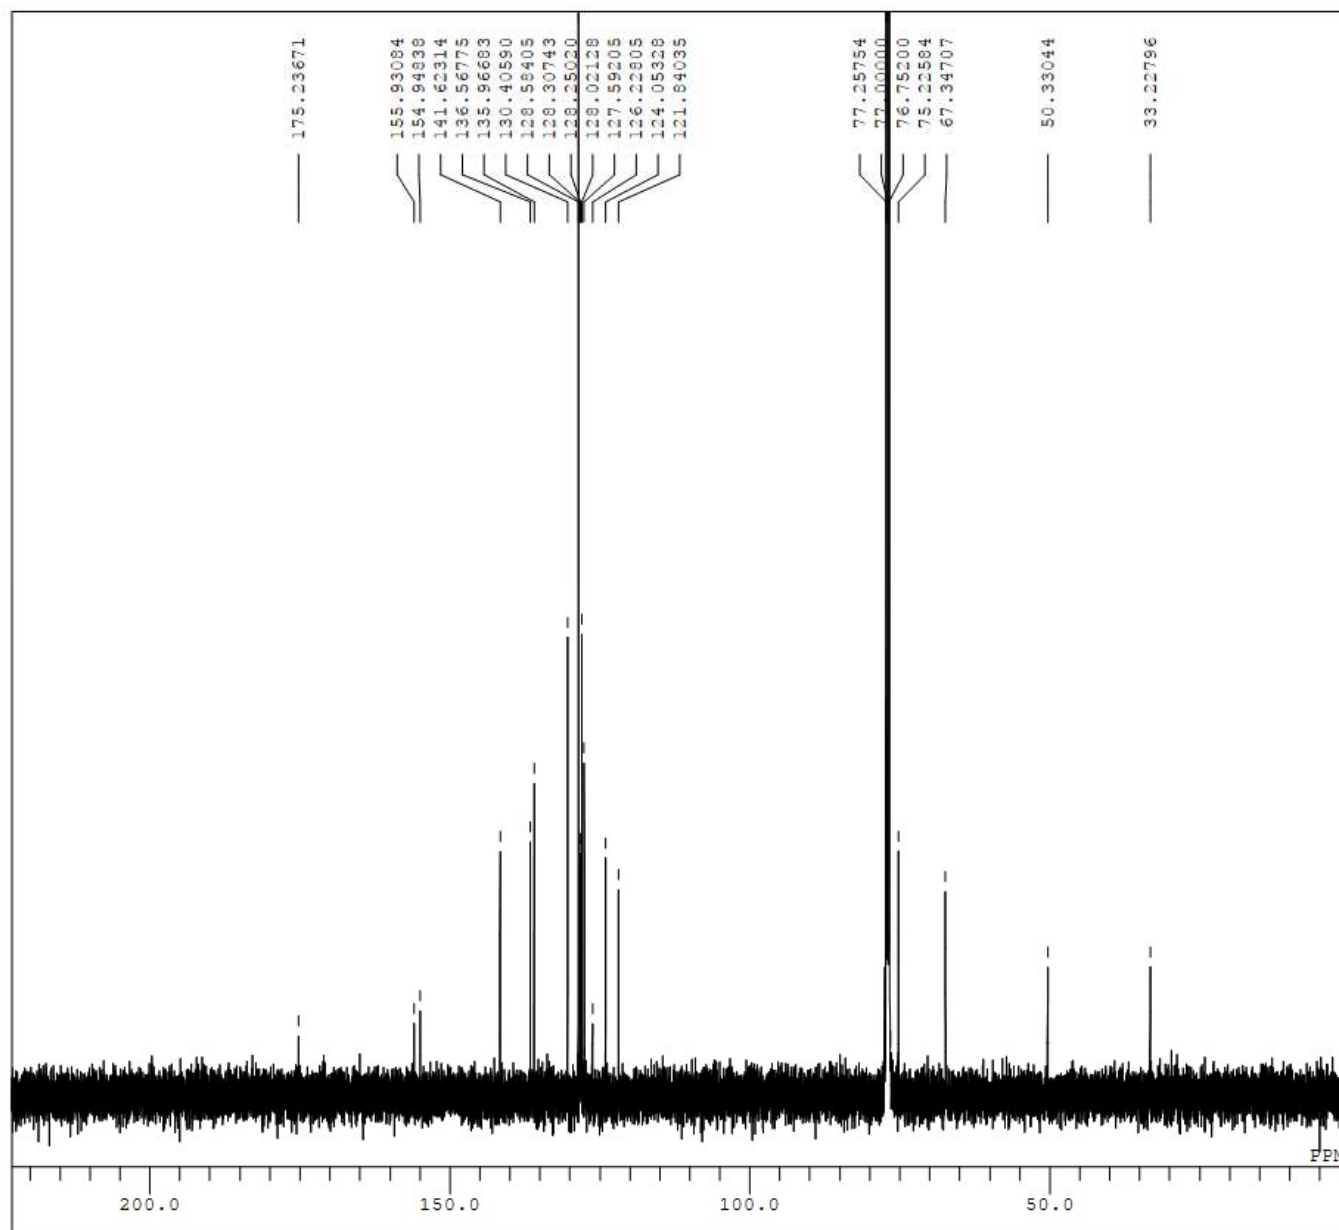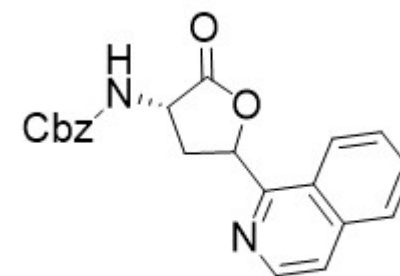

**3aj'**

major isomer

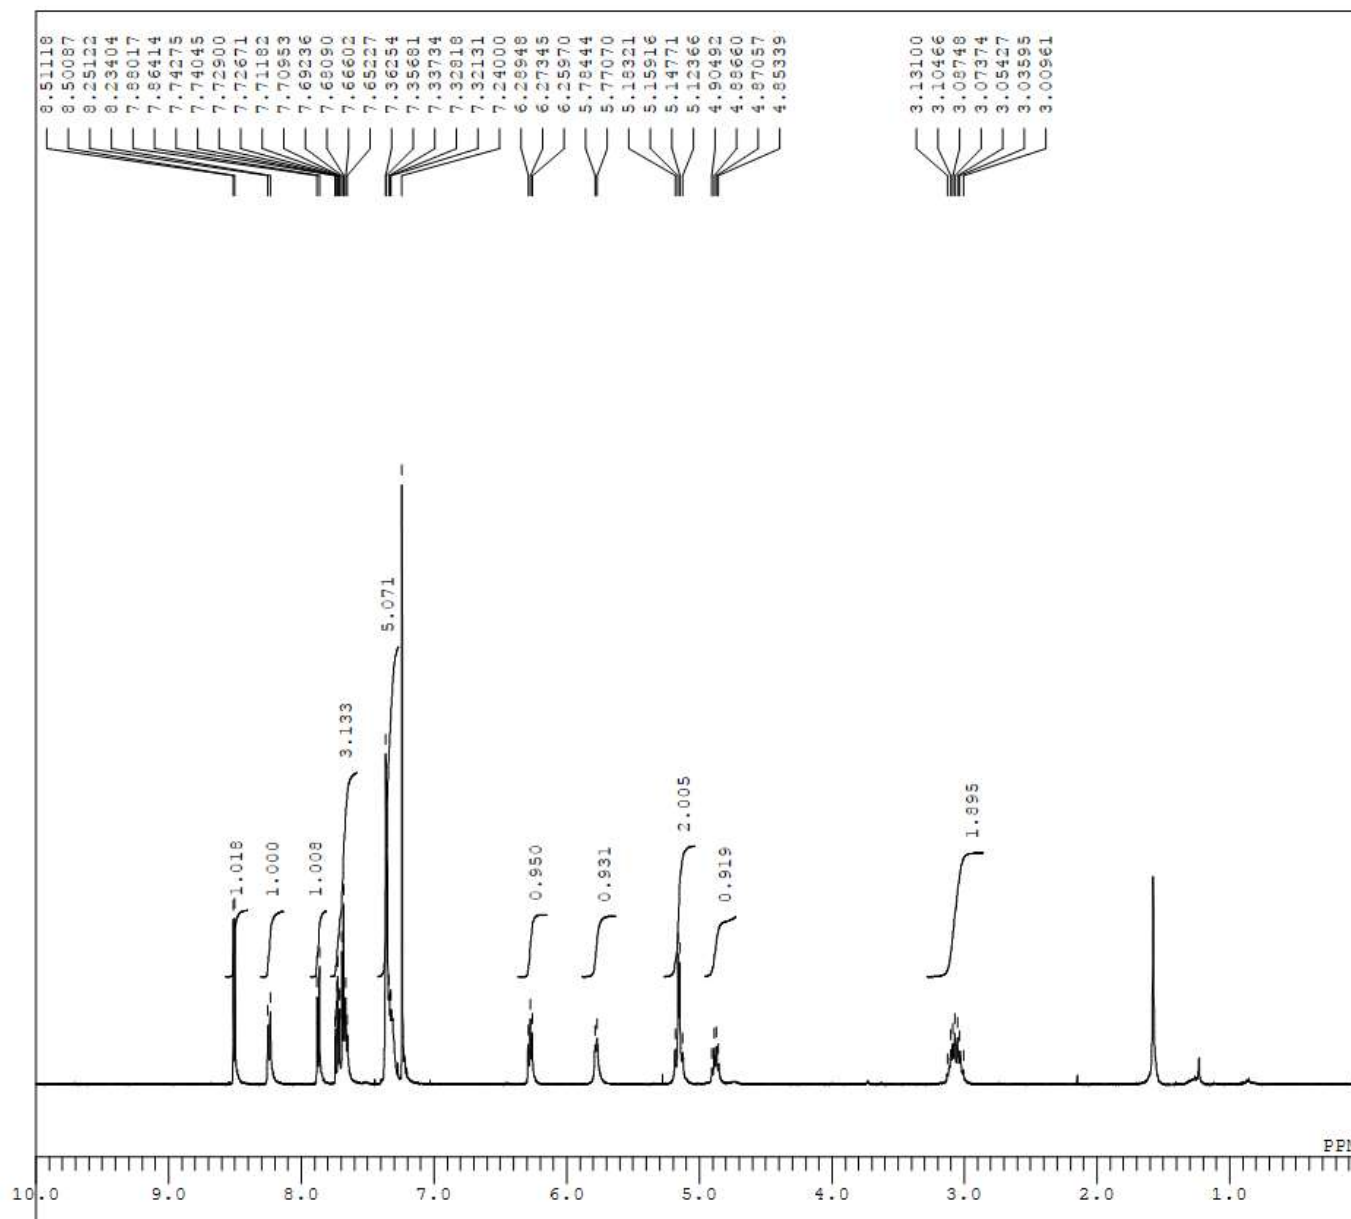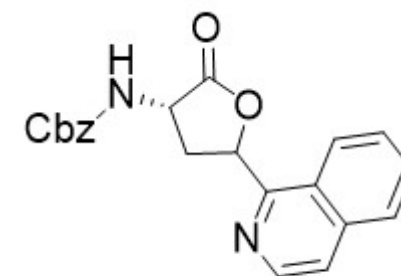

**3aj'**

minor isomer

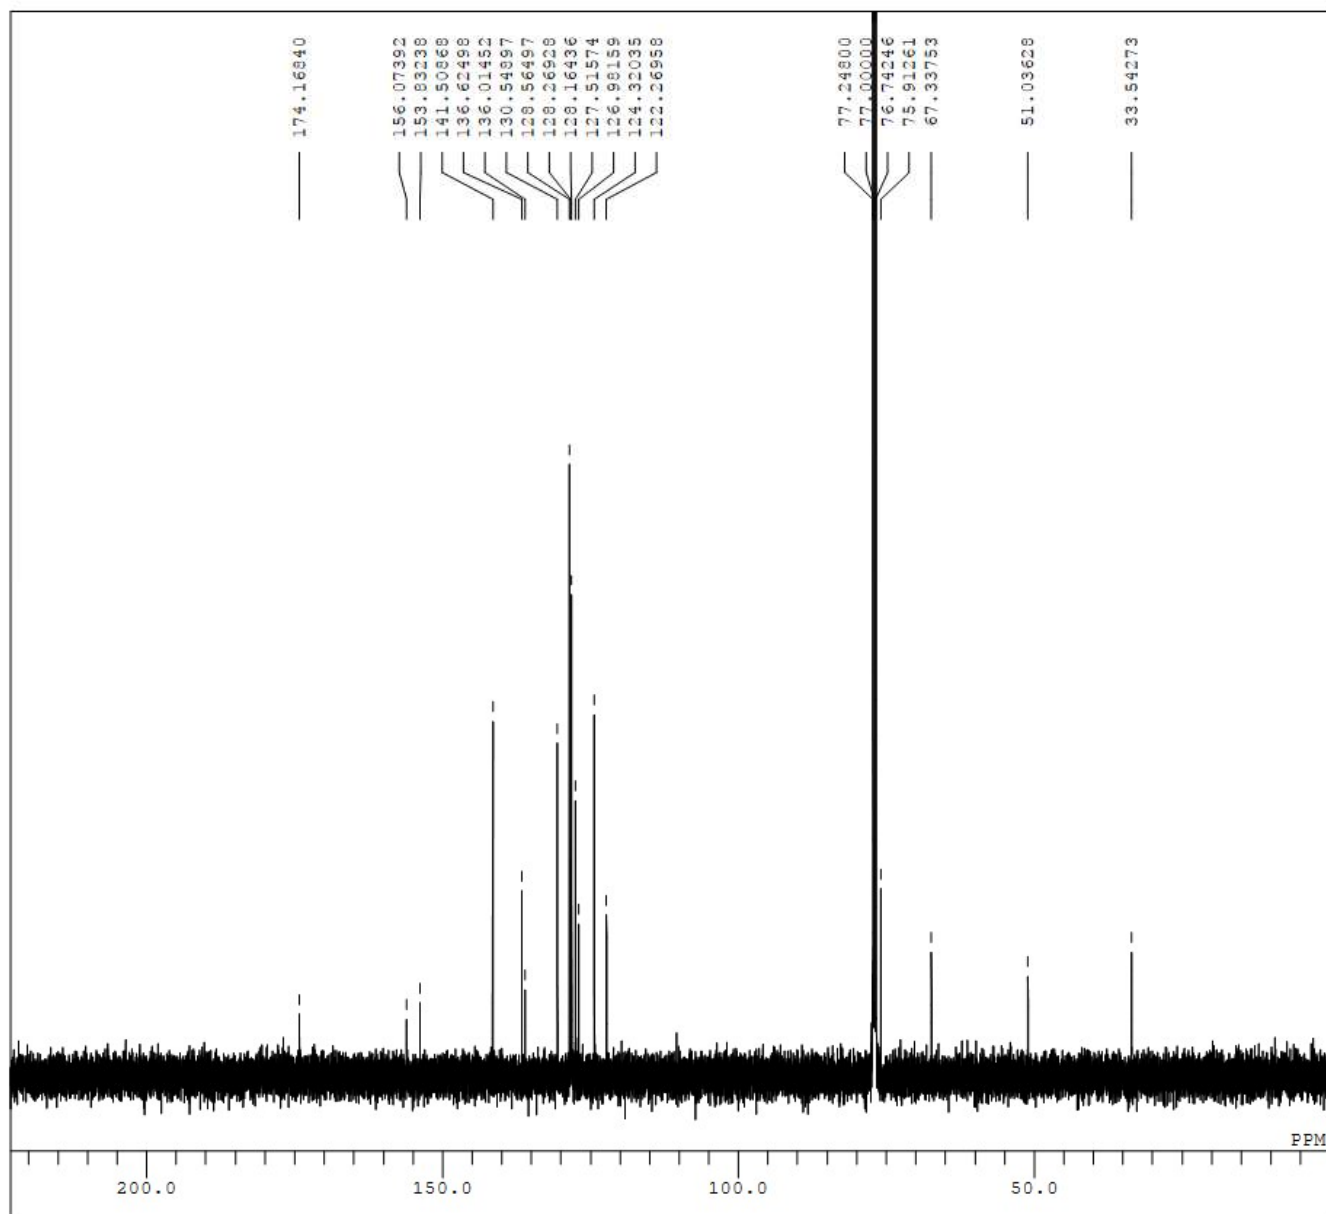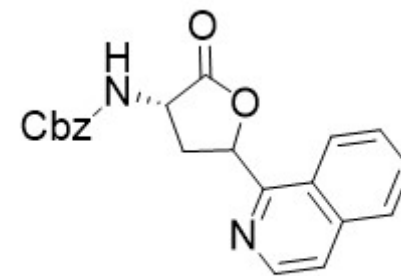

**3aj'**

minor isomer

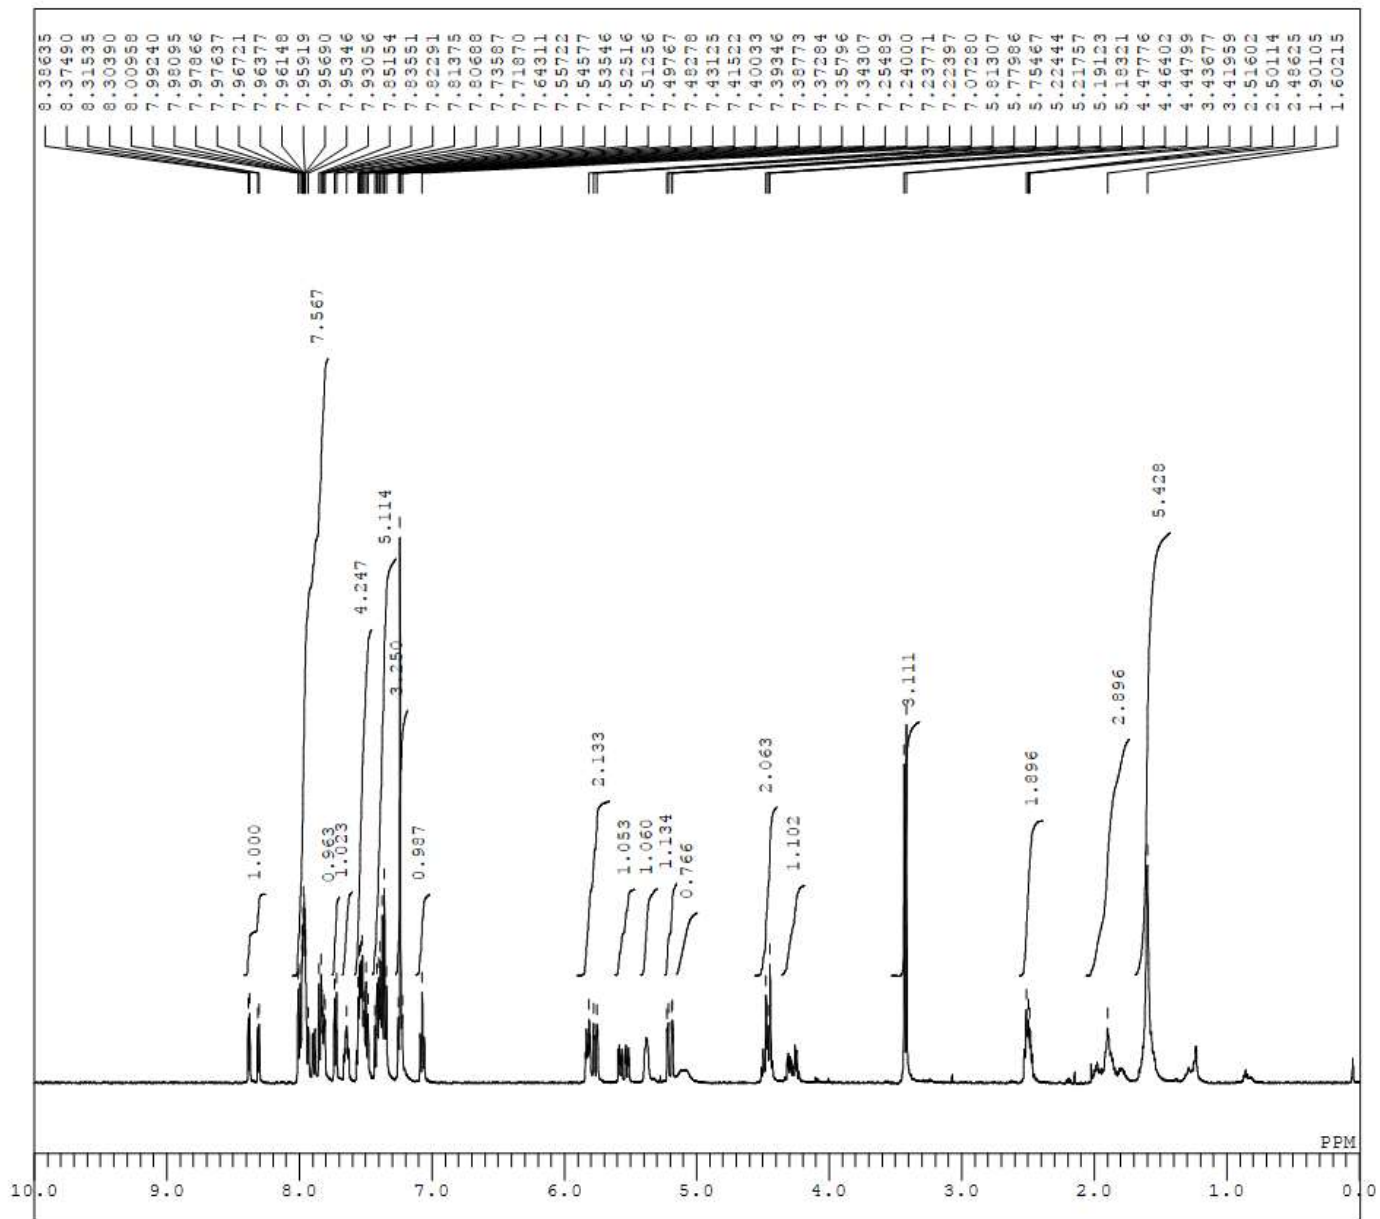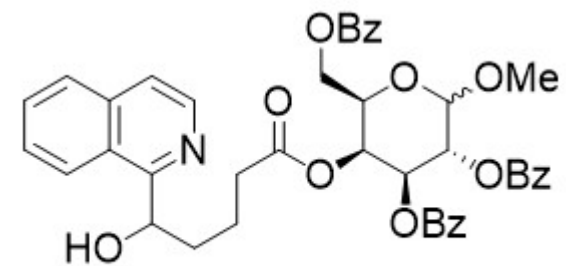

**3ak**

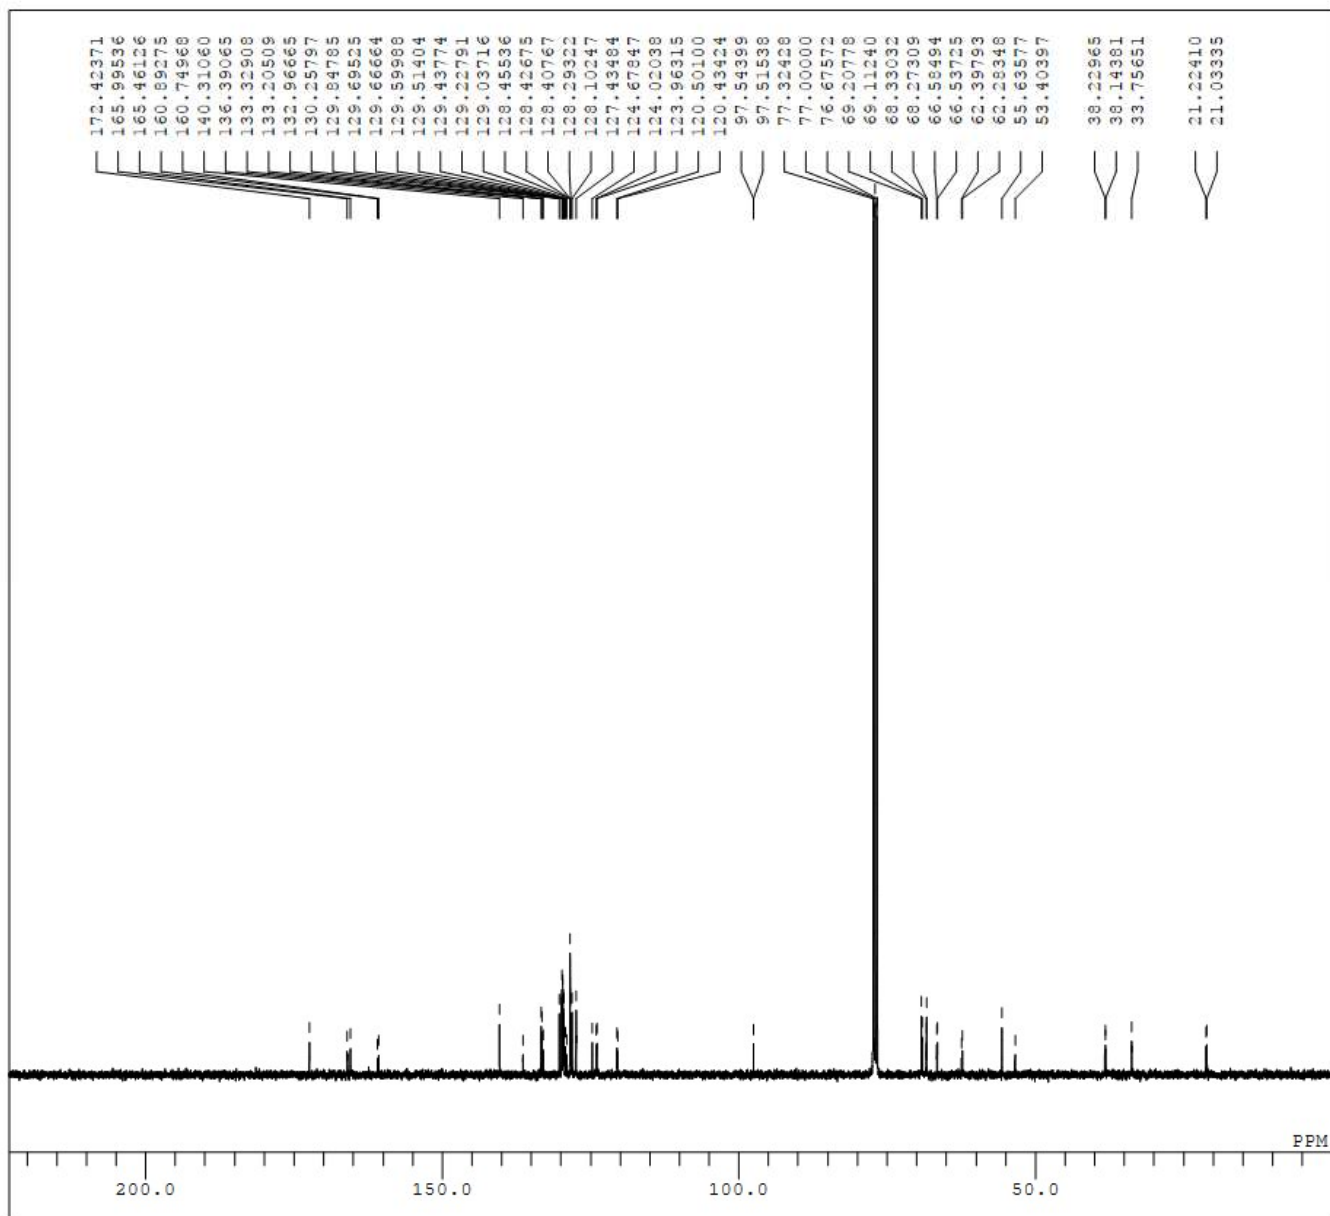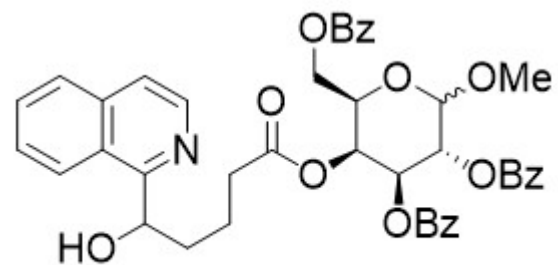

**3ak**
